# Supplementary material
Source: PubMed Central journal article supplement (PMC6197432)

## Supporting Information

# **Efficient and Stereodivergent Synthesis of Unsaturated Acyclic Fragments Bearing Contiguous Stereogenic Elements**

Authors: Jeffrey Bruffaerts, David Pierrot, Ilan Marek

The Mallat Family Laboratory of Organic Chemistry, Schulich Faculty of Chemistry and Lise Meitner-Minerva Center for Computational Quantum Chemistry, Technion-Israel Institute of Technology, Haifa 32000, Israel.

Email: [chilanm@technion.ac.il](mailto:chilanm@technion.ac.il)

## Table of contents

|                                                                                                                     |     |
|---------------------------------------------------------------------------------------------------------------------|-----|
| Table of contents .....                                                                                             | 2   |
| General information .....                                                                                           | 3   |
| Procedures for the syntheses of starting materials .....                                                            | 4   |
| General procedure for the preparation of <b>1a</b> and <b>1b</b> .....                                              | 4   |
| General procedures for the preparation of <b>3c-v</b> .....                                                         | 4   |
| General procedure for the Heck arylation of vinylcyclopropylcarbinols with arylboronic acids .....                  | 15  |
| Typical procedure for the Heck vinylation of vinylcyclopropyl carbinol 3c with cyclohexenyl triflate .....          | 30  |
| General procedure for the Fujiwara-Moritani insertion of <i>N</i> -methylindole on vinylcyclopropyl carbinols ..... | 32  |
| Comparison of the <sup>13</sup> C NMR spectra of stereoisomers 4p, 4am, 4an and 4ao .....                           | 34  |
| Determination of the enantiospecificity .....                                                                       | 37  |
| Determination of the relative configuration .....                                                                   | 39  |
| NMR spectras of vinyl halides 2h-j.....                                                                             | 56  |
| NMR spectras of vinylcyclopropylcarbinols 3b-v .....                                                                | 59  |
| NMR spectras of aldehydes 4a-4ar .....                                                                              | 80  |
| NMR spectras of derivatives 5, 6a and 6b.....                                                                       | 125 |

## General information

Unless stated otherwise, reactions were conducted in flame-dried glassware under a positive pressure of argon. Ether and THF were dried from Pure-Solv<sup>®</sup> Purification System (Innovative Technology<sup>®</sup>). DMF was distilled over CaH<sub>2</sub> and stored over activated 4 Å molecular sieves under argon. [Pd(OTf)<sub>2</sub>(MeCN)<sub>2</sub>] was freshly prepared and stored under a dry atmosphere.<sup>1</sup> Grignard reagents (to the exception of MeMgBr) were prepared in solution in Et<sub>2</sub>O and freshly titrated with menthol and 1,10-phenanthroline as indicator prior use. All other commercially obtained reagents were used as received. Thin-layer chromatography (TLC) was conducted with E. Merck silica gel 60 F254 pre-coated plates (0.25 mm), and visualized by exposure to UV light (254 nm) or stained with anisaldehyde, phosphomolybdic acid, or potassium permanganate solutions. Column chromatography was performed using Fluka silica gel 60 Å (40-63mm, 230-400 mesh). NMR spectra were recorded on Bruker spectrometers (AVIII400) and are reported relative to deuterated solvent signals. Chemical shifts are reported in parts per million (ppm) with respect to the residual solvent signal CDCl<sub>3</sub> (<sup>1</sup>H NMR: δ = 7.26; <sup>13</sup>C NMR: δ = 77.16). Peak multiplicities are reported as follows: s = singlet, bs = broad singlet, d = doublet, t = triplet, dd = doublet of doublets, td = triplet of doublets, m = multiplet. High-resolution mass spectra (HRMS) were obtained by the mass spectrometry facility at the Technion. Reactions were monitored by gas chromatography spectrometry (GC) using an Agilent Technologies 7820A GC with an Agilent Technologies 19091J-413 (30 m × 0.3 mm) column. Enantiomeric excesses were determined by chiral-HPLC using Agilent<sup>®</sup>1100 Series line and CHIRALPAK<sup>®</sup>AY-H (0.46 cm Ø×25 cm) and CHIRALPAK<sup>®</sup> AZ-H (0.46 cm Ø×25 cm).

---

<sup>1</sup> Drent, E.; van Broekhoven, J. A. M.; Doyle, M. J. *J. Organomet. Chem.* **1991**, *41*, 235.

## Procedures for the syntheses of starting materials

### General procedure for the preparation of **1a** and **1b**

(*E*)-vinylcyclopropyl carbinols **1a** and **1b** ( $R^3$ =Me,  $R^4$ =H) were synthesized according to a previously reported strategy.<sup>2</sup>

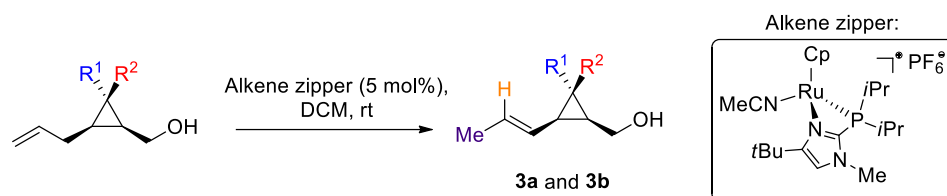

The characterization and preparation of compound **1a** ( $R^1$ =*n*Bu,  $R^2$ =Me,  $R^3$ =Me,  $R^4$ =H) was previously reported.<sup>2</sup>

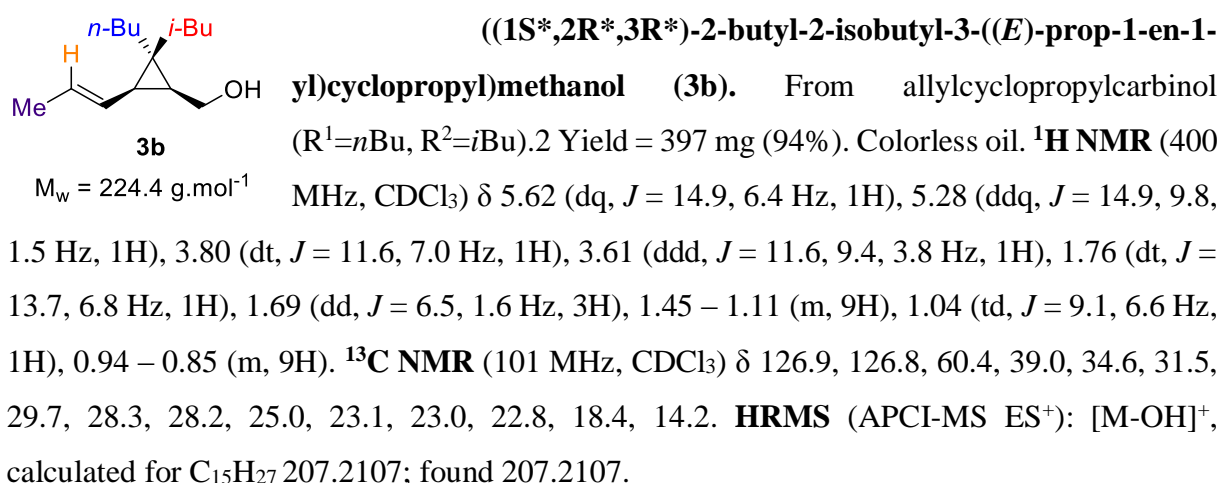

### General procedures for the preparation of **3c-v**

Except for **3a** and **3b**, all other vinylcyclopropyl carbinols were synthesized according to the following strategy.

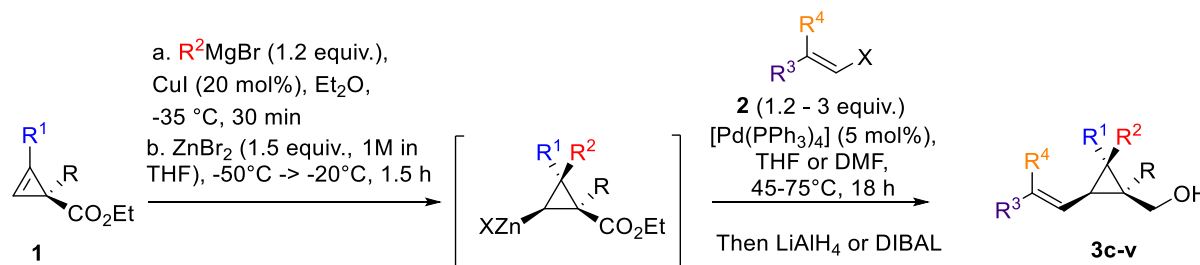

<sup>2</sup> Bruffaerts, J.; Vasseur, A.; Marek, I. *Adv. Synth. Catal.* **2018**, DOI 10.1002/adsc.201701481

Racemic cyclopropenes ethyl esters **1a**,<sup>3</sup> **1b**,<sup>4</sup> **1c**,<sup>5</sup> **1d**<sup>6</sup> and **1e**<sup>7</sup> were synthesized according to previously reported procedures. (*Z*)-1-bromoprop-1-ene (**2a**) was used as received from commercial sources. (*Z*)-1-iodohex-1-ene (**2b**) was prepared following the works of Brown and coworkers.<sup>8</sup> (*E*)-1-bromohex-1-ene (**2c**), (*E*)-1-bromo-3-methylbut-1-ene (**2d**), (*E*)-(3-bromoallyl)benzene (**2e**), (*E*)-1-bromo-3,3-dimethylbut-1-ene (**2f**) and (*E*)-1-bromo-5-chloropent-1-ene (**2g**) were prepared following the general procedure described by Alexakis and coworkers,<sup>9</sup> and were consistent with the literature.

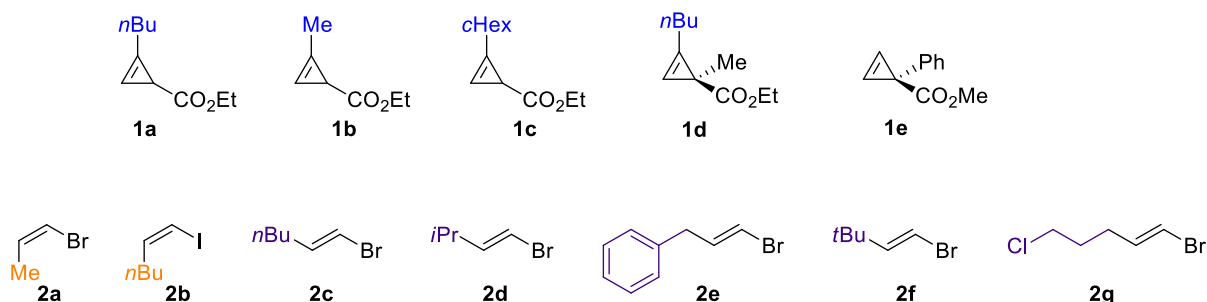

The typical procedure (zirconocene-catalyzed methylalumination of alkynes) previously described<sup>10</sup> was followed to prepare **2h**.

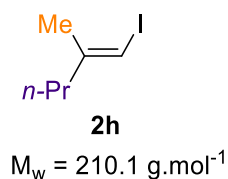

**(E)-1-iodo-2-methylpent-1-ene (2h)**. From 1-pentyne (50 mmol scale). Yield = 10.5 g (76%). Pale yellow liquid. *E/Z* > 99:1. <sup>1</sup>H NMR (400 MHz, CDCl<sub>3</sub>) δ 5.84 (d, *J* = 1.0 Hz, 1H), 2.16 (t, *J* = 14.8 Hz, 2H), 1.80 (s, 3H), 1.44 (dq, *J* = 14.7, 7.4 Hz, 2H), 0.86 (dt, *J* = 7.4, 1.0 Hz, 3H). <sup>13</sup>C NMR (101 MHz, CDCl<sub>3</sub>) δ 147.58, 74.90, 41.72, 23.89, 21.02, 13.70. HRMS (TOF-MS ES<sup>+</sup>) [M+H]<sup>+</sup>, calculated for C<sub>6</sub>H<sub>12</sub>I; 210.9884; found 210.9981.

The typical procedure (carbocupration of alkynes) previously described<sup>11</sup> was followed to

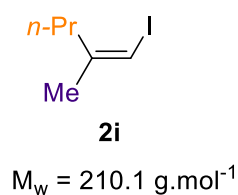

prepare **4i** and **4j**.

**(Z)-1-iodo-2-methylpent-1-ene (2i)**. From propylmagnesium bromide (30 mmol) and an excess of 1-propyne. Yield = 6.3 g (82%). Pale yellow liquid.

<sup>3</sup> Li, C.; Zhang, H.; Feng, J.; Zhang, Y.; Wang, J. *Org. Lett.* **2010**, *12*, 3082.

<sup>4</sup> Lia, L.; Zhang, F.; Yan, N.; Golen, J. A.; Fox, J. M. *Tetrahedron* **2004**, *60*, 1803.

<sup>5</sup> Masatumi, U.; Nobuyoshi, D.; Miyagawa, H.; Sugita, S.; Takeda, N.; Shinada, T.; Miyata, O. *Chem. Commun.* **2015**, *51*, 4204.

<sup>6</sup> Mueller, P.; Gaenicher, C. *Helv. Chim. Acta* **1995**, *78*, 129.

<sup>7</sup> Rubina, M.; Rubin, M.; Gevorgyan, V. *J. Am. Chem. Soc.* **2003**, *125*, 7198.

<sup>8</sup> Brown, H. C.; Blue, C. D.; Nelson, D. J.; Bhat, N. G. *J. Org. Chem.* **1989**, *54*, 6064.

<sup>9</sup> D. Müller, A. Alexakis, *Chem. Eur. J.* **2013**, *19*, 15226-15239

<sup>10</sup> Wipf, P.; Lim, S. *Angew. Chem. Int. Ed.* **1993**, *32*, 1068.

<sup>11</sup> Lipshutz, B. H.; Sengupta, S. *Org. React.*, Organocopper Reagents: Substitution, Conjugate Addition, Carbo/Metallocupration, and Other Reactions, John Wiley & Sons, Inc., **2004**.

*Z/E* > 99:1. **<sup>1</sup>H NMR** (400 MHz, CDCl<sub>3</sub>) δ 5.83 (d, *J* = 1.3 Hz, 1H), 2.26 – 2.13 (m, 2H), 1.87 (d, *J* = 1.4 Hz, 3H), 1.51 – 1.38 (m, 2H), 0.94 (t, *J* = 7.4 Hz, 3H). **<sup>13</sup>C NMR** (101 MHz, CDCl<sub>3</sub>) δ 147.6, 74.0, 40.5, 23.3, 20.3, 13.8. **HRMS** (TOF-MS ES<sup>+</sup>) [M+H]<sup>+</sup>, calculated for C<sub>6</sub>H<sub>12</sub>I; 210.9884; found 210.9975.

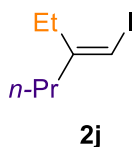

**(E)-1-iodo-2-ethylpent-1-ene (2j)**. From 1-pentyne (30 mmol scale). Yield = 6.7 g (78%). Pale yellow liquid. *E/Z* > 99:1. **<sup>1</sup>H NMR** (400 MHz, CDCl<sub>3</sub>) δ 5.80 (s, 1H), 2.30 – 2.07 (m, 4H), 1.52 – 1.37 (m, 2H), 0.99 (t, *J* = 7.6 Hz, 3H), 0.89 (t, *J* = 7.3 Hz, 3H). **<sup>13</sup>C NMR** (101 MHz, CDCl<sub>3</sub>) δ 152.9, 73.6, 38.8, 30.4, 21.0, 13.7, 11.7. **HRMS** (TOF-MS ES<sup>+</sup>) [M+H]<sup>+</sup>, calculated for C<sub>7</sub>H<sub>14</sub>I; 225.0140; found 225.0149.

#### Procedure A (3c-v)

In a flamed-dried three-neck flask under Ar, CuI (10 mol%) and a cyclopropene **3** (1 equiv) were dissolved into Et<sub>2</sub>O (8 mL / mmol substrate) and this solution was cooled down to -45°C. Then, the Grignard reagent (1.5 equiv, in solution in Et<sub>2</sub>O) was added dropwise and the resulting solution was let to stir from -35°C to -25°C (conversion monitored by TLC and/or GC). Following the complete conversion of **3**, the reactional mixture was then cooled to -50°C and a solution of flame-dried ZnBr<sub>2</sub> (1 M in THF, 1.5 equiv.) and anhydrous THF (20 mL) were successively added and the resulting white suspension was let to warm-up until -20°C (*c.a.* 1.5 h) under vigorous stirring. At room temperature, [Pd(PPh<sub>3</sub>)<sub>4</sub>] (10 mol%) and the 1-alkenyl halide **4** (1.5 equiv, 1.5 mmol) were added. The reaction mixture was heated at 50 °C for 16 hours. Upon completion, the reaction was quenched with a saturated solution of ammonium chloride and the aqueous phase was extracted with Et<sub>2</sub>O three times. The combined organic phases were dried over anhydrous MgSO<sub>4</sub>, filtered over a pad of celite (washed with Et<sub>2</sub>O) and concentrated under reduced pressure. The resulting crude mixture was directly engaged into the next reduction step.

In a flamed dried three-neck flask under Ar, to a solution of the vinylic cyclopropylcarbinol ester (1 equiv.) in THF (10 mL/mmol substrate) was dropwisely added to a suspension of DIBAL (1.0 M in hexane, 2.5 equiv, 2.5 mmol) (or diisobutyl aluminium deuteride in the case of **3n**) under stirring at 0°C. The reaction was warmed up to room temperature and run for 2 hours. After completion of the reaction, the reactional mixture was quenched with EtOAc, then, after 1h, a saturated aqueous solution of Rochelle salt (5 mL/mmol substrate) was carefully added

and the suspension was vigorously stirred for 1h at 0°C. The mixture was stirred until complete dissolution of the aluminium salts. The phases were separated and the aqueous phase was extracted with Et<sub>2</sub>O three times. The combined organic phases were dried over anhydrous Na<sub>2</sub>SO<sub>4</sub> and concentrated under reduced pressure. A column chromatography (15% Et<sub>2</sub>O in hexane) afforded the desired alcohol as a pure compound.

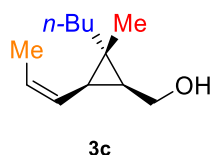

**(((1S\*,2S\*,3R\*)-2-butyl-2-methyl-3-((Z)-prop-1-en-1-yl)cyclopropyl)methanol (3c).** From **1a** (12 mmol scale) and **2a**. Yield = 1219 mg (56%). Colorless oil. *Z/E* > 99:1. *dr* > 95:5:0:0. <sup>1</sup>H NMR (400 MHz, CDCl<sub>3</sub>) δ 5.71 – 5.52 (m, 1H), 5.22 (ddd, *J* = 10.8, 9.1, 1.7 Hz, 1H), 3.75 – 3.59 (m, 1H), 1.71 (dd, *J* = 6.8, 1.6 Hz, 1H), 1.50 (t, *J* = 9.0 Hz, 1H), 1.44 – 1.22 (m, 3H), 1.12 (dd, *J* = 16.3, 8.2 Hz, 1H), 1.03 (s, 1H), 0.89 (t, *J* = 7.0 Hz, 3H). <sup>13</sup>C NMR (101 MHz, CDCl<sub>3</sub>) δ 126.6, 125.4, 60.3, 42.6, 31.0, 28.8, 25.4, 24.9, 22.8, 14.2, 13.3, 12.8. HRMS (TOF-MS ES<sup>+</sup>) [M-OH]<sup>+</sup>, calculated for C<sub>12</sub>H<sub>21</sub> 165.1652; found 165.1643.

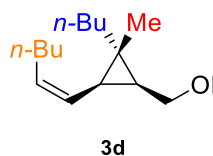

**(((1S\*,2S\*,3R\*)-2-butyl-3-((Z)-hex-1-en-1-yl)-2-methylcyclopropyl)methanol (3d).** From **1a** (5 mmol scale) and **2b**. Yield = 626 mg (57%). Colorless oil. *Z/E* > 99:1. *dr* > 95:5:0:0. <sup>1</sup>H NMR (400 MHz, CDCl<sub>3</sub>) δ 5.52 (dtd, *J* = 10.8, 7.3, 1.1 Hz, 1H), 5.18 (ddt, *J* = 10.8, 9.3, 1.5 Hz, 1H), 3.75 – 3.60 (m, 2H), 2.13 (ddd, *J* = 9.0, 7.9, 4.3 Hz, 2H), 1.50 (td, *J* = 9.2, 0.9 Hz, 1H), 1.43 – 1.19 (m, 11H), 1.10 (dd, *J* = 16.7, 8.0 Hz, 2H), 1.03 (s, 3H), 0.97 – 0.83 (m, 6H). <sup>13</sup>C NMR (101 MHz, CDCl<sub>3</sub>) δ 132.8, 124.3, 60.4, 42.6, 31.9, 31.1, 28.8, 27.5, 25.5, 25.1, 22.9, 22.4, 14.2, 14.0, 12.8. HRMS (TOF-MS ES<sup>+</sup>) [M+H]<sup>+</sup>, calculated for C<sub>15</sub>H<sub>29</sub>O, 225.2218; found 225.2190.

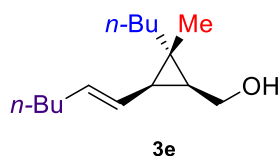

**(((1S\*,2S\*,3R\*)-2-butyl-3-((E)-hex-1-en-1-yl)-2-methylcyclopropyl)methanol (3e).** From **1a** (11.8 mmol scale) and **2c**. Yield = 1959 mg (74%). Colorless oil. *E/Z* > 99:1. *dr* > 95:5:0:0. <sup>1</sup>H NMR (400 MHz, CDCl<sub>3</sub>) δ 5.61 (dt, *J* = 14.9, 6.8 Hz, 1H), 5.21 (ddt, *J* = 15.1, 9.3, 1.3 Hz, 1H), 3.78 – 3.59 (m, 2H), 2.01 (q, *J* = 6.9 Hz, 2H), 1.43 – 1.12 (m, 11H), 1.04 (s, 3H), 1.03 (q, *J* = 8.0 Hz, 1H), 0.88 (dd, *J* = 7.1, 6.6 Hz, 6H). <sup>13</sup>C NMR (101 MHz, CDCl<sub>3</sub>) δ 133.0, 125.1, 60.4, 42.5, 32.7, 31.9, 30.9, 29.6, 28.7, 25.3, 22.9, 22.2, 14.2, 14.0, 12.9. HRMS (TOF-MS ES<sup>+</sup>) [M+H]<sup>+</sup>, calculated for C<sub>15</sub>H<sub>29</sub>O, 225.2218; found 225.2220.

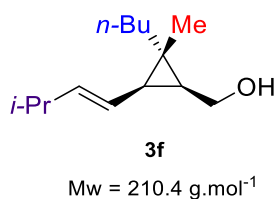

**((1S\*,2S\*,3R\*)-2-butyl-2-methyl-3-((E)-3-methylbut-1-en-1-yl)cyclopropyl)methanol (3f).** From **1a** (4 mmol scale) and **2d**. Yield = 564 mg (67%). Colorless oil. *E/Z* > 99:1. dr > 95:5:0:0. <sup>1</sup>H NMR (400 MHz, CDCl<sub>3</sub>) δ 5.52 (dd, *J* = 15.3, 6.7 Hz, 1H), 5.10 (ddd, *J* = 15.3, 9.3, 1.3 Hz, 1H), 3.73 – 3.52 (m, 2H), 2.20 (dq, *J* = 13.4, 6.7, 1.2 Hz, 1H), 1.36 – 1.03 (m, 7H), 0.97 (s, 3H), 0.96 – 0.92 (m, 1H), 0.91 (d, *J* = 1.7 Hz, 3H), 0.89 (d, *J* = 1.7 Hz, 3H), 0.82 (t, *J* = 7.0 Hz, 3H). <sup>13</sup>C NMR (101 MHz, CDCl<sub>3</sub>) δ 140.3, 122.1, 60.5, 42.5, 31.5, 30.8, 29.6, 28.7, 25.3, 22.9, 22.8, 22.8, 14.2, 12.9. HRMS (APCI ES<sup>+</sup>) [M-OH]<sup>+</sup>, calculated for C<sub>14</sub>H<sub>25</sub>, 193.1951; found 193.2000.

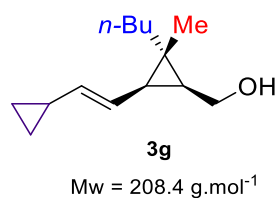

**((1S\*,2S\*,3R\*)-2-butyl-3-((E)-2-cyclopropylvinyl)-2-methylcyclopropyl)methanol (3g).** From **1a** (2.1 mmol scale) and **2e**. Yield = 178 mg (40%). Colorless oil. *E/Z* > 99:1. dr > 95:5:0:0. <sup>1</sup>H NMR (400 MHz, CDCl<sub>3</sub>) δ 5.32 (dd, *J* = 15.1, 9.5 Hz, 1H), 5.12 (dd, *J* = 15.1, 8.7 Hz, 1H), 3.77 – 3.67 (m, 2H), 1.48 – 1.10 (m, 7H), 1.05 (s, 3H), 1.10 – 0.97 (m, 1H), 0.95 – 0.80 (m, 1H), 0.88 (t, *J* = 7.0 Hz, 1H), 0.67 (dd, *J* = 8.1, 1.9 Hz, 2H), 0.39 – 0.23 (m, 2H). <sup>13</sup>C NMR (101 MHz, CDCl<sub>3</sub>) δ 136.2, 123.0, 60.4, 42.5, 31.0, 29.8, 28.7, 25.4, 22.9, 14.9, 14.2, 12.9, 6.7, 6.7. HRMS (APCI ES<sup>+</sup>) [M-OH]<sup>+</sup>, calculated for C<sub>14</sub>H<sub>25</sub>, 191.1794; found 191.1812.

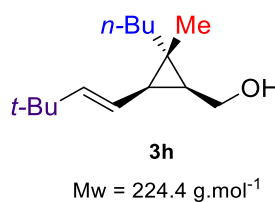

**((1S\*,2S\*,3R\*)-2-butyl-3-((E)-3,3-dimethylbut-1-en-1-yl)-2-methylcyclopropyl)methanol (3h).** From **1a** (4 mmol scale) and **2f**. Yield = 606 mg (68%). Colorless oil. *E/Z* > 99:1. dr > 95:5:0:0. <sup>1</sup>H NMR (400 MHz, CDCl<sub>3</sub>) δ 5.66 (dd, *J* = 15.5, 0.6 Hz, 1H), 5.12 (dd, *J* = 15.5, 9.1 Hz, 1H), 3.70 (ddd, *J* = 8.0, 5.8, 2.3 Hz, 2H), 1.42 – 1.09 (m, 7H), 1.04 (s, 3H), 1.08 – 1.01 (m, 1H), 0.99 (s, 9H), 0.88 (td, *J* = 7.0, 2.3 Hz, 3H). <sup>13</sup>C NMR (101 MHz, CDCl<sub>3</sub>) δ 144.2, 119.6, 60.5, 42.5, 33.3, 30.7, 29.8, 29.6, 28.7, 25.3, 22.9, 14.2, 12.9. HRMS (APCI ES<sup>+</sup>) [M-OH]<sup>+</sup>, calculated for C<sub>15</sub>H<sub>27</sub>, 207.2004; found 207.2113.



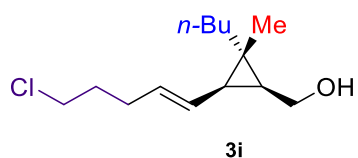

$M_w = 244.8 \text{ g.mol}^{-1}$

**((1S\*,2S\*,3R\*)-2-butyl-3-((E)-5-chloropent-1-en-1-yl)-2-**

**methylcyclopropyl)methanol (3i).** From **1a** (4.6 mmol scale)

and **2g**. Yield = 614 mg (54%). Colorless oil. *E/Z* > 99:1. dr >

95:5:0:0.  $^1\text{H NMR}$  (400 MHz,  $\text{CDCl}_3$ )  $\delta$  5.55 (dt,  $J = 14.3, 6.9$  Hz, 1H), 5.28 (dd,  $J = 15.1, 9.4$  Hz, 1H), 3.69 (qd,  $J = 11.6, 7.9$  Hz, 2H), 3.52 (t,  $J = 6.6$  Hz, 2H), 2.17 (q,  $J = 7.0$  Hz, 2H), 1.86 – 1.77 (m, 2H), 1.45 – 1.10 (m, 7H), 1.08 – 1.00 (m, 1H), 1.03 (s, 3H), 0.87 (t,  $J = 7.0$  Hz, 3H).  $^{13}\text{C NMR}$  (101 MHz,  $\text{CDCl}_3$ )  $\delta$  130.4, 127.2, 60.3, 44.4, 42.5, 32.3, 31.0, 30.0, 29.6, 28.7, 25.4, 22.8, 14.2, 12.9. **HRMS** (APCI  $\text{ES}^+$ )  $[\text{M}+\text{Na}]^+$ , calculated for  $\text{C}_{14}\text{H}_{27}\text{OCINa}$ , 267.1492; found 267.2316.

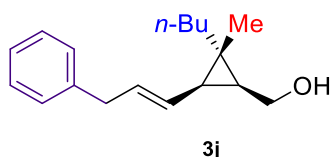

$M_w = 258.4 \text{ g.mol}^{-1}$

**((1S\*,2S\*,3R\*)-2-butyl-2-methyl-3-((E)-3-phenylprop-1-en-1-**

**yl)cyclopropyl)methanol (3j).** From **1a** (3.3 mmol scale) and **2h**.

Yield = 442 mg (52%). Colorless oil. *E/Z* > 99:1. dr > 95:5:0:0.  $^1\text{H}$

$\text{NMR}$  (400 MHz,  $\text{CDCl}_3$ )  $\delta$  7.29 (t,  $J = 7.4$  Hz, 2H), 7.19 (t,  $J = 8.7$  Hz, 1H), 7.18 (d,  $J = 8.1$  Hz, 2H), 5.77 (dt,  $J = 14.3, 6.9$  Hz, 1H), 5.33 (ddt,  $J = 15.0, 9.4, 1.3$  Hz, 1H), 3.72 (dq,  $J = 3.8, 8.4$  Hz, 2H), 3.37 (d,  $J = 6.9$  Hz, 2H), 1.42 (t,  $J = 9.2$  Hz, 1H), 1.38 – 1.13 (m, 6H), 1.07 (q,  $J = 7.9$  Hz, 1H), 1.06 (s, 3H), 0.89 (t,  $J = 7.0$  Hz, 3H).  $^{13}\text{C NMR}$  (101 MHz,  $\text{CDCl}_3$ )  $\delta$  140.9, 131.2, 128.5, 128.4, 127.1, 126.0, 60.4, 42.5, 39.4, 31.1, 29.6, 28.7, 25.5, 22.9, 14.2, 13.0. **HRMS** (APCI  $\text{ES}^+$ )  $[\text{M}-\text{H}_2\text{O}+\text{Na}]^+$ , calculated for  $\text{C}_{18}\text{H}_{24}\text{Na}$ , 263.1776; found 263.0227.

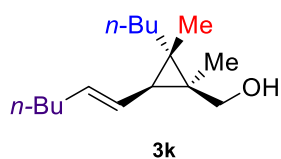

$M_w = 238.4 \text{ g.mol}^{-1}$

**((1S\*,2S\*,3S\*)-2-butyl-3-((E)-hex-1-en-1-yl)-1,2-**

**dimethylcyclopropyl)methanol (3k).** From **1d** (4 mmol scale) and **2c**.

Yield = 326 mg (34%). Colorless oil. *E/Z* > 99:1. dr > 95:5:0:0.  $^1\text{H}$

$\text{NMR}$  (400 MHz,  $\text{CDCl}_3$ )  $\delta$  5.51 (dt,  $J = 14.7, 6.8$  Hz, 1H), 5.18 (dd,  $J = 15.1, 9.3$  Hz, 1H), 3.57 (qd,  $J = 11.5, 5.9$  Hz, 2H), 1.94 (q,  $J = 6.7$  Hz, 2H), 1.44 – 1.12 (m, 14H), 1.02 (s, 3H), 1.00 (dd,  $J = 14.6, 7.8$  Hz, 5H).  $^{13}\text{C NMR}$  (101 MHz,  $\text{CDCl}_3$ )  $\delta$  132.9, 125.8, 65.8, 37.5, 37.2, 32.7, 31.9, 31.1, 29.5, 29.2, 23.1, 22.2, 18.4, 14.3, 14.2, 14.0. **HRMS** (APCI  $\text{ES}^+$ )  $[\text{M}-\text{OH}]^+$ , calculated for  $\text{C}_{16}\text{H}_{29}$ , 221.2264; found 221.2280.

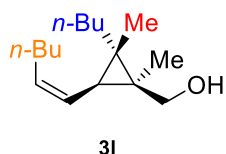

$M_w = 238.4 \text{ g}\cdot\text{mol}^{-1}$

**((1S\*,2S\*,3S\*)-2-butyl-3-((Z)-hex-1-en-1-yl)-1,2-**

**dimethylcyclopropyl)methanol (3l).** From **1d** (6 mmol scale) and **2b**.

Yield = 608 mg (43%). Colorless oil. *Z/E* > 99:1. *dr* > 95:5:0:0.  $^1\text{H NMR}$

(400 MHz,  $\text{CDCl}_3$ )  $\delta$  5.45 (dtd,  $J = 10.8, 7.3, 1.2$  Hz, 1H), 5.17 (ddt,  $J = 10.5, 9.0, 1.5$  Hz, 1H), 3.54 (qd,  $J = 11.6, 5.7$  Hz, 2H), 2.09 – 1.95 (m, 2H), 1.47 – 1.13 (m, 13H), 1.11 (dd,  $J = 9.0, 0.7$  Hz, 1H), 1.01 (s, 3H), 0.84 (td,  $J = 7.1, 1.8$  Hz, 6H).  $^{13}\text{C NMR}$  (101 MHz,  $\text{CDCl}_3$ )  $\delta$  132.7, 125.0, 65.8, 37.6, 32.7, 31.9, 31.4, 29.8, 29.4, 27.6, 23.1, 22.4, 18.5, 14.2, 14.2, 14.1. **HRMS** (APCI  $\text{ES}^+$ )  $[\text{M-OH}]^+$ , calculated for  $\text{C}_{16}\text{H}_{29}$ , 221.2264; found 221.2294.

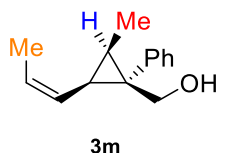

$M_w = 202.3 \text{ g}\cdot\text{mol}^{-1}$

**((1R\*,2R\*,3S\*)-2-methyl-1-phenyl-3-((Z)-prop-1-en-1-**

**yl)cyclopropyl)methanol (3m).** From **1e** (12 mmol scale) and **2a**. Yield =

653 mg (27%). Colorless oil. *Z/E* > 99:1. *dr* > 95:5:0:0.  $^1\text{H NMR}$  (400 MHz,

$\text{CDCl}_3$ )  $\delta$  7.32 (dd,  $J = 8.1, 1.1$  Hz, 2H), 7.26 (t,  $J = 7.6$  Hz, 2H), 7.16 (t,  $J = 7.2$  Hz, 1H), 5.68 (dq,  $J = 10.8, 6.8, 1.2$  Hz, 1H), 5.35 (ddq,  $J = 10.5, 9.1, 1.6$  Hz, 1H), 3.95 – 3.70 (m, 2H), 1.95 (t,  $J = 9.0$  Hz, 1H), 1.72 (dd,  $J = 6.8, 1.7$  Hz, 3H), 1.53 (dq,  $J = 9.0, 6.6$  Hz, 1H), 1.21 (d,  $J = 6.7$  Hz, 3H).  $^{13}\text{C NMR}$  (101 MHz,  $\text{CDCl}_3$ )  $\delta$  145.4, 129.0, 128.6, 127.9, 126.6, 124.3, 63.4, 36.3, 25.7, 23.5, 13.6, 9.0.

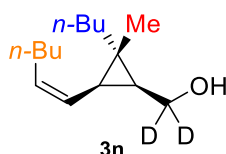

$M_w = 226.4 \text{ g}\cdot\text{mol}^{-1}$

**((1S\*,2S\*,3R\*)-2-butyl-3-((Z)-hex-1-en-1-yl)-2-**

**methylcyclopropyl)methanol-D<sub>2</sub>-ol (3n).** From **1a** (0.5 mmol scale) and **2b**.

Yield = 59 mg (57%). Colorless oil. *Z/E* > 99:1. *dr* > 95:5:0:0.  $^1\text{H NMR}$

(400 MHz,  $\text{CDCl}_3$ )  $\delta$  5.52 (dtd,  $J = 10.8, 7.3, 1.1$  Hz, 1H), 5.18 (ddt,  $J = 10.8, 9.3, 1.5$  Hz, 1H), 2.18 – 2.07 (m, 2H), 1.50 (td,  $J = 9.1, 1.1$  Hz, 1H), 1.42 – 1.18 (m, 11H), 1.09 (dd,  $J = 7.4, 2.8$  Hz, 2H), 1.03 (s, 3H), 0.94 – 0.82 (m, 6H).  $^{13}\text{C NMR}$  (101 MHz,  $\text{CDCl}_3$ )  $\delta$  132.8, 124.3, 42.6, 31.9, 30.9, 28.8, 27.5, 25.5, 25.1, 22.9, 22.4, 14.2, 14.1, 12.9. **HRMS** (APCI  $\text{ES}^+$ )  $[\text{M-OD}]^+$ , calculated for  $\text{C}_{15}\text{H}_{26}\text{D}$ , 209.2254; found 209.2280.

### Procedure B (3o-v)

In a flamed-dried three-neck flask under Ar, CuI (10 mol%) and a cyclopropene **3** (1 equiv) were dissolved into Et<sub>2</sub>O (8 mL / mmol substrate) and this solution was cooled down to -45°C. Then, the Grignard reagent (1.5 equiv, in solution in Et<sub>2</sub>O) was added dropwise and the resulting solution was let to stir from -35°C to -25°C (conversion monitored by TLC and/or GC). Following the complete conversion of **3**, the reactional mixture was then cooled to -50°C and a solution of flame-dried ZnBr<sub>2</sub> (1 M in THF, 1.5 equiv.) was slowly added and the resulting white suspension was let to warm-up until -20°C (*c.a.* 1.5 h) under vigorous stirring. Then, in a separate flask, [Pd(PPh<sub>3</sub>)<sub>4</sub>] (5 mol%) and the vinylhalide **2** (1.2 equiv) were dissolved into DMF (4 mL / mmol cyclopropene) and transferred to the reactional mixture at -20°C. The resulting orange suspension was heated until 75°C and stirred overnight (monitored by GC). The reaction was quenched with brine and the aqueous phase was extracted with Et<sub>2</sub>O three times. The combined organic phases were dried over anhydrous MgSO<sub>4</sub> and concentrated under reduced pressure. A column chromatography (gradient eluent: 100% hexane to 2% Et<sub>2</sub>O/hexane, stain: phosphomolybdic acid solution) afforded the desired vinylcyclopropane ester as the major product. In all cases, remaining hydrolysed cyclopropane derivative (*c.a.* 5-10%) could not be avoided and this mixture was directly engaged into the next reduction step.

In a flamed dried three-neck flask under Ar, a solution of the vinylicyclopropylcarbinol ester (1 equiv.) in THF (5 mL/mmol substrate) was slowly added to a suspension of LiAlH<sub>4</sub> (3 equiv.) in THF (5 mL/mmol substrate) under stirring at 0°C. After completion of the reaction, the reactional mixture was quenched with EtOAc, then carefully a saturated aqueous solution of Rochelle salt (5 mL/mmol substrate) was added and the suspension was vigorously stirred for 1h at 0°C. The phases were separated and the aqueous phase was extracted with Et<sub>2</sub>O three times. The combined organic phases were dried over anhydrous MgSO<sub>4</sub> and concentrated under reduced pressure. A column chromatography (gradient eluent: 10 – 20% Et<sub>2</sub>O/hexane) afforded the desired alcohol as a pure compound.

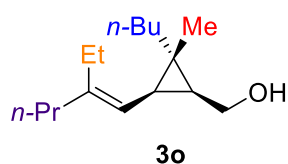

**((1S\*,2S\*,3R\*)-2-butyl-3-((E)-2-ethylpent-1-en-1-yl)-2-methylcyclopropyl)methanol (3o).** From **1a** (10 mmol scale) and **2j**. Yield = 1039 mg (44%). Colorless oil. *E/Z* > 99:1. *dr* = 98:2:0:0. <sup>1</sup>H NMR (400 MHz, CDCl<sub>3</sub>) δ 4.89 (d, *J* = 8.5 Hz, 1H), 3.67 – 3.60 (m, 2H), 2.19 – 2.02 (m, 2H), 1.97 (t, *J* = 7.4 Hz, 2H), 1.44 – 1.11 (m, 11H), 0.98 (m, 8H), 0.86 (m,

6H).  $^{13}\text{C}$  NMR (101 MHz,  $\text{CDCl}_3$ )  $\delta$  144.6, 118.3, 60.4, 42.7, 38.9, 30.5, 28.8, 25.2, 25.0, 23.5, 22.9, 21.3, 14.1, 13.8, 13.0, 12.8. HRMS (TOF-MS  $\text{ES}^+$ )  $[\text{M}+\text{Na}]^+$ , calculated for  $\text{C}_{16}\text{H}_{30}\text{ONa}$ ; 261.2194; found 261.2189.

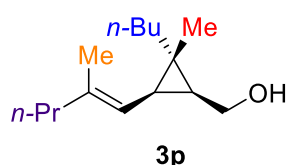

**3p**  
 $M_w = 224.4 \text{ g}\cdot\text{mol}^{-1}$

**((1S\*,2S\*,3R\*)-2-butyl-2-methyl-3-((E)-2-methylpent-1-en-1-yl)cyclopropyl)methanol (3p)**. From **1a** (15 mmol scale) and **2h**. Yield = 1895 mg (57%). Colorless oil.  $E/Z > 99:1$ . dr = 98:2:0:0.  $^1\text{H}$  NMR (400 MHz,  $\text{CDCl}_3$ )  $\delta$  4.92 (dd,  $J = 8.0, 1.1$  Hz, 1H), 3.59 (d,  $J = 7.7$  Hz, 2H), 1.94 (t,  $J = 7.4$  Hz, 2H), 1.76 (bs, 1H), 1.63 (s, 3H), 1.44 – 1.13 (m, 9H), 1.04 – 0.97 (m, 1H), 0.96 (s, 3H), 0.83 (m, 6H).  $^{13}\text{C}$  NMR (101 MHz,  $\text{CDCl}_3$ )  $\delta$  138.6, 118.9, 60.2, 42.6, 41.8, 30.3, 28.8, 25.5, 24.8, 22.8, 21.0, 16.4, 14.1, 13.5, 12.8. HRMS (TOF-MS  $\text{ES}^+$ )  $[\text{M}+\text{Na}]^+$ , calculated for  $\text{C}_{15}\text{H}_{28}\text{ONa}$ ; 247.2037; found 247.2034.

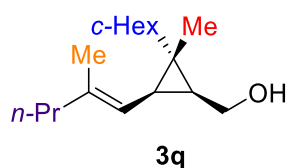

**3q**  
 $M_w = 250.4 \text{ g}\cdot\text{mol}^{-1}$

**((1S\*,2S\*,3R\*)-2-cyclohexyl-2-methyl-3-((E)-2-methylpent-1-en-1-yl)cyclopropyl)methanol (3q)**. From **1c** (3 mmol scale) and **2h**. Yield = 340 mg (46%). Colorless oil.  $E/Z > 99:1$ . dr = 98:2:0:0.  $^1\text{H}$  NMR (400 MHz,  $\text{CDCl}_3$ )  $\delta$  4.90 (dd,  $J = 8.0, 1.1$  Hz, 1H), 3.68 – 3.50 (m, 2H), 1.94 – 1.86 (m, 3H), 1.78 – 1.66 (m, 2H), 1.62 (t,  $J = 6.6$  Hz, 6H), 1.34 (m, 3H), 1.24 – 1.01 (m, 6H), 0.93 (m, 1H), 0.81 (m, 6H), 0.41 (m, 1H).  $^{13}\text{C}$  NMR (101 MHz,  $\text{CDCl}_3$ )  $\delta$  138.3, 119.0, 59.9, 50.4, 41.9, 30.4, 29.6, 29.4, 29.2, 26.9, 26.8, 26.6, 25.5, 21.0, 16.4, 13.5, 9.0. HRMS (TOF-MS  $\text{ES}^+$ )  $[\text{M}+\text{H}]^+$ , calculated for  $\text{C}_{17}\text{H}_{31}\text{O}$ ; 251.2375; found 251.2366.

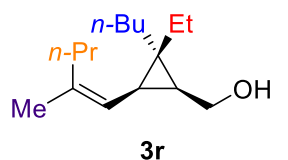

**3r**  
 $M_w = 238.4 \text{ g}\cdot\text{mol}^{-1}$

**((1S\*,2S\*,3R\*)-2-butyl-2-ethyl-3-((Z)-2-methylpent-1-en-1-yl)cyclopropyl)methanol (3r)**. From **1a** (3 mmol scale) and **2i**. Yield = 239 mg (34%). Colorless oil.  $E/Z > 99:1$ . dr = 98:2:0:0.  $^1\text{H}$  NMR (400 MHz,  $\text{CDCl}_3$ )  $\delta$  5.00 (d,  $J = 9.1$  Hz, 1H), 3.79 – 3.70 (m, 1H), 3.69 – 3.58 (m, 1H), 2.19 – 1.98 (m, 2H), 1.69 (s, 3H), 1.52 – 1.13 (m, 10H), 1.09 – 0.98 (m, 1H), 0.96 – 0.83 (m, 9H).  $^{13}\text{C}$  NMR (101 MHz,  $\text{CDCl}_3$ )  $\delta$  138.4, 119.3, 60.1, 38.1, 34.3, 31.4, 30.0, 28.3, 25.6, 23.7, 22.9, 21.1, 18.9, 14.2, 14.1, 10.6. HRMS (TOF-MS  $\text{ES}^+$ )  $[\text{M}+\text{Na}]^+$ , calculated for  $\text{C}_{16}\text{H}_{30}\text{ONa}$ ; 261.2194; found 261.2211.

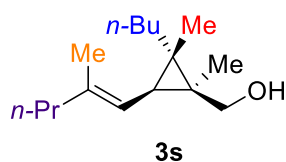

**((1S\*,2S\*,3S\*)-2-butyl-1,2-dimethyl-3-((E)-2-methylpent-1-en-1-yl)cyclopropyl)methanol (3s).** From **1d** (3 mmol scale) and **2h**. Yield = 285 mg (57%). Colorless oil.  $E/Z > 99:1$ . dr = 95:5:0:0.  $^1\text{H NMR}$  (400 MHz,  $\text{CDCl}_3$ )  $\delta$  5.05 – 4.94 (m, 1H), 3.57 (q,  $J = 11.6$  Hz, 2H), 1.97 (t,  $J = 7.5$  Hz, 2H), 1.64 (d,  $J = 1.0$  Hz, 3H), 1.49 – 1.22 (m, 12H), 1.08 – 1.03 (m, 4H), 0.92 – 0.82 (m, 6H).  $^{13}\text{C NMR}$  (101 MHz,  $\text{CDCl}_3$ )  $\delta$  138.9, 119.8, 66.0, 41.9, 37.8, 33.4, 30.7, 29.5, 29.2, 23.2, 21.2, 18.6, 16.8, 14.4, 14.3, 13.8. **HRMS** (TOF-MS  $\text{ES}^+$ )  $[\text{M}+\text{Na}]^+$ , calculated for  $\text{C}_{15}\text{H}_{28}\text{ONa}$ ; 247.2037; found 247.2034.

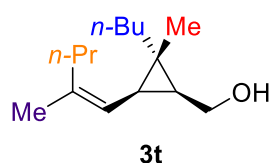

**((1S\*,2S\*,3R\*)-2-butyl-2-methyl-3-((Z)-2-methylpent-1-en-1-yl)cyclopropyl)methanol (3t).** From **1a** (3 mmol scale) and vinyl halide **2i**. Yield = 233 mg (35%). Colorless oil.  $Z/E > 99:1$ . dr = 98:2:0:0.  $^1\text{H NMR}$  (400 MHz,  $\text{CDCl}_3$ )  $\delta$  4.92 (d,  $J = 8.4$  Hz, 1H), 3.60 (d,  $J = 7.7$  Hz, 2H), 2.12 – 1.96 (m, 2H), 1.81 (bs, 1H), 1.66 (s, 3H), 1.48 – 1.12 (m, 9H), 1.03 – 0.92 (m, 4H), 0.86 (m, 6H).  $^{13}\text{C NMR}$  (101 MHz,  $\text{CDCl}_3$ )  $\delta$  138.7, 119.5, 60.1, 42.7, 34.3, 30.4, 28.7, 25.4, 24.9, 23.5, 22.8, 21.0, 14.1, 14.0, 12.8. **HRMS** (TOF-MS  $\text{ES}^+$ )  $[\text{M}+\text{Na}]^+$ , calculated for  $\text{C}_{15}\text{H}_{28}\text{ONa}$ ; 247.2037; found 247.2045.

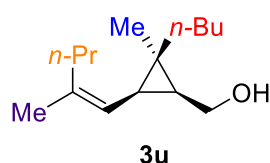

**((1S\*,2R\*,3R\*)-2-butyl-2-methyl-3-((Z)-2-methylpent-1-en-1-yl)cyclopropyl)methanol (3u).** From **1a** (3 mmol scale) and **2i**. Yield = 147 mg (22%). Colorless oil.  $Z/E > 99:1$ . dr = 98:2:0:0.  $^1\text{H NMR}$  (400 MHz,  $\text{CDCl}_3$ )  $\delta$  5.00 (d,  $J = 8.8$  Hz, 1H), 3.76 (d,  $J = 6.9$  Hz, 1H), 3.61 (t,  $J = 10.0$  Hz, 1H), 2.23 – 1.97 (m, 2H), 1.70 (s, 3H), 1.52 – 1.15 (m, 11H), 1.07 (s, 3H), 0.98 – 0.82 (m, 6H).  $^{13}\text{C NMR}$  (101 MHz,  $\text{CDCl}_3$ )  $\delta$  138.7, 119.6, 60.4, 34.5, 32.2, 29.7, 29.1, 26.5, 26.2, 25.5, 23.9, 23.3, 21.2, 14.3, 14.2. **HRMS** (TOF-MS  $\text{ES}^+$ )  $[\text{M}+\text{Na}]^+$ , calculated for  $\text{C}_{15}\text{H}_{28}\text{ONa}$ ; 247.2037; found 247.2033.

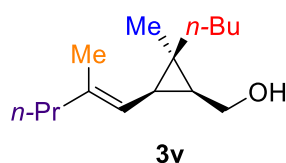

**((1S\*,2R\*,3R\*)-2-butyl-2-methyl-3-((E)-2-methylpent-1-en-1-yl)cyclopropyl)methanol (3v).** From **1a** (3 mmol scale) and **2h**. Yield = 206 mg (31%). Colorless liquid.  $E/Z > 99:1$ . dr = 95:5:0:0.  $^1\text{H NMR}$  (400 MHz,  $\text{CDCl}_3$ )  $\delta$  4.98 (dd,  $J = 8.6, 1.1$  Hz, 1H), 3.75 (dd,  $J = 11.6,$

7.0 Hz, 1H), 3.59 (dd,  $J = 11.5, 8.6$  Hz, 1H), 1.96 (t,  $J = 7.4$  Hz, 2H), 1.66 (s, 3H), 1.47 – 1.16 (m, 12H), 1.13 – 0.98 (m, 4H), 0.92 – 0.78 (m, 6H).  $^{13}\text{C}$  NMR (101 MHz,  $\text{CDCl}_3$ )  $\delta$  138.5, 119.1, 60.3, 42.0, 32.0, 29.7, 29.0, 26.5, 26.2, 25.3, 23.3, 21.2, 16.6, 14.2, 13.7. HRMS (TOF-MS ES<sup>+</sup>)  $[\text{M}+\text{Na}]^+$ , calculated for  $\text{C}_{15}\text{H}_{28}\text{ONa}$ ; 247.2037; found 247.2045.

## General procedure for the Heck arylation of vinylcyclopropylcarbinols with arylboronic acids

In a dry one-neck flask under O<sub>2</sub> (balloon, 1 atm), 5-(2-pyridyl)-1,3-oxazole (9 mol%), [Pd(MeCN)<sub>2</sub>(OTs)<sub>2</sub>] (7.5 mol%), Cu(OTf)<sub>2</sub> (5 mol%), molecular sieves 3 Å (100% w/w substrate) and vinylcyclopropyl carbinol (1 equiv., 0.25 mmol except mentioned otherwise) were dissolved into DMA (8 mL/mmol substrate). The corresponding arylboronic acid (3 equiv.) was then rapidly poured into the reaction mixture which was set on stirring at 55°C for 18 h. After completion of the reaction, the reaction mixture was diluted with brine and EtOAc. The phases were separated and the aqueous phase was successively washed three times with EtOAc. The combined organic phases were then dried over anhydrous MgSO<sub>4</sub> and concentrated under reduced pressure. A column chromatography (typically, gradient eluent 100% hexane / 5% Et<sub>2</sub>O/hexane) afforded the desired aldehyde.

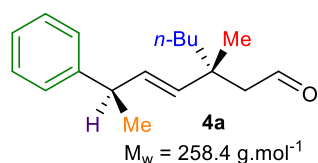

**(3R\*,6R\*,4E)-3-butyl-3-methyl-6-phenylhept-4-enal (4a).** From **3c** and phenylboronic acid. Yield = 50 mg (78%). Colorless liquid. *E/Z* > 99:1. dr > 95:5. <sup>1</sup>H NMR (400 MHz, CDCl<sub>3</sub>) δ 9.72 (t, *J* = 3.2 Hz, 1H), 7.35 – 7.27 (m, 2H), 7.22 – 7.16 (m, 3H), 5.57 (dd, *J* = 15.8, 6.4 Hz, 1H), 5.49 (d, *J* = 16.2 Hz, 1H), 3.47 (p, *J* = 6.8 Hz, 1H), 2.33 (ddd, *J* = 35.7, 14.7, 3.1 Hz, 3H), 1.37 (dd, *J* = 17.3, 7.4 Hz, 6H), 1.35 (d, *J* = 7.0 Hz, 4H), 1.31 – 1.15 (m, 7H), 1.12 (s, 4H), 0.88 (t, *J* = 7.1 Hz, 5H). <sup>13</sup>C NMR (101 MHz, CDCl<sub>3</sub>) δ 203.8, 146.0, 135.9, 133.5, 128.4, 127.1, 126.1, 53.7, 42.3, 41.8, 38.1, 26.1, 24.2, 23.2, 21.5, 14.0. HRMS (APCI-MS ES+) [M+H]<sup>+</sup>, calculated for C<sub>18</sub>H<sub>27</sub>O; 259.2062; found 259.2015.

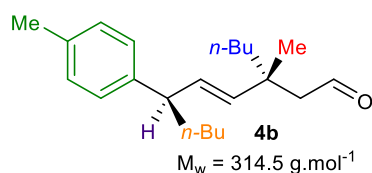

**(3R\*,6R\*,4E)-3-butyl-3-methyl-6-(*p*-tolyl)dec-4-enal (4b).** From **3d** and *p*-tolylboronic acid. Yield = 49 mg (63%). Colorless liquid. *E/Z* > 99:1. dr > 95:5. <sup>1</sup>H NMR (400 MHz, CDCl<sub>3</sub>) δ 9.70 (t, *J* = 3.2 Hz, 1H), 7.10 (d, *J* = 8.0 Hz, 2H), 7.05 (d, *J* = 8.1 Hz, 2H), 5.50 (d, *J* = 15.8 Hz, 1H), 5.45 (d, *J* = 15.6 Hz, 1H), 3.19 (dd, *J* = 13.6, 7.2 Hz, 1H), 2.36 (dd, *J* = 14.7, 2.8 Hz, 1H), 2.32 (s, 3H), 2.27 (dd, *J* = 14.7, 3.5 Hz, 1H), 1.65 (ddd, *J* = 9.3, 7.3, 2.4 Hz, 2H), 1.41 – 1.13 (m, 10H), 1.10 (s, 3H), 0.86 (t, *J* = 6.9 Hz, 6H). <sup>13</sup>C NMR (101 MHz, CDCl<sub>3</sub>) δ 204.0, 142.2, 136.5, 135.5, 132.8, 129.1, 127.3, 53.7, 48.4, 41.9,

38.2, 35.8, 29.9, 26.1, 24.3, 23.3, 22.7, 21.0, 14.1. **HRMS** (APCI-MS ES+)  $[M+H]^+$ , calculated for  $C_{22}H_{35}O$ ; 315.2682; found 315.2686.

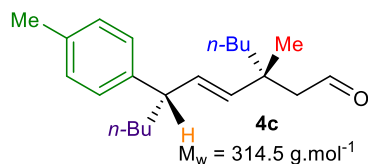

**(3R\*,6S\*,4E)-3-butyl-3-methyl-6-(p-tolyl)dec-4-enal (4c)**. From **3e** and *p*-tolylboronic acid. Yield = 36 mg (46%). Colorless liquid. *E/Z* > 99:1. *dr* > 95:5. **<sup>1</sup>H NMR** (400 MHz, CDCl<sub>3</sub>) δ 9.76 – 9.53 (m, 1H), 7.10 (d, *J* = 8.0 Hz, 2H), 7.04 (d, *J* = 8.1 Hz, 2H), 5.55 – 5.36 (m, 2H), 3.19 (dd, *J* = 12.9, 5.9 Hz, 1H), 2.32 (s, 3H), 2.29 (qd, *J* = 14.8, 3.2 Hz, 2H), 1.65 (ddd, *J* = 13.6, 7.0, 2.2 Hz, 2H), 1.46 – 1.13 (m, 10H), 1.10 (s, 3H), 0.92 – 0.84 (m, 6H). **<sup>13</sup>C NMR** (101 MHz, CDCl<sub>3</sub>) δ 204.0, 142.2, 136.5, 135.5, 132.9, 129.1, 127.32, 54.0, 48.5, 41.8, 38.2, 35.8, 29.9, 26.2, 24.0, 23.3, 22.7, 21.0, 14.1, 14.1. **HRMS** (APCI-MS ES+)  $[M+H]^+$ , calculated for  $C_{22}H_{35}O$ ; 315.2682; found 315.2688.

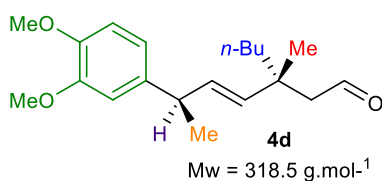

**(3R\*,6R\*,4E)-3-butyl-6-(3,4-dimethoxyphenyl)-3-methylhept-4-enal (4d)**. From **3c** and 3,4-dimethoxybenzeneboronic acid. Yield = 56 mg (70%). Colorless oil. *E/Z* > 99:1. *dr* > 95:5. **<sup>1</sup>H NMR** (400 MHz, CDCl<sub>3</sub>) δ 9.73 (t, *J* = 3.1 Hz, 1H), 6.81 (d, *J* = 8.2 Hz, 1H), 6.77 – 6.66 (m, 2H), 5.54 (dd, *J* = 15.8, 6.1 Hz, 1H), 5.47 (d, *J* = 16.1 Hz, 1H), 3.86 (s, 3H), 3.86 (s, 3H), 3.42 (dt, *J* = 13.4, 6.8 Hz, 1H), 2.33 (ddd, *J* = 35.6, 14.7, 3.1 Hz, 2H), 1.33 (d, *J* = 7.0 Hz, 3H), 1.46 – 1.15 (m, 6H), 1.13 (s, 3H), 0.87 (t, *J* = 7.0 Hz, 3H). **<sup>13</sup>C NMR** (101 MHz, CDCl<sub>3</sub>) δ 203.7, 148.8, 147.3, 138.6, 135.7, 133.7, 118.8, 111.2, 110.6, 55.9, 55.8, 53.8, 41.8, 38.1, 26.1, 24.1, 23.2, 21.5, 14.1. **HRMS** (APCI-MS ES+)  $[M+H]^+$ , calculated for  $C_{20}H_{31}O_3$ ; 319.2273; found 319.2267.

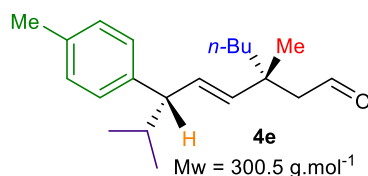

**(3R\*,6S\*,4E)-3-butyl-3,7-dimethyl-6-(p-tolyl)oct-4-enal (4e)**. From **3f** and *p*-tolylboronic acid. Yield = 45 mg (60%). Colorless liquid. *E/Z* > 99:1. *dr* = 89:11. **<sup>1</sup>H NMR** (400 MHz, CDCl<sub>3</sub>) δ 9.60 (dd, *J* = 3.6, 2.8 Hz, 1H), 7.08 (d, *J* = 7.9 Hz, 2H), 7.01 (d, *J* = 8.1 Hz, 2H), 5.56 (dd, *J* = 15.6, 8.7 Hz, 1H), 5.47 (d, *J* = 15.7 Hz, 1H), 2.86 (t, *J* = 8.6 Hz, 1H), 2.36 – 2.29 (dd, *J* = 14.8, 2.7 Hz, 1H), 2.31 (s, 3H), 2.23 (dd, *J* = 14.8, 3.7 Hz, 1H), 1.96 – 1.86 (m, 1H), 1.41 – 1.32 (m, 2H), 1.32 – 1.14 (m, 4H), 1.10 (s, 3H), 0.91 (d, *J* =



6.7 Hz, 3H), 0.87 (t,  $J = 7.1$  Hz, 3H), 0.76 (d,  $J = 6.6$  Hz, 3H).  $^{13}\text{C}$  NMR (101 MHz,  $\text{CDCl}_3$ )  $\delta$  204.1, 141.6, 137.5, 135.3, 131.4, 129.0, 127.6, 56.8, 53.9, 41.8, 38.3, 33.0, 26.2, 24.2, 23.3, 21.2, 21.0, 20.7, 14.1. **HRMS** (APCI-MS ES+)  $[\text{M}+\text{H}]^+$ , calculated for  $\text{C}_{21}\text{H}_{33}\text{O}$ ; 301.2526; found 301.2572.

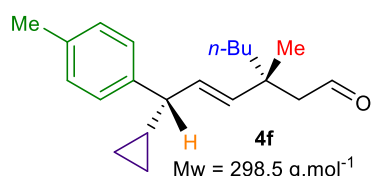

**(3R\*)-3-((3S\*,1E)-3-cyclopropyl-3-(*p*-tolyl)prop-1-en-1-yl)-3-methylheptanal (4f).** From **3g** and *p*-tolylboronic acid. Yield = 39 mg (52%). Colorless liquid.  $E/Z > 99:1$ .  $dr > 95:5$ .  $^1\text{H}$  NMR (400 MHz,  $\text{CDCl}_3$ )  $\delta$  9.71 (t,  $J = 3.2$  Hz, 1H), 7.19 – 7.10 (m, 4H), 5.56 (d,  $J = 2.8$  Hz, 2H), 2.57 (dt,  $J = 8.8, 2.9$  Hz, 1H), 2.34 (s, 3H), 2.45 – 2.23 (m, 2H), 1.46 – 1.35 (m, 2H), 1.34 – 1.19 (m, 4H), 1.13 (s, 3H), 1.03 (ddd,  $J = 11.9, 8.1, 3.2$  Hz, 1H), 0.90 (t,  $J = 7.0$  Hz, 3H), 0.64 – 0.48 (m, 2H), 0.29 – 0.15 (m, 2H).  $^{13}\text{C}$  NMR (101 MHz,  $\text{CDCl}_3$ )  $\delta$  204.0, 141.5, 136.9, 135.7, 131.6, 129.1, 127.6, 54.0, 52.5, 41.8, 38.3, 26.2, 24.1, 23.3, 21.1, 16.3, 14.1, 4.4. **HRMS** (APCI-MS ES+)  $[\text{M}+\text{H}]^+$ , calculated for  $\text{C}_{21}\text{H}_{31}\text{O}$ ; 299.2369; found 299.2379.

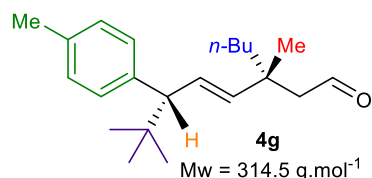

**(3R\*,6R\*,4E)-3-butyl-3,7,7-trimethyl-6-(*p*-tolyl)oct-4-enal (4g).** From **3h** and *p*-tolylboronic acid. Yield = 45 mg (50%). Colorless oil.  $E/Z > 99:1$ .  $dr = 91:9$ .  $^1\text{H}$  NMR (400 MHz,  $\text{CDCl}_3$ )  $\delta$  9.52 (dd,  $J = 3.5, 2.8$  Hz, 1H), 6.99 (d,  $J = 8.0$  Hz, 2H), 6.94 (d,  $J = 8.1$  Hz, 2H), 5.77 (dd,  $J = 15.6, 9.8$  Hz, 1H), 5.41 (d,  $J = 15.6$  Hz, 1H), 2.91 (d,  $J = 9.7$  Hz, 1H), 2.26 (dd,  $J = 10.7, 4.3$  Hz, 1H), 2.24 (s, 3H), 2.16 (dd,  $J = 14.8, 3.7$  Hz, 1H), 1.38 – 1.08 (m, 6H), 1.05 (s, 3H), 0.86 – 0.75 (m, 12H).  $^{13}\text{C}$  NMR (101 MHz,  $\text{CDCl}_3$ )  $\delta$  204.1, 140.1, 138.6, 135.3, 129.3, 129.0, 128.4, 59.8, 53.9, 41.7, 38.4, 34.1, 31.6, 28.1, 26.2, 24.3, 23.3, 22.7, 21.0, 14.2, 14.1. **HRMS** (APCI-MS ES+)  $[\text{M}+\text{Na}]^+$ , calculated for  $\text{C}_{22}\text{H}_{34}\text{ONa}$ ; 337.2507; found 337.2501.

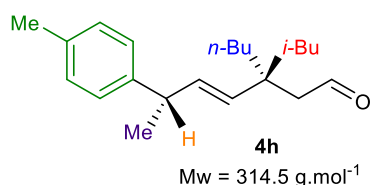

**(3S\*,6S\*,4E)-3-butyl-3-isobutyl-6-(*p*-tolyl)hept-4-enal (4h).** From **3b** and *p*-tolylboronic acid. Yield = 54 mg (69%). Colorless liquid.  $E/Z > 99:1$ .  $dr > 95:5$ .  $^1\text{H}$  NMR (400 MHz,  $\text{CDCl}_3$ )  $\delta$  9.74 (t,  $J = 3.1$  Hz, 1H), 7.12 (d,  $J = 8.2$  Hz, 2H), 7.08

(d,  $J = 8.2$  Hz, 2H), 5.50 (dd,  $J = 16.0, 6.3$  Hz, 1H), 5.43 (d,  $J = 16.3$  Hz, 1H), 3.46 (p,  $J = 6.8$  Hz, 1H), 2.39 (d,  $J = 3.1$  Hz, 3H), 2.33 (s, 3H), 1.75 – 1.58 (m, 2H), 1.53 – 1.41 (m, 2H), 1.40 – 1.32 (m, 5H), 1.31 – 1.14 (m, 3H), 0.89 (dt,  $J = 7.0, 4.0$  Hz, 9H).  $^{13}\text{C NMR}$  (101 MHz,  $\text{CDCl}_3$ )  $\delta$  204.0, 142.9, 136.3, 135.6, 133.5, 129.1, 127.0, 50.1, 47.8, 42.1, 41.4, 37.8, 25.8, 25.1, 25.1, 24.0, 23.3, 21.4, 21.0, 14.1 ( $\text{CH}_3$ ). **HRMS** (APCI-MS ES+)  $[\text{M}+\text{H}]^+$ , calculated for  $\text{C}_{22}\text{H}_{35}\text{O}$ ; 315.2681; found 315.2681.

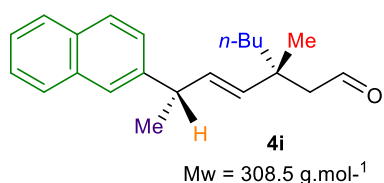

**(3R\*,6S\*,4E)-3-butyl-3-methyl-6-(2-naphthalenyl)hept-4-enal (4i)**. From **3a** and 2-naphthylboronic acid. Yield = 48 mg (61%). Colorless liquid.  $E/Z > 99:1$ . dr = 91:9.  $^1\text{H NMR}$  (400 MHz,  $\text{CDCl}_3$ )  $\delta$  9.71 (t,  $J = 3.1$  Hz, 1H), 7.83 – 7.76 (m, 3H),

7.63 (s, 1H), 7.52 – 7.39 (m, 2H), 7.33 (d,  $J = 8.5$  Hz, 1H), 5.64 (dd,  $J = 15.8, 6.4$  Hz, 1H), 5.54 (d,  $J = 15.9$  Hz, 1H), 3.64 (p,  $J = 6.9$  Hz, 1H), 2.38 (dd,  $J = 14.7, 2.8$  Hz, 1H), 2.29 (dd,  $J = 14.7, 3.5$  Hz, 1H), 1.45 (d,  $J = 7.0$  Hz, 3H), 1.50 – 1.35 (m, 2H), 1.34 – 1.18 (m, 4H), 1.14 (s, 3H), 0.90 (t,  $J = 7.0$  Hz, 3H).  $^{13}\text{C NMR}$  (101 MHz,  $\text{CDCl}_3$ )  $\delta$  203.8, 143.4, 136.3, 133.7, 133.5, 132.2, 128.0, 127.7, 127.6, 126.3, 126.0, 125.4, 125.1, 53.8, 42.4, 41.8, 38.2, 26.2, 24.2, 23.3, 21.4, 14.1. **HRMS** (APCI-MS ES+)  $[\text{M}+\text{H}]^+$ , calculated for  $\text{C}_{22}\text{H}_{29}\text{O}$ ; 309.2213; found 309.2273.

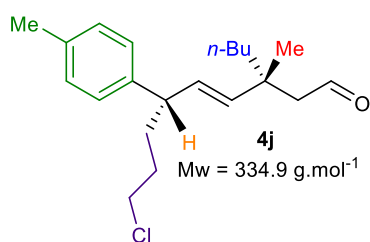

**(3R\*,6S\*,4E)-3-butyl-9-chloro-3-methyl-6-(p-tolyl)non-4-enal (4j)**. From **3i** and *p*-tolylboronic acid. Yield = 46 mg (55%). Colorless oil.  $E/Z > 99:1$ . dr > 95:5.  $^1\text{H NMR}$  (400 MHz,  $\text{CDCl}_3$ )  $\delta$  9.65 (dd,  $J = 3.3, 2.9$  Hz, 1H), 7.11 (d,  $J = 7.9$  Hz, 2H), 7.04 (d,  $J = 8.1$  Hz, 2H), 5.55 – 5.45 (m, 2H), 3.52 (dt,  $J = 6.4,$

3.1 Hz, 2H), 3.22 (dd,  $J = 7.1, 3.5$  Hz, 1H), 2.35 (dd,  $J = 15.0, 2.9$  Hz, 1H), 2.32 (s, 3H), 2.26 (dd,  $J = 14.8, 3.5$  Hz, 1H), 1.89 – 1.57 (m, 4H), 1.36 (s, 3H), 1.46 – 1.13 (m, 6H), 1.11 (s, 3H), 0.88 (t,  $J = 7.1$  Hz, 3H).  $^{13}\text{C NMR}$  (101 MHz,  $\text{CDCl}_3$ )  $\delta$  203.7, 141.2, 137.1, 135.9, 132.3, 129.3, 127.3, 53.8, 47.9, 45.1, 41.7, 38.3, 33.2, 30.8, 26.2, 24.0, 23.3, 21.0, 14.1. **HRMS** (APCI-MS ES+)  $[\text{M}+\text{H}]^+$ , calculated for  $\text{C}_{21}\text{H}_{34}\text{OCl}$ ; 337.2298; found 337.2264.

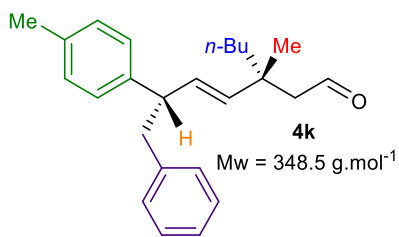

**(3R\*,6S\*,4E)-3-butyl-3-methyl-7-phenyl-6-(*p*-tolyl)hept-4-enal (4k).** From **3j** and *p*-tolylboronic acid. Yield = 52 mg (60%). Colorless oil. *E/Z* > 99:1. dr > 95:5. <sup>1</sup>H NMR (400 MHz, CDCl<sub>3</sub>) δ 9.49 (dd, *J* = 3.5, 2.9 Hz, 1H), 7.25 (t, *J* = 7.2 Hz, 2H), 7.16 (t, *J* = 7.3 Hz, 1H), 7.14 – 7.07 (m, 6H), 5.52

(dd, *J* = 15.7, 8.1 Hz, 1H), 5.32 (dd, *J* = 15.7, 0.7 Hz, 1H), 3.56 (td, *J* = 8.7, 6.2 Hz, 1H), 3.07 (dd, *J* = 13.5, 5.9 Hz, 1H), 2.92 (dd, *J* = 13.5, 9.4 Hz, 1H), 2.34 (s, 3H), 2.27 (dd, *J* = 14.7, 2.8 Hz, 1H), 2.17 (dd, *J* = 14.7, 3.6 Hz, 1H), 1.25 (ddd, *J* = 6.7, 5.5, 2.6 Hz, 2H), 1.22 – 1.17 (m, 2H), 1.03 (s, 3H), 1.11 – 0.92 (m, 2H), 0.85 (t, *J* = 7.3 Hz, 3H). <sup>13</sup>C NMR (101 MHz, CDCl<sub>3</sub>) δ 202.9, 140.3, 139.2, 136.6, 134.7, 130.3, 128.2, 128.1, 127.1, 126.2, 124.9, 52.7, 49.3, 41.8, 40.6, 37.0, 24.8, 23.0, 22.1, 20.0, 13.0. HRMS (APCI-MS ES+) [M+H]<sup>+</sup>, calculated for C<sub>25</sub>H<sub>33</sub>O; 349.2526; found 349.2575.

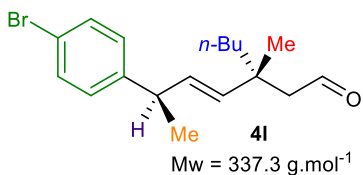

**(3R\*,6R\*,4E)-6-(4-bromophenyl)-3-butyl-3-methylhept-4-enal (4l).** From **3c** and 4-bromobenzeneboronic acid. Yield = 41 mg (49%). Orange oil. *E/Z* > 99:1. dr > 95:5. <sup>1</sup>H NMR (400 MHz, CDCl<sub>3</sub>) δ 9.71 (t, *J* = 3.1 Hz, 1H), 7.41 (d, *J* = 8.4 Hz, 2H),

7.05 (d, *J* = 8.3 Hz, 2H), 5.58 – 5.41 (m, 2H), 3.47 – 3.38 (m, 1H), 2.32 (qd, *J* = 14.7, 3.1 Hz, 2H), 1.32 (d, *J* = 7.0 Hz, 3H), 1.41 – 1.15 (m, 6H), 1.12 (s, 3H), 0.88 (t, *J* = 3.5 Hz, 3H). <sup>13</sup>C NMR (101 MHz, CDCl<sub>3</sub>) δ 203.6, 145.0, 136.5, 133.0, 131.5, 128.9, 119.8, 53.7, 41.8, 41.8, 38.2, 26.1, 24.1, 23.2, 21.4, 14.1. HRMS (APCI-MS ES+) [M+H]<sup>+</sup>, calculated for C<sub>18</sub>H<sub>26</sub>BrO; 337.1162; found 337.1192.

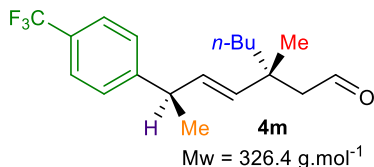

**(3R\*,6R\*,4E)-3-butyl-3-methyl-6-(4-(trifluoromethyl)phenyl)hept-4-enal (4m).** From **3c** and 4-trifluoromethylbenzeneboronic acid. Yield = 31 mg (38%). Colorless liquid. *E/Z* > 99:1. dr > 95:5. <sup>1</sup>H NMR (400 MHz,

CDCl<sub>3</sub>) δ 9.72 (t, *J* = 3.1 Hz, 1H), 7.55 (d, *J* = 8.1 Hz, 2H), 7.29 (d, *J* = 8.4 Hz, 2H), 5.62 – 5.45 (m, 2H), 3.60 – 3.46 (m, 1H), 2.34 (qd, *J* = 14.7, 3.1 Hz, 2H), 1.38 (dd, *J* = 14.6, 7.5 Hz, 3H), 1.36 (d, *J* = 7.0 Hz, 4H), 1.32 – 1.14 (m, 4H), 1.13 (s, 3H), 0.87 (t, *J* = 7.1 Hz, 3H). <sup>13</sup>C NMR (101 MHz, CDCl<sub>3</sub>) δ 203.5, 150.1, 136.9, 132.6, 128.6, 128.3, 127.5, 125.7, 125.4 (q, *J* = 3.8

Hz, CF<sub>3</sub>), 123.0, 53.7, 42.0, 41.7, 38.2, 26.1, 24.1, 23.2, 21.4, 14.1. **HRMS** (APCI-MS ES+) [M+H]<sup>+</sup>, calculated for C<sub>19</sub>H<sub>26</sub>F<sub>3</sub>O; 327.1930; found 327.1969.

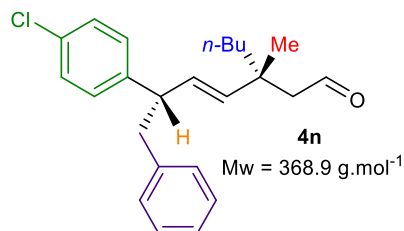

**(3R\*,6S\*,4E)-3-butyl-6-(4-chlorophenyl)-3-methyl-7-phenylhept-4-enal (4n)**. From **3j** and 4-chlorobenzeneboronic acid. Yield = 37 mg (40%). Colorless liquid. *E/Z* > 99:1. *dr* > 95:5. <sup>1</sup>H NMR (400 MHz, CDCl<sub>3</sub>) δ 9.42 (t, *J* = 3.1 Hz, 1H), 7.41 – 6.82 (m, 9H), 5.41 (dd, *J* = 15.7, 7.8 Hz, 1H), 5.26 (dd, *J* = 15.7, 0.7 Hz, 1H), 3.48 (dd, *J* = 15.2, 7.9 Hz, 1H), 2.93 (dd, *J* = 13.5, 6.6 Hz, 1H), 2.84 (dd, *J* = 13.4, 8.7 Hz, 1H), 2.19 (dd, *J* = 14.7, 2.8 Hz, 1H), 2.11 (dd, *J* = 14.7, 3.5 Hz, 1H), 1.24 – 1.05 (m, 6H), 0.96 (s, 3H), 0.77 (t, *J* = 7.3 Hz, 3H). <sup>13</sup>C NMR (101 MHz, CDCl<sub>3</sub>) δ 203.6, 142.8, 139.7, 138.2, 132.0, 130.8, 129.2, 128.9, 128.6, 128.2, 126.1, 53.7, 50.2, 42.7, 41.6, 38.2, 25.9, 24.0, 23.2, 14.1. **HRMS** (APCI-MS ES+) [M+H]<sup>+</sup>, calculated for C<sub>24</sub>H<sub>30</sub>ClO; 369.1980; found 369.2014.

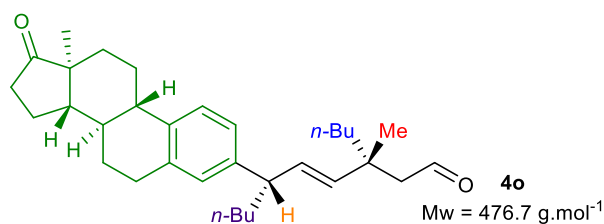

**(3R\*,6S\*,4E)-3-butyl-3-methyl-6-(17-oxoestra-1,3,5(10)-trienyl)dec-4-enal (4o)**. From **3e** and the boronic acid derived from estrone prepared according to a reported protocol.<sup>12</sup> Yield = 61 mg (51%). Colorless oil. *E/Z* > 99:1. *dr* = 2:1:0:0. Mixture of diastereoisomers: <sup>1</sup>H NMR (400 MHz, CDCl<sub>3</sub>) δ 9.7 (t, *J* = 3.1 Hz, 1H), 7.21 (d, *J* = 8.1 Hz, 1H), 6.94 (d, *J* = 8.1 Hz, 1H), 6.88 (s, 1H), 5.67 – 5.56 (m, 1H), 5.50 (d, *J* = 14.7 Hz, 1H), 5.45 (d, *J* = 15.9 Hz, 1H), 5.22 (dd, *J* = 15.2, 9.3 Hz, 1H), 3.78 – 3.63 (m, 1H), 3.16 (dd, *J* = 13.7, 6.8 Hz, 1H), 2.97 – 2.79 (m, 2H), 2.50 (dd, *J* = 18.7, 8.7 Hz, 1H), 2.30 (ddd, *J* = 18.3, 14.7, 3.1 Hz, 4H), 2.20 – 1.91 (m, 6H), 0.93 – 0.83 (m, 14H). <sup>13</sup>C NMR (101 MHz, CDCl<sub>3</sub>) δ 204.0, 142.8, 142.8, 137.4, 137.4, 136.6, 136.4, 133.0, 132.7, 128.0, 128.0, 125.4, 125.3, 125.1, 124.8, 124.8, 60.4, 54.0, 50.6, 48.4, 48.1, 44.4, 42.5, 41.8, 38.3, 38.2, 35.9, 35.8, 35.7, 32.7, 31.9, 31.7, 30.9, 30.0, 29.6, 29.5, 28.7, 26.6, 26.2, 25.7, 25.3, 24.0, 23.3, 22.9, 22.6, 22.2, 21.6, 14.2, 14.1, 14.1, 14.0, 13.9, 12.9. **HRMS** (APCI-MS ES+) [M+H]<sup>+</sup>, calculated for C<sub>33</sub>H<sub>49</sub>O<sub>2</sub>; 477.3733; found 477.3750.

<sup>12</sup> Baek, Y.; Kim, S.; Jeon, B.; Lee, P. H. *Org. Lett.* **2016**, *18*, 104.

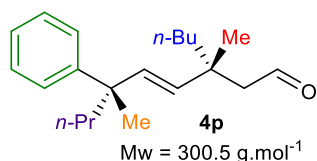

**(3R\*,6S\*,4E)-3-butyl-3,6-dimethyl-6-phenylnon-4-enal (4p).**

From **3p** and phenylboronic acid. Yield = 54 mg (73%). Colorless oil. *E/Z* > 99:1. *dr* > 95:5.  $^1\text{H NMR}$  (400 MHz,  $\text{CDCl}_3$ )  $\delta$  9.73 (t,  $J$  = 3.1 Hz, 1H), 7.36 – 7.10 (m, 6H), 5.59 (d,  $J$  = 16.2 Hz, 1H), 5.43 (d,  $J$  = 16.2 Hz, 1H), 2.39 (dd,  $J$  = 14.7, 2.7 Hz, 1H), 2.30 (dd,  $J$  = 14.7, 3.5 Hz, 1H), 1.78 – 1.61 (m, 2H), 1.45 – 1.37 (m, 2H), 1.35 (s, 3H), 1.32 – 1.17 (m, 6H), 1.14 (s, 3H), 0.94 – 0.82 (m, 6H).  $^{13}\text{C NMR}$  (101 MHz,  $\text{CDCl}_3$ )  $\delta$  203.9, 148.3, 137.7, 134.2, 128.2, 126.7, 125.8, 54.1, 44.2, 43.7, 42.1, 38.3, 26.3, 26.0, 24.3, 23.4, 18.0, 14.9, 14.2. **HRMS** (TOF-MS  $\text{ES}^+$ )  $[\text{M}+\text{Na}]^+$ , calculated for  $\text{C}_{21}\text{H}_{32}\text{ONa}$ ; 323.2351; found 323.2350.

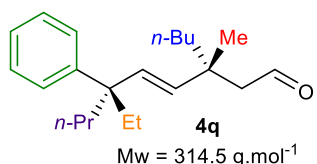

**(3R\*,6S\*,4E)-3-butyl-6-ethyl-3-methyl-6-phenylnon-4-enal (4q).**

From **3o** and phenylboronic acid. Yield = 61 mg (78%). Colorless oil. *E/Z* > 99:1. *dr* > 95:5.  $^1\text{H NMR}$  (400 MHz,  $\text{CDCl}_3$ )  $\delta$  9.73 (t,  $J$  = 3.1 Hz, 1H), 7.31 – 7.08 (m, 5H), 5.45 (d,  $J$  = 1.5 Hz, 2H), 2.39 (dd,  $J$  = 14.7, 2.8 Hz, 1H), 2.29 (dd,  $J$  = 14.7, 3.5 Hz, 1H), 1.85 – 1.59 (m, 4H), 1.44 – 1.34 (m, 2H), 1.32 – 1.16 (m, 4H), 1.16 – 0.92 (m, 5H), 0.85 (dt,  $J$  = 14.5, 7.0 Hz, 6H), 0.66 (t,  $J$  = 7.4 Hz, 3H).  $^{13}\text{C NMR}$  (101 MHz,  $\text{CDCl}_3$ )  $\delta$  203.9, 146.8, 136.3, 135.1, 128.0, 127.5, 125.7, 54.2, 47.2, 42.2, 40.1, 38.6, 30.4, 26.4, 24.3, 23.4, 17.4, 15.0, 14.2, 8.7. **HRMS** (APCI-MS  $\text{ES}^+$ )  $[\text{M}+\text{H}]^+$ , calculated for  $\text{C}_{22}\text{H}_{35}\text{O}$ ; 315.2682; found 315.2652.

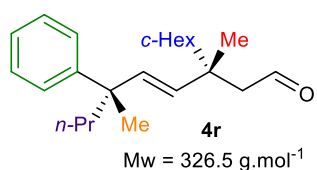

**(3S\*,6S\*,4E)-3-cyclohexyl-3,6-dimethyl-6-phenylnon-4-enal (4r).**

From **3q** and phenylboronic acid. Yield = 60 mg (75%). Colorless oil. *E/Z* > 99:1. *dr* > 95:5.  $^1\text{H NMR}$  (400 MHz,  $\text{CDCl}_3$ )  $\delta$  9.81 – 9.59 (m, 1H), 7.35 – 7.11 (m, 5H), 5.59 (d,  $J$  = 16.3 Hz, 1H), 5.44 (d,  $J$  = 16.3 Hz, 1H), 2.41 (dd,  $J$  = 14.6, 2.5 Hz, 1H), 2.33 (dd,  $J$  = 14.6, 3.6 Hz, 1H), 1.87 – 1.61 (m, 7H), 1.35 (s, 3H), 1.28 – 1.03 (m, 9H), 1.00 – 0.91 (m, 2H), 0.87 (t,  $J$  = 7.3 Hz, 3H).  $^{13}\text{C NMR}$  (101 MHz,  $\text{CDCl}_3$ )  $\delta$  204.4, 148.2, 138.3, 133.3, 128.1, 126.6, 125.7, 52.1, 48.0, 44.2, 43.8, 40.9, 27.5, 27.3, 26.9, 26.6, 25.9, 20.8, 17.9, 14.8. **HRMS** (TOF-MS  $\text{ES}^+$ )  $[\text{M}+\text{Na}]^+$ , calculated for  $\text{C}_{23}\text{H}_{34}\text{ONa}$ ; 349.2507; found 349.2498.

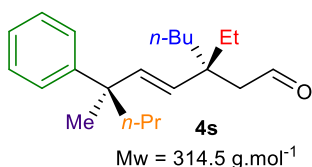

**(3R\*,6R\*,4E)-3-butyl-3-ethyl-6-methyl-6-phenylnon-4-enal (4s).**

From **3r** and phenylboronic acid. Yield = 63 mg (81%). Colorless oil. *E/Z* > 99:1. *dr* > 95:5:0:0.  $^1\text{H NMR}$  (400 MHz,  $\text{CDCl}_3$ )  $\delta$  9.74 – 9.72 (m, 1H), 7.37 – 7.08 (m, 5H), 5.57 (d,  $J = 16.4$  Hz, 1H), 5.33 (d,  $J = 16.4$  Hz, 1H), 2.36 (s, 2H), 1.70 (ddd,  $J = 21.9, 13.5, 7.5$  Hz, 2H), 1.59 – 1.05 (m, 13H), 1.00 – 0.77 (m, 9H).  $^{13}\text{C NMR}$  (101 MHz,  $\text{CDCl}_3$ )  $\delta$  203.9, 148.3, 138.3, 133.8, 128.2, 126.7, 125.8, 50.0, 44.3, 43.9, 41.3, 37.4, 30.6, 26.1, 25.8, 23.4, 18.0, 14.9, 14.2, 8.1.  $^{19}\text{F NMR}$  (376 MHz,  $\text{CDCl}_3$ )  $\delta$  -118.09. **HRMS** (APCI-MS  $\text{ES}^+$ )  $[\text{M}+\text{H}]^+$ , calculated for  $\text{C}_{22}\text{H}_{35}\text{O}$ ; 315.2682; found 315.2704.

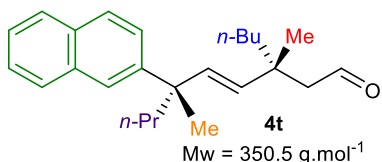

**(3R\*,6S\*,4E)-3-butyl-3,6-dimethyl-6-(2-naphthalenyl)non-**

**4-enal (4t).** From **3p** and 2-naphthylboronic acid. Yield = 56 mg (64%). White oily wax. *E/Z* > 99:1. *dr* > 95:5.  $^1\text{H NMR}$  (400 MHz,  $\text{CDCl}_3$ )  $\delta$  9.76 (t,  $J = 3.2$  Hz, 1H), 7.86 – 7.75 (m, 3H), 7.70 (d,  $J = 1.6$  Hz, 1H), 7.53 – 7.38 (m, 3H), 5.67 (d,  $J = 16.2$  Hz, 1H), 5.47 (d,  $J = 16.2$  Hz, 1H), 2.42 (dd,  $J = 14.7, 2.8$  Hz, 1H), 2.32 (dd,  $J = 14.7, 3.5$  Hz, 1H), 1.92 – 1.74 (m, 2H), 1.48 – 1.08 (m, 14H), 0.95 – 0.88 (m, 6H).  $^{13}\text{C NMR}$  (101 MHz,  $\text{CDCl}_3$ )  $\delta$  203.79, 145.54, 137.74, 134.50, 133.34, 131.82, 127.98, 127.56, 127.41, 125.90, 125.88, 125.46, 124.65, 54.06, 43.95, 43.86, 42.00, 38.31, 26.28, 25.77, 24.19, 23.31, 17.94, 14.87, 14.16. **HRMS** (APCI-MS  $\text{ES}^+$ )  $[\text{M}+\text{H}]^+$ , calculated for  $\text{C}_{25}\text{H}_{34}\text{O}$ ; 351.2688; found 351.2676.

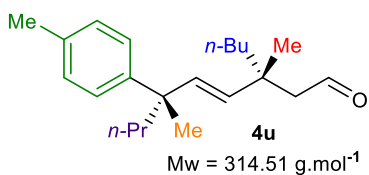

**(3R\*,6S\*,4E)-3-butyl-3,6-dimethyl-6-(p-tolyl)non-4-enal**

**(4u).** From **3p** and p-tolylboronic acid. Yield = 36 mg (47%). Colorless oil. *E/Z* > 99:1. *dr* > 95:5.  $^1\text{H NMR}$  (400 MHz,  $\text{CDCl}_3$ )  $\delta$  9.72 (t,  $J = 3.2$  Hz, 1H), 7.15 (d,  $J = 8.3$  Hz, 2H), 7.09 (d,  $J = 8.2$  Hz, 2H), 5.57 (d,  $J = 16.2$  Hz, 1H), 5.41 (d,  $J = 16.2$  Hz, 1H), 2.41 – 2.36 (m, 1H), 2.33 – 2.24 (m, 4H), 1.76 – 1.57 (m, 2H), 1.44 – 1.35 (m, 2H), 1.34 – 1.05 (m, 12H), 0.93 – 0.82 (m, 6H).  $^{13}\text{C NMR}$  (101 MHz,  $\text{CDCl}_3$ )  $\delta$  203.96, 145.34, 137.87, 135.21, 133.97, 128.87, 126.59, 54.14, 44.23, 43.38, 42.06, 38.31, 26.33, 26.01, 24.31, 23.37, 20.99, 18.01, 14.93, 14.20. **HRMS** (APCI-MS  $\text{ES}^+$ )  $[\text{M}+\text{H}]^+$ , calculated for  $\text{C}_{22}\text{H}_{35}\text{O}$ ; 315.2682; found 315.2688.

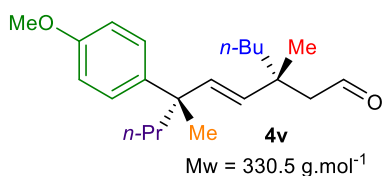

**(3R\*,6S\*,4E)-3-butyl-6-(4-methoxyphenyl)-3,6-dimethylnon-4-enal (4v).** From **3p** and 4-

methoxybenzeneboronic acid. Yield = 62 mg (75%). Colorless oil. *E/Z* > 99:1. *dr* > 95:5. <sup>1</sup>H NMR (400 MHz, CDCl<sub>3</sub>) δ 9.72 (t, *J* = 3.2 Hz, 1H), 7.17 (d, *J* = 8.9 Hz, 2H), 6.83 (d, *J* = 8.9 Hz, 2H), 5.56 (d, *J* = 16.2 Hz, 1H), 5.40 (d, *J* = 16.2 Hz, 1H), 3.79 (s, 3H), 2.39 (dd, *J* = 14.7, 2.8 Hz, 1H), 2.29 (dd, *J* = 14.7, 3.5 Hz, 1H), 1.74 – 1.62 (m, 2H), 1.45 – 1.04 (m, 14H), 0.92 – 0.83 (m, 6H). <sup>13</sup>C NMR (101 MHz, CDCl<sub>3</sub>) δ 203.9, 157.6, 140.4, 138.0, 133.9, 127.7, 113.5, 55.3, 54.1, 44.3, 43.1, 42.1, 38.3, 26.3, 26.1, 24.3, 23.4, 18.0, 14.9, 14.2. HRMS (APCI-MS ES<sup>+</sup>) [M+H]<sup>+</sup>, calculated for C<sub>22</sub>H<sub>35</sub>O<sub>2</sub>; 331.2632; found 331.2682.

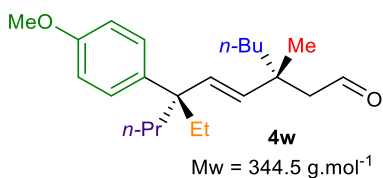

**(3R\*,6S\*,4E)-3-butyl-6-ethyl-6-(4-methoxyphenyl)-3-**

**methylnon-4-enal (4w).** From **3o** and 4-methoxybenzeneboronic acid. Yield = 66 mg (78%). Colorless oil. *E/Z* > 99:1. *dr* > 95:5. <sup>1</sup>H NMR (400 MHz, CDCl<sub>3</sub>) δ 9.76 (t, *J* = 3.1 Hz, 1H), 7.15 (d, *J* = 8.8 Hz, 2H), 6.83 (d, *J* = 8.8 Hz, 2H), 5.45 (s, 2H), 3.79 (s, 4H), 2.42 (dd, *J* = 14.7, 2.8 Hz, 1H), 2.32 (dd, *J* = 14.7, 3.4 Hz, 1H), 1.83 – 1.62 (m, 4H), 1.46 – 1.39 (m, 3H), 1.35 – 1.21 (m, 5H), 1.15 (s, 3H), 0.92 – 0.84 (m, 6H), 0.69 (t, *J* = 7.4 Hz, 3H). <sup>13</sup>C NMR (101 MHz, CDCl<sub>3</sub>) δ 203.9, 157.5, 138.8, 136.6, 134.9, 128.5, 113.3, 55.3, 54.2, 46.5, 42.2, 40.2, 38.5, 30.5, 26.4, 24.3, 23.4, 17.4, 14.9, 14.2, 8.7. HRMS (APCI-MS ES<sup>+</sup>) [M+H]<sup>+</sup>, calculated for C<sub>23</sub>H<sub>37</sub>O<sub>2</sub>; 345.2788; found 345.2757.

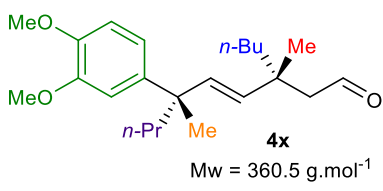

**(3R\*,6S\*,4E)-3-butyl-6-(3,4-dimethoxyphenyl)-3,6-**

**dimethylnon-4-enal (4x).** From **3p** and 3,4-dimethoxybenzeneboronic acid. Yield = 77 mg (87%). Pale yellow oil. *E/Z* > 99:1. *dr* > 95:5. <sup>1</sup>H NMR (400 MHz, CDCl<sub>3</sub>) δ 9.74 (t, *J* = 3.1 Hz, 1H), 6.80 (s, 2H), 6.77 (s, 1H), 5.56 (d, *J* = 16.2 Hz, 1H), 5.41 (d, *J* = 16.2 Hz, 1H), 3.86 (s, 3H), 3.85 (s, 3H), 2.40 (dd, *J* = 14.7, 2.8 Hz, 1H), 2.31 (dd, *J* = 14.7, 3.4 Hz, 1H), 1.76 – 1.57 (m, 3H), 1.41 (dd, *J* = 9.3, 6.2 Hz, 3H), 1.35 – 1.18 (m, 12H), 1.15 (s, 3H), 0.92 – 0.84 (m,

6H).  $^{13}\text{C}$  NMR (101 MHz,  $\text{CDCl}_3$ )  $\delta$  203.7, 148.6, 147.1, 141.0, 137.9, 134.0, 118.5, 110.7, 110.7, 56.0, 55.9, 54.15, 44.2, 43.5, 42.1, 38.4, 26.4, 26.1, 24.3, 23.4, 18.0, 14.9, 14.2. HRMS (APCI-MS  $\text{ES}^+$ )  $[\text{M}+\text{H}]^+$ , calculated for  $\text{C}_{23}\text{H}_{37}\text{O}_3$ ; 361.2737; found 361.2760.

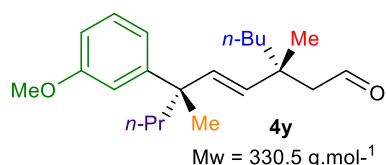

**(3R\*,6S\*,4E)-3-butyl-6-(3-methoxyphenyl)-3,6-dimethylnon-4-enal (4y).** From **3p** and 3-methoxybenzeneboronic acid. Yield = 43 mg (52%). Colorless oil.  $E/Z > 99:1$ .  $\text{dr} > 95:5$ .  $^1\text{H}$  NMR (400 MHz,  $\text{CDCl}_3$ )  $\delta$  9.73

(t,  $J = 3.2$  Hz, 1H), 7.21 (t,  $J = 8.0$  Hz, 1H), 6.86 (ddd,  $J = 7.8, 1.6, 0.8$  Hz, 1H), 6.83 – 6.81 (m, 1H), 6.72 (ddd,  $J = 8.1, 2.5, 0.7$  Hz, 1H), 5.58 (d,  $J = 16.2$  Hz, 1H), 5.43 (d,  $J = 16.2$  Hz, 1H), 3.79 (s, 3H), 2.39 (dd,  $J = 14.7, 2.8$  Hz, 1H), 2.30 (dd,  $J = 14.7, 3.5$  Hz, 1H), 1.69 (m, 2H), 1.44 – 1.05 (m, 14H), 0.88 (m, 6H).  $^{13}\text{C}$  NMR (101 MHz,  $\text{CDCl}_3$ )  $\delta$  203.86, 159.50, 150.17, 137.57, 134.18, 129.02, 119.21, 113.21, 110.57, 55.22, 54.12, 44.16, 43.81, 42.06, 38.34, 26.35, 25.94, 24.31, 23.38, 18.00, 14.92, 14.19. HRMS (APCI-MS  $\text{ES}^+$ )  $[\text{M}+\text{H}]^+$ , calculated for  $\text{C}_{22}\text{H}_{35}\text{O}_2$ ; 331.2637; found 331.2648.

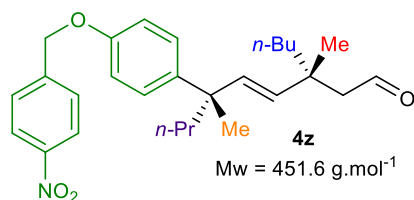

**(3R\*,6S\*,4E)-3-butyl-3,6-dimethyl-6-(4-((4-nitrobenzyl)oxy)phenyl)non-4-enal (4z).** From **3p** (0.15 mmol) and 1.5 equiv. of arylboronic acid [prepared by treating 4-hydroxyboronic acid (1 equiv., 0.25 mmol) with

4-nitrobenzyl bromide (1 equiv., 0.25 mmol) in the presence of anhydrous  $\text{K}_2\text{CO}_3$  (2 equiv.) in acetone (5 mL) under vigorous stirring for 48h]. After reaction, the suspension was diluted with water and extracted three times with EtOAc. The combined organic phases were dried over anhydrous  $\text{MgSO}_4$  and concentrated. The crude solid was used without further purification in the following reaction.] Yield = 26 mg (40%). Yellow oily wax.  $E/Z > 99:1$ .  $\text{dr} > 95:5$ .  $^1\text{H}$  NMR (400 MHz,  $\text{CDCl}_3$ )  $\delta$  9.72 (t,  $J = 3.1$  Hz, 1H), 8.25 (d,  $J = 8.8$  Hz, 2H), 7.61 (d,  $J = 8.8$  Hz, 2H), 7.19 (d,  $J = 8.9$  Hz, 2H), 6.88 (d,  $J = 8.9$  Hz, 2H), 5.55 (d,  $J = 16.2$  Hz, 1H), 5.40 (d,  $J = 16.2$  Hz, 1H), 5.15 (s, 2H), 2.39 (dd,  $J = 14.7, 2.8$  Hz, 1H), 2.30 (dd,  $J = 14.7, 3.5$  Hz, 1H), 1.75 – 1.53 (m, 4H), 1.40 (dd,  $J = 10.0, 5.9$  Hz, 2H), 1.34 – 1.17 (m, 9H), 1.14 (s, 3H), 0.93 – 0.83 (m, 6H).  $^{13}\text{C}$  NMR (101 MHz,  $\text{CDCl}_3$ )  $\delta$  203.9, 156.2, 147.7, 144.9, 141.5, 137.8, 134.1, 127.9, 127.7, 124.0, 114.4, 68.8, 54.1, 44.3, 43.2, 42.1, 38.3, 26.3, 26.1, 24.3, 23.4, 18.0, 14.9, 14.2. HRMS (TOF-MS  $\text{ES}^+$ )  $[\text{M}+\text{H}]^+$ , calculated for  $\text{C}_{28}\text{H}_{37}\text{NO}_4$ ; 452.2801; found 452.2751.



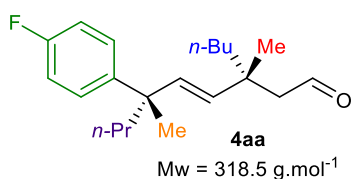

**(3R\*,6S\*,4E)-3-butyl-6-(4-fluorophenyl)-3,6-dimethylnon-4-enal (4aa).** From **3p** and 4-fluorobenzeneboronic acid. Yield = 59 mg (76%). Colorless oil. *E/Z* > 99:1. *dr* > 95:5. <sup>1</sup>H NMR (400 MHz, CDCl<sub>3</sub>) δ 9.72 (t, *J* = 3.1 Hz, 1H), 7.20 (dd, *J* = 8.9, 5.4 Hz, 2H), 6.96 (t, *J* = 8.8 Hz, 2H), 5.55 (d, *J* = 16.2 Hz, 1H), 5.40 (d, *J* = 16.2 Hz, 1H), 2.39 (dd, *J* = 14.7, 2.8 Hz, 1H), 2.30 (dd, *J* = 14.7, 3.4 Hz, 1H), 1.76 – 1.58 (m, 2H), 1.46 – 1.00 (m, 14H), 0.90 – 0.84 (m, 6H). <sup>13</sup>C NMR (101 MHz, CDCl<sub>3</sub>) δ 202.5, 161.2, 158.7, 142.8, 142.8, 136.4, 133.2, 127.0 (d, *J* = 7.7 Hz), 113.6 (d, *J* = 20.8 Hz), 52.9, 43.2, 42.2, 40.9, 37.2, 25.2, 25.0, 23.1, 22.2, 16.8, 13.7, 13.0. <sup>19</sup>F NMR (376 MHz, CDCl<sub>3</sub>) δ -118.1. HRMS (APCI-MS ES<sup>+</sup>) [M+H]<sup>+</sup>, calculated for C<sub>21</sub>H<sub>32</sub>O<sub>2</sub>F; 319.2437; found 319.2475.

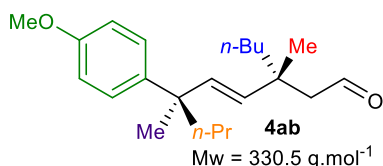

**(3R\*,6R\*,4E)-3-butyl-6-(4-methoxyphenyl)-3,6-dimethylnon-4-enal (4ab).** From **3p** and 4-methoxybenzeneboronic acid. Yield = 70 mg (85%). Colorless oil. *E/Z* > 99:1. *dr* > 95:5. <sup>1</sup>H NMR (400 MHz, CDCl<sub>3</sub>) δ 9.73 (t, *J* = 3.2 Hz, 1H), 7.18 (d, *J* = 8.9 Hz, 2H), 6.83 (d, *J* = 8.9 Hz, 2H), 5.57 (d, *J* = 16.2 Hz, 1H), 5.40 (d, *J* = 16.2 Hz, 1H), 3.79 (s, 3H), 2.39 (dd, *J* = 14.7, 2.7 Hz, 1H), 2.30 (dd, *J* = 14.7, 3.5 Hz, 1H), 1.68 (ddt, *J* = 19.9, 13.5, 6.8 Hz, 2H), 1.45 – 1.36 (m, 2H), 1.35 – 1.07 (m, 12H), 0.94 – 0.82 (m, 6H). <sup>13</sup>C NMR (101 MHz, CDCl<sub>3</sub>) δ 203.9, 157.5, 140.3, 137.9, 133.9, 127.6, 113.3, 65.9, 55.2, 54.0, 44.2, 43.0, 42.0, 38.2, 26.2, 26.1, 24.2, 23.3, 17.9, 15.3, 14.8, 14.1. HRMS (APCI-MS ES<sup>+</sup>) [M+K]<sup>+</sup>, calculated for C<sub>22</sub>H<sub>35</sub>O<sub>2</sub>K; 370.2273; found 370.2321.

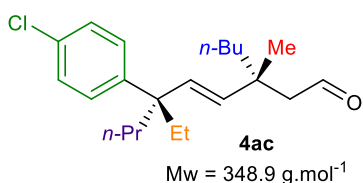

**(3R\*,6S\*,4E)-3-butyl-6-(4-chlorophenyl)-6-ethyl-3-methylnon-4-enal (4ac).** From **3o** and 4-chlorobenzeneboronic acid. Yield = 38 mg (44%). Colorless oil. *E/Z* > 99:1. *dr* > 95:5. <sup>1</sup>H NMR (400 MHz, CDCl<sub>3</sub>) δ 9.74 (t, *J* = 3.1 Hz, 1H), 7.25 (d, *J* = 8.5 Hz, 2H), 7.16 (d, *J* = 8.6 Hz, 2H), 5.44 (s, 2H), 2.45 – 2.37 (m, 1H), 2.32 (dd, *J* = 14.7, 3.3 Hz, 1H), 1.84 – 1.62 (m, 5H), 1.47 – 1.38 (s, 3H), 1.31 – 1.21 (m, 5H), 1.15 (s, 3H), 0.87 (m, 6H), 0.68 (t, *J* = 7.4 Hz, 3H). <sup>13</sup>C NMR (101 MHz, CDCl<sub>3</sub>) δ 203.6, 145.4, 135.9, 135.6, 131.5, 128.9, 128.1, 54.1, 47.0, 42.1, 40.1, 38.6, 30.4, 26.4, 24.3, 23.4, 17.4, 14.9, 14.2, 8.6. HRMS (TOF-MS ES<sup>+</sup>) [M+Na]<sup>+</sup>, calculated for C<sub>22</sub>H<sub>33</sub>OClNa; 371.2117; found 371.2098.

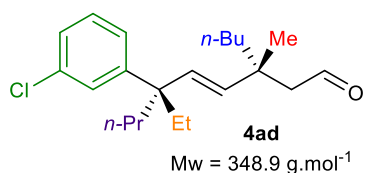

**(3R\*,6S\*,4E)-3-butyl-6-(3-chlorophenyl)-6-ethyl-3-methylnon-4-enal (4ad)**. From **3o** and 3-chlorobenzeneboronic acid. Yield = 20 mg (23%). Colorless oil. *E/Z* > 99:1. *dr* > 95:5. <sup>1</sup>H NMR (400 MHz, CDCl<sub>3</sub>) δ 9.74 (t, *J* = 3.1 Hz, 1H), 7.25 (d, *J* = 8.5 Hz, 2H), 7.16 (d, *J* = 8.6 Hz, 2H), 5.44 (s, 2H), 2.45 – 2.37 (m, 1H), 2.32 (dd, *J* = 14.7, 3.3 Hz, 1H), 1.84 – 1.62 (m, 5H), 1.47 – 1.38 (s, 3H), 1.31 – 1.21 (m, 5H), 1.15 (s, 3H), 0.87 (m, 6H), 0.68 (t, *J* = 7.4 Hz, 3H). <sup>13</sup>C NMR (101 MHz, CDCl<sub>3</sub>) δ 203.6, 145.4, 135.9, 135.6, 131.5, 128.9, 128.1, 54.1, 47.0, 42.1, 40.1, 38.6, 30.4, 26.4, 24.3, 23.4, 17.4, 14.9, 14.2, 8.6. HRMS (TOF-MS ES<sup>+</sup>) [M+Na]<sup>+</sup>, calculated for C<sub>22</sub>H<sub>33</sub>OCINa; 371.2117; found 371.2105.

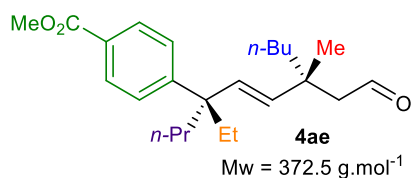

**4-((4S\*,7R\*,5E)-4-ethyl-7-methyl-7-(2-methoxyphenyl)undec-5-en-4-yl)benzoate (4ae)**. From **3o** and 4-methylcarboxylatebenzeneboronic acid. Yield = 22 mg (25%). Pale yellow oil. *E/Z* > 99:1. *dr* > 95:5. *R<sub>f</sub>* = 0.3 (10:90 Et<sub>2</sub>O/Hex, stain: phosphomolybdic acid solution) <sup>1</sup>H NMR (400 MHz, CDCl<sub>3</sub>) δ 9.75 (t, *J* = 3.1 Hz, 1H), 7.95 (d, *J* = 8.5 Hz, 2H), 7.31 (d, *J* = 8.5 Hz, 2H), 5.46 (s, 2H), 3.90 (s, 3H), 2.41 (dd, *J* = 14.7, 2.8 Hz, 1H), 2.33 (dd, *J* = 14.7, 3.3 Hz, 1H), 1.87 – 1.67 (m, 4H), 1.43 (t, *J* = 7.8 Hz, 3H), 1.31 – 1.21 (m, 5H), 1.16 (s, 3H), 0.91 – 0.83 (dt, *J* = 14.5, 7.0 Hz, 6H), 0.68 (t, *J* = 7.4 Hz, 3H). <sup>13</sup>C NMR (101 MHz, CDCl<sub>3</sub>) δ 203.5, 167.3, 152.5, 135.9, 135.6, 129.4, 127.6, 54.1, 52.1, 47.6, 42.1, 40.1, 38.6, 30.4, 26.4, 24.3, 23.4, 17.4, 14.9, 14.2, 8.6. HRMS (APCI-MS ES<sup>+</sup>) [M+H]<sup>+</sup>, calculated for C<sub>24</sub>H<sub>37</sub>O<sub>3</sub>; 373.2737; found 373.2701.

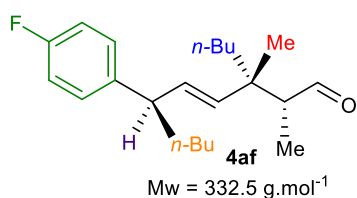

**(2R\*,3S\*,6R\*,4E)-3-butyl-6-(4-fluorophenyl)-2,3-dimethyldec-4-enal (4af)**. From **3l** and 4-fluorobenzeneboronic acid. Yield = 45 mg (54%). Colorless oil. *E/Z* > 99:1. *dr* = 86:14:0:0. <sup>1</sup>H NMR (400 MHz, CDCl<sub>3</sub>) δ 9.70 (d, *J* = 2.5 Hz, 1H), 7.15 – 7.06 (m, 2H), 6.97 (dd, *J* = 12.1, 5.3 Hz, 2H), 5.50 – 5.44 (m, 2H), 3.24 (dd, *J* = 4.4, 2.4 Hz, 1H), 2.31 (dd, *J* = 6.9, 2.4 Hz, 1H), 1.66 (dd, *J* = 15.1, 7.6 Hz, 2H), 1.41 – 1.04 (m, 10H), 0.99 (d, *J* = 7.0 Hz, 3H), 0.98 (s, 3H), 0.91 – 0.78 (m, 6H). <sup>13</sup>C NMR (101 MHz, CDCl<sub>3</sub>) δ 206.3, 161.3 (d, *J* = 243.6 Hz), 140.9 (d, *J* = 3.1 Hz), 135.9, 133.6, 128.8 (d, *J* = 7.7 Hz),

115.1 (d,  $J = 21.0$  Hz), 53.8, 48.2, 40.8, 39.7, 35.7, 29.9, 25.9, 23.3, 22.6, 20.1, 14.1, 14.1, 8.7. **HRMS** (APCI-MS ES<sup>+</sup>) [M+H]<sup>+</sup>, calculated for C<sub>22</sub>H<sub>34</sub>O; 333.2588; found 333.2599.

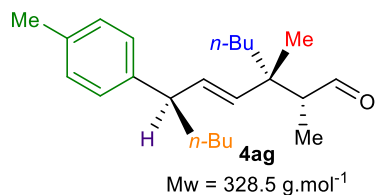

**(2R\*,3S\*,6R\*,4E)-3-butyl-2,3-dimethyl-6-(*p*-tolyl)dec-4-enal (4ag).** From **3l** and *p*-tolylboronic acid. Yield = 47 mg (57%). Colorless oil.  $E/Z > 99:1$ . dr  $> 95:5:0:0$ . **<sup>1</sup>H NMR** (400 MHz, CDCl<sub>3</sub>) δ 9.72 (d,  $J = 2.5$  Hz, 1H), 7.11 (d,  $J = 8.0$  Hz, 2H), 7.07 (d,  $J = 8.1$  Hz, 2H), 5.54 (d,  $J = 15.8$  Hz, 1H), 5.48 (d,  $J = 15.5$  Hz, 2H), 3.24 (dd,  $J = 13.5, 7.1$  Hz, 1H), 2.39 – 2.30 (m, 1H), 2.33 (s, 3H), 1.72 – 1.59 (m, 2H), 1.47 – 1.07 (m, 10H), 1.01 (d,  $J = 6.9$  Hz, 3H), 0.99 (s, 3H), 0.93 – 0.83 (m, 6H). **<sup>13</sup>C NMR** (101 MHz, CDCl<sub>3</sub>) δ 206.5, 142.2, 135.5, 135.4, 134.0, 129.1, 127.4, 53.9, 48.6, 40.8, 39.8, 35.7, 30.0, 25.9, 23.3, 22.9, 22.7, 21.0, 20.1, 14.1, 14.1, 8.7. **HRMS** (APCI-MS ES<sup>+</sup>) [M+H]<sup>+</sup>, calculated for C<sub>23</sub>H<sub>37</sub>O; 329.2844; found 329.2843.

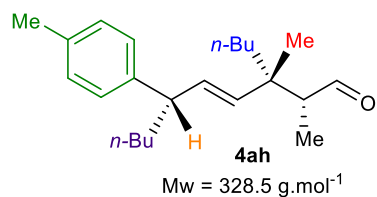

**(2R\*,3S\*,6S\*,4E)-3-butyl-2,3-dimethyl-6-(*p*-tolyl)dec-4-enal (4ah).** From **3k** and *p*-tolylboronic acid. Yield = 53 mg (64%). Colorless oil.  $E/Z > 99:1$ . dr = 92:8:0:0. **<sup>1</sup>H NMR** (400 MHz, CDCl<sub>3</sub>) δ 9.56 (d,  $J = 2.3$  Hz, 1H), 7.03 (d,  $J = 8.0$  Hz, 2H), 6.97 (d,  $J = 8.1$  Hz, 2H), 5.42 (s, 1H), 5.41 (s, 1H), 3.21 – 3.03 (m, 1H), 2.24 (s, 3H), 2.22 (dd,  $J = 7.0, 2.3$  Hz, 1H), 1.65-1.55 (m, 2H), 1.42 – 1.00 (m, 10H), 0.92-0.87 (m, 6H), 0.82 (t,  $J = 6.9$  Hz, 3H), 0.79 (d,  $J = 7.2$  Hz, 3H). **<sup>13</sup>C NMR** (101 MHz, CDCl<sub>3</sub>) δ 206.6, 142.2, 135.5, 135.4, 133.9, 129.1, 127.3, 54.1, 48.6, 40.9, 39.8, 35.7, 30.0, 26.1, 23.4, 22.7, 21.0, 19.9, 14.2, 14.1, 8.6. **HRMS** (APCI-MS ES<sup>+</sup>) [M+Na]<sup>+</sup>, calculated for C<sub>23</sub>H<sub>36</sub>ONa; 351.2664; found 351.2651.

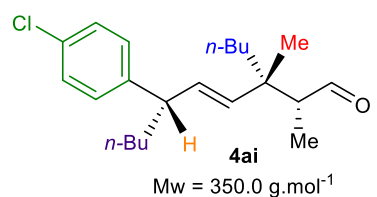

**(2R\*,3S\*,6S\*,4E)-3-butyl-6-(4-chlorophenyl)-2,3-dimethyldec-4-enal (4ai).** From **3k** and 4-chlorobenzeneboronic acid. Yield = 29 mg (33%). Colorless oil.  $E/Z > 99:1$ . dr = 92:8:0:0. **<sup>1</sup>H NMR** (400 MHz, CDCl<sub>3</sub>) δ 9.61 (d,  $J = 2.4$  Hz, 1H), 7.30 – 7.21 (m, 2H), 7.12 – 7.04 (m, 2H), 5.48 (d,  $J = 15.1$  Hz, 1H), 5.43 (d,  $J = 13.1$  Hz, 1H), 3.22 (dd,  $J = 13.5, 7.1$  Hz, 1H), 2.28 (qd,  $J = 6.9, 2.5$  Hz, 1H), 1.65 (dd,

$J = 15.1, 7.6$  Hz, 2H), 1.48 – 1.07 (m, 10H), 0.97 (s, 3H), 0.95 (d,  $J=7.7$  Hz, 3H), 0.88 (t,  $J = 7.4$  Hz, 3H), 0.86 (t,  $J = 7.4$  Hz, 3H).  $^{13}\text{C}$  NMR (101 MHz,  $\text{CDCl}_3$ )  $\delta$  206.2, 143.7, 136.2, 133.3, 131.7, 128.8, 128.6, 54.0, 48.4, 40.9, 39.7, 35.6, 29.9, 26.0, 23.4, 22.6, 19.9, 14.1, 14.1, 8.6. HRMS (APCI-MS  $\text{ES}^+$ )  $[\text{M}+\text{H}]^+$ , calculated for  $\text{C}_{22}\text{H}_{35}\text{OCl}$ ; 351.2376; found 351.2100.

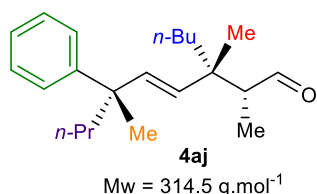

**(2R\*,3S\*,6S\*,4E)-3-butyl-2,3,6-trimethyl-6-phenylnon-4-enal**

**(4aj)**. From **3v** and phenylboronic acid. Yield = 26 mg (36%).

Colorless oil.  $E/Z > 99:1$ . dr = 92:8:0:0.  $^1\text{H}$  NMR (400 MHz,  $\text{CDCl}_3$ )

$\delta$  9.65 (d,  $J = 2.5$  Hz, 1H), 7.24 – 7.16 (dd,  $J = 8.2, 6.0$  Hz, 5H), 5.54

(d,  $J = 16.3$  Hz, 1H), 5.37 (d,  $J = 16.3$  Hz, 1H), 2.27 (qd,  $J = 6.9, 2.5$  Hz, 1H), 1.73 – 1.56 (m, 2H), 1.49 (s, 1H), 1.39 – 1.32 (m, 3H), 1.29 (s, 3H), 1.25 – 0.98 (m, 8H), 0.96 – 0.93 (m, 6H), 0.85 – 0.78 (m, 6H).  $^{13}\text{C}$  NMR (101 MHz,  $\text{CDCl}_3$ )  $\delta$  206.5, 148.3, 138.7, 133.2, 128.2, 126.8, 125.8, 54.4, 44.3, 44.0, 41.0, 40.0, 26.2, 26.0, 23.5, 20.2, 18.0, 14.9, 14.2, 8.9. HRMS (APCI-MS  $\text{ES}^+$ )  $[\text{M}+\text{OH}]^+$ , calculated for  $\text{C}_{22}\text{H}_{35}\text{O}_2$ ; 331.2637; found 331.2634.

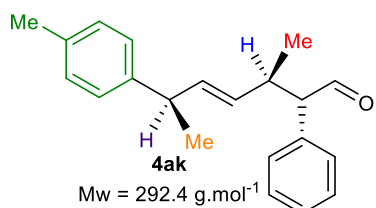

**(2S\*,3R\*,6R\*,4E)-3-methyl-2-phenyl-6-(p-tolyl)hept-4-enal**

**(4ak)**. From **3m** and *p*-tolylboronic acid. Yield = 42 mg (58%).

Colorless oil.  $E/Z > 99:1$ . dr > 95:5:0:0.  $^1\text{H}$  NMR (400 MHz,

$\text{CDCl}_3$ )  $\delta$  9.74 (d,  $J = 2.9$  Hz, 1H), 7.33 (m, 3H), 7.14 (d,  $J = 6.7$

Hz, 2H), 7.02 (d,  $J = 7.9$  Hz, 2H), 6.80 (d,  $J = 8.0$  Hz, 2H), 5.42 (dd,  $J = 15.4, 6.8$  Hz, 1H), 5.12 (dd,  $J = 15.4, 8.1$  Hz, 1H), 3.37 (dd,  $J = 8.9, 2.8$  Hz, 1H), 3.23 (p,  $J = 6.9$  Hz, 1H), 3.08 – 2.94 (m, 1H), 2.31 (s, 3H), 1.18 (d,  $J = 7.0$  Hz, 3H), 1.12 (d,  $J = 6.7$  Hz, 3H).  $^{13}\text{C}$  NMR (101 MHz,  $\text{CDCl}_3$ )  $\delta$  200.9, 142.7, 136.2, 135.3, 135.1, 130.8, 129.8, 128.9, 128.8, 127.4, 127.0, 65.4, 41.4, 37.4, 21.1, 21.0, 19.2.

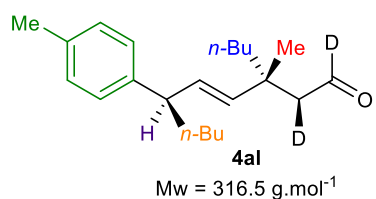

**(2S\*,3R\*,6R\*,4E)-3-butyl-3-methyl-6-(p-tolyl)dec-4-enal-**

**1,2-d<sub>2</sub> (4al)**. From **3n** and *p*-tolylboronic acid. Yield = 45 mg (57%). Colorless oil.  $E/Z > 99:1$ . dr > 95:5:0:0.  $^1\text{H}$  NMR (400

MHz,  $\text{CDCl}_3$ )  $\delta$  7.10 (d,  $J = 8.0$  Hz, 1H), 7.05 (d,  $J = 8.1$  Hz,

1H), 5.50 (d,  $J = 15.8$  Hz, 1H), 5.45 (d,  $J = 15.7$  Hz, 1H), 3.19 (dd,  $J = 13.6, 7.1$  Hz, 1H), 2.32 (s, 3H), 2.25 (s, 1H), 1.65 (ddd,  $J = 9.3, 7.3, 2.5$  Hz, 2H), 1.40 – 1.12 (m, 10H), 1.10 (s, 3H),

0.86 (t,  $J = 7.1$  Hz, 3H), 0.86 (t,  $J = 7.1$  Hz, 3H).  $^{13}\text{C}$  NMR (101 MHz,  $\text{CDCl}_3$ )  $\delta$  142.2, 136.5, 135.5, 132.8, 129.1, 127.3, 48.4, 41.8, 38.1, 35.8, 29.9, 26.1, 24.3, 23.3, 22.7, 21.0, 14.1, 14.1. HRMS (APCI-MS  $\text{ES}^+$ )  $[\text{M}+\text{H}]^+$ , calculated for  $\text{C}_{22}\text{H}_{33}\text{OD}_2$ ; 317.2808; found 317.2812.

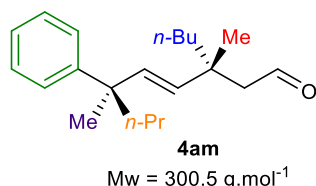

**(3R\*,6R\*,4E)-3-butyl-3,6-dimethyl-6-phenylnon-4-enal (4am).**

From **3t** and phenylboronic acid. Yield = 60 mg (81%). Colorless oil.  $^1\text{H}$  NMR (400 MHz,  $\text{CDCl}_3$ )  $\delta$  9.73 (t,  $J = 3.2$  Hz, 1H), 7.18 (d,  $J = 8.9$  Hz, 2H), 6.83 (d,  $J = 8.9$  Hz, 2H), 5.57 (d,  $J = 16.2$  Hz, 1H), 5.40 (d,  $J = 16.2$  Hz, 1H), 3.79 (s, 3H), 2.39 (dd,  $J = 14.7, 2.7$  Hz, 1H), 2.30 (dd,  $J = 14.7, 3.5$  Hz, 1H), 1.78 – 1.54 (m, 3H), 1.46 – 1.05 (m, 16H), 0.88 (m, 6H).  $^{13}\text{C}$  NMR (101 MHz,  $\text{CDCl}_3$ )  $\delta$  203.9, 148.4, 137.7, 134.3, 128.2, 126.7, 125.8, 54.1, 44.3, 43.8, 42.1, 38.3, 26.3, 26.0, 24.3, 23.4, 18.0, 14.9, 14.2. HRMS (TOF-MS  $\text{ES}^+$ )  $[\text{M}+\text{Na}]^+$ , calculated for  $\text{C}_{21}\text{H}_{32}\text{ONa}$ ; 323.2351; found 323.2372.

Racemic stereoisomers **4an** (prepared from **3u**) and **4ao** (prepared from **3v**) present similar characterization data than with **4p** and **4am** respectively.

## Typical procedure for the Heck vinylation of vinylcyclopropyl carbinol **3c** with cyclohexenyl triflate

In a dry one-neck flask under O<sub>2</sub> (balloon, 1 atm), 5-(2-pyridyl)-1,3-oxazole (9 mol%), [Pd(MeCN)<sub>2</sub>(OTs)<sub>2</sub>] (7.5 mol%), Cu(OTf)<sub>2</sub> (5 mol%), molecular sieves 3 Å (100% w/w substrate) and vinylcyclopropyl carbinol **3c** (1 equiv., 0.25 mmol) were dissolved into DMA (8 mL/mmol substrate). Cyclohexenyl triflate<sup>13</sup> (3 equiv.) was then rapidly added into the reaction mixture which was set on stirring at 55°C for 18 h. After completion of the reaction, the reaction mixture was diluted with brine and EtOAc. The phases were separated and the aqueous phase was successively washed three times with EtOAc. The combined organic phases were then dried over anhydrous MgSO<sub>4</sub> and concentrated under reduced pressure. A column chromatography (gradient eluent 100% hexane / 5% Et<sub>2</sub>O/hexane) afforded the desired aldehyde **4ap**.

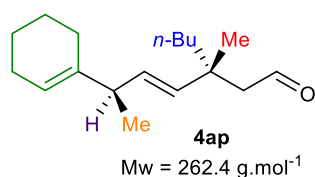

**(3R\*,6R\*,4E)-3-butyl-6-(cyclohex-1-en-1-yl)-3-methylhept-4-enal (4ap)**. From **3c**. Yield = 35 mg (53%). Colorless oil. *E/Z* > 99:1. dr > 95:5. <sup>1</sup>H NMR (400 MHz, CDCl<sub>3</sub>) δ 9.71 (t, *J* = 3.2 Hz, 1H), 5.41 (br, 1H), 5.39 (d, *J* = 15.3 Hz, 1H), 5.29 (dd, *J* = 15.8, 7.0 Hz, 1H), 2.66 (p, *J* = 6.9 Hz, 1H), 2.35 (dd, *J* = 14.7, 2.8 Hz, 1H), 2.25 (dd, *J* = 14.7, 3.5 Hz, 1H), 2.11 – 1.96 (m, 2H), 1.96 – 1.73 (m, 2H), 1.66 – 1.45 (m, 4H), 1.41 – 1.31 (m, 2H), 1.23 (m, 4H), 1.10 (s, 3H), 1.07 (d, *J* = 6.9 Hz, 3H), 0.88 (t, *J* = 7.1 Hz, 3H). <sup>13</sup>C NMR (101 MHz, CDCl<sub>3</sub>) δ 204.2, 141.1, 135.7, 133.3, 120.2, 53.8, 43.9, 41.9, 38.1, 26.6, 26.1, 25.3, 24.2, 23.3, 23.1, 22.7, 18.7, 14.1. HRMS [Found (APCI-MS ES<sup>+</sup>): [C<sub>18</sub>H<sub>31</sub>O]<sup>+</sup> 263.2387, C<sub>18</sub>H<sub>31</sub>O calcul 263.2369].

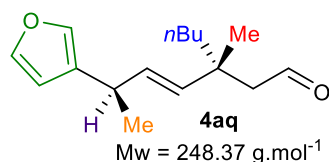

**(3R\*,6R\*,4E)-3-butyl-6-(furan-3-yl)-3-methylhept-4-enal (4aq)**. From **3c**. Yield = 19 mg (30%). Colorless oil. *E/Z* > 99:1. dr > 95:5. <sup>1</sup>H NMR (400 MHz, CDCl<sub>3</sub>) δ 9.72 (t, *J* = 3.1 Hz, 1H), 7.35 (t, *J* = 1.5 Hz, 1H), 7.17 (s, 1H), 6.23 (s, 1H), 5.50 (d, *J* = 15.8 Hz, 1H), 5.46 (d, *J* = 6.4 Hz, 1H), 3.39 – 3.23 (m, 1H), 2.37 (dd, *J* = 14.7, 2.8 Hz, 1H), 2.28 (dd, *J* = 14.7, 3.4 Hz, 1H), 1.28 (d, *J* = 7.0 Hz, 3H), 1.46 – 1.16 (m, 6H), 1.13 (s, 3H), 0.89 (t, *J* = 7.1

<sup>13</sup> Garcia Martinez, Herrera, A.; Martinez, R.; Teso, E.; Garcia, A.; Osio, J.; Pargada, L.; Unanue, R. *J. Heter. Chem.* **1988**, 25, 1237.

Hz, 3H).  $^{13}\text{C}$  NMR (101 MHz,  $\text{CDCl}_3$ )  $\delta$  203.8, 143.0, 138.3, 136.3, 133.1, 129.8, 110.2, 53.6, 41.9, 38.2, 33.8, 26.2, 24.3, 23.4, 21.1, 14.2.

## General procedure for the Fujiwara-Moritani insertion of *N*-methylindole on vinylcyclopropyl carbinols

In a dry one-neck flask under O<sub>2</sub> (balloon, 1 atm), 5-(2-pyridyl)-1,3-oxazole (9 mol%), [Pd(MeCN)<sub>2</sub>(OTs)<sub>2</sub>] (7.5 mol%), anhydrous CuSO<sub>4</sub> (5 mol%), molecular sieves 3 Å (100% w/w substrate) and vinylcyclopropyl carbinol (1 equiv.) were dissolved into DMA (8 mL/mmol substrate). *N*-methylindole (5 equiv.) was then rapidly added into the reaction mixture which was set on stirring at 55°C for 18 h. After completion of the reaction, the reaction mixture was diluted with brine (50 mL/mmol) and EtOAc (50 mL/mmol). The phases were separated and the aqueous phase was successively washed three times with EtOAc. The combined organic phases were then dried over anhydrous MgSO<sub>4</sub> and concentrated under reduced pressure. A column chromatography (gradient eluent 100% hexane / 10% Et<sub>2</sub>O/hexane) afforded the desired aldehyde.

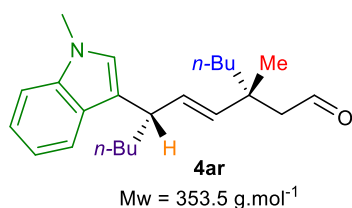

**(3R\*,6S\*,4E)-3-butyl-3-methyl-6-(1-methyl-1H-indol-3-yl)dec-4-enal (4ar)**. From **3e**. Yield = 49 mg (56%). Colorless oil. *E/Z* > 99:1. *dr* > 95:5. <sup>1</sup>H NMR (400 MHz, CDCl<sub>3</sub>) δ 9.65 (t, *J* = 3.1 Hz, 1H), 7.57 (d, *J* = 7.9 Hz, 1H), 7.27 (d, *J* = 8.2 Hz, 1H), 7.22 – 7.15 (m, 1H), 7.09 – 7.02 (m, 1H), 6.79 (s, 1H), 5.57 (d, *J* = 15.7 Hz, 1H), 5.50 (dd, *J* = 15.7, 7.4 Hz, 1H), 3.73 (s, 3H), 3.53 (dd, *J* = 14.4, 7.4 Hz, 1H), 2.35 (dd, *J* = 14.7, 2.7 Hz, 1H), 2.23 (dd, *J* = 14.7, 3.6 Hz, 1H), 1.94 – 1.80 (m, 1H), 1.77 – 1.63 (m, 1H), 1.42 – 1.16 (m, 10H), 1.10 (s, 3H), 0.88 (dt, *J* = 14.1, 7.1 Hz, 6H). <sup>13</sup>C NMR (101 MHz, CDCl<sub>3</sub>) δ 204.2, 137.2, 136.4 (CH), 132.7, 127.3, 125.2, 121.5, 119.6, 118.5, 118.3, 109.2, 53.9, 41.9, 40.3, 38.3, 35.1, 32.7, 30.1, 26.3, 24.2, 23.3, 22.7, 14.2, 14.1. HRMS [Found (APCI+): [C<sub>24</sub>H<sub>36</sub>NO]<sup>+</sup> 354.2802, C<sub>24</sub>H<sub>36</sub>NO calcul 354.2797].

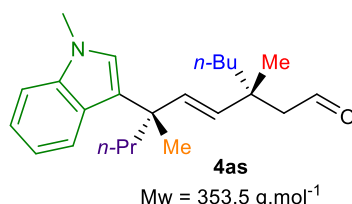

**(3R\*,6S\*,4E)-3-butyl-3,6-dimethyl-6-(1-methyl-1H-indol-3-yl)non-4-enal (4as)**. From **3p** using 5-(2-pyridyl)-1,3-oxazole (18 mol%), [Pd(MeCN)<sub>2</sub>(OTs)<sub>2</sub>] (15 mol%), anhydrous CuSO<sub>4</sub> (10 mol%). Yield = 49 mg (56%). Yellow oil. *R<sub>f</sub>* = 0.5 (40:60 Et<sub>2</sub>O/Hex, *p*-anisaldehyde). *E/Z* > 99:1. *dr* > 95:5:0:0. <sup>1</sup>H NMR (400 MHz, CDCl<sub>3</sub>) δ 9.69 (t, *J* = 3.2 Hz, 1H), 7.61 (d, *J* = 8.1 Hz, 1H), 7.28 (d, *J* = 8.2 Hz, 1H), 7.20 – 7.15 (m, 1H), 7.04 – 6.99 (m, 1H), 6.78 (s, 1H), 5.66 (d, *J* = 16.2 Hz, 1H), 5.43 (d, *J* = 16.2 Hz, 1H), 3.75 (s, 4H),



2.35 (dd,  $J = 14.7, 2.8$  Hz, 1H), 2.28 – 2.21 (m, 1H), 1.98 – 1.89 (m, 1H), 1.74 (td,  $J = 12.6, 4.5$  Hz, 1H), 1.43 (s, 4H), 1.39 – 1.15 (m, 23H), 1.11 (s, 4H), 0.91 – 0.82 (m,  $J = 7.1, 3.9$  Hz, 12H).  
 **$^{13}\text{C}$  NMR** (101 MHz,  $\text{CDCl}_3$ )  $\delta$  204.2, 137.7, 137.5, 133.8, 126.4, 125.8, 121.7, 121.5, 121.1, 118.1, 109.2, 53.9, 43.4, 41.9, 40.2, 38.1, 32.7, 29.7, 26.2, 25.9, 24.3, 23.3, 17.8, 14.8, 14.1.  
**HRMS** (APCI-MS ES+)  $[\text{M}+\text{H}]^+$ , calculated for  $\text{C}_{24}\text{H}_{36}\text{NO}$ ; 354.2797; found 354.2779.

# Comparison of the $^{13}\text{C}$ NMR spectra of stereoisomers **4p**, **4am**, **4an** and **4ao**

Zoom from 203 – 205 ppm:

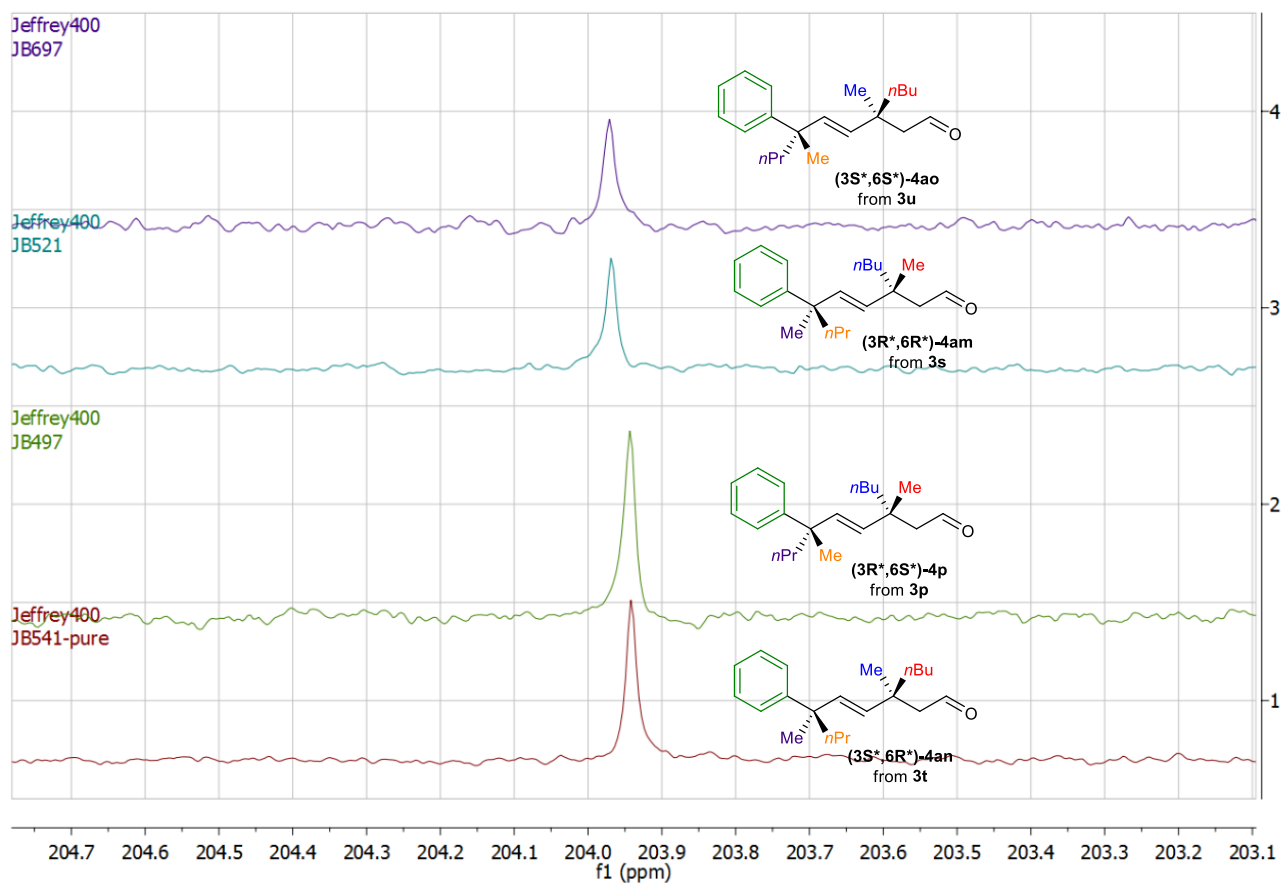

Zoom from 133 –140 ppm:

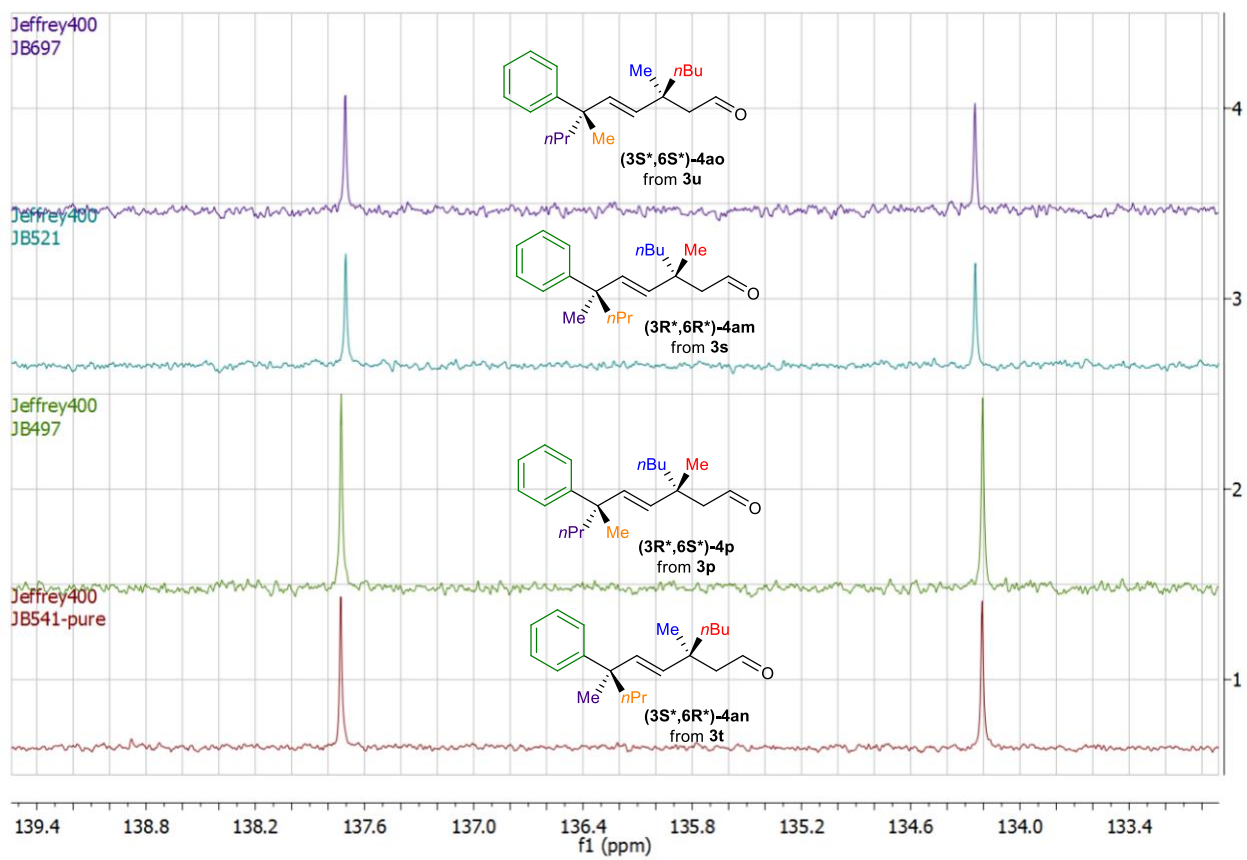

Zoom from 53 – 55 ppm:

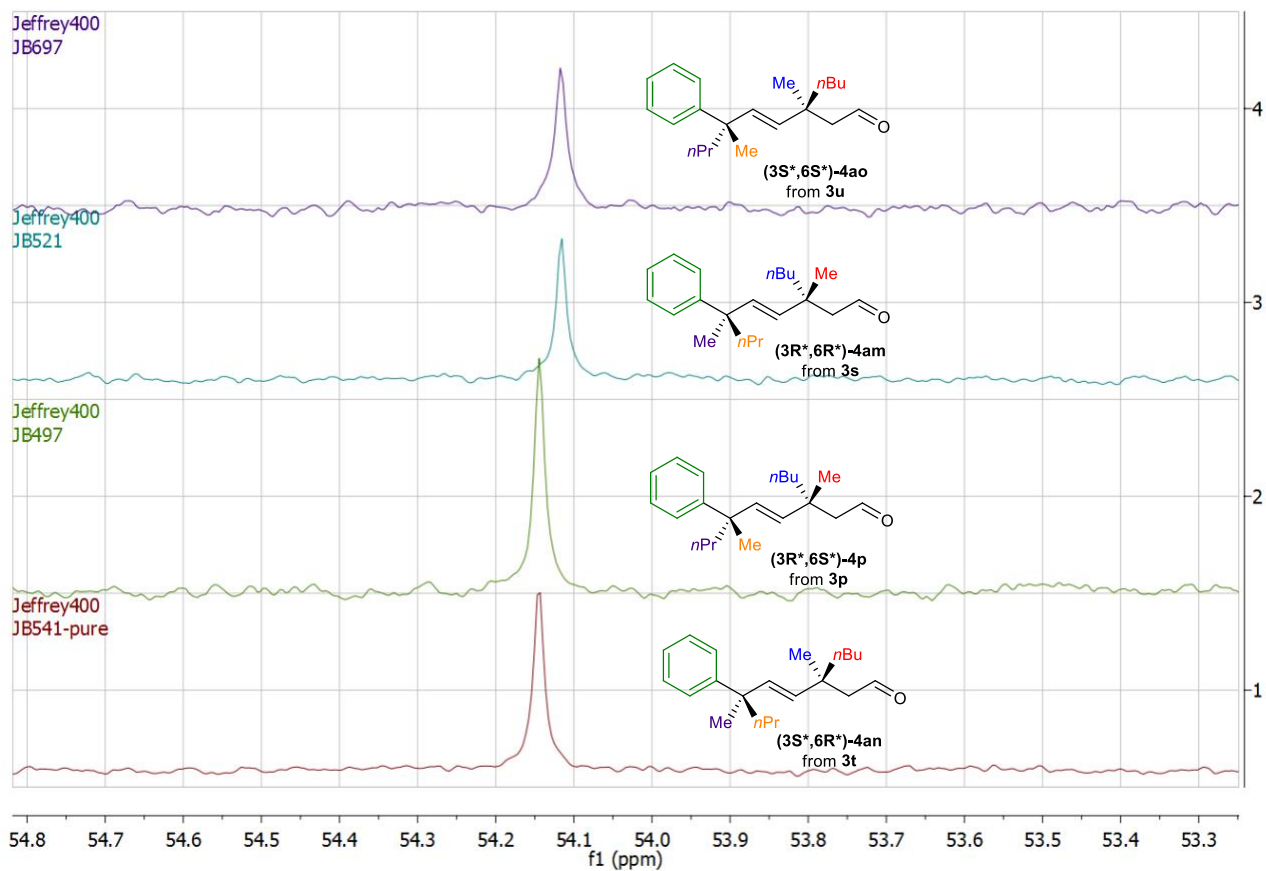

## Determination of the enantiospecificity

The determination of the enantiospecificity was assessed by comparing the enantiomeric ratio of **3e** and **4c** after the palladium-catalyzed oxidative Heck reaction. As the enantiomers of **1e** could not be directly separated on chiral HPLC columns, it was derivatized to **6**. Enantioenriched **3e** was synthesized following the similar protocol than the racemic mixture using substrate **1a** enantioenriched through a previously described protocol.<sup>14</sup>

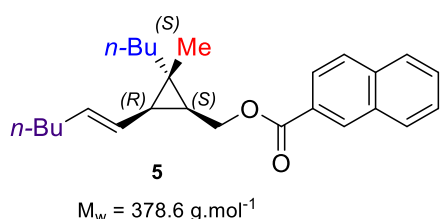

**((1S,2S,3R)-2-butyl-3-((E)-hex-1-en-1-yl)-2-methylcyclopropyl)methyl 2-naphthoate (5)**. 2-naphthoyl chloride (65 mg, 0.34 mmol, 1.1 equiv) was added to a mixture of **3h** (70 mg, 0.31 mmol, 1.0 equiv), triethylamine (35 mg, 0.34 mmol, 1.1 equiv) and N,N-dimethyl-4-aminopyridine (2 mg, 0.02 mmol, 5 mol%) in anhydrous tetrahydrofuran (0.1M). The mixture was stirred overnight and quenched by the addition of a saturated aqueous ammonium chloride solution. The aqueous phase was extracted with diethyl ether. The combined organics were dried over anhydrous sodium sulfate, filtered and concentrated to a yellow liquid which was purified by silica chromatography using 5% diethyl ether in hexane. The desired product was obtained as a colorless liquid (91 mg, 77% yield). *E/Z* > 99:1. *dr* > 98:2:0:0. **<sup>1</sup>H NMR** (400 MHz, CDCl<sub>3</sub>) δ 8.61 (s, 1H), 8.07 (dd, *J* = 8.6, 1.5 Hz, 1H), 7.96 (d, *J* = 7.8 Hz, 1H), 7.88 (d, *J* = 8.4 Hz, 2H), 7.57 (ddd, *J* = 14.9, 13.5, 6.7 Hz, 2H), 5.63 (dt, *J* = 14.8, 6.9 Hz, 1H), 5.28 (dd, *J* = 15.2, 9.1 Hz, 1H), 4.51 (dd, *J* = 11.8, 7.3 Hz, 1H), 4.40 (dd, *J* = 11.8, 9.0 Hz, 1H), 2.02 (dd, *J* = 13.3, 6.7 Hz, 2H), 1.49 (t, *J* = 9.0 Hz, 1H), 1.46 – 1.16 (m, 11H), 1.11 (s, 3H), 0.90 (t, *J* = 7.1 Hz, 3H), 0.85 (t, *J* = 7.0 Hz, 3H). **<sup>13</sup>C NMR** (101 MHz, CDCl<sub>3</sub>) δ 167.0, 135.5, 133.3, 132.6, 131.0, 129.4, 128.2, 128.1, 127.9, 127.8, 126.6, 125.4, 125.0, 63.6, 42.3, 32.7, 31.9, 30.1, 28.7, 26.6, 25.2, 22.8, 22.2, 14.3, 14.0, 13.0. **HRMS** (APCI-ES<sup>+</sup>) [*M*+*H*]<sup>+</sup>, calculated for C<sub>26</sub>H<sub>35</sub>O<sub>2</sub>; 379.2632; found 379.2620. **HPLC** analyses (CHIRALPAK®AY-H (0.46 cm Ø×25 cm, elution with hexane/isopropanol (99:1), 1 mL/minute) *er* = 85:15.

<sup>14</sup> Lou, Y.; Horikawa, M.; Kloster, A.; Hawryluk, N. A.; Corey, E. J. *J. Am. Chem. Soc.* **2004**, *126*, 8916.

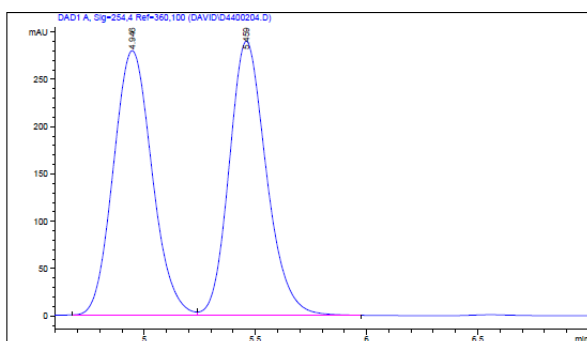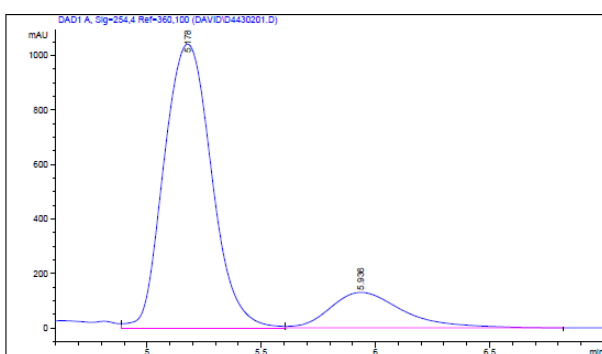

Enantioenriched compound (3*R*,6*S*)-**4c** was synthesized from enantioenriched **3e** and *p*-tolylboronic acid using the general procedure (see p. 15). HPLC analyses (CHIRALPAK<sup>®</sup> AZ-H (0.46 cm Ø×25 cm) with elution of hexane/isopropanol (99:1), flow: 1 mL/minute) er = 85:15.

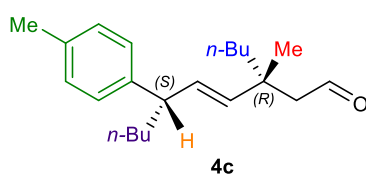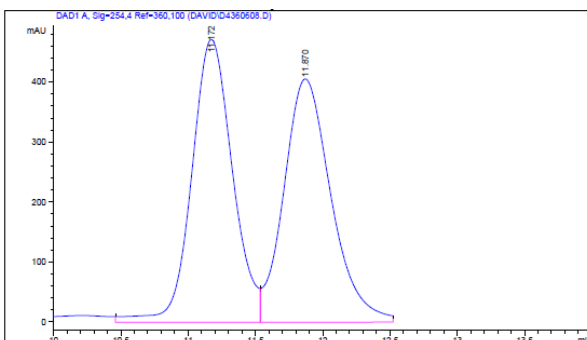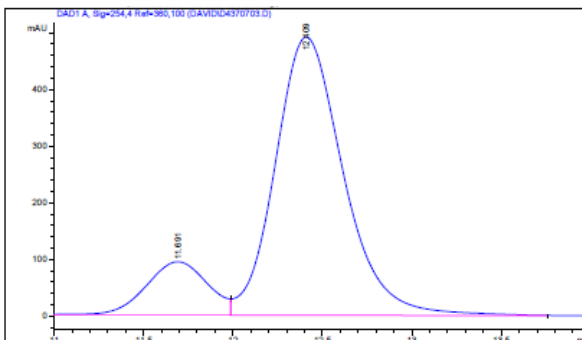

## Determination of the relative configuration

The relative configurations of aldehydes **4d** and **4ah** were respectively determined by the X-Ray analysis of their hydrazine derivative **6a** and **6b**, prepared according to the following procedures.

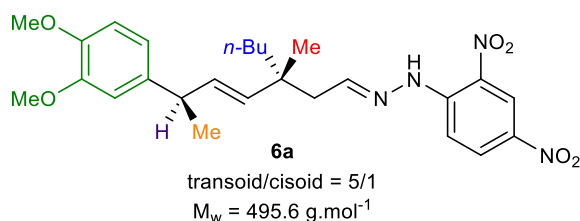

**(3R\*,6R\*,4E)-3-butyl-6-(3,4-dimethoxyphenyl)-3-methylhept-4-enal-2-(2,4-dinitrophenyl)hydrazone (6a).** 2,4-dinitrophenyl hydrazine (19 mg, 0.9 mmol, 1.0 equiv) in ethanol (3 mL) was added to the

aldehyde **4d** (30 mg, 0.9 mmol, 1.0 equiv). One drop of concentrated sulfuric acid was added. The reaction was stirred for 24 h. Ethyl acetate and water were then added. The organic fraction was washed with aqueous saturated solutions of sodium hydrogen carbonate and brine, dried over anhydrous sodium sulfate, filtered and concentrated in vacuo to an orange oil. The purification was done by silica chromatography using 15% diethyl ether in hexane. The product was obtained as an orange solid which was recrystallised using dichloromethane and hexane (1:5). **6a** was obtained as an orange solid in a 1:4 ratio of cisoid and transoid isomers. (38 mg, 81% yield). Mp = 180-182 °C (deg). <sup>1</sup>H NMR (400 MHz, CDCl<sub>3</sub>) δ 10.99 (s, 1H), 9.10 (d, *J* = 2.4 Hz, 1H), 8.35 – 8.19 (m, 1H), 7.91 (dd, *J* = 14.6, 8.6 Hz, 1H), 7.54 – 7.32 (m, 1H), 6.74 (dt, *J* = 32.1, 10.7 Hz, 3H), 5.54 (dd, *J* = 15.8, 6.5 Hz, 1H), 5.42 (d, *J* = 15.8 Hz, 1H), 3.84 (d, *J* = 1.7 Hz, 6H), 3.52 – 3.33 (m, 1H), 2.57 – 2.25 (m, 2H), 2.25 – 2.01 (m, 1H), 1.65 – 0.69 (m, 15H). <sup>13</sup>C NMR (101 MHz, CDCl<sub>3</sub>) δ 151.1, 148.8, 147.4, 145.1, 138.6, 137.8, 135.9, 133.9, 129.9, 128.8, 123.5, 118.7, 116.5, 111.1, 110.8, 55.9, 55.8, 43.5, 41.8, 41.5, 39.0, 31.6, 29.7, 26.3, 24.0, 23.3, 22.7, 21.5, 14.1.

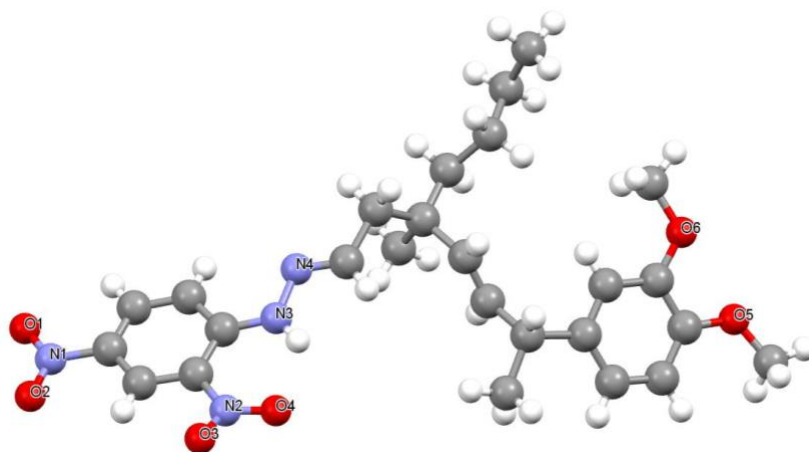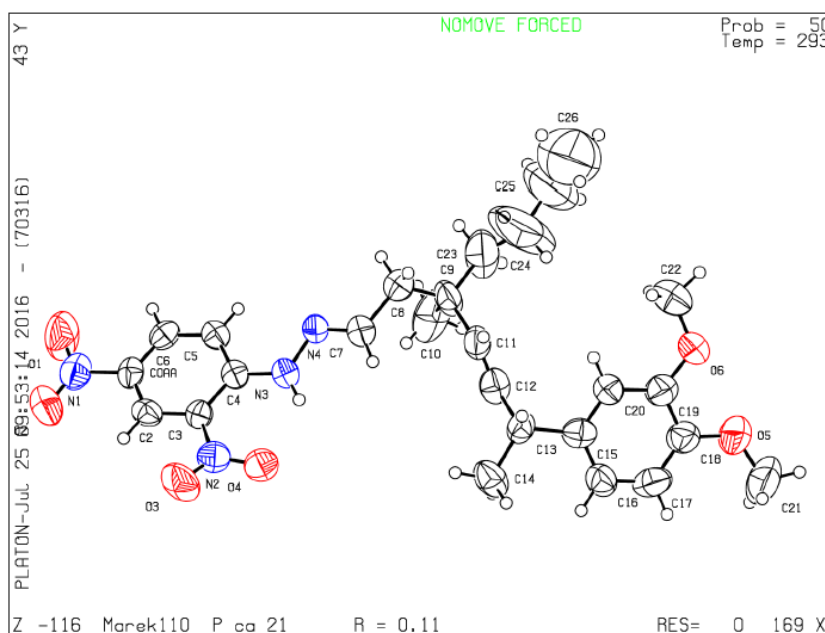

### Crystal structure determination of product **6a** (CDCC 1813305)

Single crystals suitable for X-ray diffraction were grown by dissolving compound **6a** in hexane/dichloromethane (2:1) and allowing it to evaporate slowly at room temperature. The single-crystal material was immersed in Paratone–N oil and mounted on a Kappa CCD diffractometer at temperature 293(2) K. Data collection was performed using monochromated Mo K $\alpha$  radiation,  $\lambda = 0.71073$  Å, using  $\varphi$  and  $\omega$  scans to cover the Ewald sphere.<sup>1</sup> Accurate cell parameters were obtained with the amount of indicated reflections.<sup>2</sup> The structure was solved by direct methods (SHELXS-97)<sup>3</sup> and refined by full-matrix least-squares methods against  $F^2$  (SHELXL-97).<sup>4</sup> All non-hydrogen atoms were refined with anisotropic displacement parameters. The hydrogen atoms were refined isotropically on calculated positions using a riding model with their  $U_{\text{iso}}$  values constrained to 1.5 times the  $U_{\text{eq}}$  of their pivot atoms for



terminal sp<sup>3</sup> carbon atoms and 1.2 times for all other carbon atoms. Software used for molecular graphics: Mercury 3.7.<sup>5</sup>

1. Kappa CCD Server Software, Nonius BV, Delft, The Netherlands, 1997.
2. Z. Otwinowski and W. Minor, *Methods Enzymol.*, 1997, 276, 307.
3. G. M. Sheldrick, *Acta Crystallogr., Sect. A: Fundam. Crystallogr.*, 1990, 46, 467.
4. ORTEP, TEXSAN Structure Analysis Package, Molecular Structure Corp., The Woodlands, TX, 1999.
5. Mercury Software from CCDC: <http://www.ccdc.cam.ac.uk/Solutions/CSDSystem/Pages/Mercury.aspx>.

Table 1 Crystal data and structure refinement for 6a.

|                                             |                                                               |
|---------------------------------------------|---------------------------------------------------------------|
| Identification code                         | marek110                                                      |
| Empirical formula                           | C <sub>26</sub> H <sub>25</sub> N <sub>4</sub> O <sub>6</sub> |
| Formula weight                              | 489.50                                                        |
| Temperature/K                               | 293.15                                                        |
| Crystal system                              | orthorhombic                                                  |
| Space group                                 | Pca2 <sub>1</sub>                                             |
| a/Å                                         | 6.690(5)                                                      |
| b/Å                                         | 24.410(4)                                                     |
| c/Å                                         | 16.2140(17)                                                   |
| α/°                                         | 90                                                            |
| β/°                                         | 90                                                            |
| γ/°                                         | 90                                                            |
| Volume/Å <sup>3</sup>                       | 2648(2)                                                       |
| Z                                           | 4                                                             |
| ρ <sub>calc</sub> /cm <sup>3</sup>          | 1.228                                                         |
| μ/mm <sup>-1</sup>                          | 0.089                                                         |
| F(000)                                      | 1028.0                                                        |
| Crystal size/mm <sup>3</sup>                | 0.45 × 0.24 × 0.06                                            |
| Radiation                                   | MoKα (λ = 0.71073)                                            |
| 2θ range for data collection/°              | 5.024 to 48.28                                                |
| Index ranges                                | 0 ≤ h ≤ 7, -27 ≤ k ≤ 0, 0 ≤ l ≤ 18                            |
| Reflections collected                       | 2018                                                          |
| Independent reflections                     | 2018 [R <sub>int</sub> = 0.0890, R <sub>sigma</sub> = 0.0428] |
| Data/restraints/parameters                  | 2018/106/226                                                  |
| Goodness-of-fit on F <sup>2</sup>           | 1.337                                                         |
| Final R indexes [I ≥ 2σ (I)]                | R <sub>1</sub> = 0.1018, wR <sub>2</sub> = 0.2205             |
| Final R indexes [all data]                  | R <sub>1</sub> = 0.1124, wR <sub>2</sub> = 0.2258             |
| Largest diff. peak/hole / e Å <sup>-3</sup> | 0.21/-0.14                                                    |

Flack parameter                    0.0

**Alert level B**

THETM01\_ALERT\_3\_B The value of  $\sin(\theta_{\max})/\lambda$  is less than 0.575

Calculated  $\sin(\theta_{\max})/\lambda = 0.5619$

**Author Response: Weak diffracted crystal**

PLAT220\_ALERT\_2\_B Non-Solvent Resd 1 C  $U_{\text{eq}}(\text{max})/U_{\text{eq}}(\text{min})$  Range    7.8 Ratio

**Author Response: Partly disordered n-butyl group in the molecule**

PLAT241\_ALERT\_2\_B High 'MainMol'  $U_{\text{eq}}$  as Compared to Neighbors of    C24 Check

**Author Response: Partly disordered n-butyl group in the molecule**

PLAT242\_ALERT\_2\_B Low 'MainMol'  $U_{\text{eq}}$  as Compared to Neighbors of    C25 Check

**Author Response: Partly disordered n-butyl group in the molecule**

PLAT340\_ALERT\_3\_B Low Bond Precision on C-C Bonds ..... 0.01937 Ang.

**Author Response: Partly disordered n-butyl group in the molecule**

Table 2 Fractional Atomic Coordinates ( $\times 10^4$ ) and Equivalent Isotropic Displacement Parameters ( $\text{\AA}^2 \times 10^3$ ) for 6a.  $U_{\text{eq}}$  is defined as 1/3 of of the trace of the orthogonalised  $U_{\text{H}}$  tensor.

| Atom | x         | y         | z         | U(eq)    |
|------|-----------|-----------|-----------|----------|
| C1   | -5146(12) | 610(4)    | -4527(11) | 55.7(19) |
| C2   | -4755(12) | 734(3)    | -3722(12) | 55.0(19) |
| C3   | -4475(12) | 315(3)    | -3166(11) | 50.5(18) |
| C4   | -4637(12) | -248(3)   | -3408(11) | 50.4(18) |
| C5   | -5010(12) | -347(3)   | -4253(11) | 54(2)    |
| C6   | -5227(12) | 72(4)     | -4799(11) | 56(2)    |
| C7   | -4780(14) | -1566(4)  | -2601(12) | 71(3)    |
| C8   | -5334(17) | -2140(4)  | -2769(12) | 84(3)    |
| C9   | -3620(20) | -2546(4)  | -2640(12) | 89(3)    |
| C10  | -1940(30) | -2410(5)  | -3246(12) | 121(4)   |
| C11  | -4340(40) | -3132(5)  | -2846(14) | 176(8)   |
| C12  | -3780(50) | -3596(9)  | -2550(20) | 159(13)  |
| C12A | -5540(70) | -3364(15) | -2450(40) | 184(12)  |
| C14  | -6880(90) | -4062(18) | -2480(50) | 210(20)  |
| C13  | -5050(40) | -4052(10) | -2881(12) | 160(12)  |
| C13A | -5370(80) | -4266(15) | -2740(40) | 181(19)  |
| C14A | -6660(60) | -4377(14) | -2460(20) | 190(20)  |
| C15  | -2870(19) | -2507(3)  | -1777(11) | 72(3)    |
| C16  | -1100(18) | -2435(4)  | -1491(11) | 70(2)    |
| C17  | -462(16)  | -2397(4)  | -613(11)  | 70(2)    |
| C18  | 462(19)   | -1841(4)  | -424(12)  | 96(3)    |
| C19  | 869(14)   | -2889(3)  | -368(11)  | 63(2)    |
| C20  | 147(15)   | -3413(4)  | -543(11)  | 70(2)    |
| C21  | 1214(16)  | -3875(4)  | -329(12)  | 73(3)    |
| C22  | 3050(16)  | -3824(4)  | 47(12)    | 78(2)    |
| C23  | 3762(17)  | -3311(4)  | 217(12)   | 85(3)    |
| C24  | 2680(17)  | -2845(4)  | 6(11)     | 77(2)    |
| C25  | 5620(30)  | -4295(7)  | 789(15)   | 149(6)   |
| C26  | -1060(20) | -4485(5)  | -989(14)  | 117(5)   |
| N1   | -5423(13) | 1050(4)   | -5130(11) | 77(2)    |
| N2   | -4121(12) | 477(3)    | -2316(11) | 68(2)    |
| N3   | -4462(11) | -669(3)   | -2872(11) | 60.1(18) |
| N4   | -4960(11) | -1190(3)  | -3143(11) | 61.0(19) |
| O1   | -5807(19) | 934(4)    | -5829(11) | 132(4)   |
| O2   | -5338(13) | 1518(3)   | -4875(11) | 107(3)   |
| O3   | -4426(15) | 940(3)    | -2109(10) | 107(3)   |
| O4   | -3435(12) | 121(3)    | -1854(10) | 82(2)    |

|    |          |          |          |        |
|----|----------|----------|----------|--------|
| O5 | 4008(15) | -4307(3) | 234(12)  | 124(3) |
| O6 | 628(14)  | -4399(3) | -469(11) | 113(3) |

Table 3 Anisotropic Displacement Parameters ( $\text{\AA}^2 \times 10^3$ ) for 6a. The Anisotropic displacement factor exponent takes the form:  $-2\pi^2[h^2a^2U_{11}+2hka*b*U_{12}+\dots]$ .

| Atom | U <sub>11</sub> | U <sub>22</sub> | U <sub>33</sub> | U <sub>23</sub> | U <sub>13</sub> | U <sub>12</sub> |
|------|-----------------|-----------------|-----------------|-----------------|-----------------|-----------------|
| C1   | 37(4)           | 61(4)           | 69(4)           | 15(4)           | 5(4)            | 6(4)            |
| C2   | 41(5)           | 49(4)           | 75(4)           | -2(4)           | 4(4)            | -1(4)           |
| C3   | 43(4)           | 54(4)           | 55(4)           | -1(3)           | 6(4)            | 5(4)            |
| C4   | 37(4)           | 54(4)           | 60(4)           | 3(3)            | 9(4)            | 2(4)            |
| C5   | 45(5)           | 55(4)           | 62(4)           | -3(3)           | 8(4)            | 4(4)            |
| C6   | 43(5)           | 72(5)           | 54(4)           | 4(4)            | 4(4)            | 1(4)            |
| C7   | 80(7)           | 57(4)           | 76(6)           | 12(5)           | -12(5)          | 5(4)            |
| C8   | 111(7)          | 66(5)           | 74(6)           | 15(5)           | -25(6)          | -11(5)          |
| C9   | 154(9)          | 51(4)           | 63(5)           | 0(4)            | -25(5)          | 9(5)            |
| C10  | 176(11)         | 140(10)         | 47(5)           | -7(6)           | -1(6)           | 59(8)           |
| C11  | 360(30)         | 54(6)           | 117(11)         | 0(6)            | -98(13)         | -20(8)          |
| C12  | 230(20)         | 55(8)           | 200(30)         | 18(15)          | -80(30)         | -29(12)         |
| C12A | 190(30)         | 101(16)         | 260(40)         | 0(20)           | -130(20)        | -43(14)         |
| C14  | 230(30)         | 120(20)         | 270(60)         | -100(30)        | -10(30)         | -50(20)         |
| C13  | 250(30)         | 84(13)          | 150(30)         | 42(17)          | -20(20)         | -100(20)        |
| C13A | 220(40)         | 84(13)          | 240(50)         | 40(20)          | 50(30)          | -66(18)         |
| C14A | 250(40)         | 110(20)         | 210(50)         | 40(30)          | 60(30)          | -70(30)         |
| C15  | 110(7)          | 53(5)           | 53(5)           | 7(4)            | -7(4)           | 6(5)            |
| C16  | 96(6)           | 60(5)           | 54(4)           | 5(4)            | 7(4)            | 12(5)           |
| C17  | 87(7)           | 65(5)           | 56(5)           | -4(4)           | -1(4)           | 7(4)            |
| C18  | 131(10)         | 63(5)           | 94(8)           | -14(6)          | -1(7)           | 1(6)            |
| C19  | 70(5)           | 66(4)           | 52(5)           | -4(4)           | 4(4)            | -4(4)           |
| C20  | 73(6)           | 67(4)           | 71(6)           | 1(5)            | -7(5)           | -5(4)           |
| C21  | 76(6)           | 61(5)           | 82(7)           | -2(5)           | -13(5)          | -2(4)           |
| C22  | 80(6)           | 75(5)           | 78(6)           | -4(5)           | -13(5)          | 8(4)            |
| C23  | 74(6)           | 91(6)           | 89(7)           | -12(6)          | -21(6)          | -4(5)           |
| C24  | 89(6)           | 73(5)           | 69(6)           | -5(5)           | -11(5)          | -9(5)           |
| C25  | 128(13)         | 163(14)         | 157(14)         | 17(11)          | -53(10)         | 48(10)          |
| C26  | 124(11)         | 77(7)           | 151(12)         | -18(7)          | -37(9)          | -21(7)          |
| N1   | 73(5)           | 74(5)           | 84(5)           | 18(4)           | 0(4)            | 3(4)            |
| N2   | 68(5)           | 72(5)           | 62(4)           | -9(4)           | 5(4)            | -1(4)           |
| N3   | 69(5)           | 49(4)           | 62(4)           | 3(3)            | -2(4)           | -5(3)           |
| N4   | 61(5)           | 54(3)           | 68(5)           | 7(3)            | -8(4)           | -1(3)           |
| O1   | 212(12)         | 108(6)          | 76(5)           | 23(4)           | -15(6)          | 19(7)           |

|    |        |       |        |        |        |       |
|----|--------|-------|--------|--------|--------|-------|
| O2 | 128(7) | 67(4) | 126(6) | 21(4)  | -12(6) | -5(4) |
| O3 | 166(8) | 69(4) | 87(5)  | -32(4) | 1(5)   | 10(5) |
| O4 | 111(6) | 79(4) | 56(4)  | -6(3)  | -15(4) | -9(4) |
| O5 | 126(7) | 88(5) | 156(8) | -18(6) | -55(6) | 34(5) |
| O6 | 132(7) | 60(4) | 149(8) | 7(5)   | -51(6) | -7(4) |

Table 4 Bond Lengths for 6a.

| Atom | Atom | Length/Å   | Atom | Atom | Length/Å   |
|------|------|------------|------|------|------------|
| C1   | C2   | 1.365(12)  | C14  | C13A | 1.21(7)    |
| C1   | C6   | 1.387(12)  | C14  | C14A | 0.78(5)    |
| C1   | N1   | 1.463(11)  | C13  | C13A | 0.61(3)    |
| C2   | C3   | 1.377(12)  | C13  | C14A | 1.5000(13) |
| C3   | C4   | 1.433(10)  | C13A | C14A | 1.01(5)    |
| C3   | N2   | 1.454(11)  | C15  | C16  | 1.284(15)  |
| C4   | C5   | 1.414(12)  | C16  | C17  | 1.489(13)  |
| C4   | N3   | 1.350(10)  | C17  | C18  | 1.522(14)  |
| C5   | C6   | 1.360(12)  | C17  | C19  | 1.548(13)  |
| C7   | C8   | 1.475(13)  | C19  | C20  | 1.396(12)  |
| C7   | N4   | 1.276(11)  | C19  | C24  | 1.359(14)  |
| C8   | C9   | 1.528(15)  | C20  | C21  | 1.380(13)  |
| C9   | C10  | 1.528(19)  | C21  | C22  | 1.377(13)  |
| C9   | C11  | 1.546(17)  | C21  | O6   | 1.356(11)  |
| C9   | C15  | 1.490(14)  | C22  | C23  | 1.367(13)  |
| C11  | C12  | 1.29(3)    | C22  | O5   | 1.376(12)  |
| C11  | C12A | 1.18(6)    | C23  | C24  | 1.390(13)  |
| C12  | C12A | 1.32(6)    | C25  | O5   | 1.402(17)  |
| C12  | C13  | 1.5000(12) | C26  | O6   | 1.422(15)  |
| C12  | C13A | 1.98(4)    | N1   | O1   | 1.195(12)  |
| C12A | C14  | 1.93(5)    | N1   | O2   | 1.218(11)  |
| C12A | C13  | 1.85(5)    | N2   | O3   | 1.196(9)   |
| C12A | C13A | 2.26(6)    | N2   | O4   | 1.235(9)   |
| C14  | C13  | 1.39(7)    | N3   | N4   | 1.387(9)   |

Table 5 Bond Angles for 6a.

| Atom | Atom | Atom | Angle/°  | Atom | Atom | Atom | Angle/° |
|------|------|------|----------|------|------|------|---------|
| C2   | C1   | C6   | 121.4(8) | C14  | C13  | C12A | 71(3)   |
| C2   | C1   | N1   | 120.0(8) | C14  | C13  | C14A | 31(2)   |
| C6   | C1   | N1   | 118.5(9) | C13A | C13  | C12  | 135(7)  |

|      |      |      |           |      |      |      |           |
|------|------|------|-----------|------|------|------|-----------|
| C1   | C2   | C3   | 119.2(8)  | C13A | C13  | C12A | 125(7)    |
| C2   | C3   | C4   | 121.5(7)  | C13A | C13  | C14  | 60(6)     |
| C2   | C3   | N2   | 116.2(7)  | C13A | C13  | C14A | 29(7)     |
| C4   | C3   | N2   | 122.2(7)  | C14A | C13  | C12A | 100(3)    |
| C5   | C4   | C3   | 116.2(7)  | C12  | C13A | C12A | 35.4(16)  |
| N3   | C4   | C3   | 123.2(8)  | C14  | C13A | C12  | 93(4)     |
| N3   | C4   | C5   | 120.6(7)  | C14  | C13A | C12A | 59(3)     |
| C6   | C5   | C4   | 121.5(8)  | C13  | C13A | C12  | 33(5)     |
| C5   | C6   | C1   | 120.0(8)  | C13  | C13A | C12A | 42(6)     |
| N4   | C7   | C8   | 122.2(9)  | C13  | C13A | C14  | 94(8)     |
| C7   | C8   | C9   | 113.6(9)  | C13  | C13A | C14A | 134(9)    |
| C8   | C9   | C11  | 109.6(12) | C14A | C13A | C12  | 127(5)    |
| C10  | C9   | C8   | 108.8(8)  | C14A | C13A | C12A | 97(5)     |
| C10  | C9   | C11  | 106.9(12) | C14A | C13A | C14  | 40(3)     |
| C15  | C9   | C8   | 109.9(9)  | C14  | C14A | C13  | 67(5)     |
| C15  | C9   | C10  | 110.0(11) | C14  | C14A | C13A | 84(5)     |
| C15  | C9   | C11  | 111.5(9)  | C13A | C14A | C13  | 17(3)     |
| C12  | C11  | C9   | 130.0(17) | C16  | C15  | C9   | 131.2(11) |
| C12A | C11  | C9   | 123(3)    | C15  | C16  | C17  | 128.2(10) |
| C12A | C11  | C12  | 64(2)     | C16  | C17  | C18  | 111.4(8)  |
| C11  | C12  | C12A | 54(2)     | C16  | C17  | C19  | 111.2(7)  |
| C11  | C12  | C13  | 111(2)    | C18  | C17  | C19  | 114.0(9)  |
| C11  | C12  | C13A | 121(3)    | C20  | C19  | C17  | 117.4(8)  |
| C12A | C12  | C13  | 82(3)     | C24  | C19  | C17  | 124.5(8)  |
| C12A | C12  | C13A | 84(3)     | C24  | C19  | C20  | 118.1(9)  |
| C13  | C12  | C13A | 13(2)     | C21  | C20  | C19  | 121.3(9)  |
| C11  | C12A | C12  | 62(3)     | C22  | C21  | C20  | 119.9(9)  |
| C11  | C12A | C14  | 137(5)    | O6   | C21  | C20  | 125.4(9)  |
| C11  | C12A | C13  | 96(4)     | O6   | C21  | C22  | 114.7(9)  |
| C11  | C12A | C13A | 108(4)    | C23  | C22  | C21  | 118.9(9)  |
| C12  | C12A | C14  | 92(3)     | C23  | C22  | O5   | 125.3(10) |
| C12  | C12A | C13  | 53.3(19)  | O5   | C22  | C21  | 115.8(9)  |
| C12  | C12A | C13A | 60(2)     | C22  | C23  | C24  | 121.1(10) |
| C14  | C12A | C13A | 32(2)     | C19  | C24  | C23  | 120.7(9)  |
| C13  | C12A | C14  | 43(2)     | O1   | N1   | C1   | 119.2(10) |
| C13  | C12A | C13A | 12.6(16)  | O1   | N1   | O2   | 123.6(9)  |
| C13  | C14  | C12A | 66(3)     | O2   | N1   | C1   | 117.1(9)  |
| C13A | C14  | C12A | 89(4)     | O3   | N2   | C3   | 119.7(8)  |
| C13A | C14  | C13  | 26(2)     | O3   | N2   | O4   | 123.9(8)  |
| C14A | C14  | C12A | 141(7)    | O4   | N2   | C3   | 116.4(7)  |
| C14A | C14  | C13  | 82(6)     | C4   | N3   | N4   | 118.3(7)  |

|      |     |      |          |     |    |     |           |
|------|-----|------|----------|-----|----|-----|-----------|
| C14A | C14 | C13A | 56(4)    | C7  | N4 | N3  | 114.8(7)  |
| C12  | C13 | C12A | 44.7(19) | C22 | O5 | C25 | 118.8(10) |
| C12  | C13 | C14A | 129(3)   | C21 | O6 | C26 | 117.9(9)  |
| C14  | C13 | C12  | 110(3)   |     |    |     |           |

Table 6 Hydrogen Atom Coordinates ( $\text{\AA}\times 10^4$ ) and Isotropic Displacement Parameters ( $\text{\AA}^2\times 10^3$ ) for 6a.

| Atom | x     | y     | z     | U(eq) |
|------|-------|-------|-------|-------|
| H2   | -4679 | 1097  | -3552 | 66    |
| H5   | -5109 | -706  | -4440 | 65    |
| H6   | -5429 | -3    | -5356 | 68    |
| H7   | -4283 | -1475 | -2083 | 85    |
| H8A  | -5797 | -2169 | -3335 | 101   |
| H8B  | -6436 | -2242 | -2412 | 101   |
| H10A | -2455 | -2418 | -3799 | 181   |
| H10B | -890  | -2674 | -3191 | 181   |
| H10C | -1431 | -2051 | -3129 | 181   |
| H15  | -3855 | -2541 | -1375 | 86    |
| H16  | -89   | -2402 | -1881 | 84    |
| H17  | -1680 | -2423 | -279  | 83    |
| H18A | 1750  | -1816 | -683  | 144   |
| H18B | 610   | -1800 | 161   | 144   |
| H18C | -390  | -1556 | -632  | 144   |
| H20  | -1077 | -3451 | -809  | 84    |
| H23  | 4991  | -3273 | 479   | 102   |
| H24  | 3202  | -2501 | 121   | 92    |
| H25A | 6713  | -4100 | 545   | 224   |
| H25B | 6023  | -4663 | 912   | 224   |
| H25C | 5212  | -4115 | 1288  | 224   |
| H26A | -760  | -4355 | -1534 | 176   |
| H26B | -2185 | -4290 | -773  | 176   |
| H26C | -1357 | -4869 | -1010 | 176   |
| H3   | -4052 | -615  | -2376 | 72    |

Table 7 Atomic Occupancy for 6a.

| Atom | Occupancy | Atom | Occupancy | Atom | Occupancy |
|------|-----------|------|-----------|------|-----------|
| C12  | 0.5       | C12A | 0.5       | C14  | 0.5       |
| C13  | 0.5       | C13A | 0.5       | C14A | 0.5       |

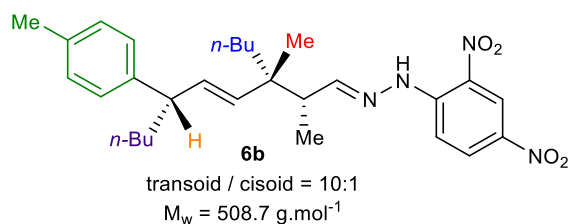

(2R\*,3S\*,6S\*,4E)-3-butyl-2,3-dimethyl-6-(*p*-tolyl)dec-4-enal-2-(2,4-dinitrophenyl)hydrazone (**6b**). 2,4-dinitrophenyl hydrazine (28 mg, 0.14 mmol, 1.0 equiv) in ethanol (3 mL) was added to the

aldehyde **4ah** (47 mg, 0.14 mmol, 1.0 equiv). One drop of concentrated sulfuric acid was added. After 10 minutes TLC showed the complete conversion of the aldehyde. Ethyl acetate and water were added. The organic fraction was washed with aqueous saturated solutions of sodium hydrogen carbonate and brine, dried over anhydrous sodium sulfate, filtered and concentrated in vacuo to an orange oil. The purification was done by silica chromatography using 15% diethyl ether in hexane. The product was obtained as an orange solid which was recrystallised using dichloromethane and hexane (1:5). **6b** was obtained as an orange solid in a 1:10 ratio of cisoid and transoid isomers. (72 mg, 98% yield). Mp = 197-199 °C (deg). <sup>1</sup>H NMR (400 MHz, CDCl<sub>3</sub>) δ 10.96 (s, 1H), 9.10 (d, *J* = 2.5 Hz, 1H), 8.27 (dd, *J* = 9.6, 2.1 Hz, 1H), 7.89 – 7.85 (m, 3H), 7.40 (t, *J* = 6.1 Hz, 1H), 7.22 (d, *J* = 8.2 Hz, 2H), 5.53 (dd, *J* = 15.8, 6.6 Hz, 1H), 5.42 (d, *J* = 16.4 Hz, 1H), 3.88 (s, 3H), 3.51 (dq, *J* = 14.2, 6.9 Hz, 1H), 2.41 (dd, *J* = 8.5, 6.3 Hz, 2H), 1.36 (d, *J* = 7.0 Hz, 3H), 1.51 – 1.11 (m, 12H), 1.07 (s, 3H), 0.96 – 0.79 (m, 6H). <sup>13</sup>C NMR (101 MHz, CDCl<sub>3</sub>) δ 166.9, 151.4, 150.8, 145.0, 137.8, 136.8, 132.9, 129.9, 129.7, 128.8, 128.1, 127.1, 127.0, 123.5, 116.4, 77.3, 52.0, 43.5, 42.4, 41.3, 39.1, 31.6, 26.2, 24.0, 23.3, 21.2, 14.1.

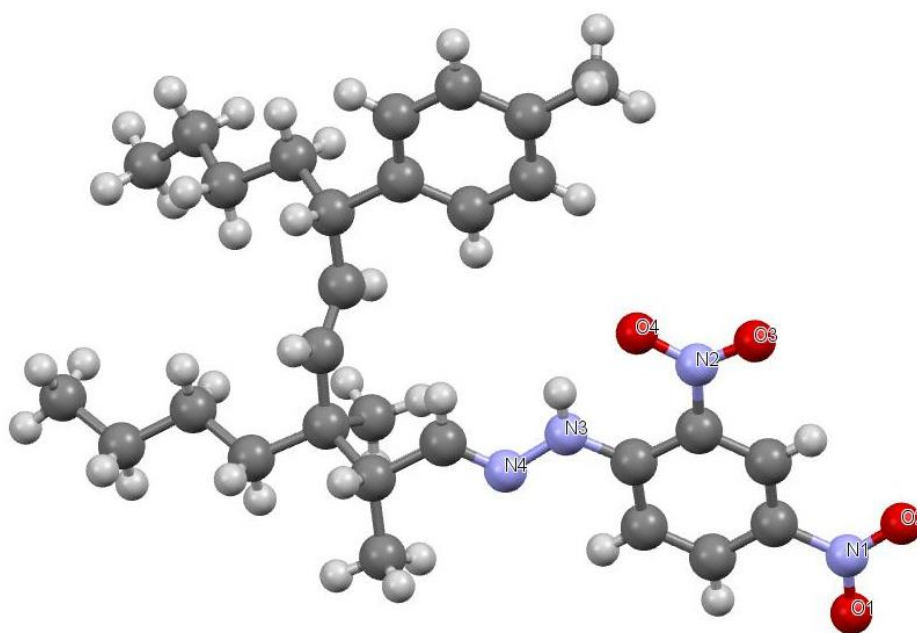



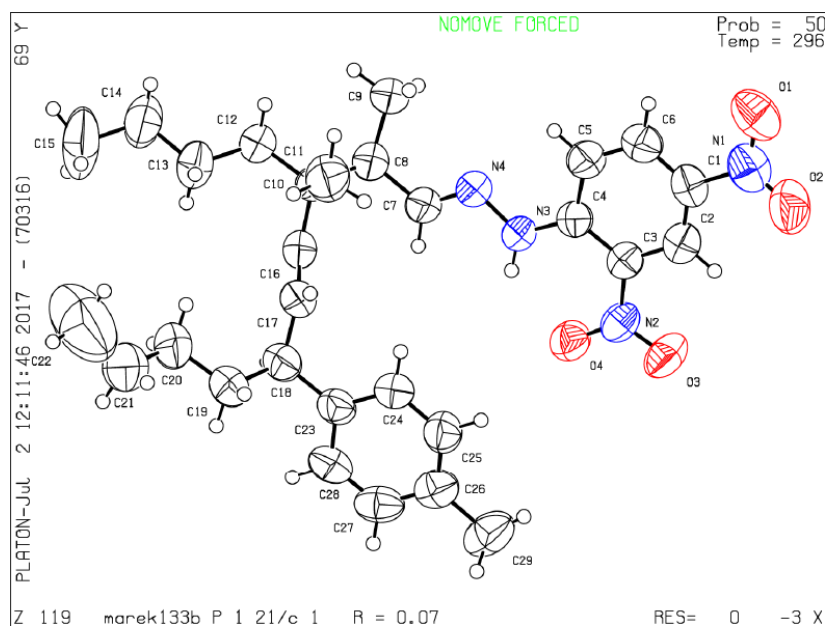

## Crystal structure determination of product **6b** (CDCC 1813312)

Single crystals suitable for X-ray diffraction were grown by dissolving compound **6b** in dichloromethane/hexane (1:4) and allowing it to evaporate slowly at room temperature. The single-crystal material was immersed in Paratone–N oil and mounted on an APEX2 v2010.7-0 (Bruker AXS) diffractometer at temperature 296.15(2) K. Data collection was performed using monochromated Mo K $\alpha$  radiation,  $\lambda = 0.71073$  Å, using  $\varphi$  and  $\omega$  scans to cover the Ewald sphere.<sup>1</sup> Accurate cell parameters were obtained with the amount of indicated reflections.<sup>2</sup> The structure was solved by direct methods (SHELXS-97)<sup>3</sup> and refined by full-matrix least-squares methods against  $F^2$  (SHELXL-97).<sup>4</sup> All non-hydrogen atoms were refined with anisotropic displacement parameters. The hydrogen atoms were refined isotropically on calculated positions using a riding model with their  $U_{\text{iso}}$  values constrained to 1.5 times the  $U_{\text{eq}}$  of their pivot atoms for terminal sp<sup>3</sup> carbon atoms and 1.2 times for all other carbon atoms. Software used for molecular graphics: Mercury 3.7.<sup>5</sup>

1. 'APEX2 v2010.7-0 (Bruker AXS)'

2. Z. Otwinowski and W. Minor, *Methods Enzymol.*, 1997, 276, 307.

3. G. M. Sheldrick, *Acta Crystallogr., Sect. A: Fundam. Crystallogr.*, 1990, 46, 467.

4. ORTEP, TEXSAN Structure Analysis Package, Molecular Structure Corp., The Woodlands, TX, 1999.

5. Mercury Software from CCDC: <http://www.ccdc.cam.ac.uk/Solutions/CSDSystem/Pages/Mercury.aspx>.

Table 1 Crystal data and structure refinement for 6b.

|                                             |                                                               |
|---------------------------------------------|---------------------------------------------------------------|
| Identification code                         | Marek133b                                                     |
| Empirical formula                           | C <sub>29</sub> O <sub>4</sub> N <sub>4</sub> H <sub>40</sub> |
| Formula weight                              | 508.65                                                        |
| Temperature/K                               | 296.15                                                        |
| Crystal system                              | monoclinic                                                    |
| Space group                                 | P2 <sub>1</sub> /c                                            |
| a/Å                                         | 7.036(2)                                                      |
| b/Å                                         | 23.049(7)                                                     |
| c/Å                                         | 18.453(6)                                                     |
| α/°                                         | 90                                                            |
| β/°                                         | 96.995(4)                                                     |
| γ/°                                         | 90                                                            |
| Volume/Å <sup>3</sup>                       | 2970.4(17)                                                    |
| Z                                           | 4                                                             |
| ρ <sub>calc</sub> /cm <sup>3</sup>          | 1.137                                                         |
| μ/mm <sup>-1</sup>                          | 0.076                                                         |
| F(000)                                      | 1096.0                                                        |
| Crystal size/mm <sup>3</sup>                | 0.3 × 0.15 × 0.12                                             |
| Radiation                                   | MoKα (λ = 0.71073)                                            |
| 2θ range for data collection/°              | 2.84 to 48.282                                                |
| Index ranges                                | -7 ≤ h ≤ 7, -25 ≤ k ≤ 25, -20 ≤ l ≤ 20                        |
| Reflections collected                       | 35171                                                         |
| Independent reflections                     | 4371 [R <sub>int</sub> = 0.0431, R <sub>sigma</sub> = 0.0224] |
| Data/restraints/parameters                  | 4371/0/339                                                    |
| Goodness-of-fit on F <sup>2</sup>           | 1.047                                                         |
| Final R indexes [I ≥ 2σ (I)]                | R <sub>1</sub> = 0.0736, wR <sub>2</sub> = 0.1245             |
| Final R indexes [all data]                  | R <sub>1</sub> = 0.1043, wR <sub>2</sub> = 0.1490             |
| Largest diff. peak/hole / e Å <sup>-3</sup> | 0.67/-0.22                                                    |

**Alert level B**

THETM01\_ALERT\_3\_B The value of sine(theta\_max)/wavelength is less than 0.575

Calculated sin(theta\_max)/wavelength = 0.5612

**Author Response: Weak diffracted crystal**

PLAT230\_ALERT\_2\_B Hirshfeld Test Diff for C21 --C22 . 12.3 s.u.

**Author Response: Disordered n-butyl group in the molecule**

PLAT430\_ALERT\_2\_B Short Inter D...A Contact O4 ..O4 2.81 Ang.

**Author Response: Disordered nitro group in the molecule**

Table 2 Fractional Atomic Coordinates ( $\times 10^4$ ) and Equivalent Isotropic Displacement Parameters ( $\text{\AA}^2 \times 10^3$ ) for 6b.  $U_{\text{eq}}$  is defined as 1/3 of of the trace of the orthogonalised  $U_{\text{ij}}$  tensor.

| Atom | x        | y          | z          | U(eq)     |
|------|----------|------------|------------|-----------|
| O1   | 2968(5)  | 6063.8(17) | 9072(2)    | 120.4(12) |
| O2   | 2970(6)  | 6728.3(17) | 8254(2)    | 127.8(13) |
| O3   | 1557(4)  | 6287.9(12) | 5769.3(16) | 97.5(9)   |
| O4   | 1224(4)  | 5414.7(12) | 5369.5(15) | 86.8(8)   |
| N1   | 2795(5)  | 6223(2)    | 8434(3)    | 97.2(11)  |
| N2   | 1500(4)  | 5763.3(14) | 5878.6(19) | 72.9(8)   |
| N3   | 1305(4)  | 4541.3(12) | 6272.8(16) | 68.8(8)   |
| N4   | 1123(5)  | 3973.4(13) | 6488.7(17) | 78.2(9)   |
| C1   | 2392(5)  | 5790.6(17) | 7863(2)    | 72.2(10)  |
| C2   | 2128(5)  | 5961.9(16) | 7159(2)    | 68.3(9)   |
| C3   | 1755(4)  | 5553.0(14) | 6612.7(19) | 61.0(9)   |
| C4   | 1647(5)  | 4954.4(15) | 6776.6(19) | 62.2(9)   |
| C5   | 1929(5)  | 4805.7(17) | 7527(2)    | 77.6(10)  |
| C6   | 2293(5)  | 5213.6(18) | 8057(2)    | 79.5(11)  |
| C7   | 731(6)   | 3610.1(16) | 5984(2)    | 78.4(11)  |
| C8   | 420(7)   | 2984.0(16) | 6133(2)    | 93.0(13)  |
| C9   | 116(9)   | 2872.1(18) | 6906(2)    | 115.4(18) |
| C10  | 1754(6)  | 2594.8(15) | 5769.3(19) | 76.0(11)  |
| C11  | 3840(8)  | 2708(2)    | 6210(3)    | 111.8(16) |
| C12  | 1321(7)  | 1959.6(16) | 5854(2)    | 89.9(12)  |
| C13  | 2233(7)  | 1520.8(17) | 5415(3)    | 102.9(14) |
| C14  | 1785(9)  | 902.2(18)  | 5545(3)    | 122.3(18) |
| C15  | 2594(11) | 470(3)     | 5088(5)    | 179(3)    |
| C16  | 1881(7)  | 2756.1(15) | 5004(2)    | 80.9(11)  |
| C17  | 3120(6)  | 2954.4(16) | 4636(2)    | 77.7(11)  |
| C18  | 3179(7)  | 3082.2(17) | 3868(2)    | 85.8(12)  |
| C19  | 4711(7)  | 2740.3(19) | 3539(2)    | 103.4(15) |
| C20  | 4809(11) | 2098(2)    | 3692(3)    | 152(3)    |
| C21  | 6530(16) | 1795(3)    | 3450(5)    | 214(5)    |
| C22  | 6984(18) | 1256(6)    | 3770(6)    | 281(6)    |
| C23  | 3256(5)  | 3723.8(17) | 3688(2)    | 73.5(10)  |
| C24  | 3582(6)  | 4147.8(17) | 4217(2)    | 82.2(11)  |
| C25  | 3624(6)  | 4731.3(18) | 4032(2)    | 85.0(11)  |
| C26  | 3336(5)  | 4913.5(19) | 3332(3)    | 80.9(11)  |
| C27  | 2993(5)  | 4491(2)    | 2806(2)    | 87.4(12)  |
| C28  | 2960(6)  | 3913(2)    | 2976(2)    | 83.1(11)  |
| C29  | 3393(7)  | 5543.4(19) | 3131(3)    | 114.9(17) |

Table 3 Anisotropic Displacement Parameters ( $\text{\AA}^2 \times 10^3$ ) for 6b. The Anisotropic displacement factor exponent takes the form:  $-2\pi^2[h^2a^*2U_{11}+2hka^*b^*U_{12}+\dots]$ .

| Atom | U <sub>11</sub> | U <sub>22</sub> | U <sub>33</sub> | U <sub>23</sub> | U <sub>13</sub> | U <sub>12</sub> |
|------|-----------------|-----------------|-----------------|-----------------|-----------------|-----------------|
| O1   | 118(3)          | 151(3)          | 90(2)           | -30(2)          | 7.1(19)         | -9(2)           |
| O2   | 154(3)          | 100(3)          | 131(3)          | -37(2)          | 21(2)           | -19(2)          |
| O3   | 113(2)          | 65.4(18)        | 107(2)          | 19.5(15)        | -14.4(17)       | -1.8(15)        |
| O4   | 109(2)          | 73.3(17)        | 75.5(17)        | 5.8(15)         | -1.5(15)        | 2.2(15)         |
| N1   | 80(2)           | 110(3)          | 101(3)          | -22(3)          | 10(2)           | -8(2)           |
| N2   | 66.3(19)        | 63(2)           | 87(2)           | 10.5(18)        | 0.5(16)         | 4.1(15)         |
| N3   | 88(2)           | 55.0(18)        | 64.6(18)        | 4.8(14)         | 13.4(15)        | 7.2(14)         |
| N4   | 105(2)          | 61.6(19)        | 71(2)           | 4.4(16)         | 22.4(17)        | 6.7(16)         |
| C1   | 56(2)           | 81(3)           | 79(3)           | -18(2)          | 9.1(18)         | -2.6(18)        |
| C2   | 47.5(19)        | 69(2)           | 89(3)           | 0(2)            | 7.7(17)         | 2.0(16)         |
| C3   | 49.6(18)        | 63(2)           | 70(2)           | 3.5(18)         | 3.6(15)         | 6.0(15)         |
| C4   | 54.9(19)        | 65(2)           | 67(2)           | 4.2(18)         | 9.1(15)         | 9.3(16)         |
| C5   | 85(3)           | 73(2)           | 75(3)           | 6(2)            | 11(2)           | 7(2)            |
| C6   | 80(3)           | 89(3)           | 69(2)           | 2(2)            | 9.5(19)         | 3(2)            |
| C7   | 100(3)          | 65(2)           | 75(3)           | 6(2)            | 28(2)           | 11(2)           |
| C8   | 129(4)          | 65(2)           | 93(3)           | -1(2)           | 45(3)           | 1(2)            |
| C9   | 190(5)          | 75(3)           | 94(3)           | 5(2)            | 72(3)           | 2(3)            |
| C10  | 106(3)          | 60(2)           | 64(2)           | 7.8(17)         | 21(2)           | 19(2)           |
| C11  | 138(4)          | 101(3)          | 92(3)           | 2(3)            | -4(3)           | 26(3)           |
| C12  | 128(4)          | 63(2)           | 84(3)           | 1(2)            | 31(2)           | 2(2)            |
| C13  | 129(4)          | 68(3)           | 114(3)          | -7(2)           | 20(3)           | 17(2)           |
| C14  | 149(5)          | 70(3)           | 153(5)          | -15(3)          | 36(4)           | 1(3)            |
| C15  | 192(7)          | 93(4)           | 259(9)          | -66(5)          | 53(6)           | 14(4)           |
| C16  | 108(3)          | 59(2)           | 80(3)           | -6.7(19)        | 29(2)           | -3(2)           |
| C17  | 97(3)           | 70(2)           | 68(2)           | -1.7(19)        | 19(2)           | 7(2)            |
| C18  | 105(3)          | 81(3)           | 77(3)           | -9(2)           | 32(2)           | -13(2)          |
| C19  | 136(4)          | 89(3)           | 94(3)           | -10(2)          | 50(3)           | 0(3)            |
| C20  | 246(8)          | 80(3)           | 151(5)          | -13(3)          | 110(5)          | 5(4)            |
| C21  | 374(13)         | 109(5)          | 192(7)          | 31(5)           | 164(9)          | 92(7)           |
| C22  | 321(15)         | 326(15)         | 195(9)          | -40(10)         | 34(9)           | 146(13)         |
| C23  | 75(2)           | 79(2)           | 70(2)           | -4(2)           | 24.5(18)        | -7.8(19)        |
| C24  | 102(3)          | 78(3)           | 70(2)           | 3(2)            | 23(2)           | -5(2)           |
| C25  | 92(3)           | 74(3)           | 91(3)           | -9(2)           | 21(2)           | -7(2)           |
| C26  | 60(2)           | 90(3)           | 96(3)           | 17(3)           | 21(2)           | 9(2)            |
| C27  | 67(2)           | 117(4)          | 79(3)           | 25(3)           | 14(2)           | 8(2)            |
| C28  | 76(3)           | 108(3)          | 68(3)           | -4(2)           | 18.9(19)        | -4(2)           |
| C29  | 98(3)           | 94(3)           | 159(5)          | 40(3)           | 40(3)           | 18(3)           |

Table 4 Bond Lengths for 6b.

| Atom | Atom | Length/Å | Atom | Atom | Length/Å  |
|------|------|----------|------|------|-----------|
| O1   | N1   | 1.224(5) | C10  | C12  | 1.508(5)  |
| O2   | N1   | 1.223(5) | C10  | C16  | 1.474(5)  |
| O3   | N2   | 1.227(4) | C12  | C13  | 1.489(5)  |
| O4   | N2   | 1.234(4) | C13  | C14  | 1.486(6)  |
| N1   | C1   | 1.452(5) | C14  | C15  | 1.463(7)  |
| N2   | C3   | 1.429(4) | C16  | C17  | 1.254(5)  |
| N3   | N4   | 1.379(4) | C17  | C18  | 1.453(5)  |
| N3   | C4   | 1.332(4) | C18  | C19  | 1.521(6)  |
| N4   | C7   | 1.258(5) | C18  | C23  | 1.518(5)  |
| C1   | C2   | 1.349(5) | C19  | C20  | 1.508(6)  |
| C1   | C6   | 1.381(5) | C20  | C21  | 1.511(9)  |
| C2   | C3   | 1.382(5) | C21  | C22  | 1.397(12) |
| C3   | C4   | 1.417(5) | C23  | C24  | 1.381(5)  |
| C4   | C5   | 1.416(5) | C23  | C28  | 1.376(5)  |
| C5   | C6   | 1.359(5) | C24  | C25  | 1.389(5)  |
| C7   | C8   | 1.490(5) | C25  | C26  | 1.350(6)  |
| C8   | C9   | 1.490(6) | C26  | C27  | 1.375(6)  |
| C8   | C10  | 1.513(5) | C26  | C29  | 1.500(6)  |
| C10  | C11  | 1.610(6) | C27  | C28  | 1.370(6)  |

Table 5 Bond Angles for 6b.

| Atom | Atom | Atom | Angle/°  | Atom | Atom | Atom | Angle/°  |
|------|------|------|----------|------|------|------|----------|
| O1   | N1   | C1   | 118.7(4) | C12  | C10  | C11  | 106.7(3) |
| O2   | N1   | O1   | 123.0(4) | C16  | C10  | C8   | 112.9(3) |
| O2   | N1   | C1   | 118.3(4) | C16  | C10  | C11  | 106.5(3) |
| O3   | N2   | O4   | 121.5(3) | C16  | C10  | C12  | 112.4(3) |
| O3   | N2   | C3   | 119.1(3) | C13  | C12  | C10  | 119.8(4) |
| O4   | N2   | C3   | 119.4(3) | C14  | C13  | C12  | 116.8(4) |
| C4   | N3   | N4   | 119.5(3) | C15  | C14  | C13  | 117.1(5) |
| C7   | N4   | N3   | 116.0(3) | C17  | C16  | C10  | 137.5(4) |
| C2   | C1   | N1   | 119.3(4) | C16  | C17  | C18  | 134.9(4) |
| C2   | C1   | C6   | 121.7(4) | C17  | C18  | C19  | 113.0(4) |
| C6   | C1   | N1   | 119.0(4) | C17  | C18  | C23  | 114.7(3) |
| C1   | C2   | C3   | 119.7(3) | C23  | C18  | C19  | 111.8(3) |
| C2   | C3   | N2   | 116.8(3) | C20  | C19  | C18  | 116.9(4) |
| C2   | C3   | C4   | 121.3(3) | C19  | C20  | C21  | 114.7(5) |

|     |     |     |          |     |     |     |          |
|-----|-----|-----|----------|-----|-----|-----|----------|
| C4  | C3  | N2  | 121.9(3) | C22 | C21 | C20 | 115.8(7) |
| N3  | C4  | C3  | 123.9(3) | C24 | C23 | C18 | 122.8(4) |
| N3  | C4  | C5  | 120.1(3) | C28 | C23 | C18 | 120.8(4) |
| C5  | C4  | C3  | 116.1(3) | C28 | C23 | C24 | 116.4(4) |
| C6  | C5  | C4  | 121.9(4) | C23 | C24 | C25 | 121.2(4) |
| C5  | C6  | C1  | 119.4(4) | C26 | C25 | C24 | 122.1(4) |
| N4  | C7  | C8  | 122.1(4) | C25 | C26 | C27 | 116.6(4) |
| C7  | C8  | C10 | 112.3(3) | C25 | C26 | C29 | 122.1(5) |
| C9  | C8  | C7  | 112.7(3) | C27 | C26 | C29 | 121.2(4) |
| C9  | C8  | C10 | 119.4(4) | C28 | C27 | C26 | 122.2(4) |
| C8  | C10 | C11 | 104.8(3) | C27 | C28 | C23 | 121.4(4) |
| C12 | C10 | C8  | 112.7(3) |     |     |     |          |

Table 6 Hydrogen Atom Coordinates ( $\text{\AA}\times 10^4$ ) and Isotropic Displacement Parameters ( $\text{\AA}^2\times 10^3$ ) for 6b.

| Atom | x     | y    | z    | U(eq) |
|------|-------|------|------|-------|
| H3   | 1198  | 4628 | 5816 | 83    |
| H2   | 2196  | 6353 | 7042 | 82    |
| H5   | 1864  | 4418 | 7660 | 93    |
| H6   | 2472  | 5105 | 8546 | 95    |
| H7   | 632   | 3736 | 5502 | 94    |
| H8   | -837  | 2904 | 5861 | 112   |
| H9A  | 1185  | 3020 | 7225 | 173   |
| H9B  | 1     | 2462 | 6981 | 173   |
| H9C  | -1035 | 3062 | 7009 | 173   |
| H11A | 4139  | 3114 | 6195 | 168   |
| H11B | 4780  | 2490 | 5989 | 168   |
| H11C | 3844  | 2588 | 6708 | 168   |
| H12A | 1662  | 1861 | 6365 | 108   |
| H12B | -54   | 1912 | 5749 | 108   |
| H13A | 1857  | 1605 | 4902 | 123   |
| H13B | 3610  | 1570 | 5508 | 123   |
| H14A | 2225  | 813  | 6051 | 147   |
| H14B | 404   | 858  | 5478 | 147   |
| H15A | 1884  | 470  | 4610 | 269   |
| H15B | 2518  | 93   | 5304 | 269   |
| H15C | 3908  | 563  | 5052 | 269   |
| H16  | 724   | 2694 | 4713 | 97    |
| H17  | 4268  | 3039 | 4921 | 93    |
| H18  | 1956  | 2944 | 3617 | 103   |

|      |      |      |      |     |
|------|------|------|------|-----|
| H19A | 4512 | 2794 | 3013 | 124 |
| H19B | 5946 | 2908 | 3714 | 124 |
| H20A | 3659 | 1917 | 3449 | 182 |
| H20B | 4817 | 2038 | 4213 | 182 |
| H21A | 6309 | 1744 | 2925 | 257 |
| H21B | 7632 | 2048 | 3555 | 257 |
| H22A | 8015 | 1084 | 3549 | 421 |
| H22B | 5882 | 1007 | 3697 | 421 |
| H22C | 7366 | 1305 | 4284 | 421 |
| H24  | 3778 | 4041 | 4706 | 99  |
| H25  | 3859 | 5005 | 4402 | 102 |
| H27  | 2775 | 4602 | 2318 | 105 |
| H28  | 2733 | 3642 | 2601 | 100 |
| H29A | 2142 | 5666 | 2920 | 172 |
| H29B | 4288 | 5599 | 2784 | 172 |
| H29C | 3784 | 5769 | 3561 | 172 |

# NMR spectra of vinyl halides 2h-j

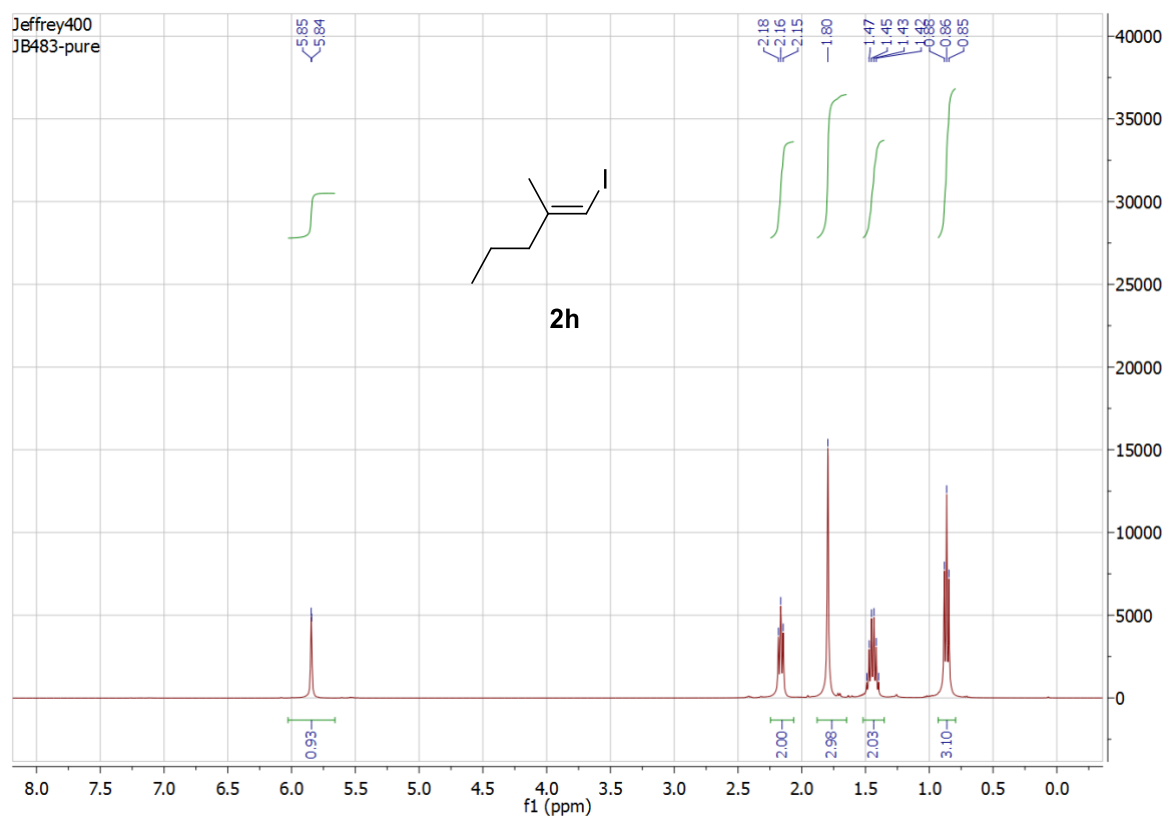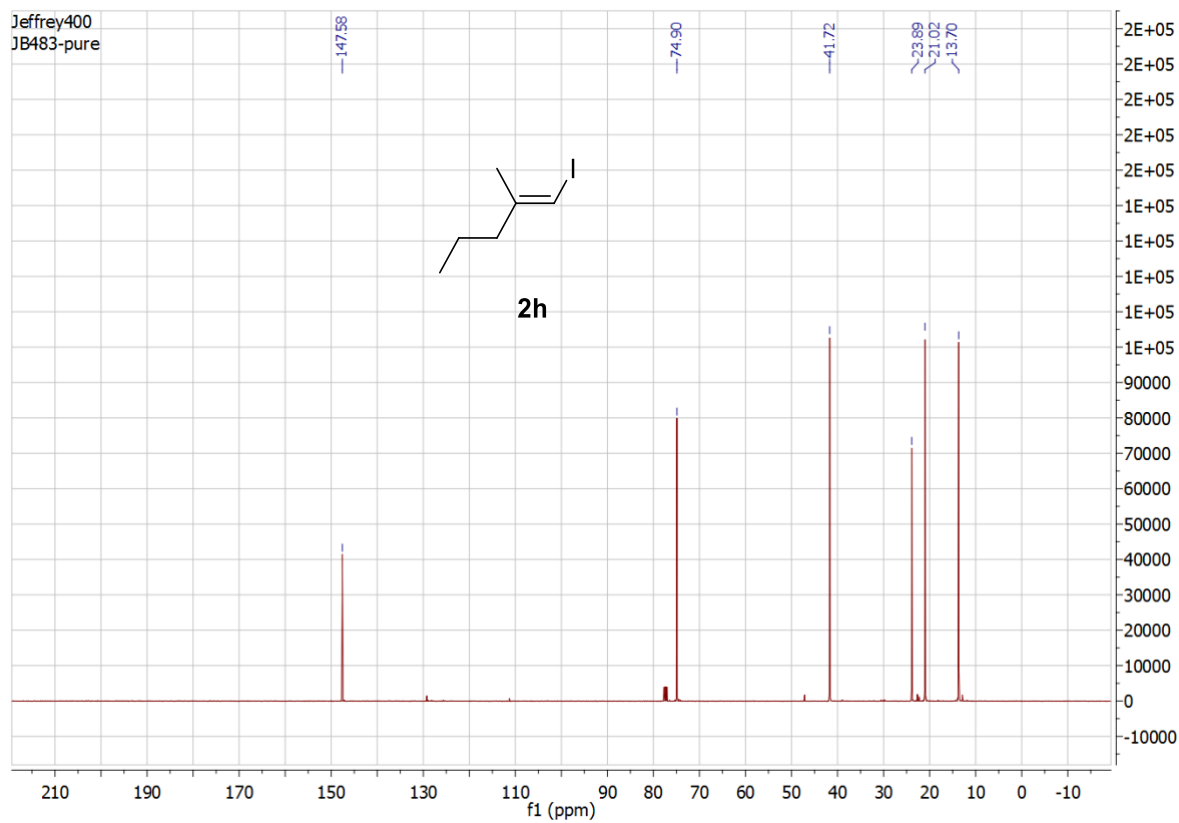



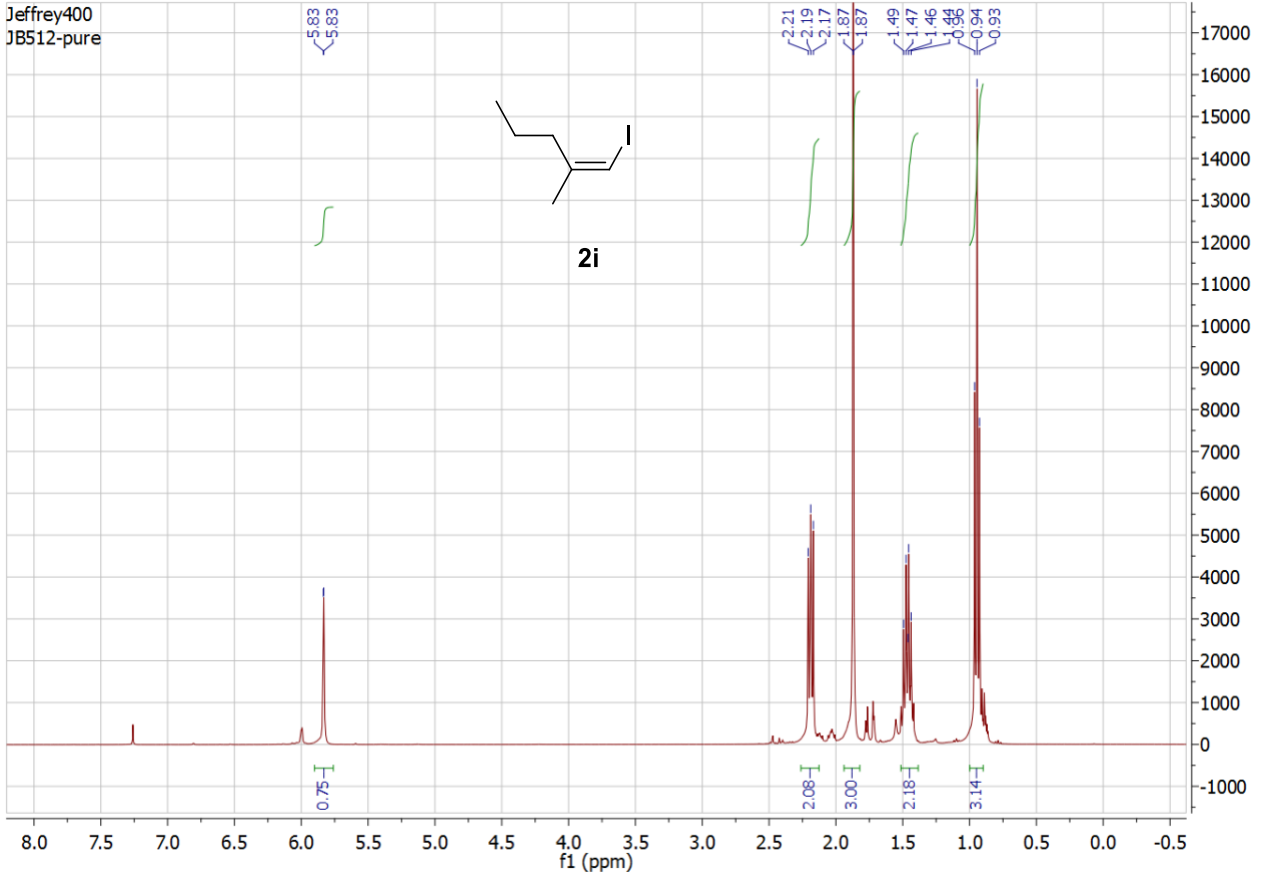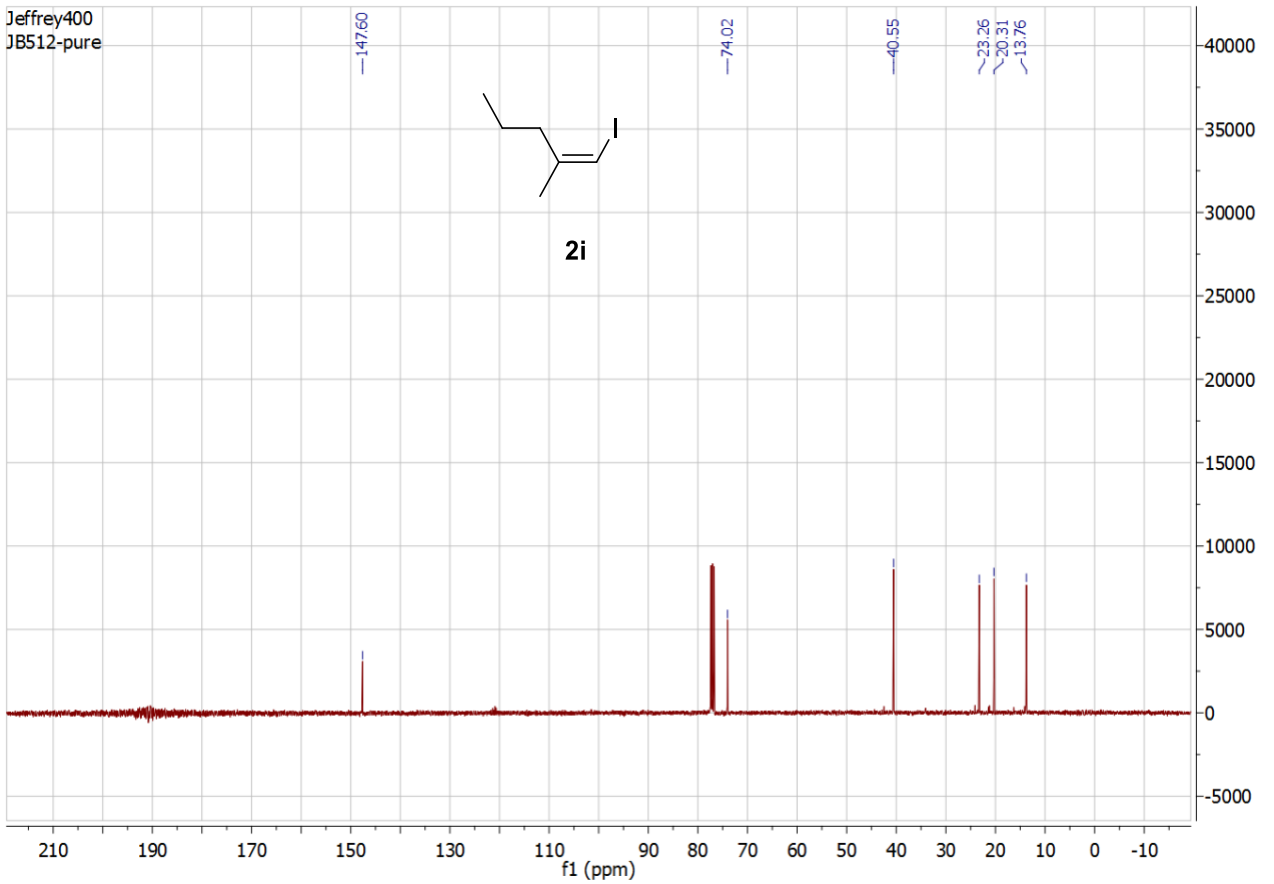

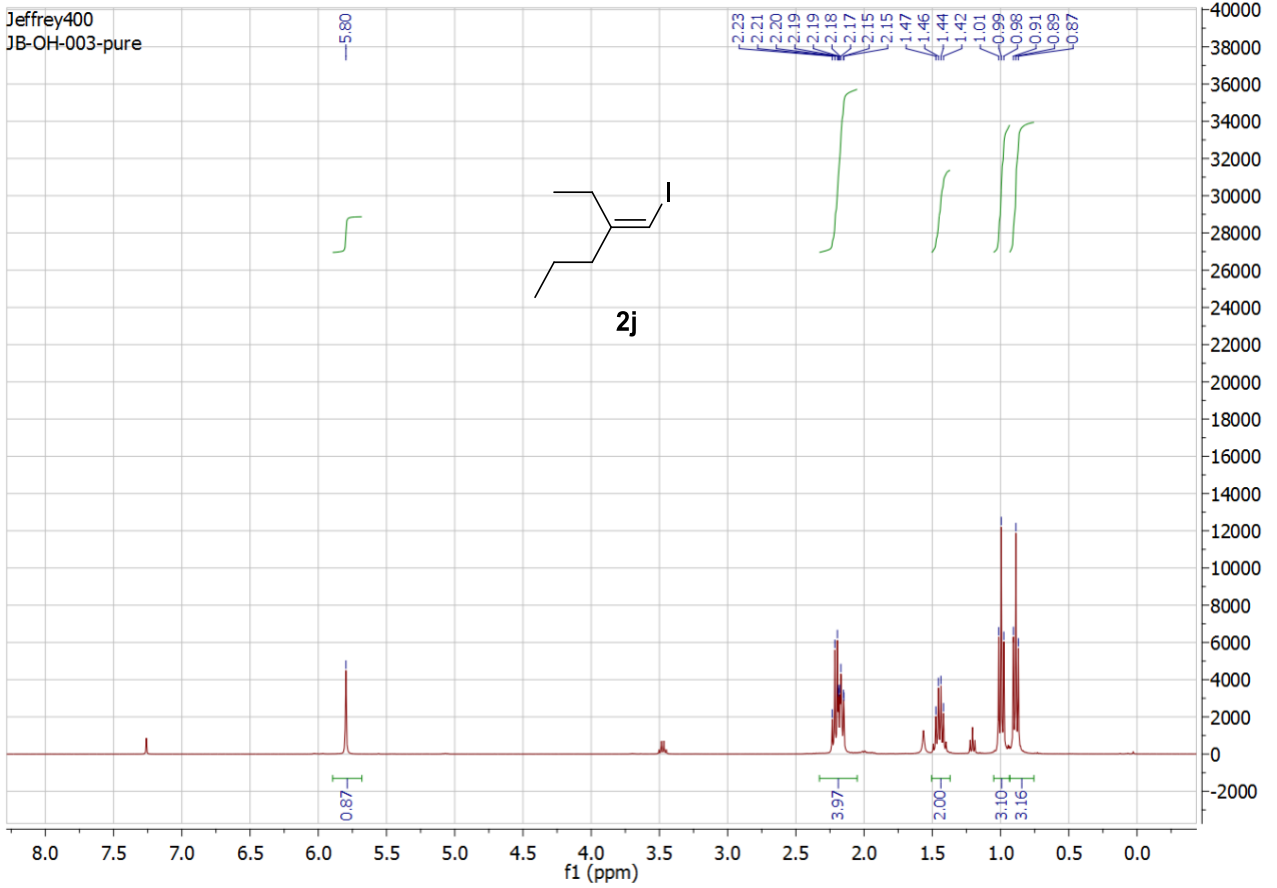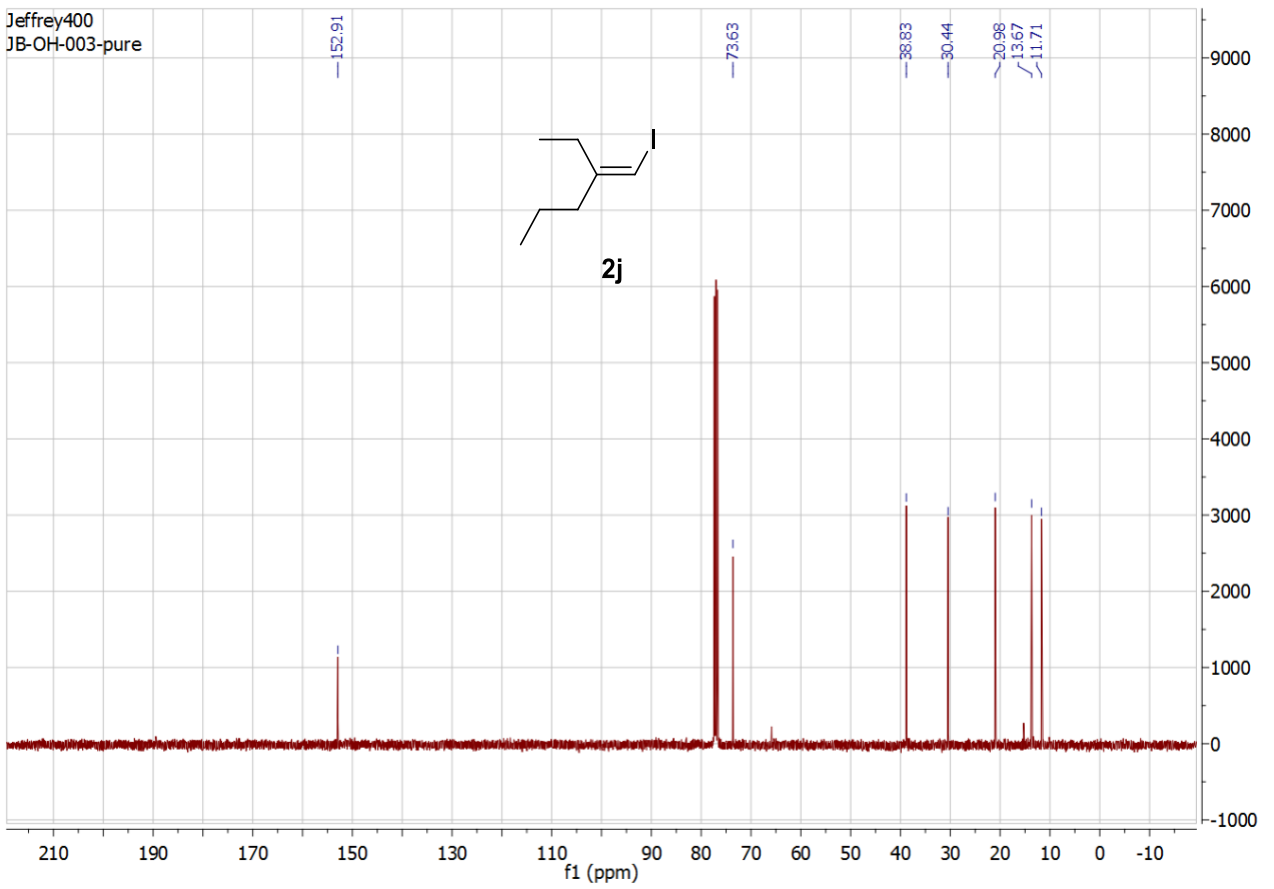

# NMR spectras of vinylicyclopropylcarbinols 3b-v

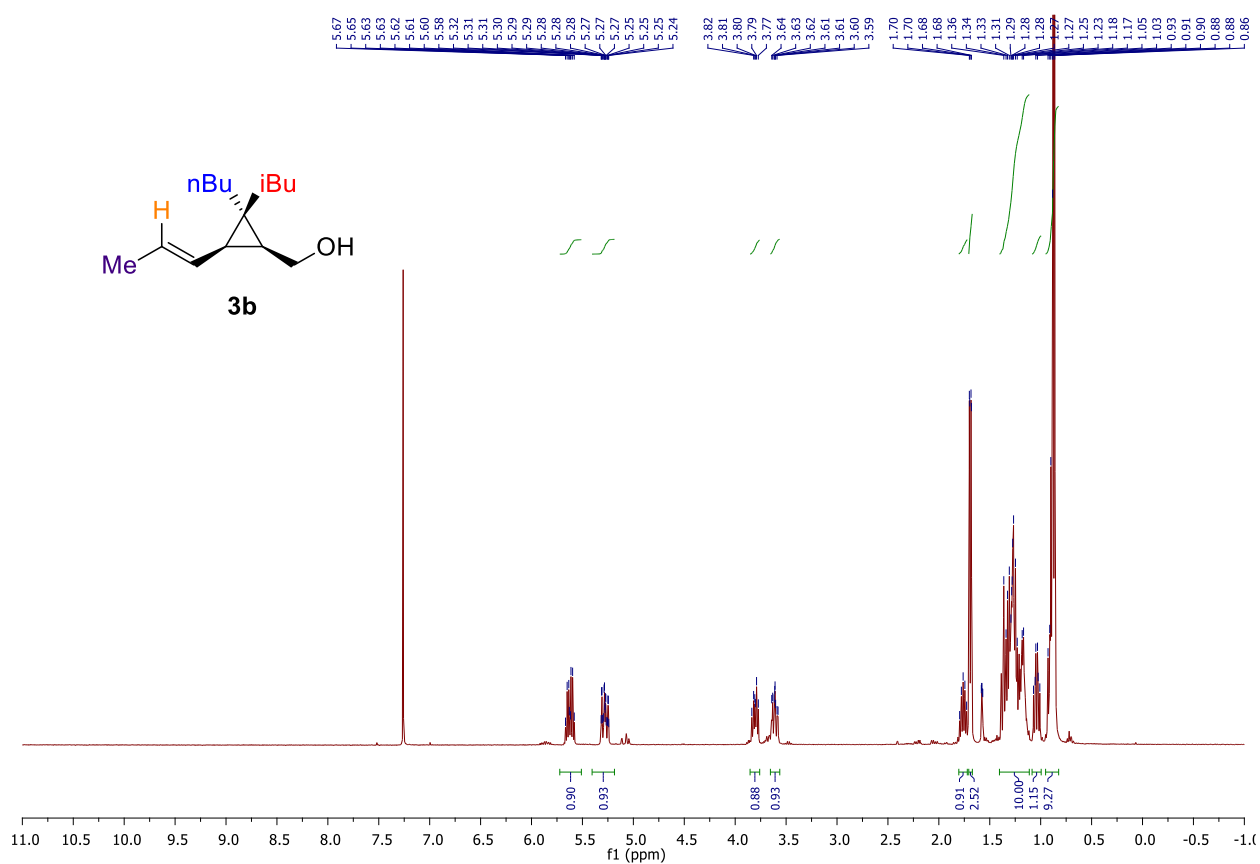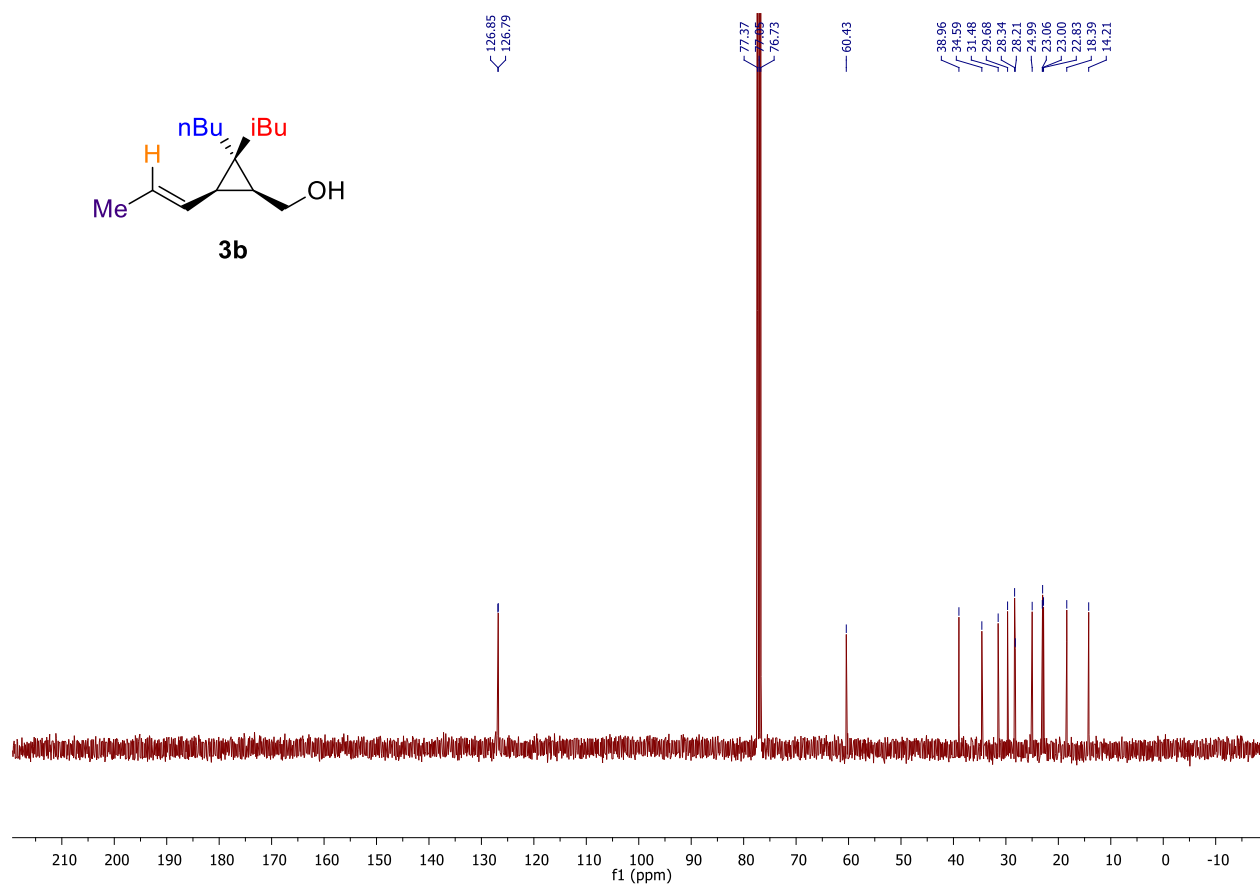

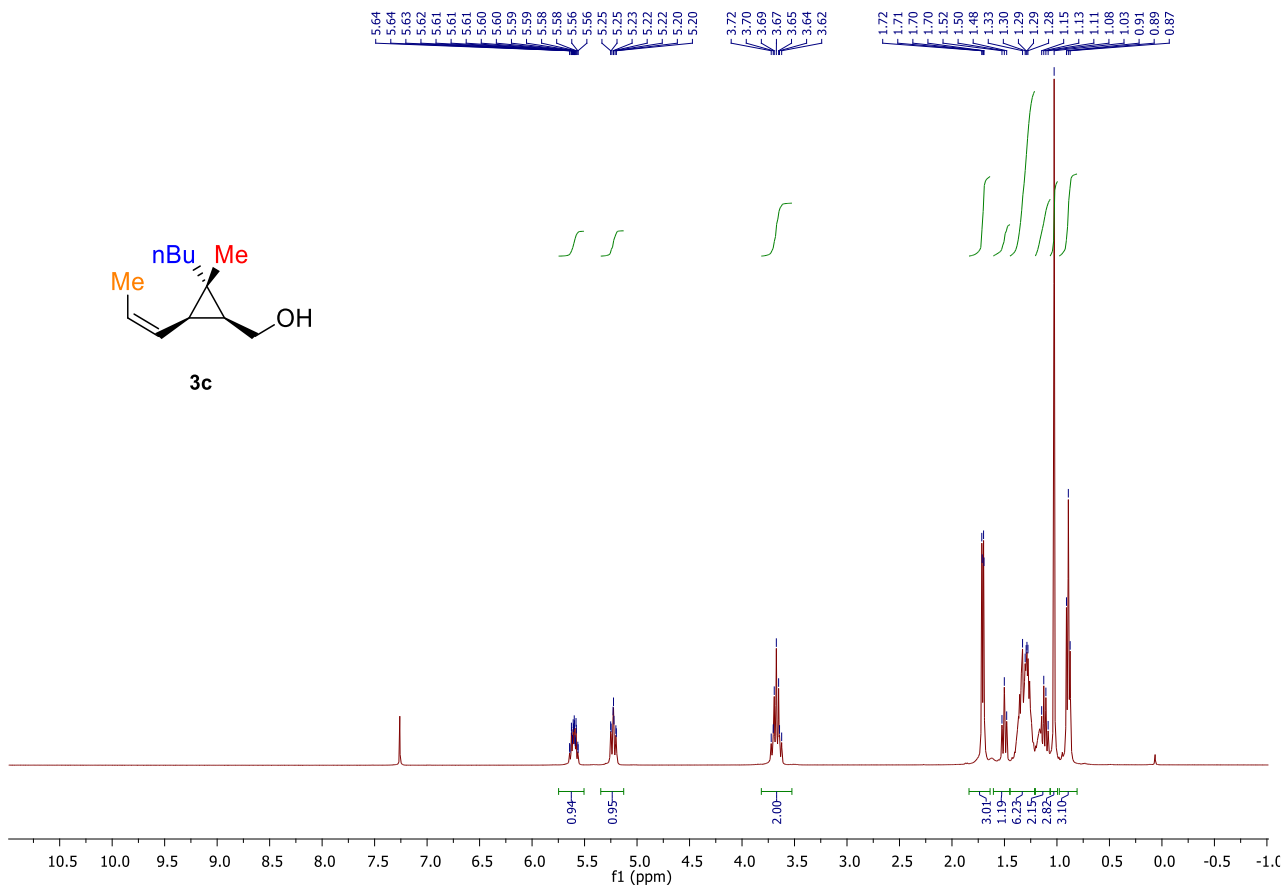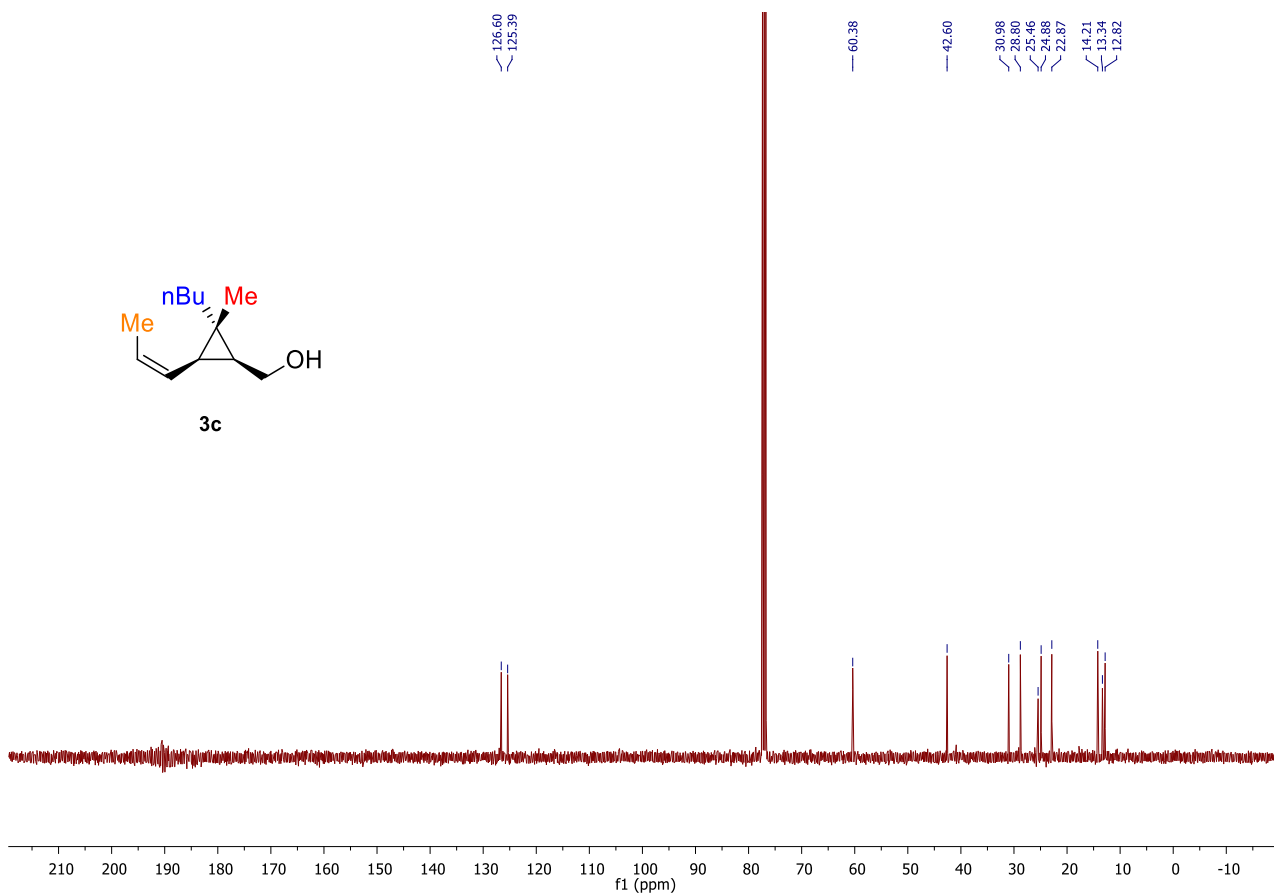

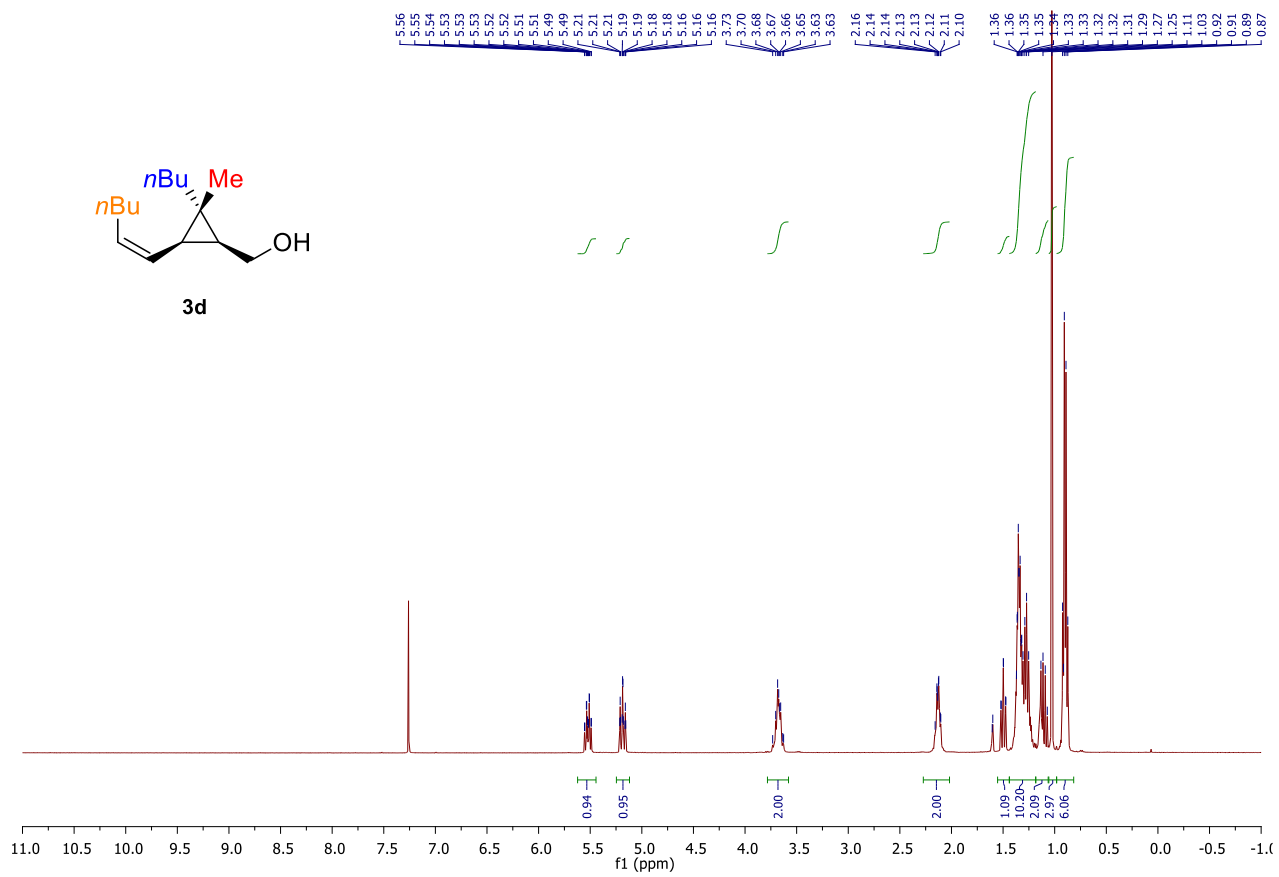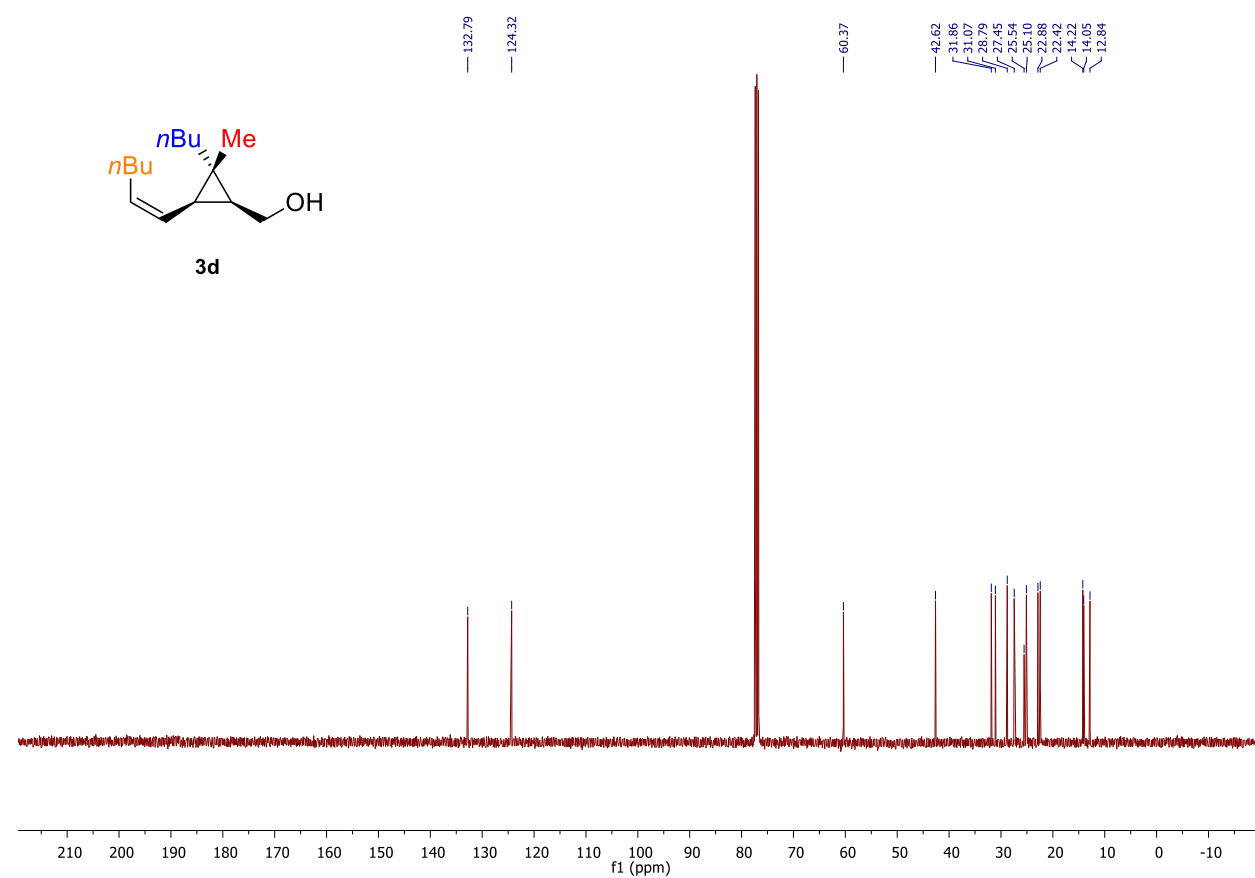

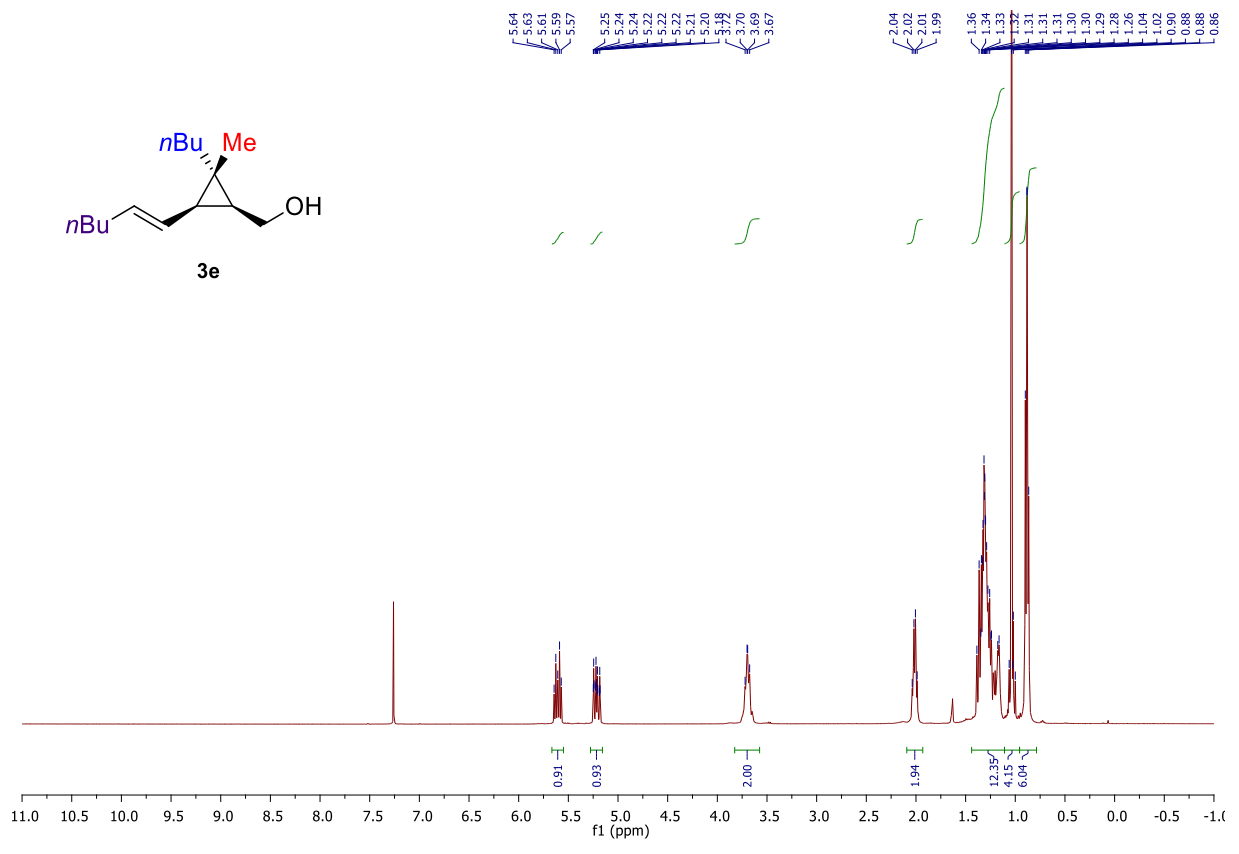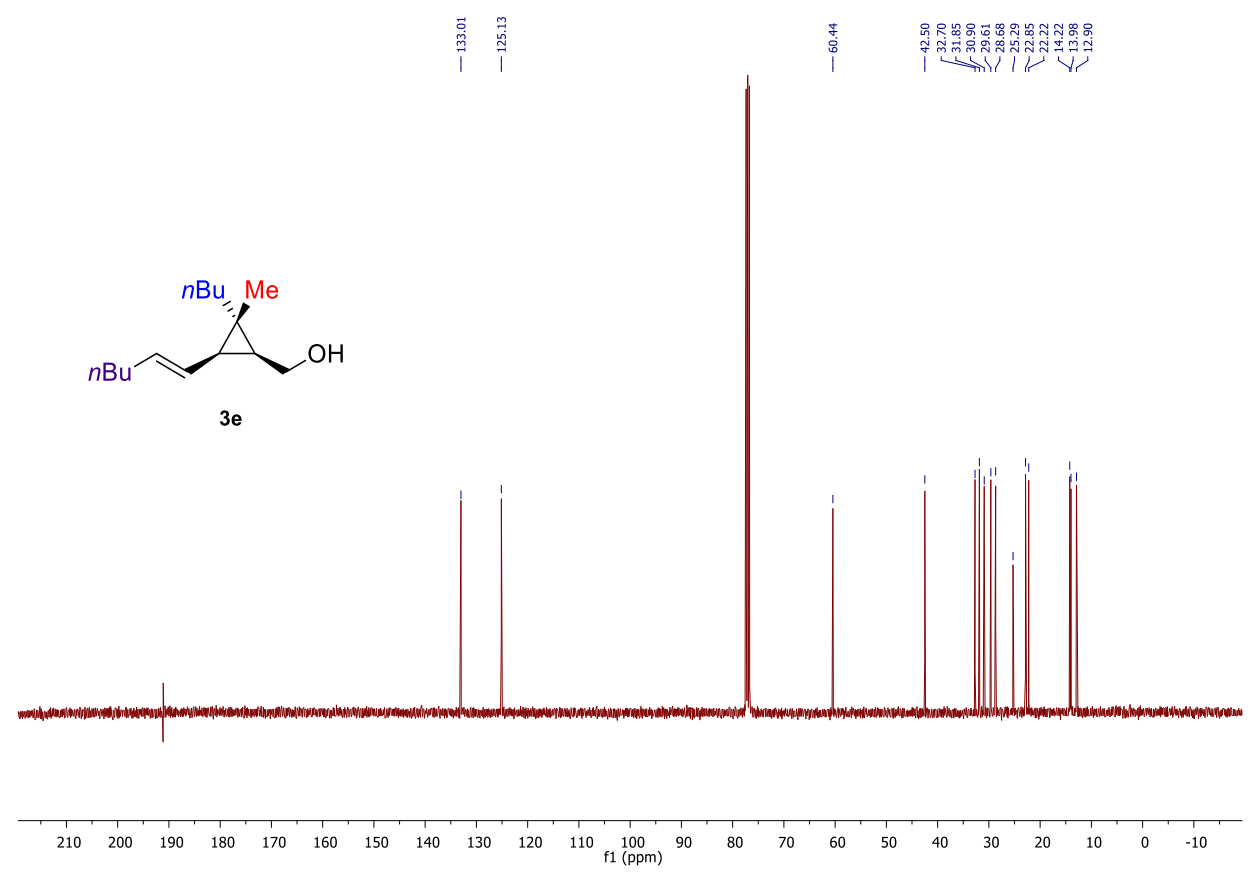

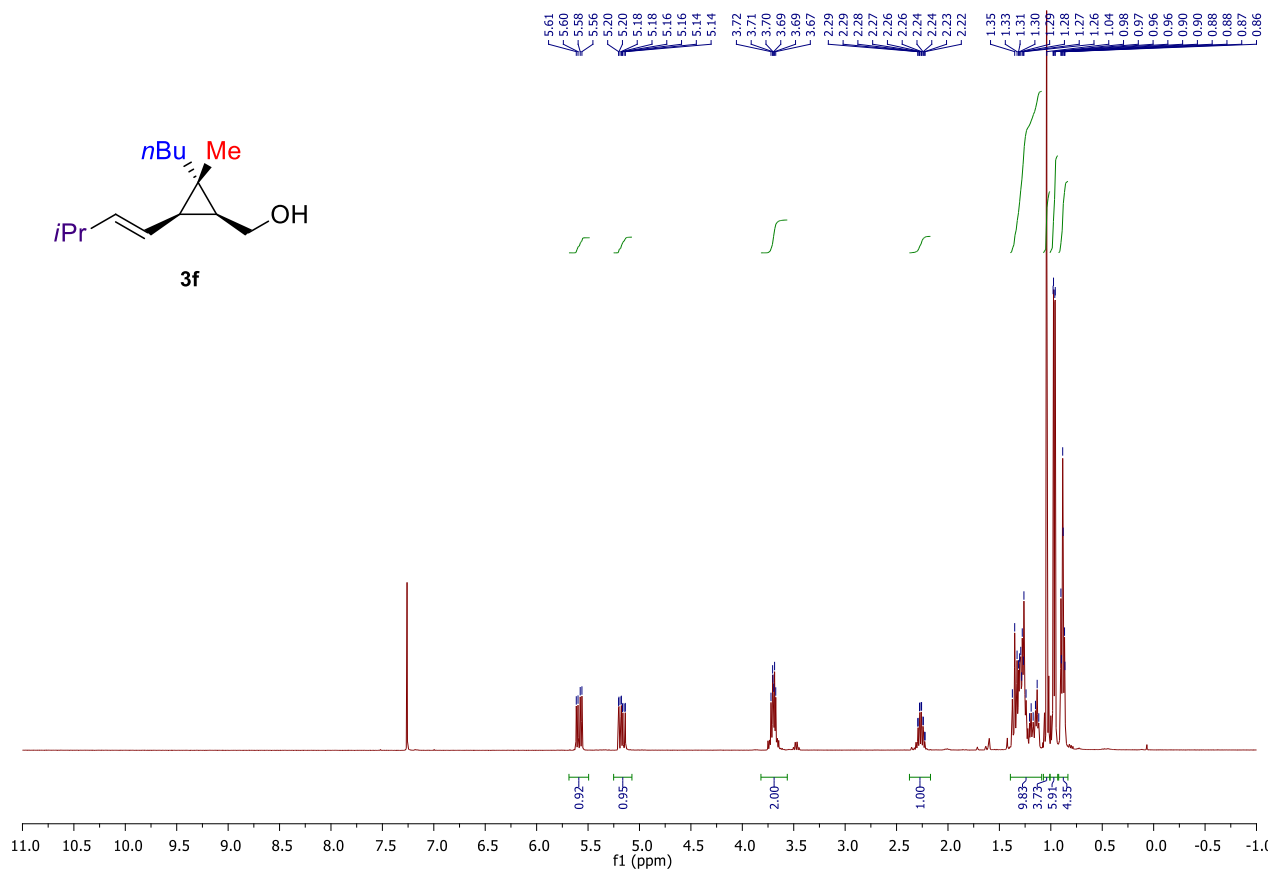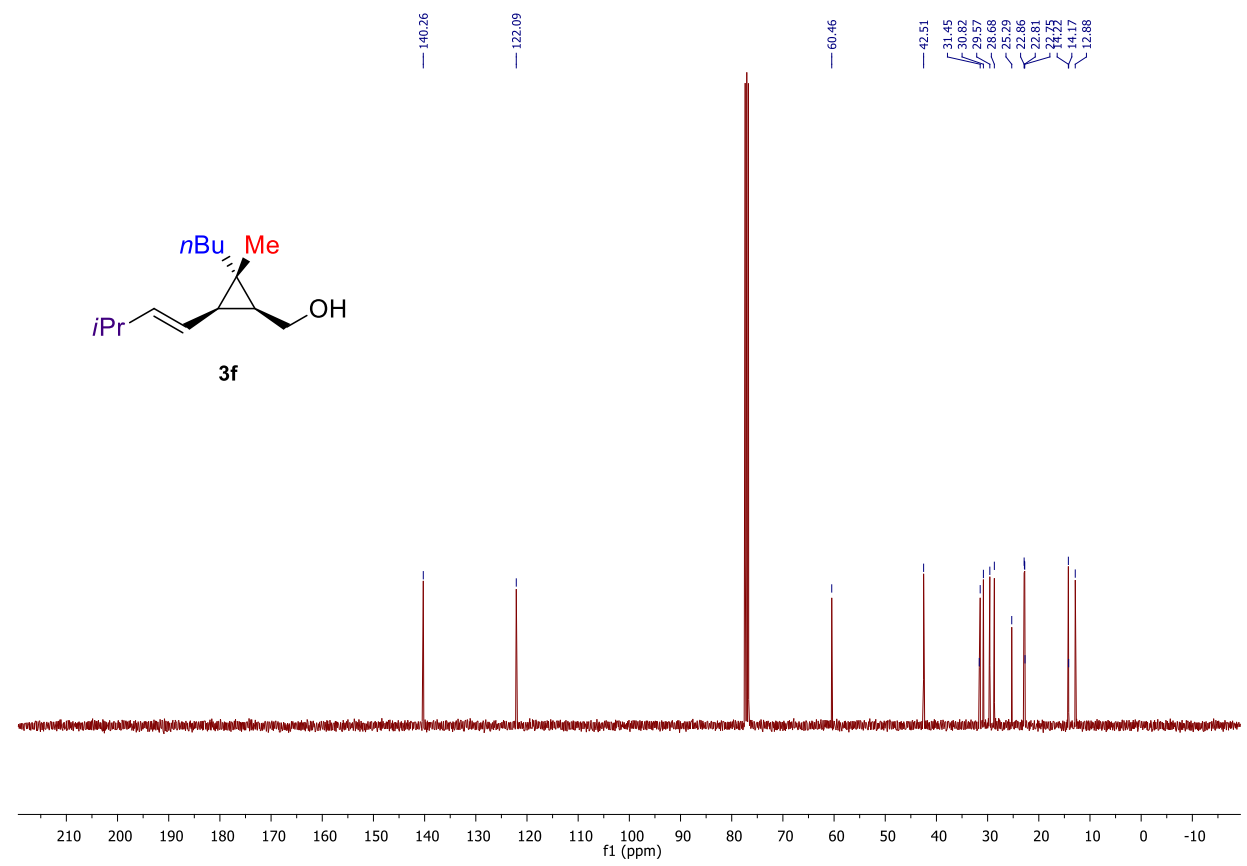

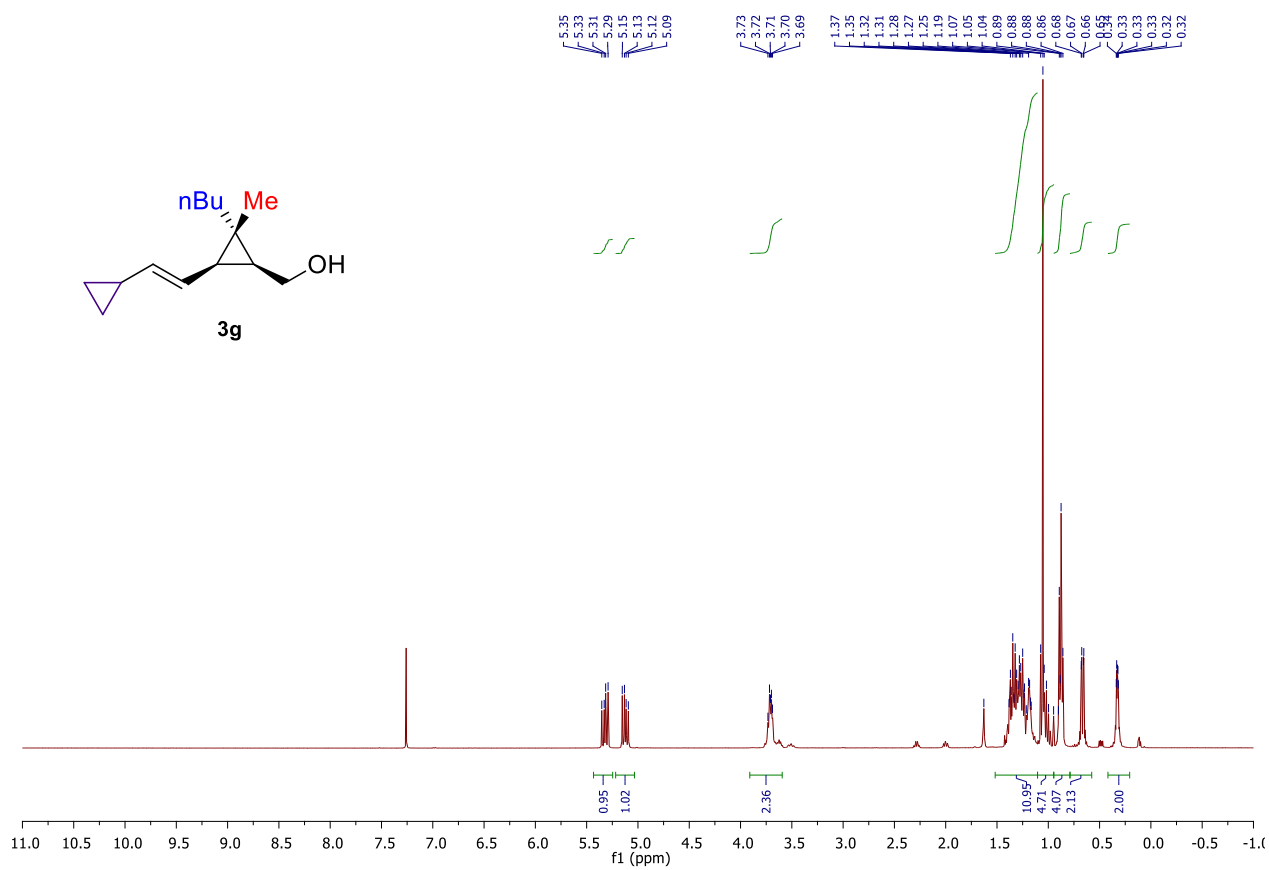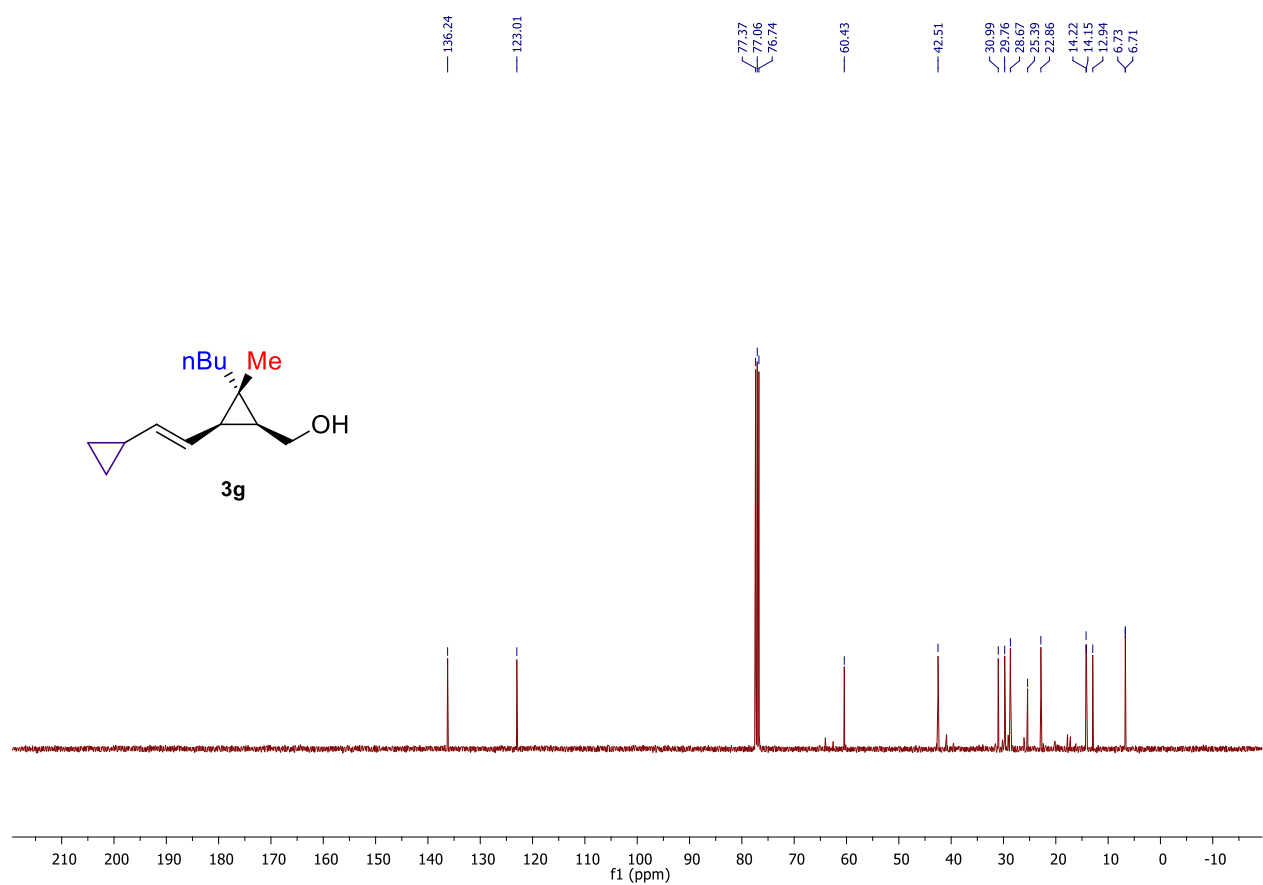



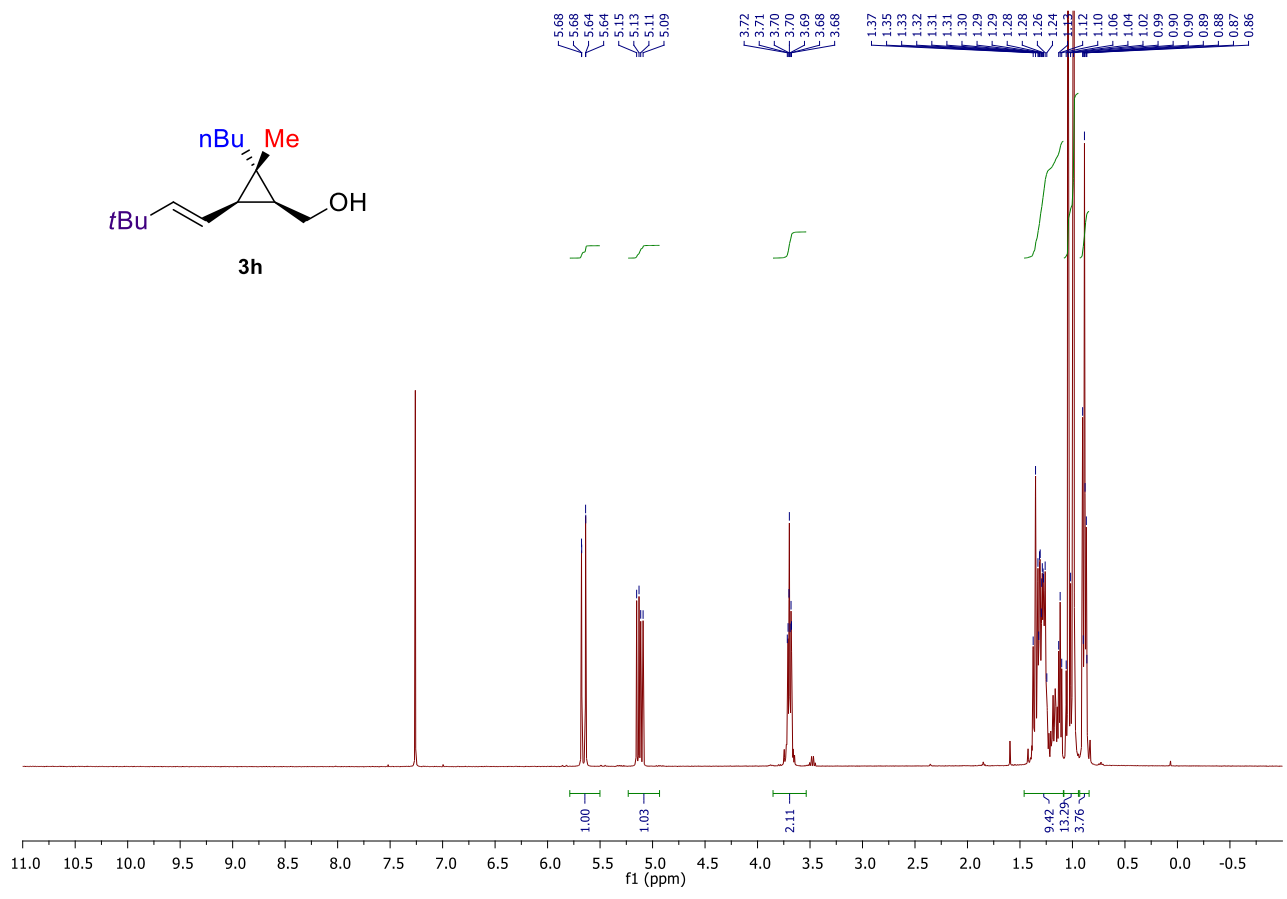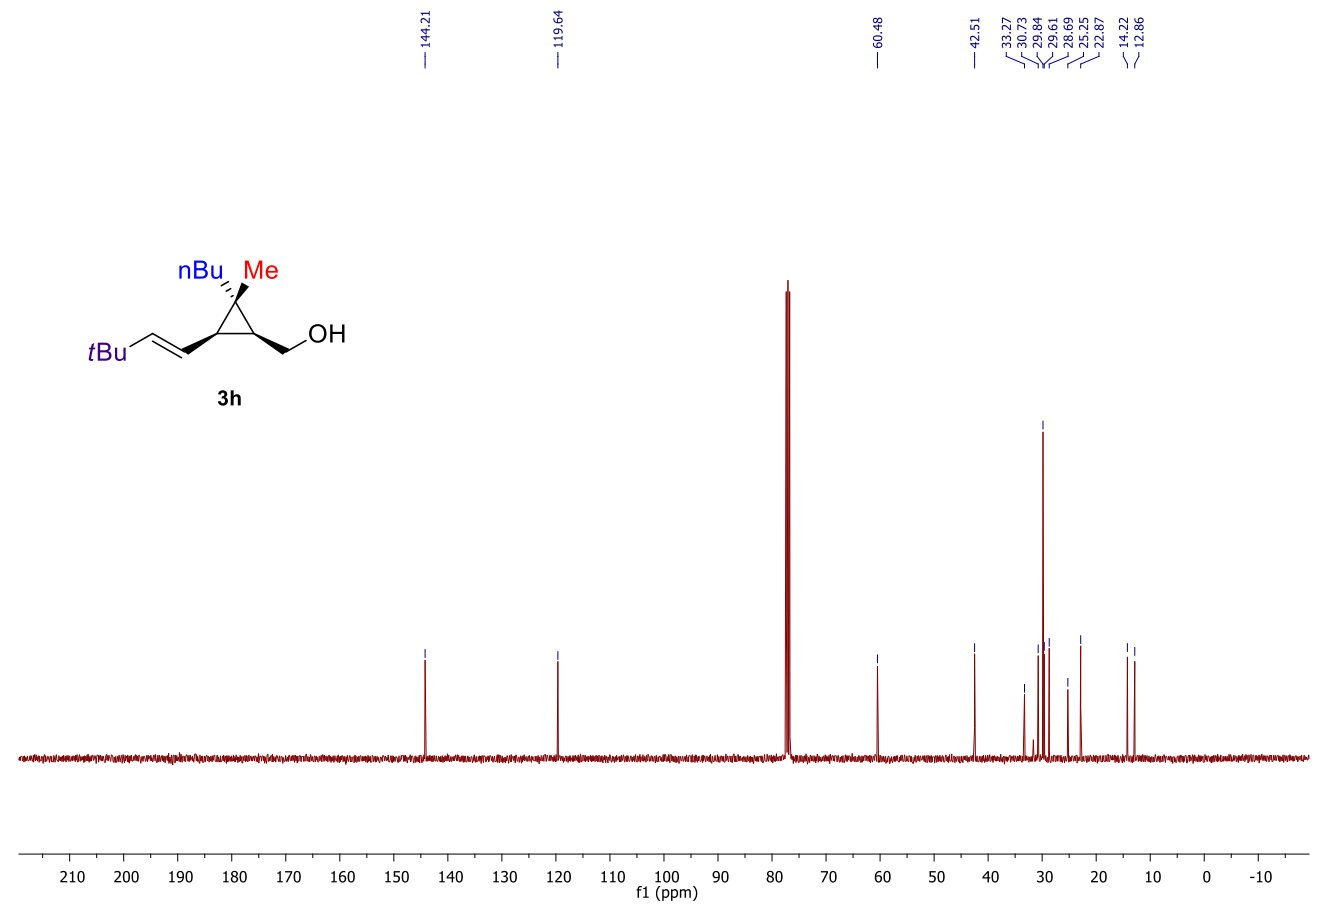

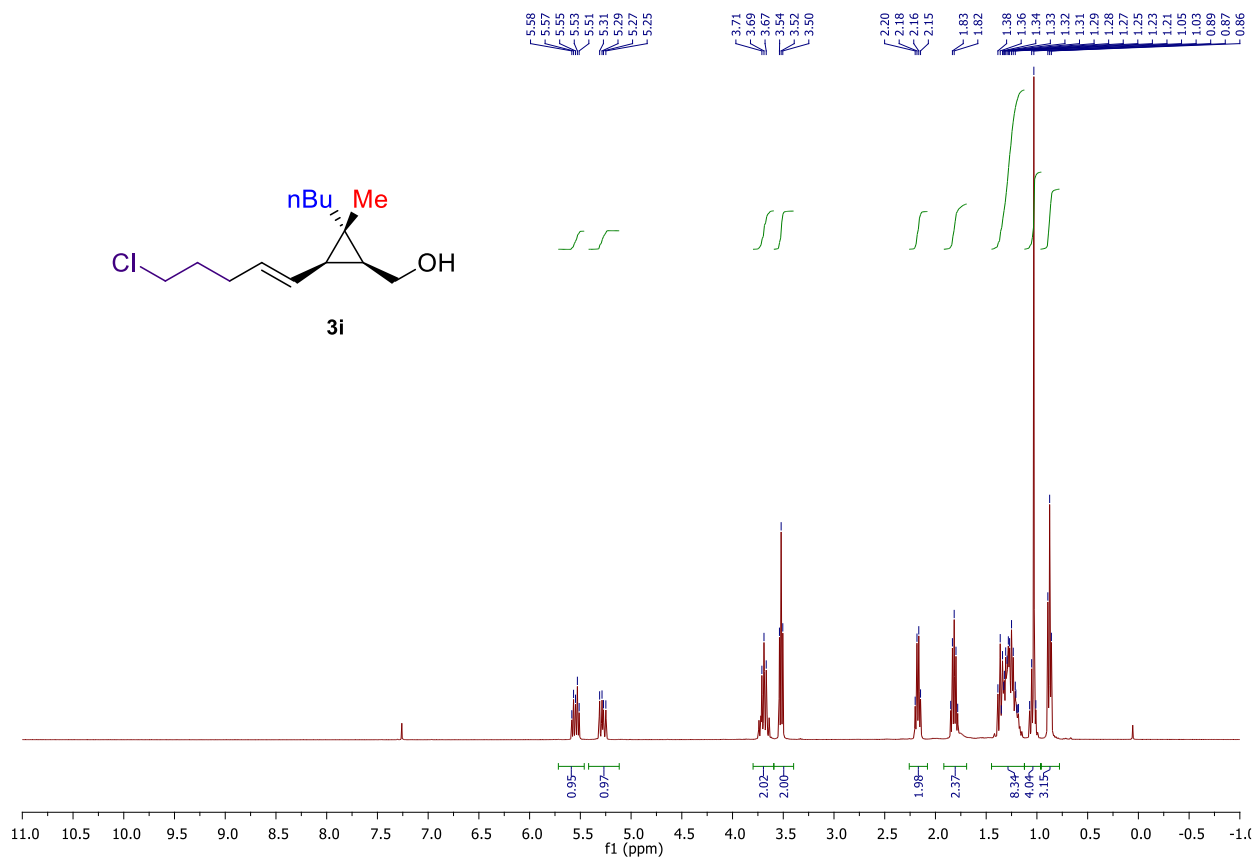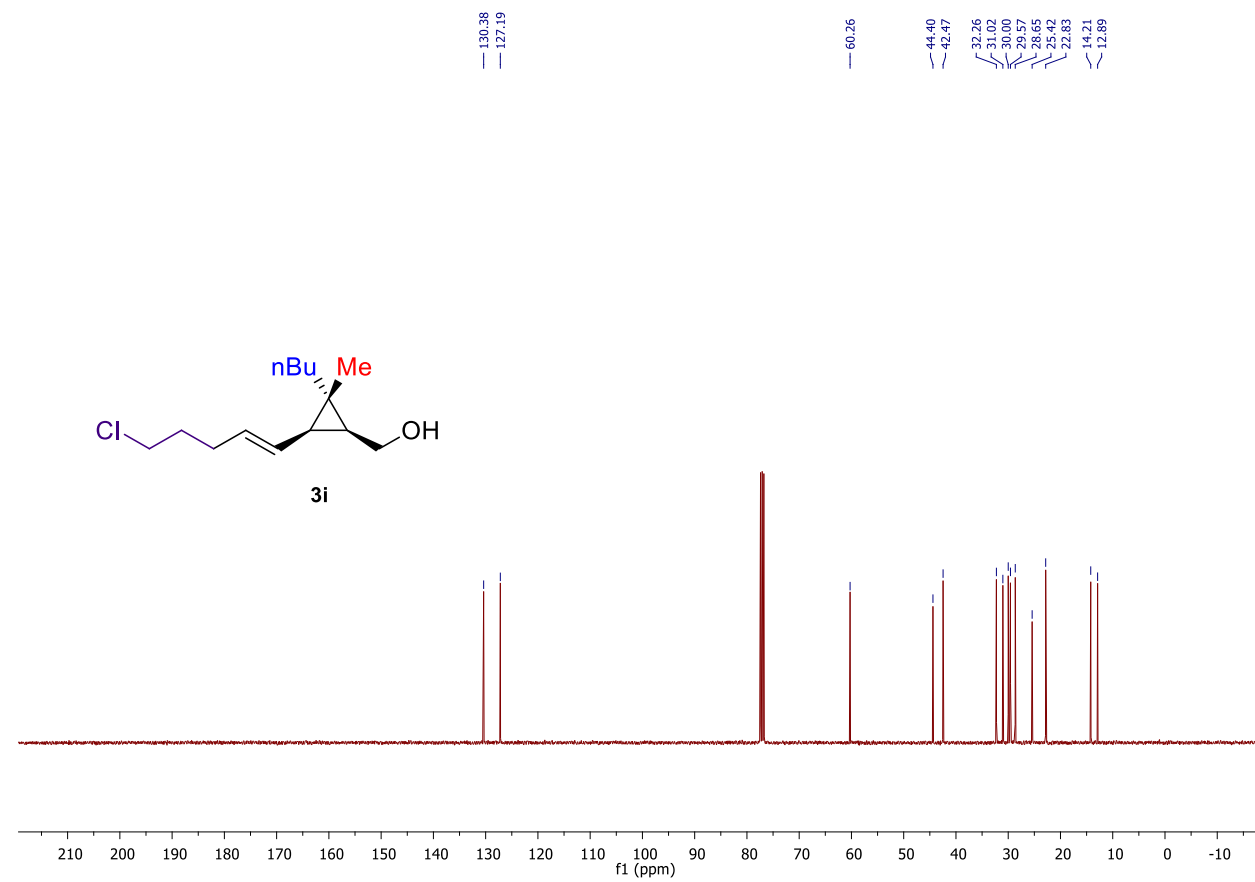

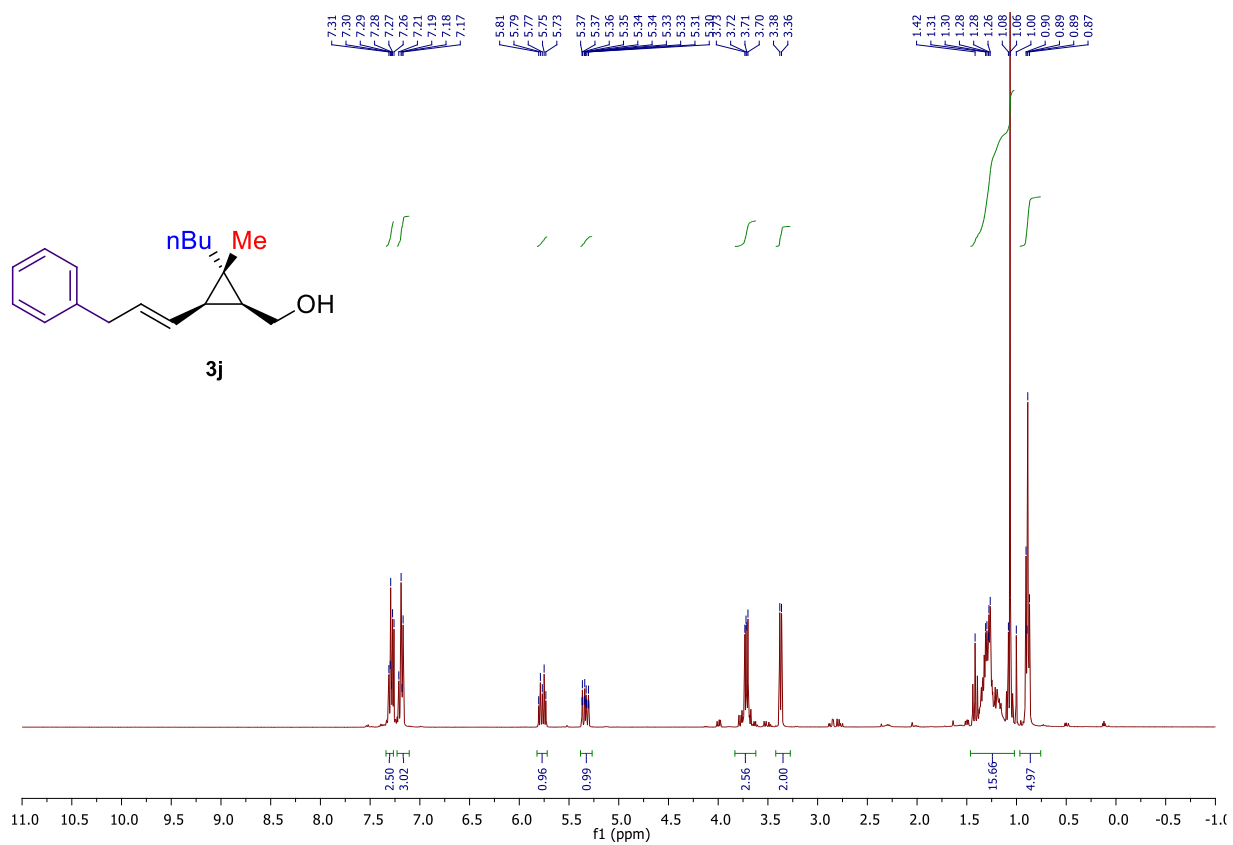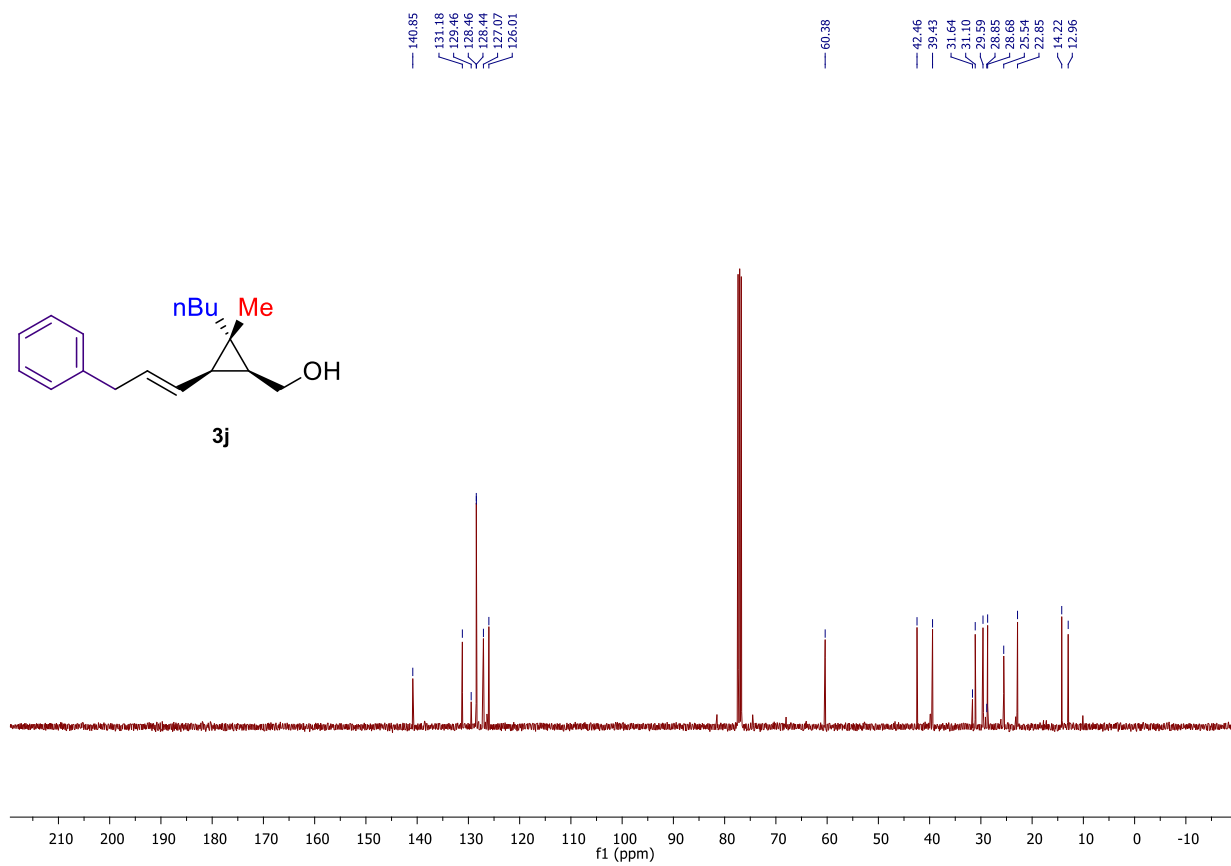

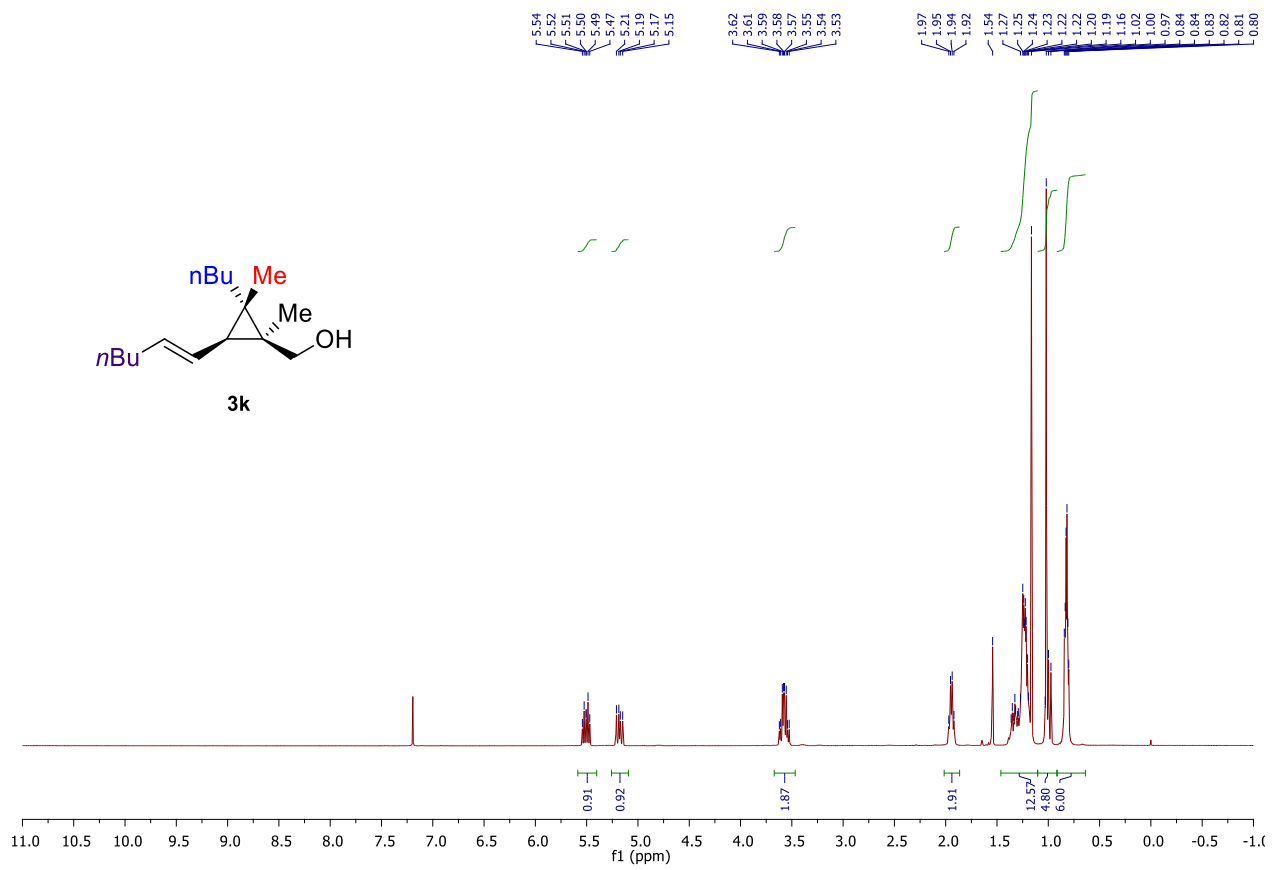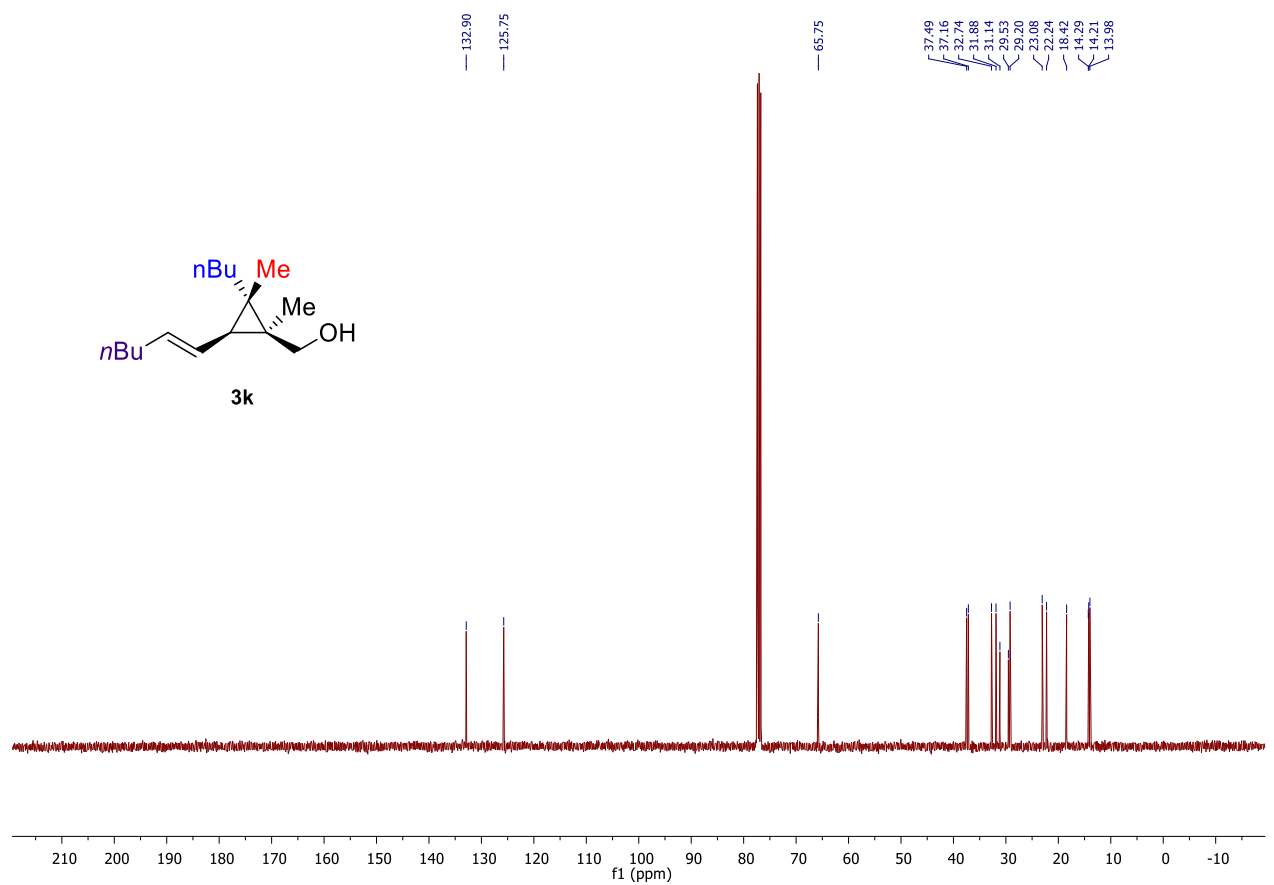

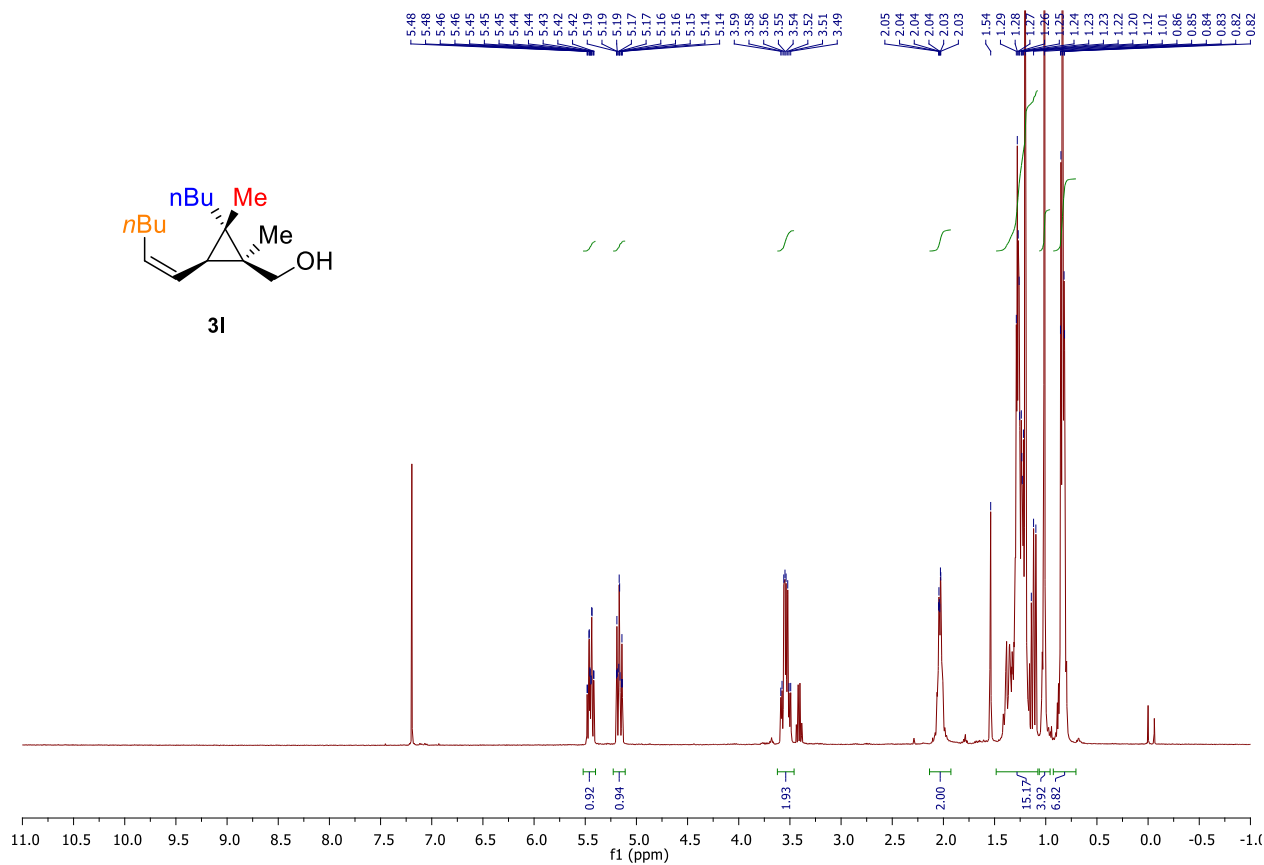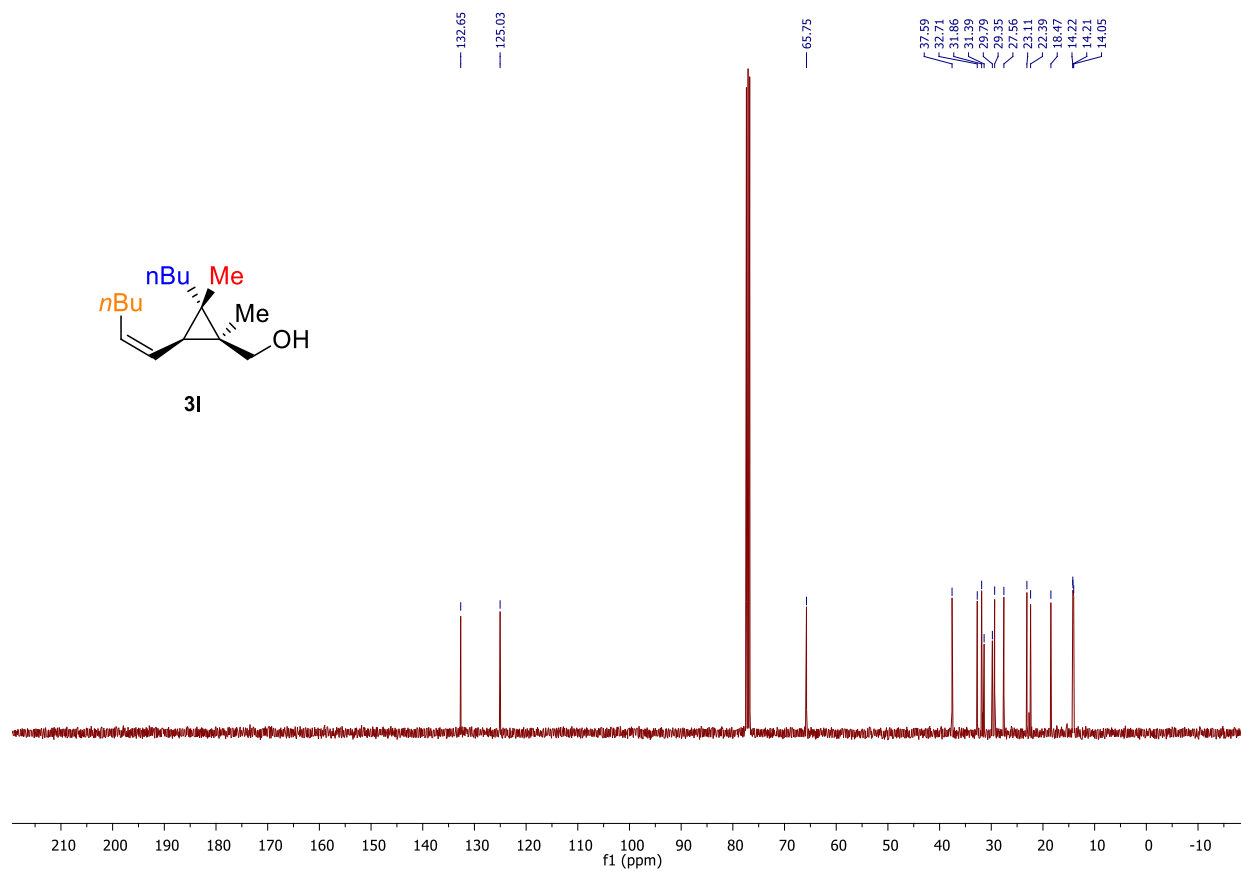

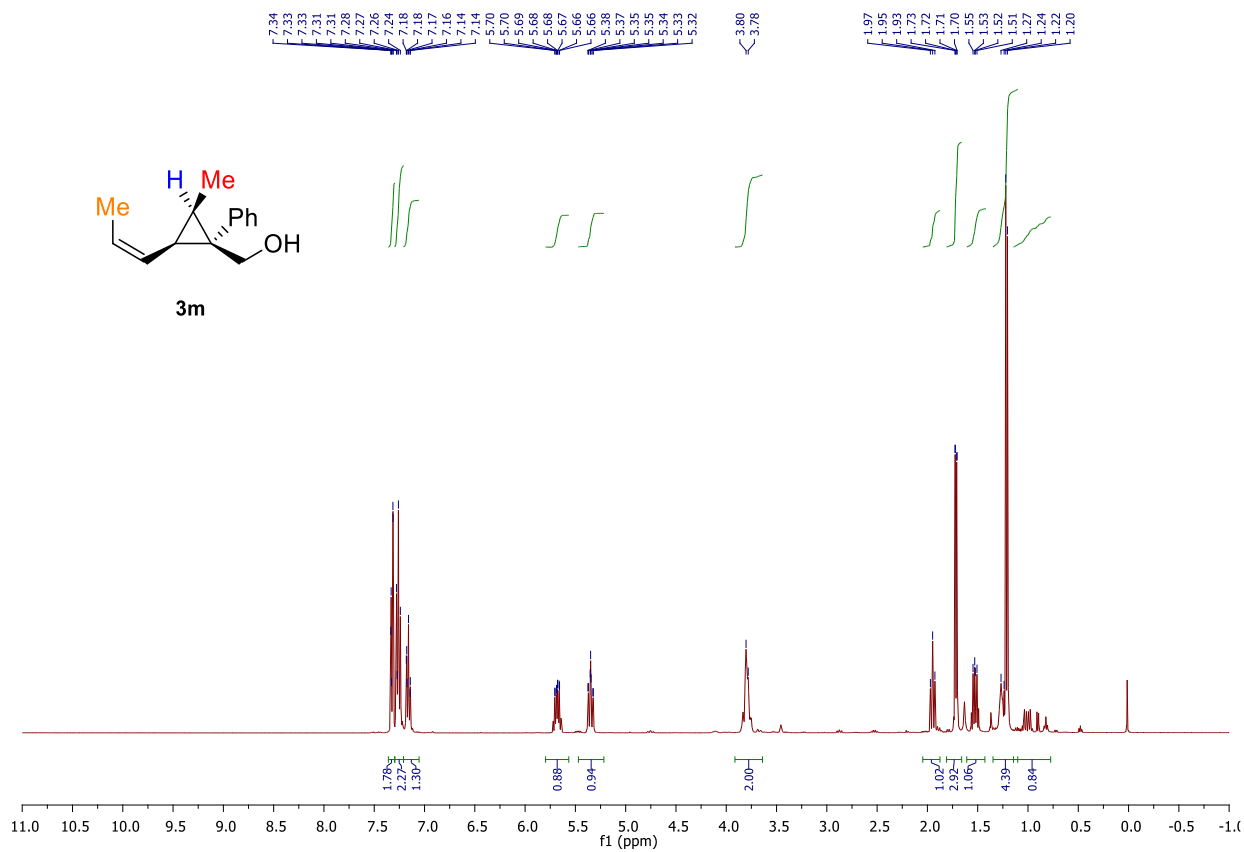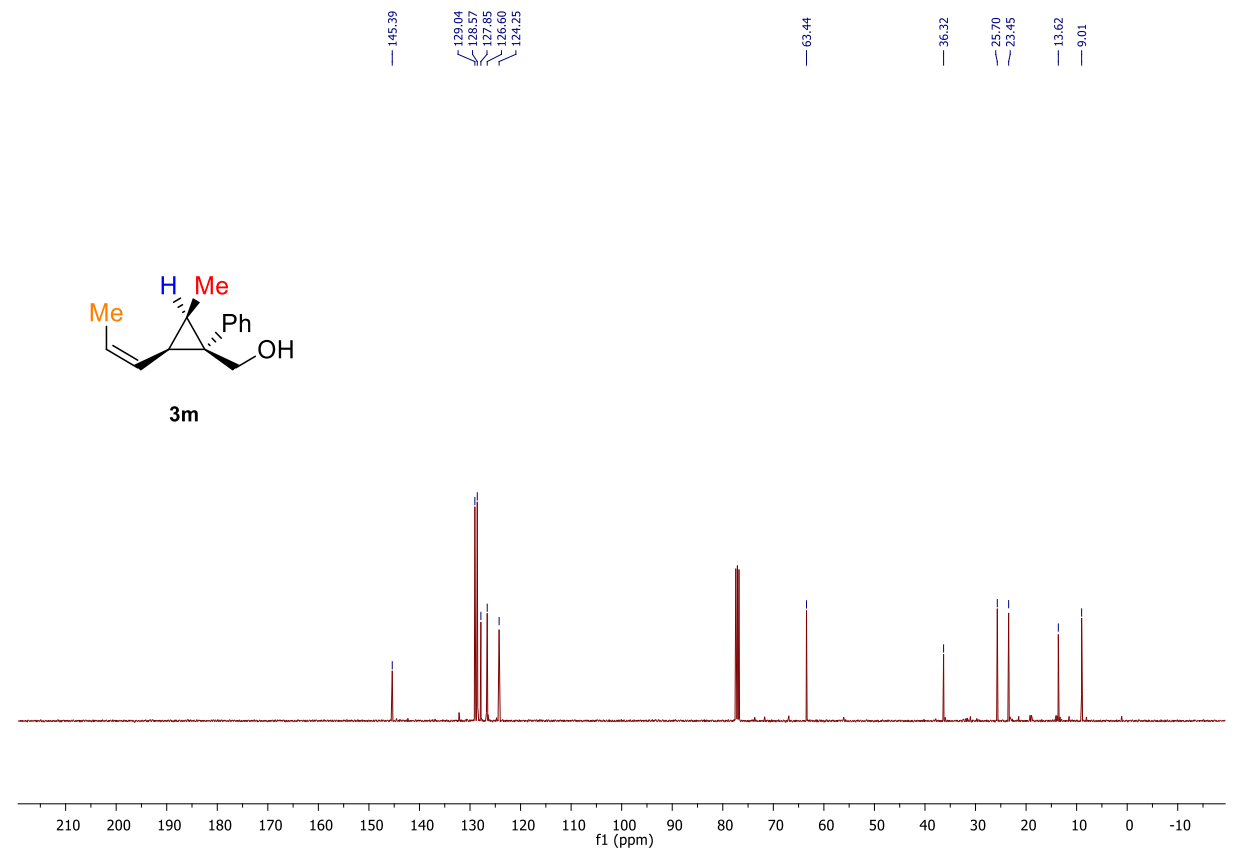

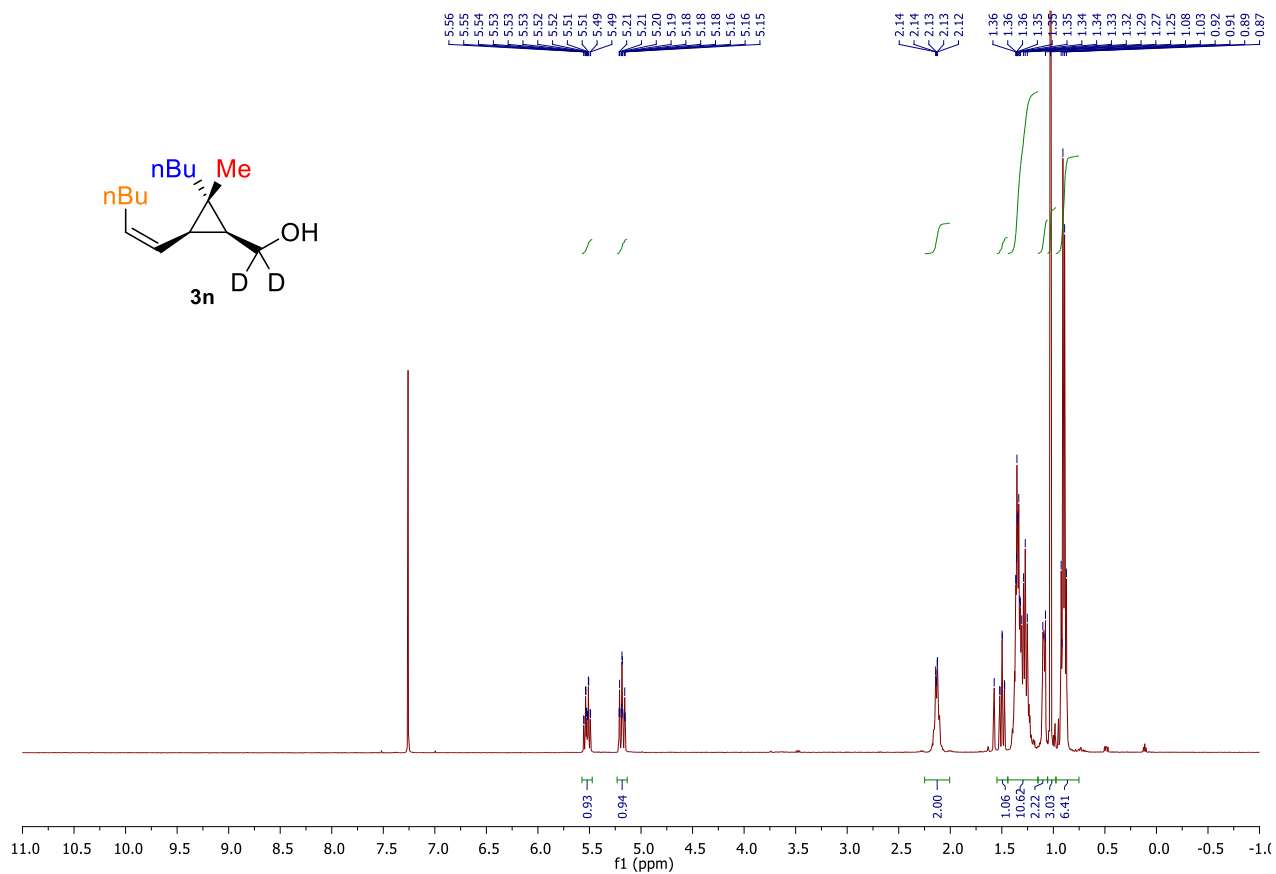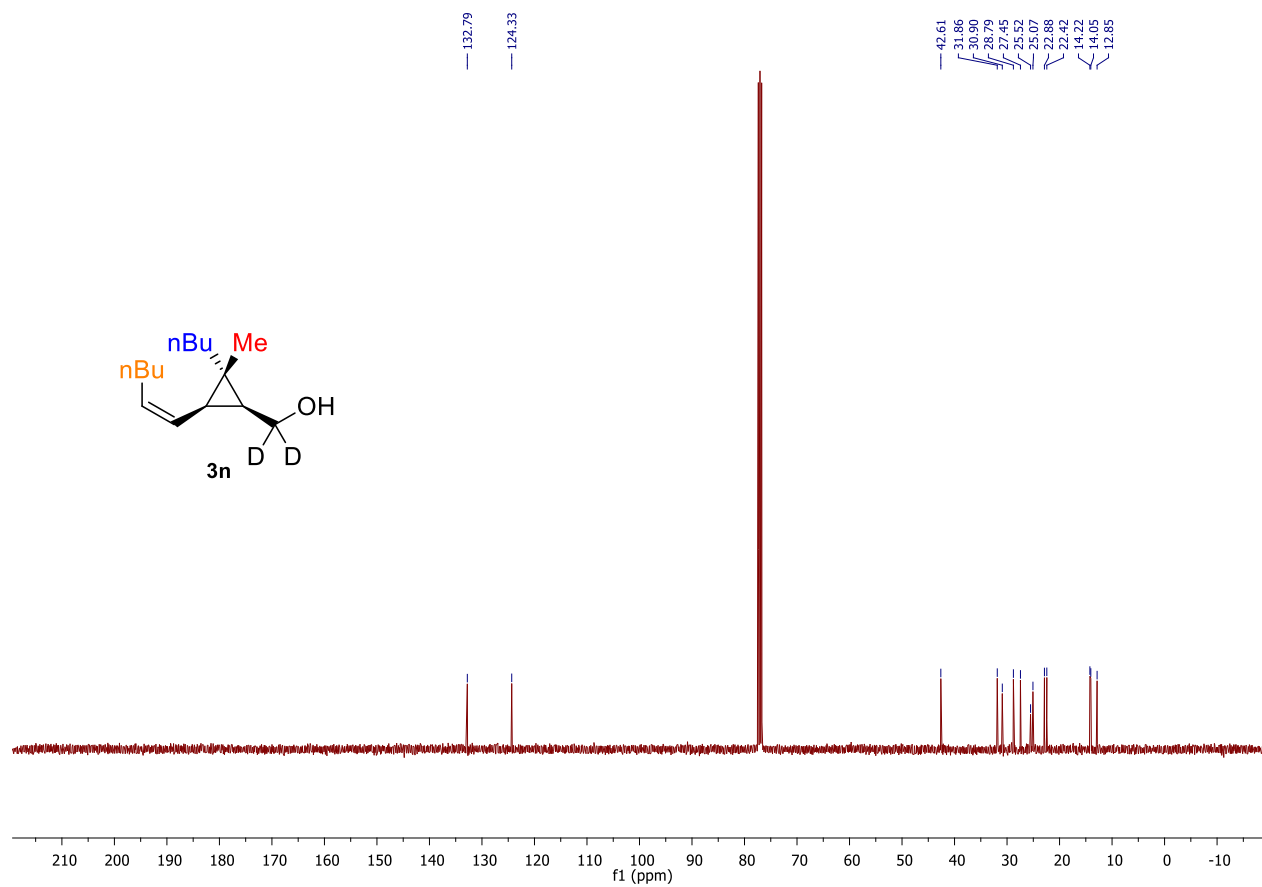

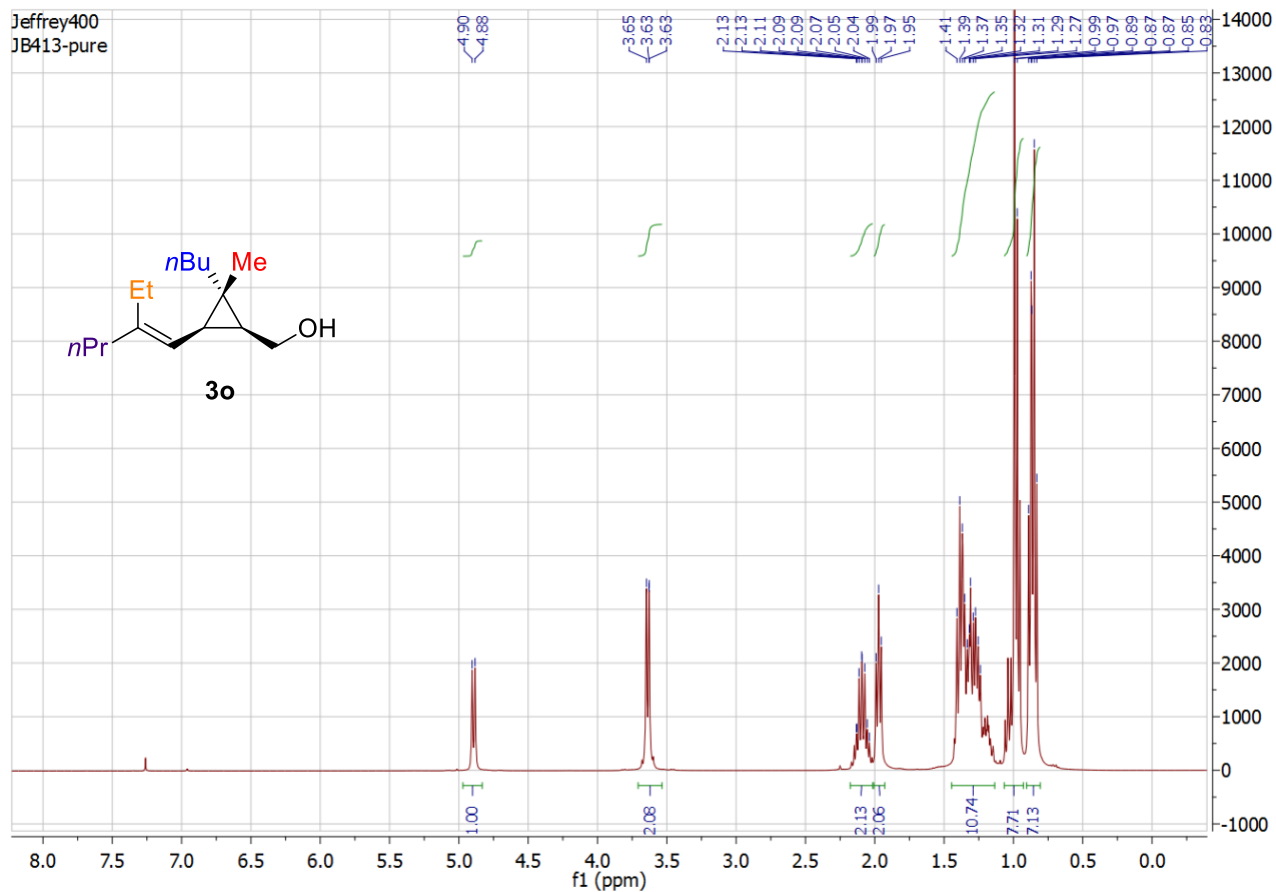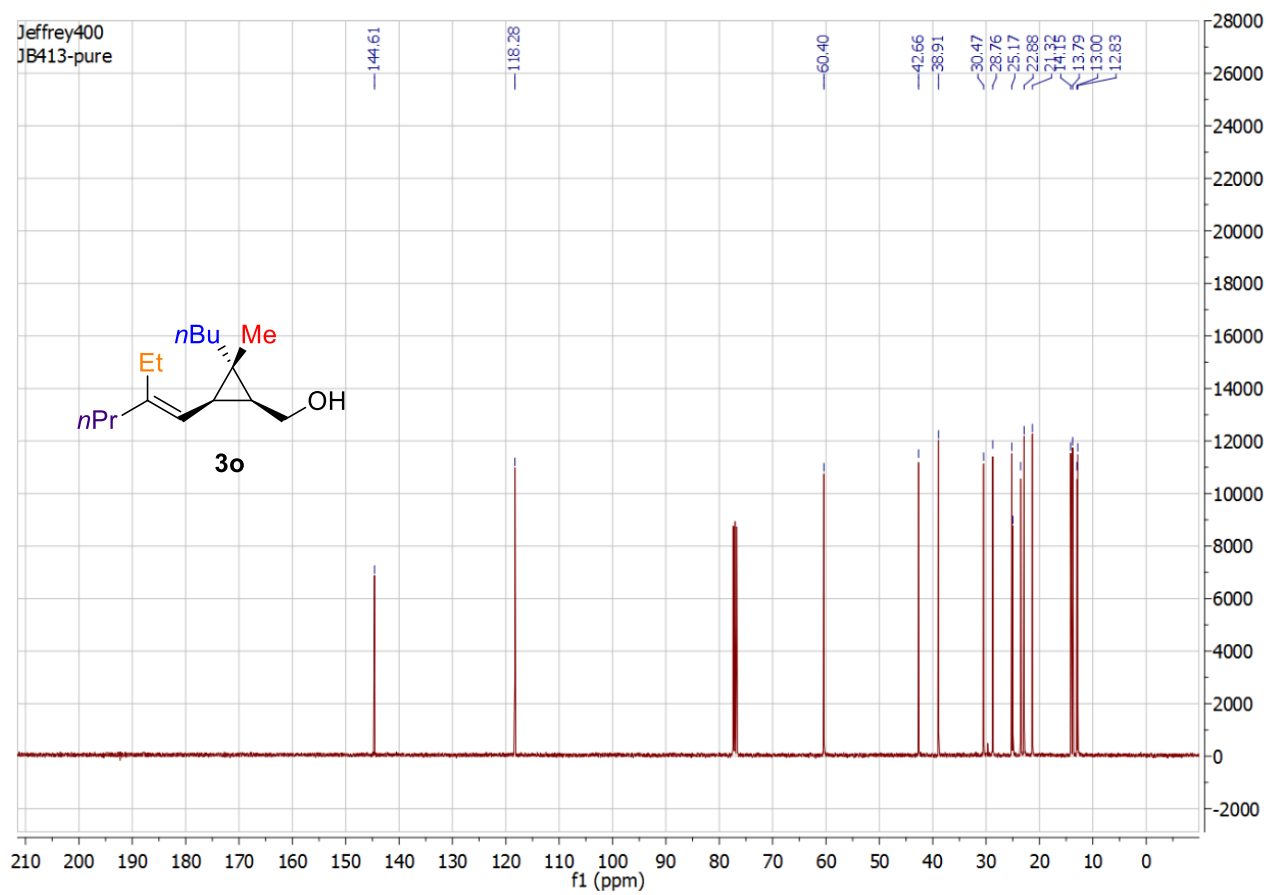



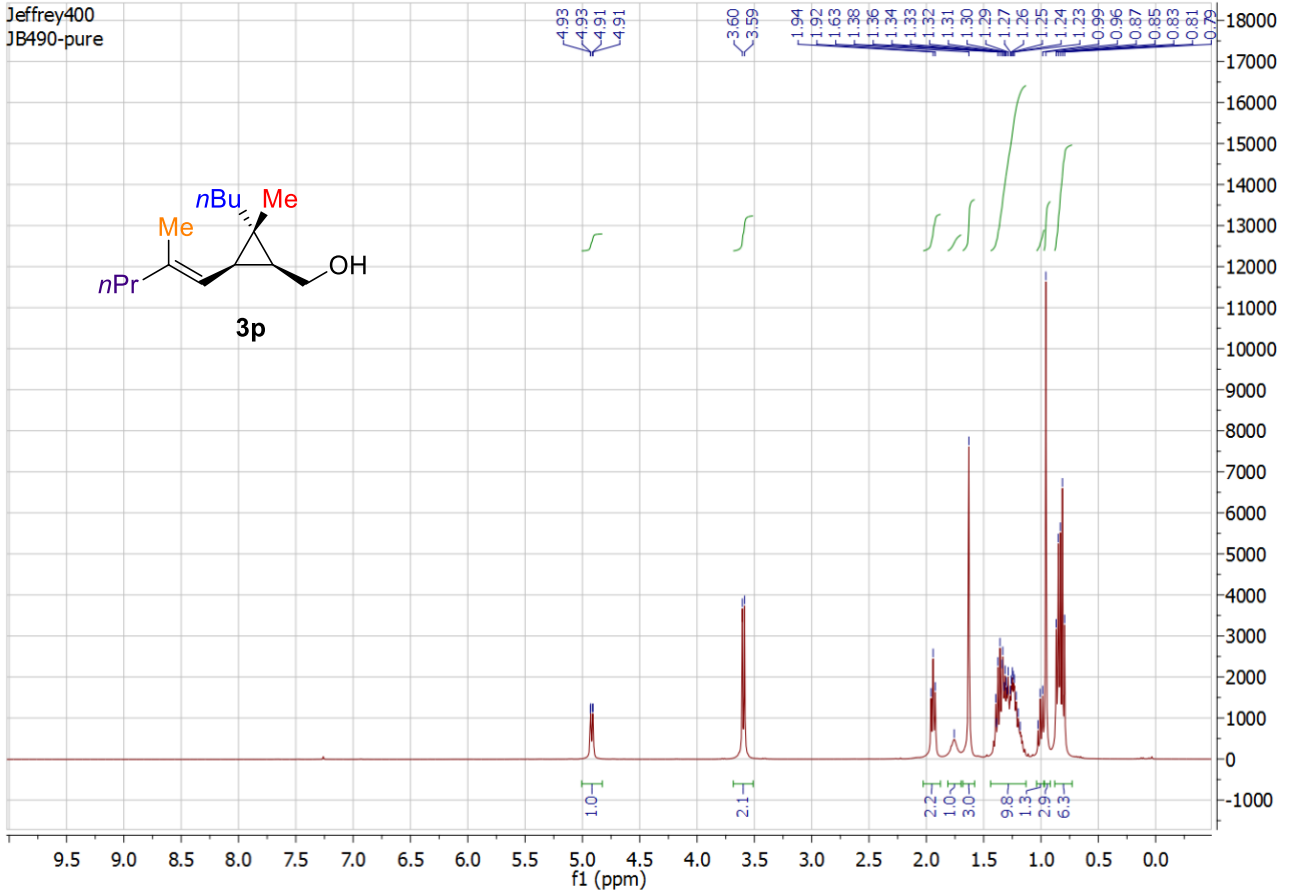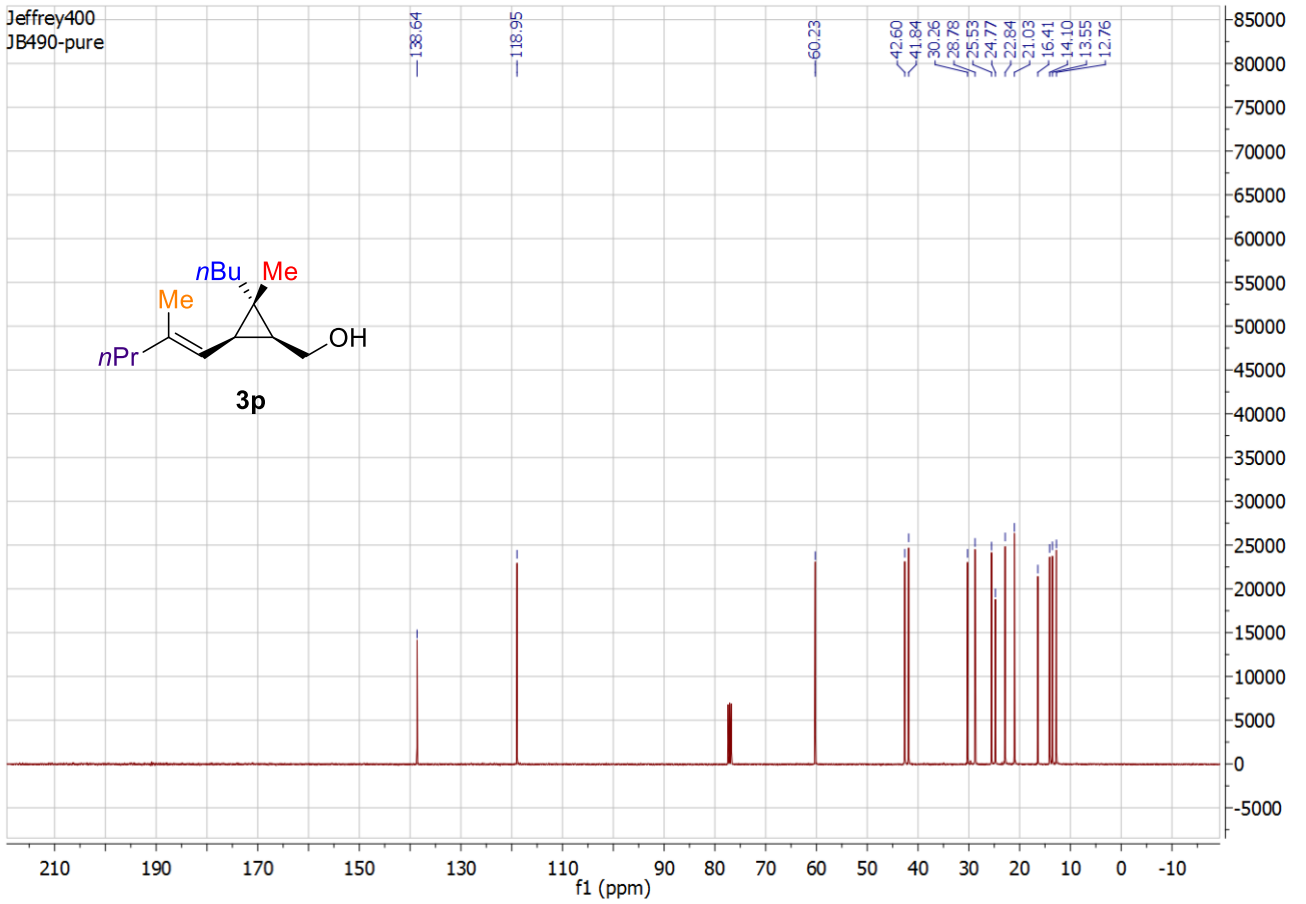

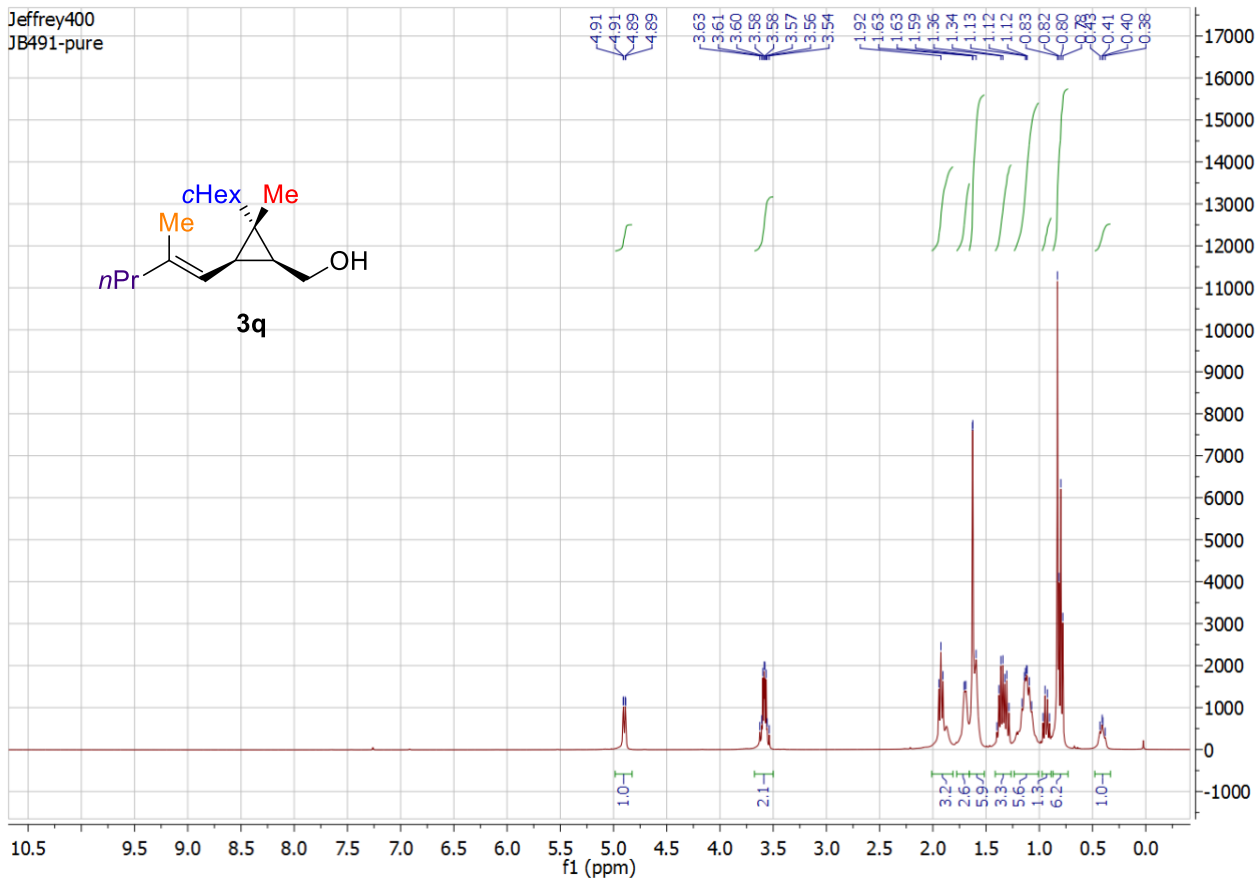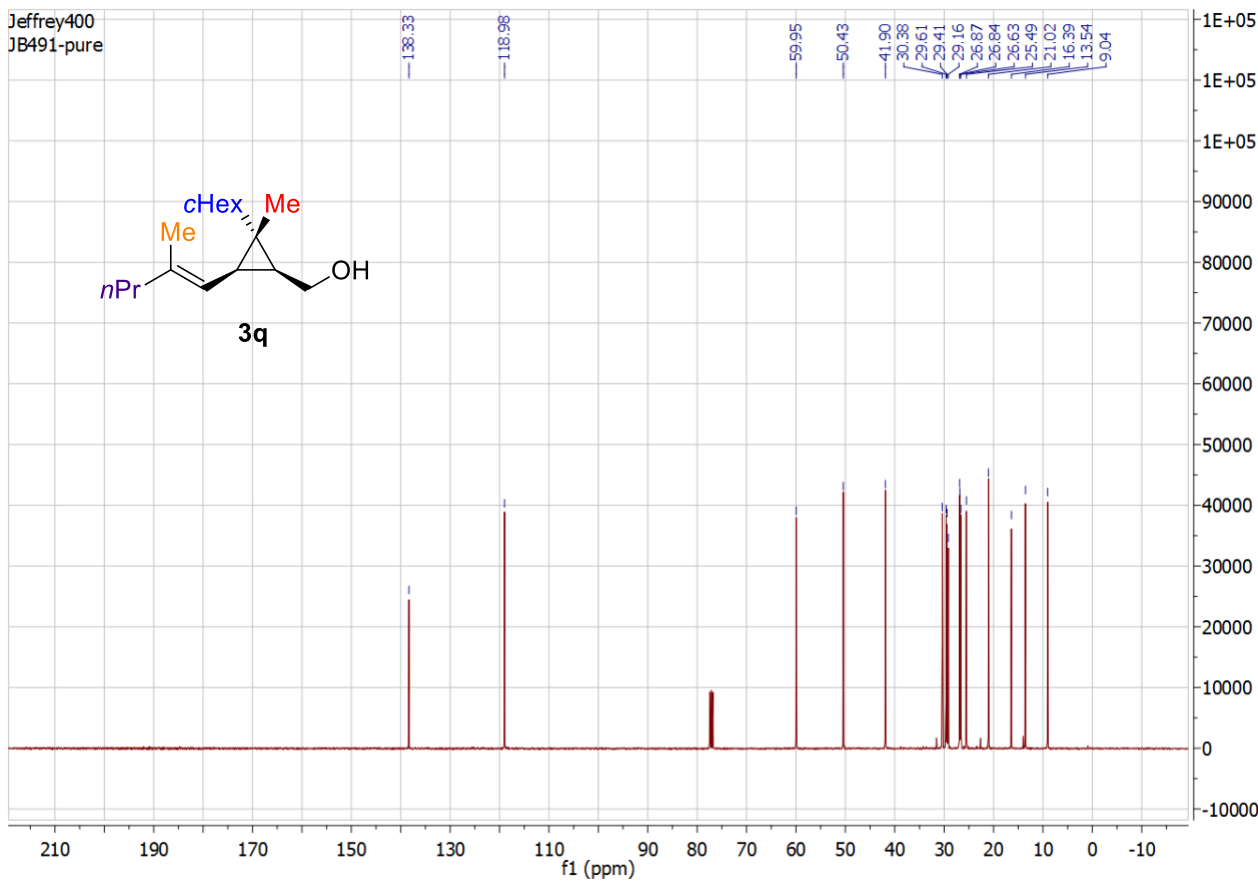

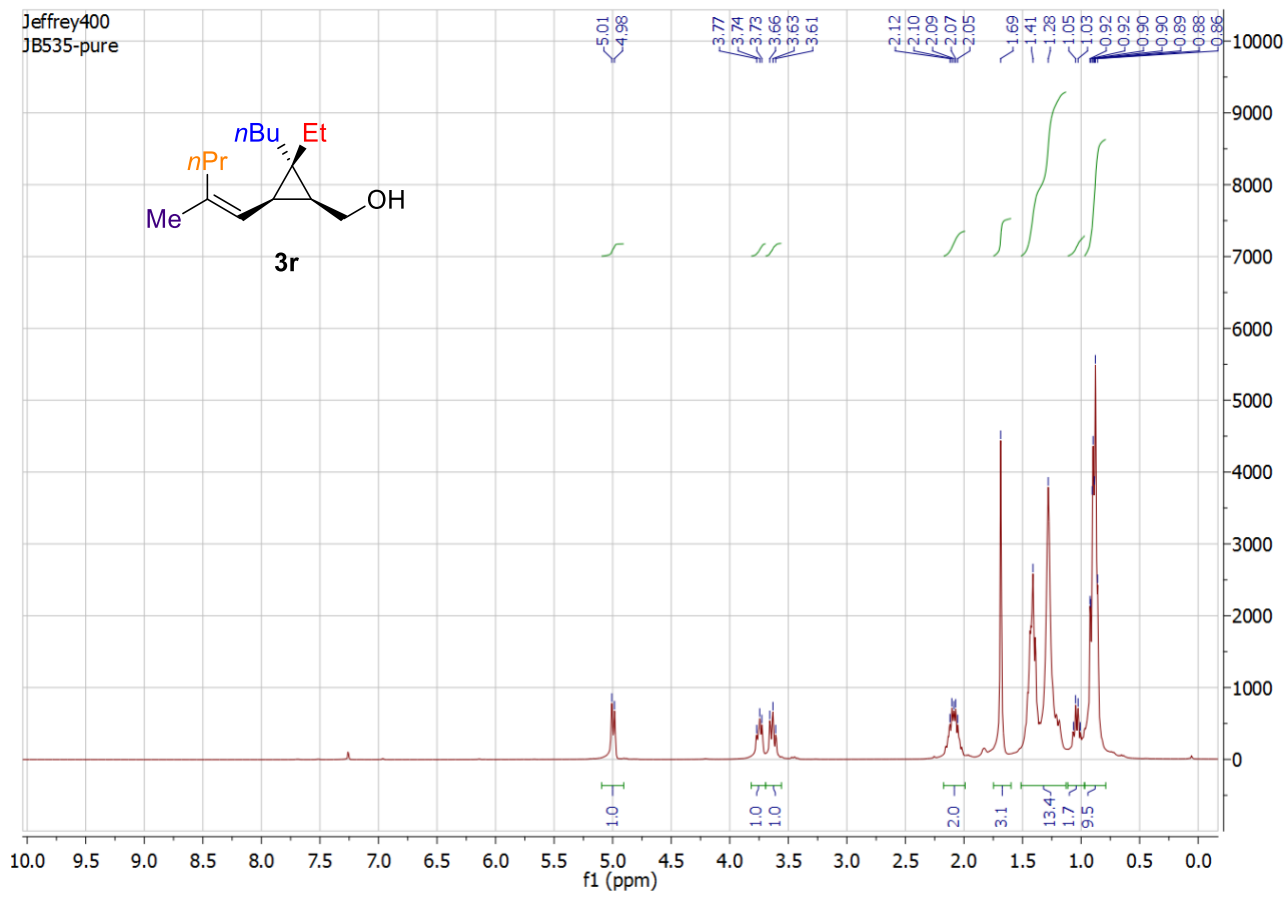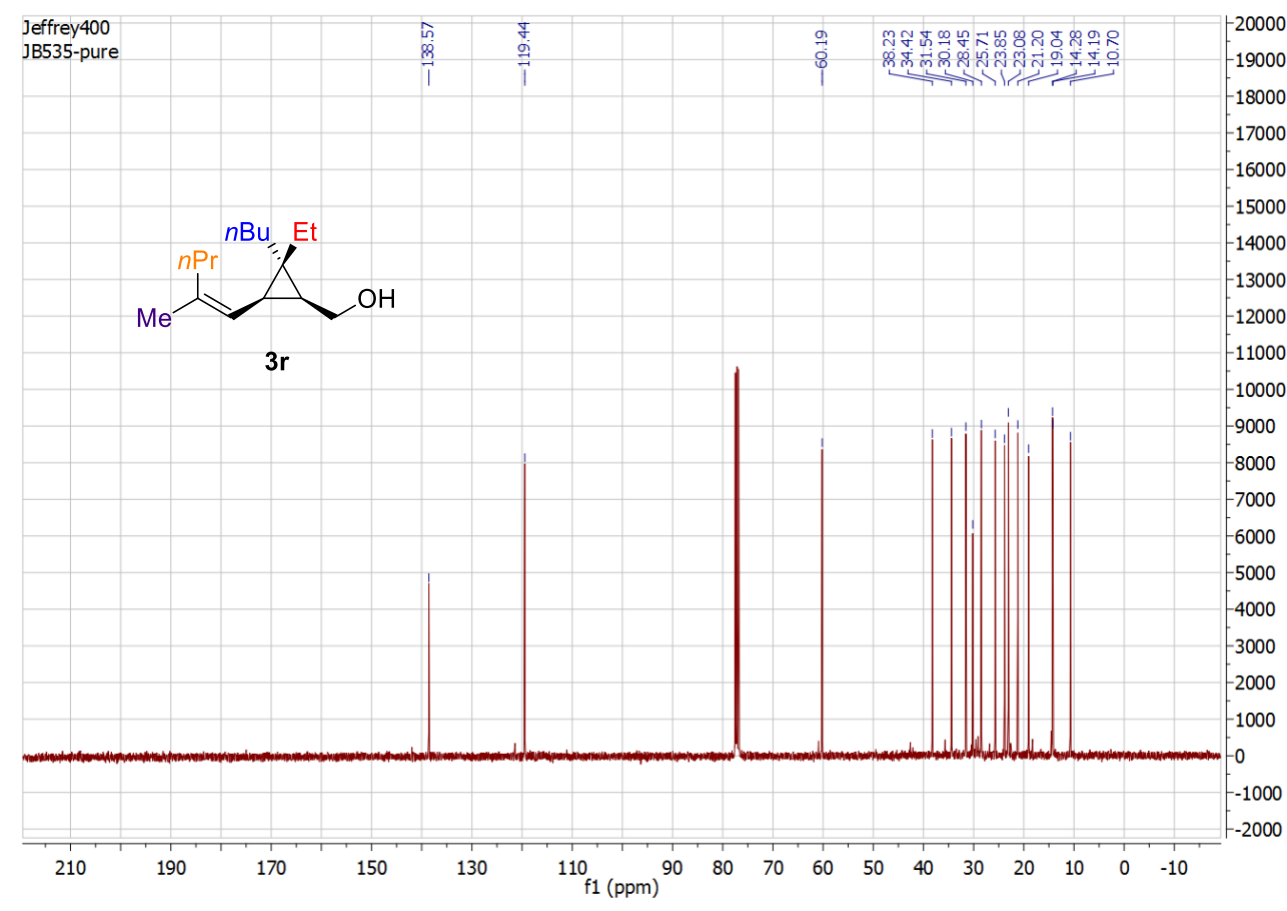

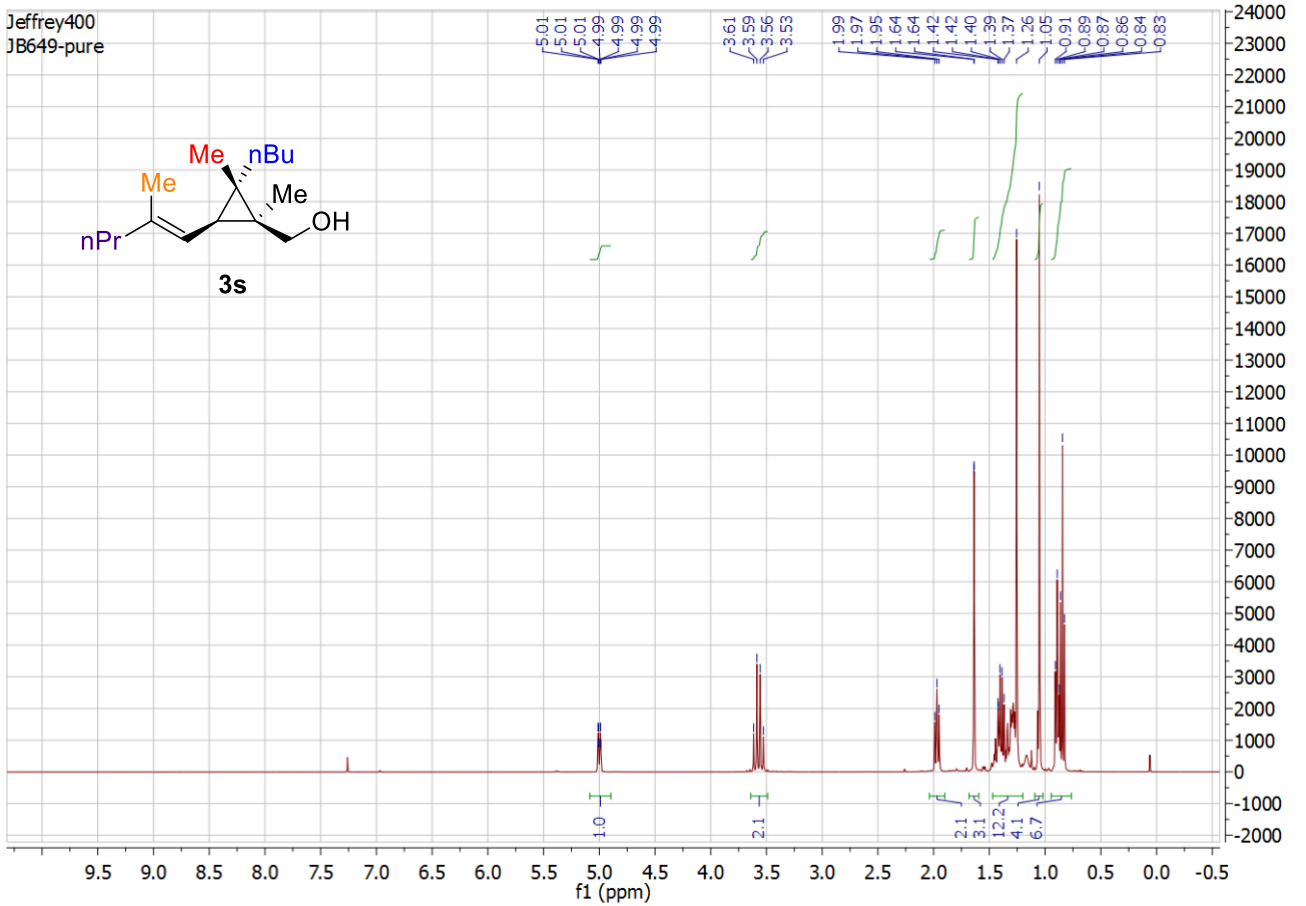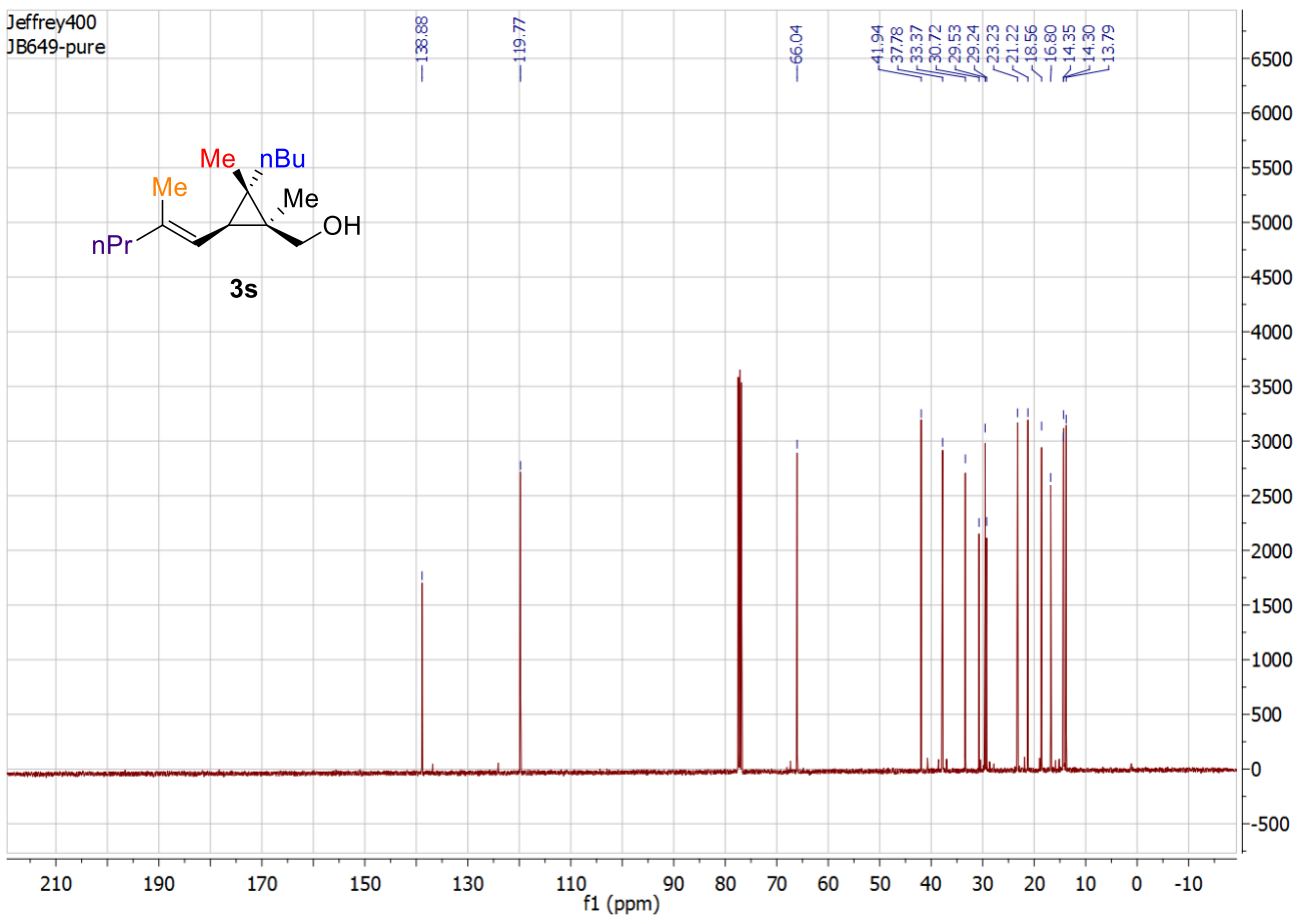

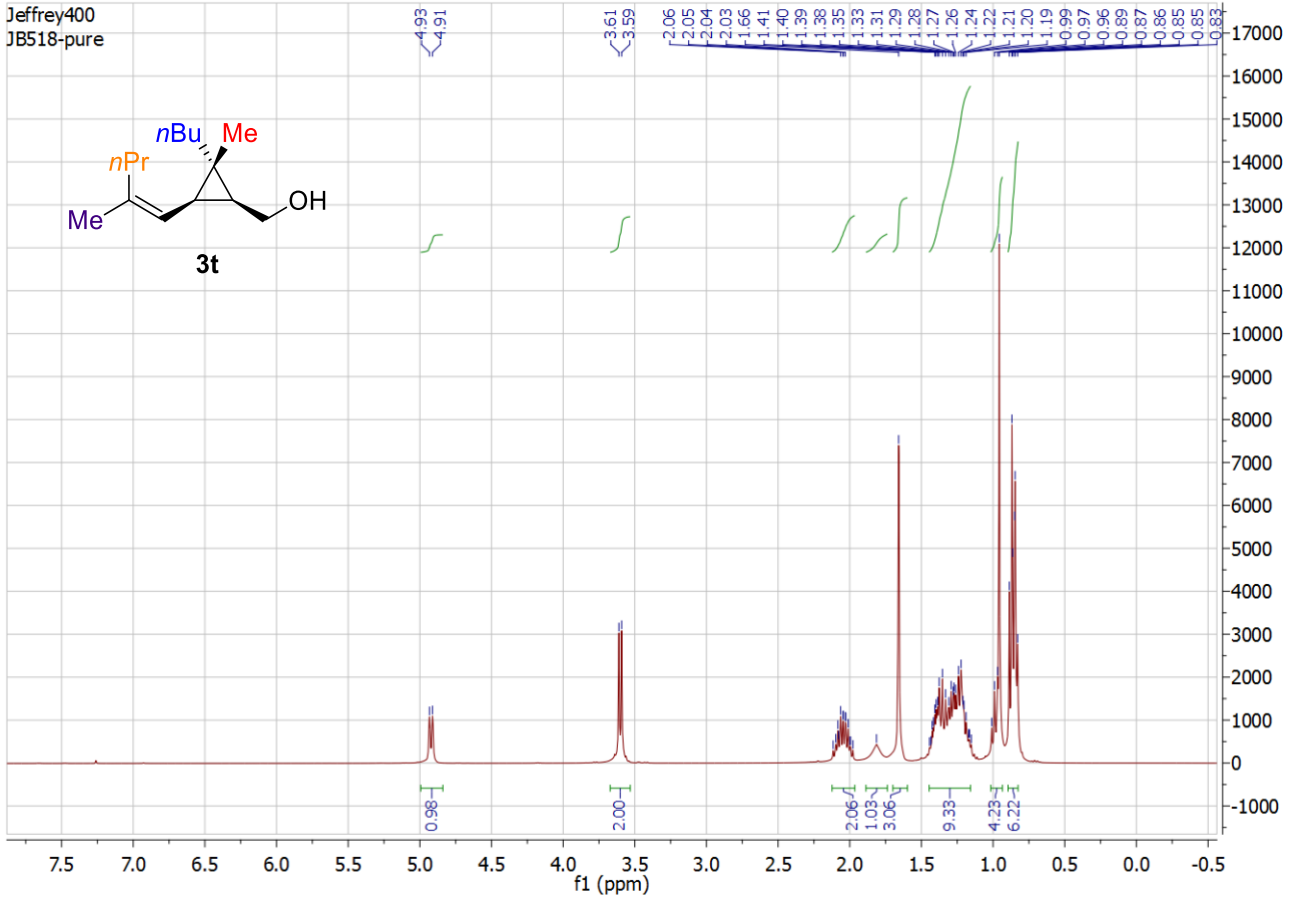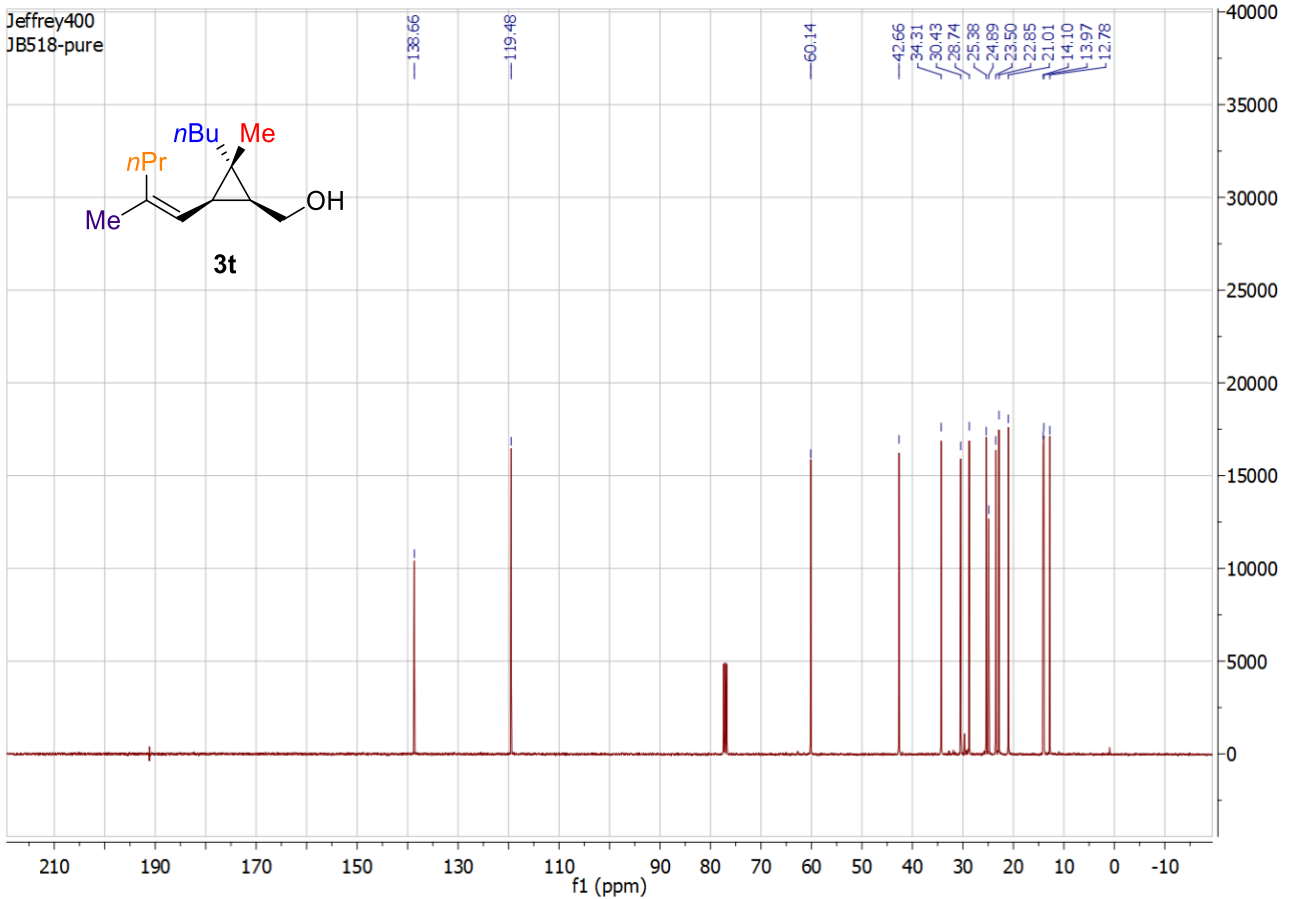

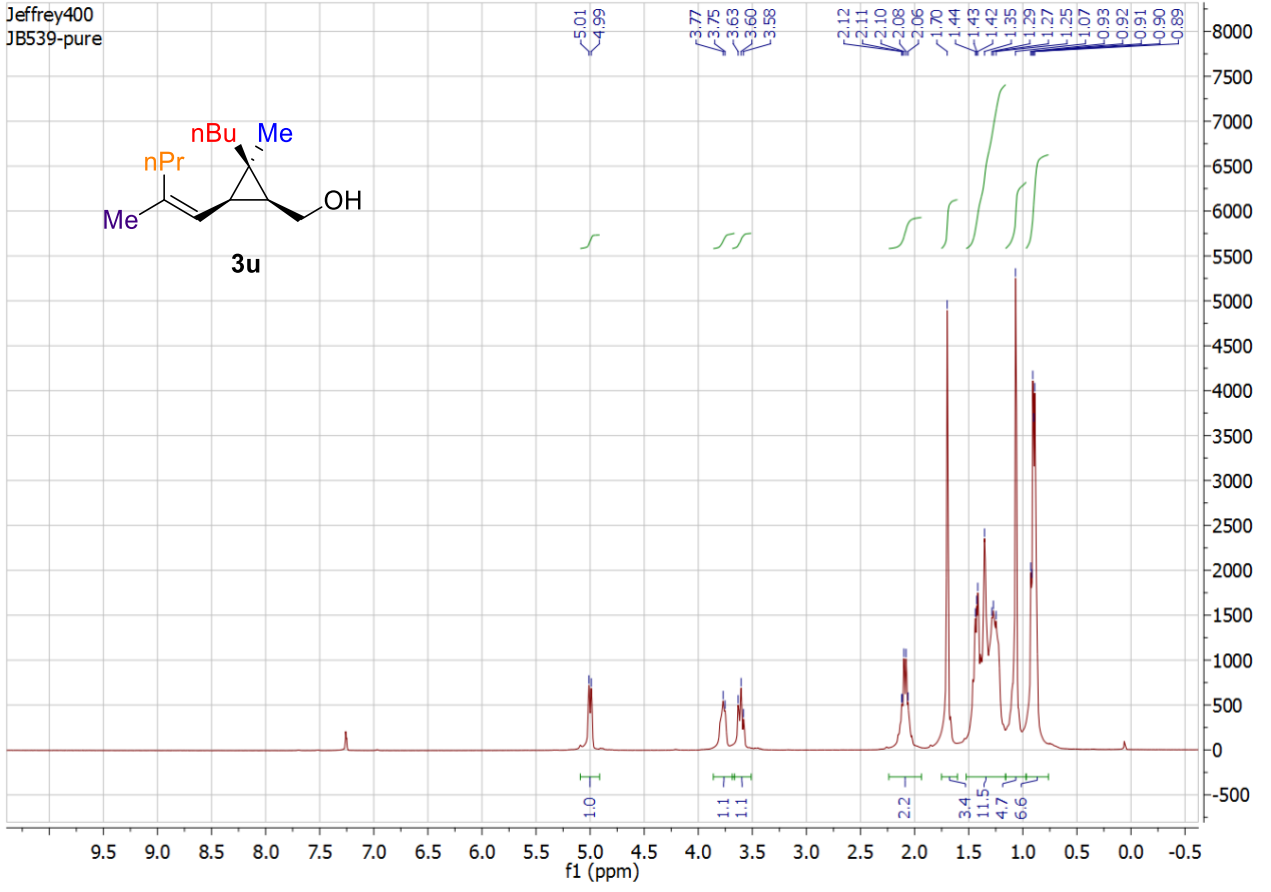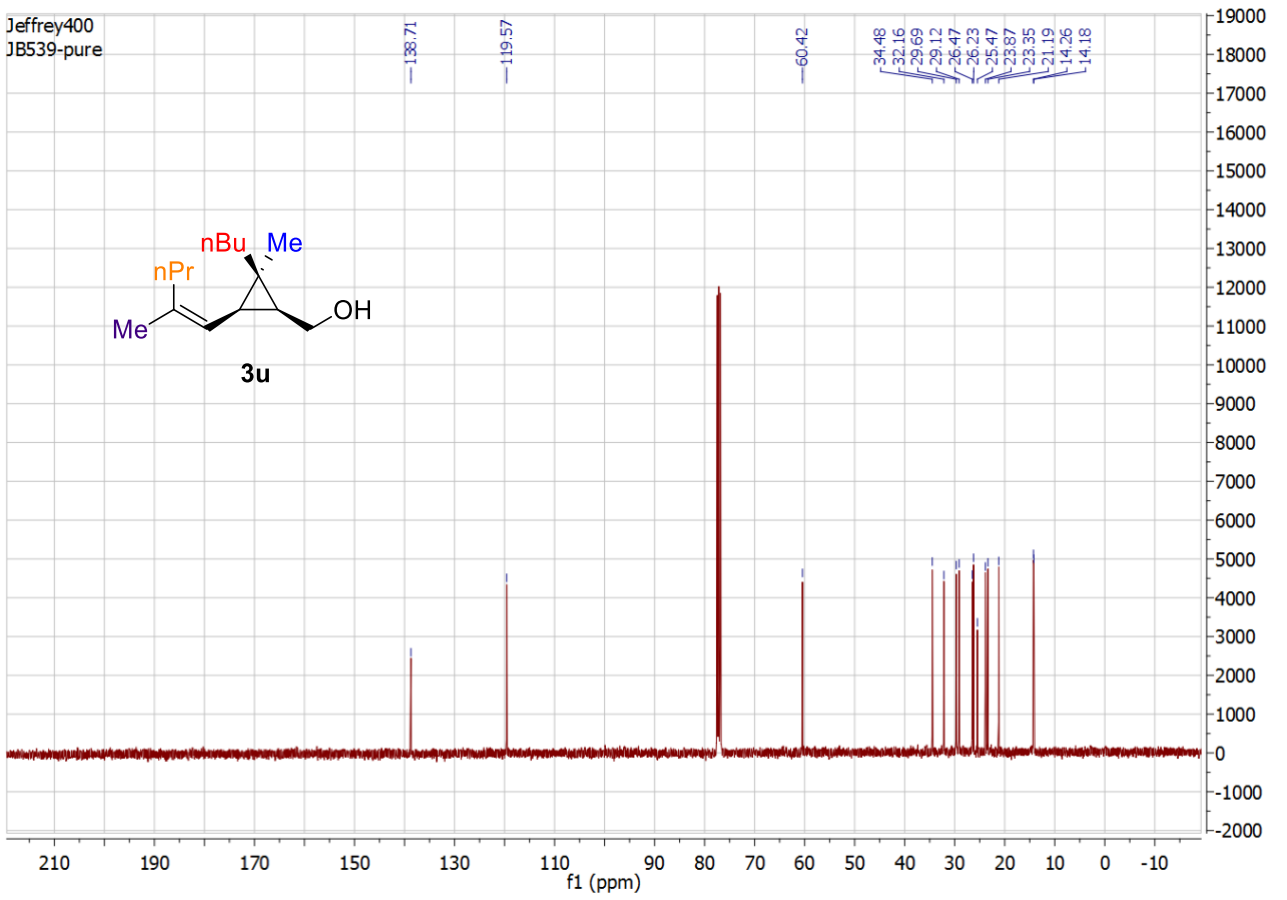

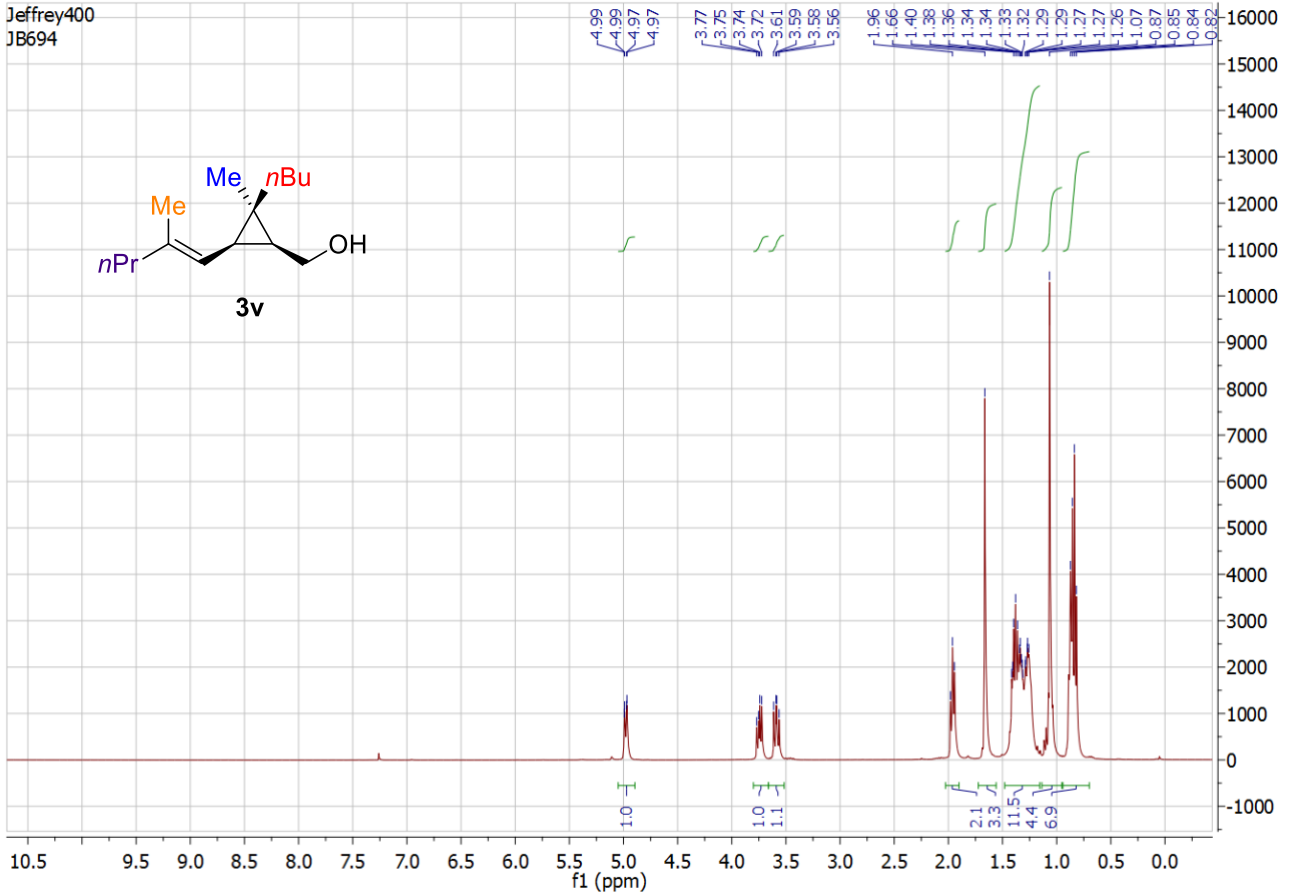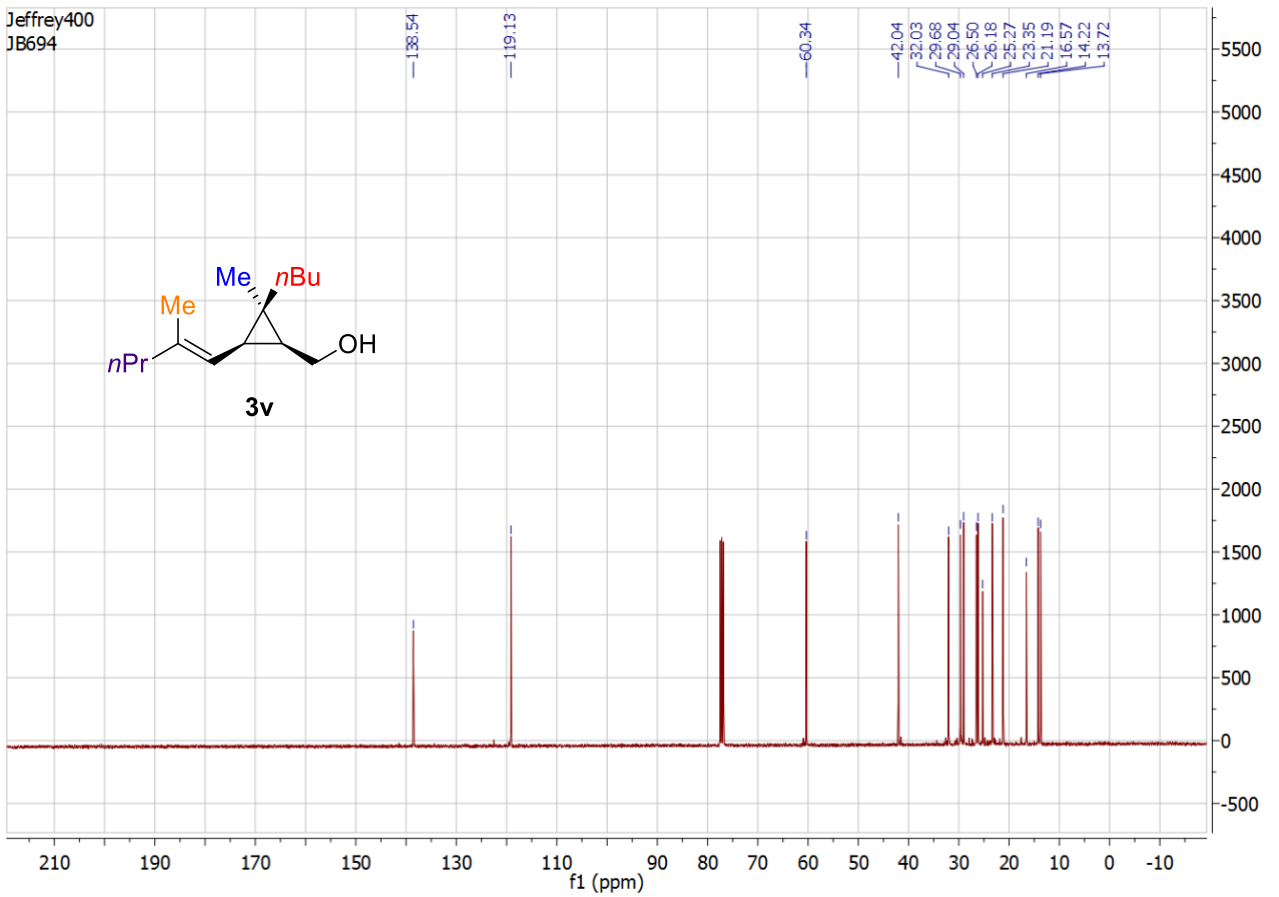

# NMR spectras of aldehydes 4a-4ar

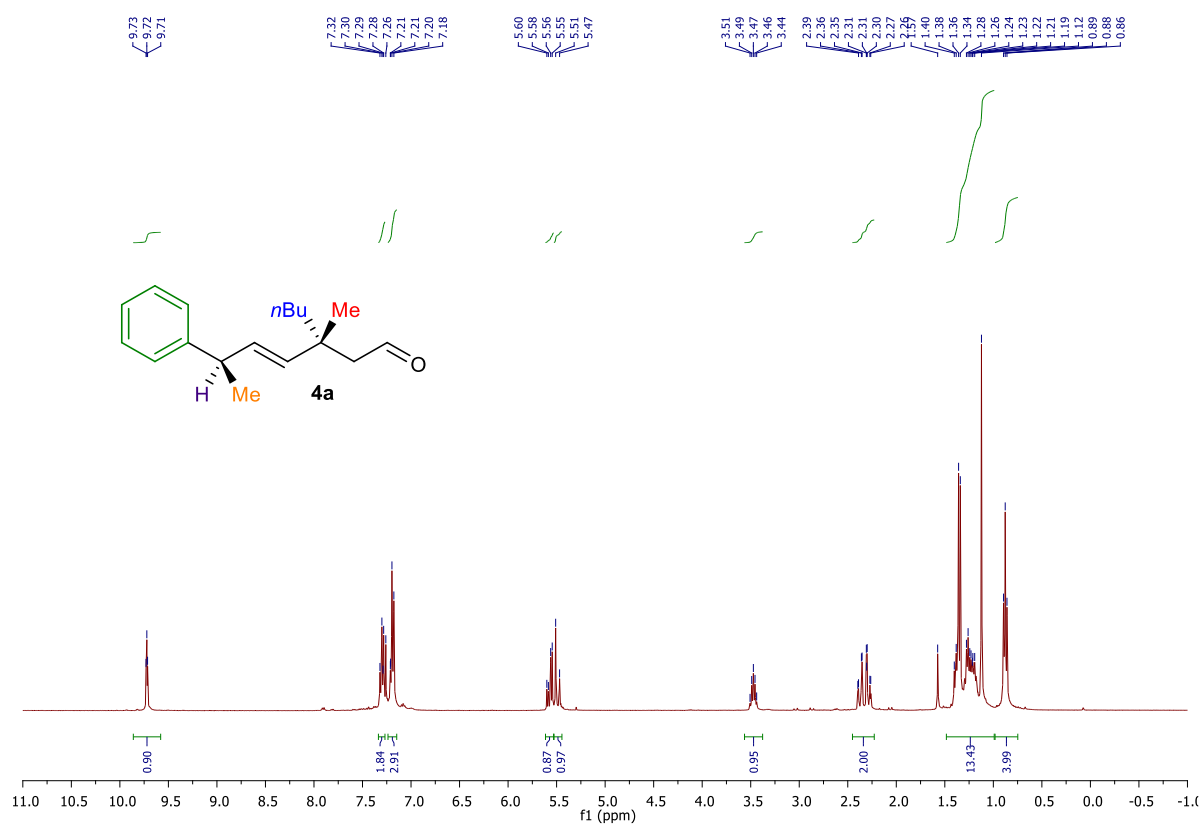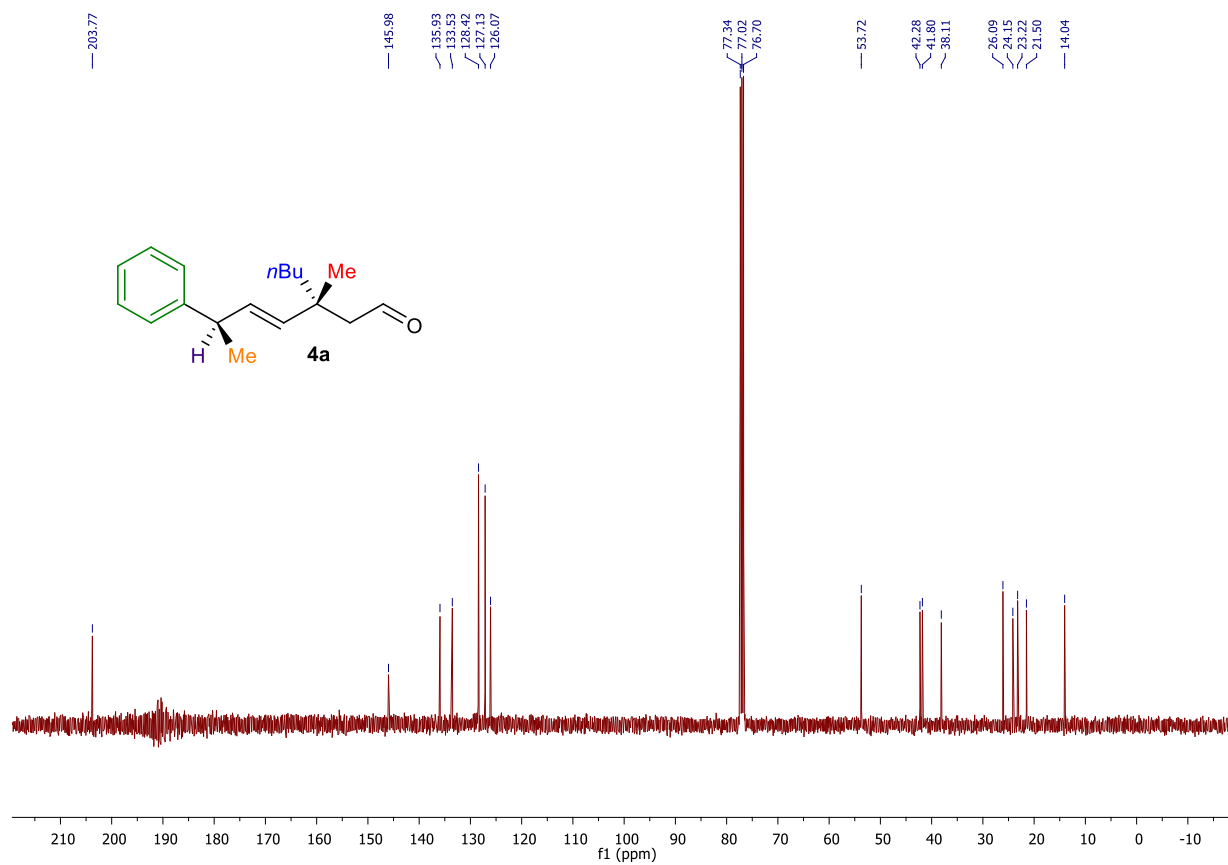



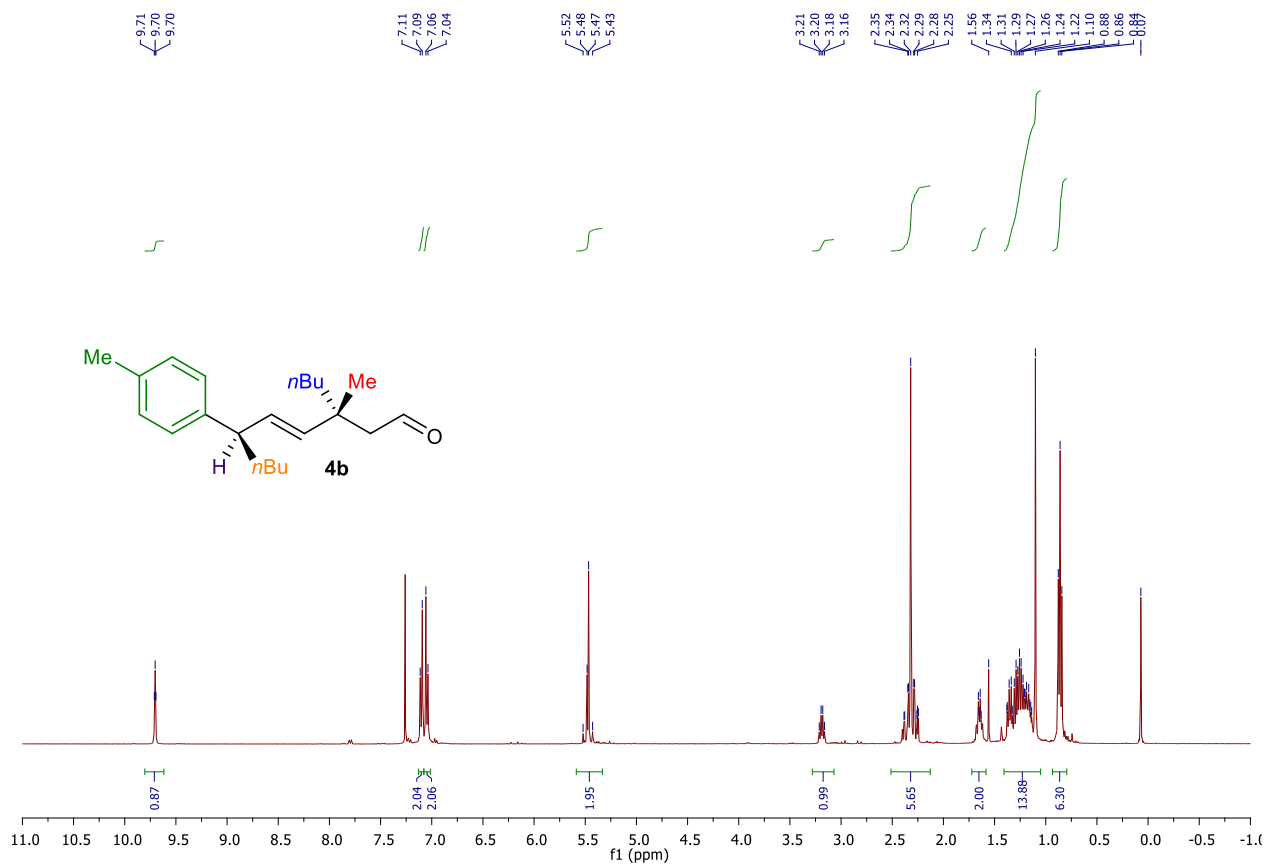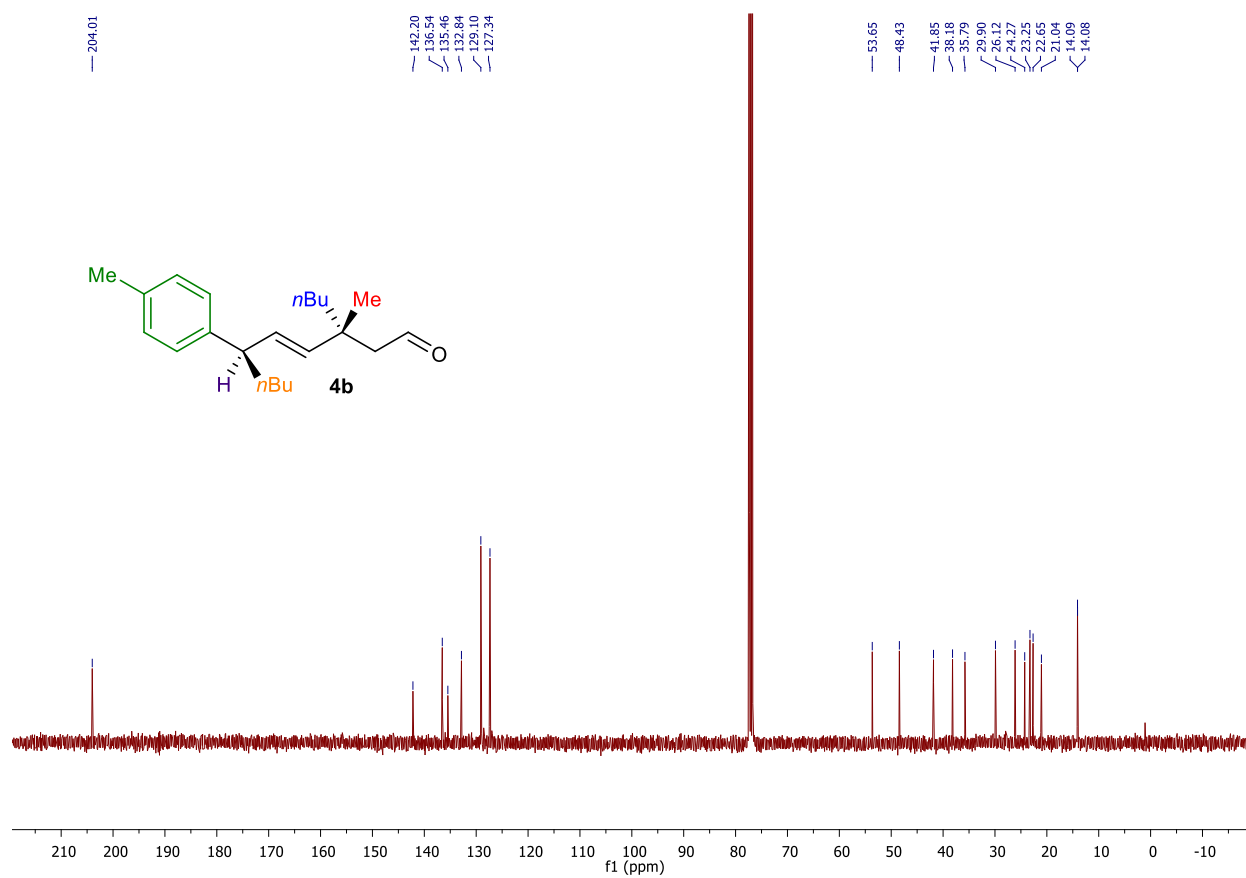

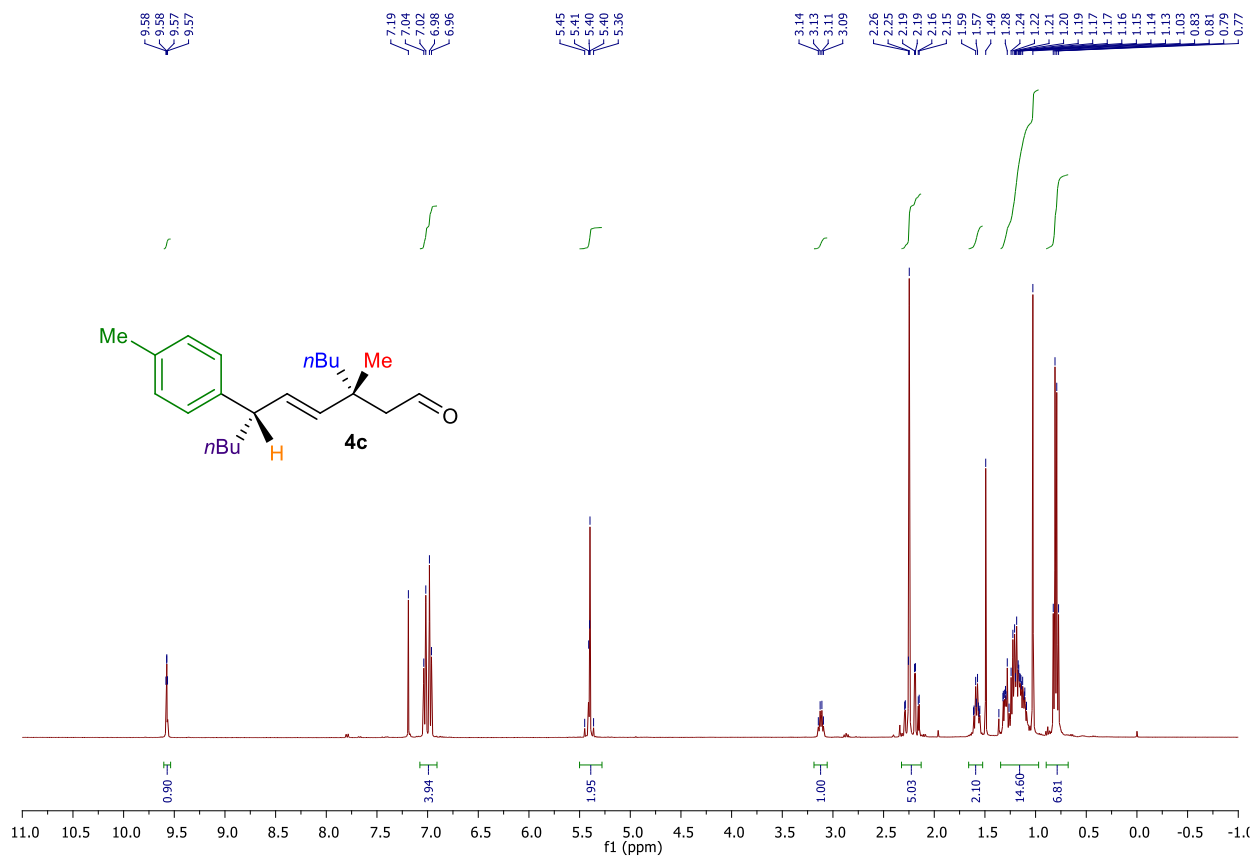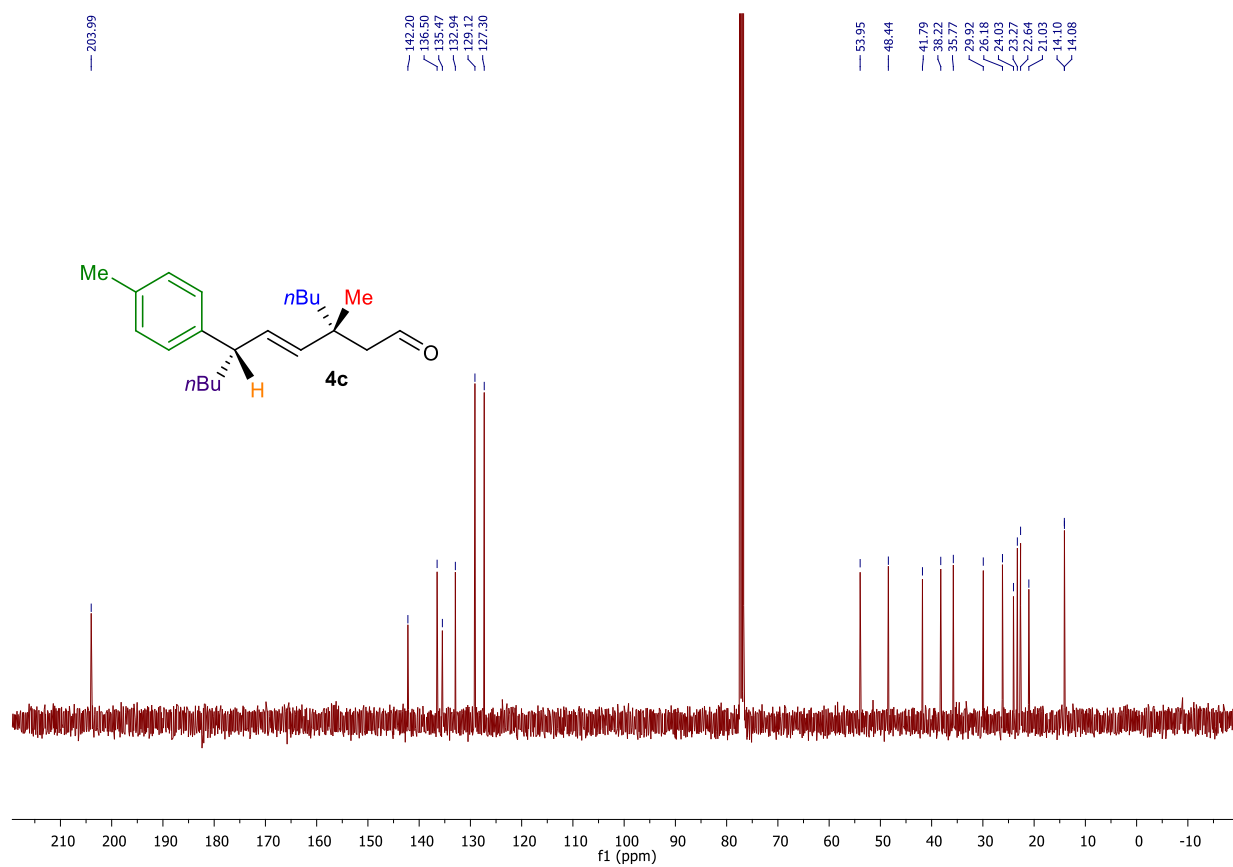

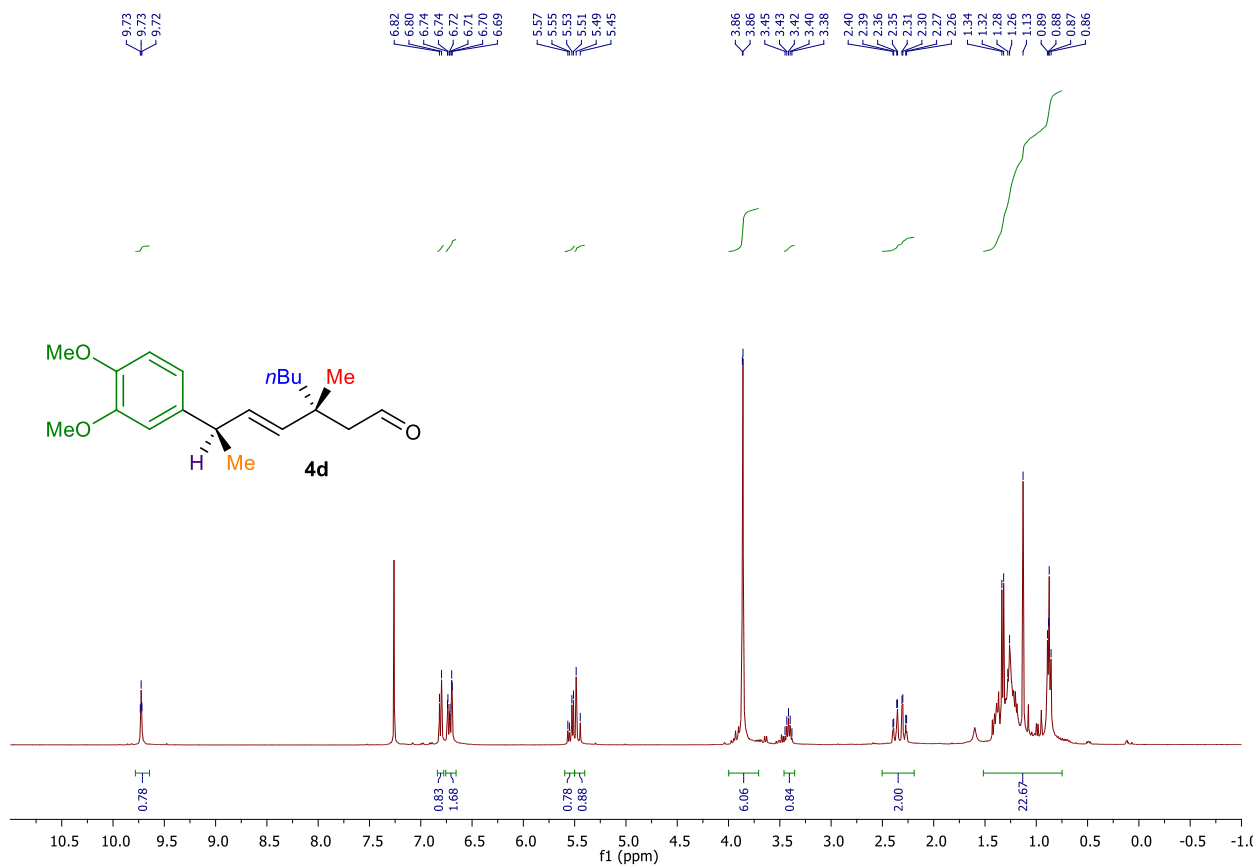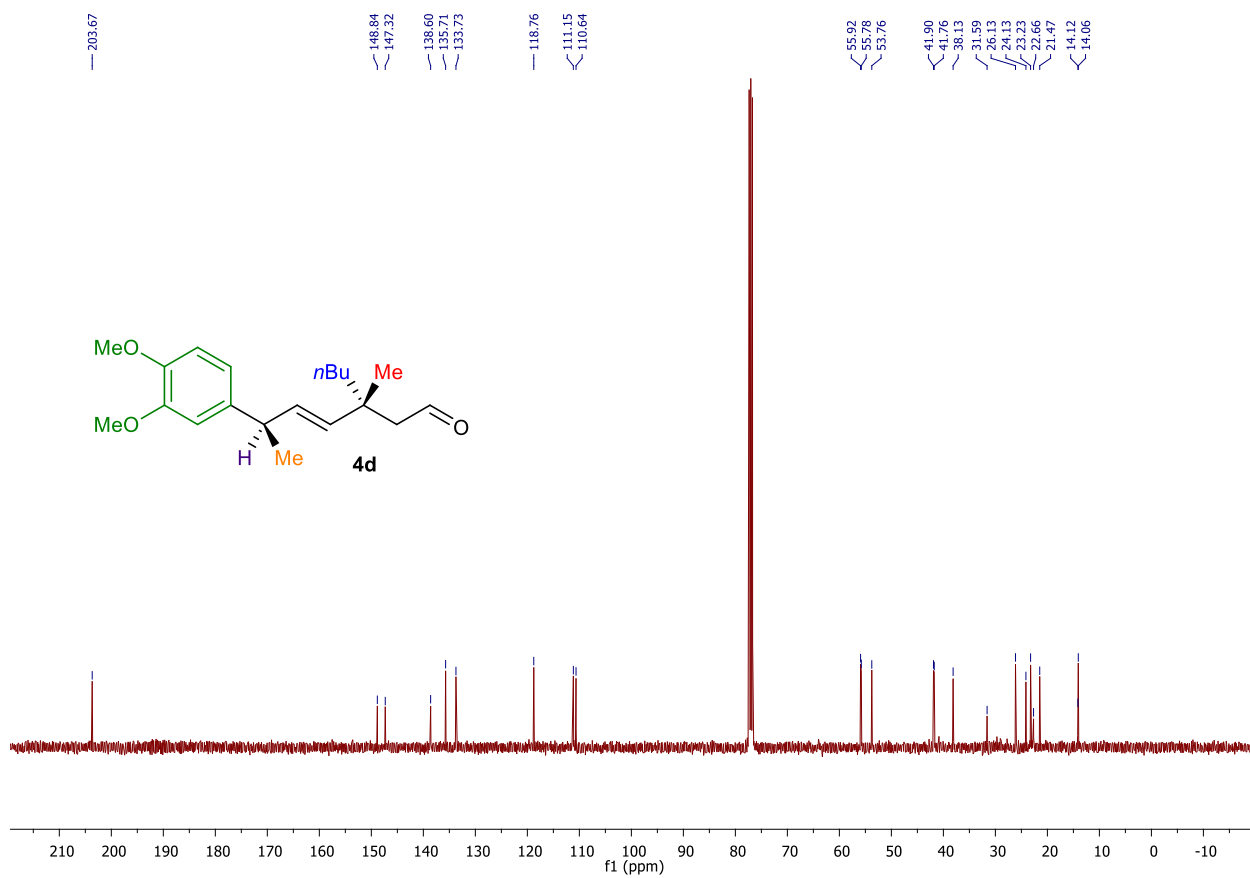

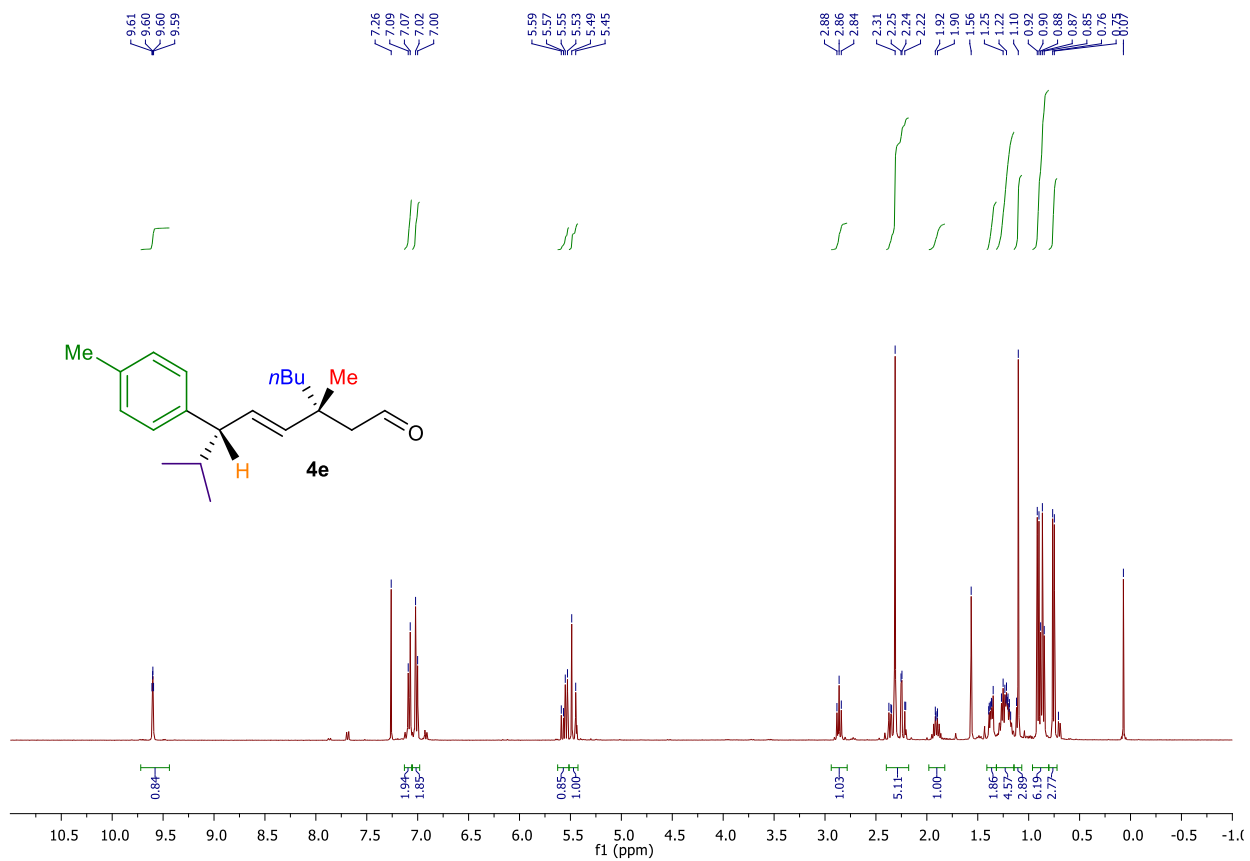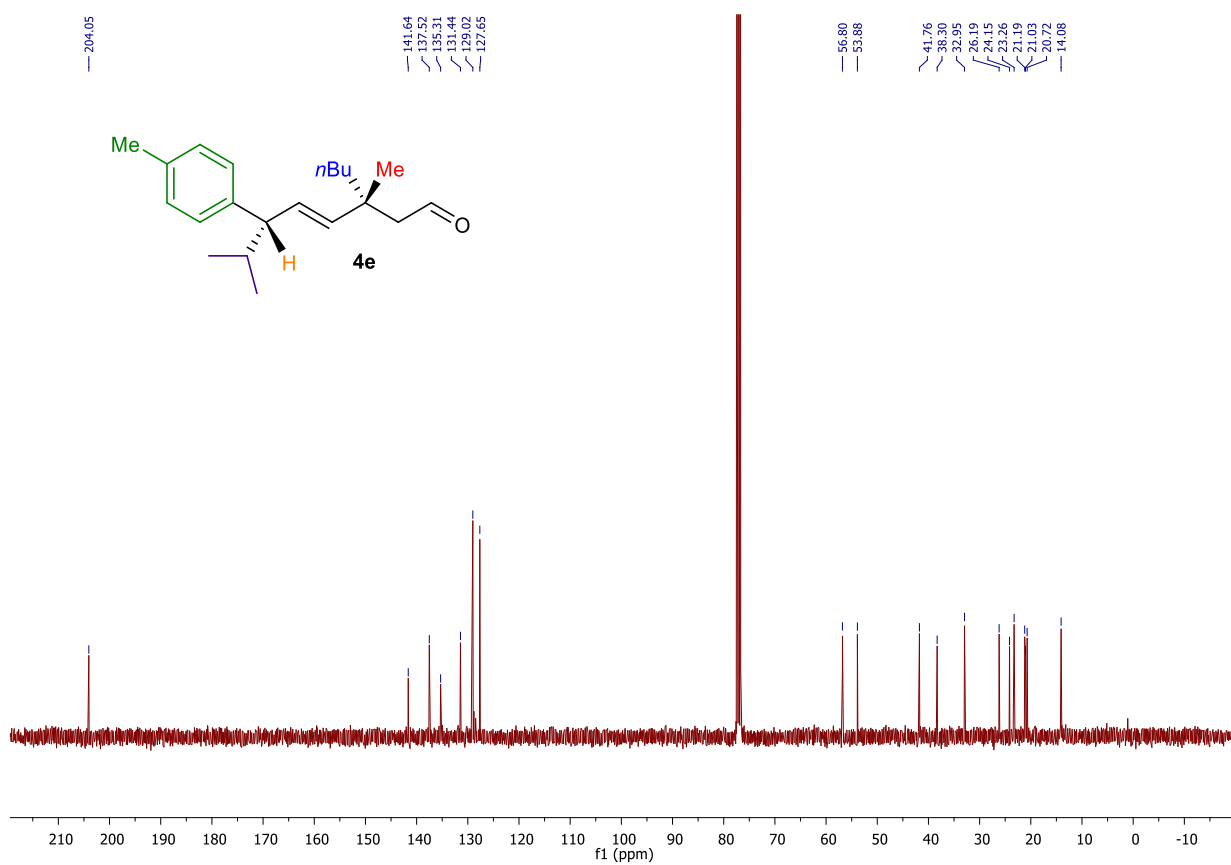

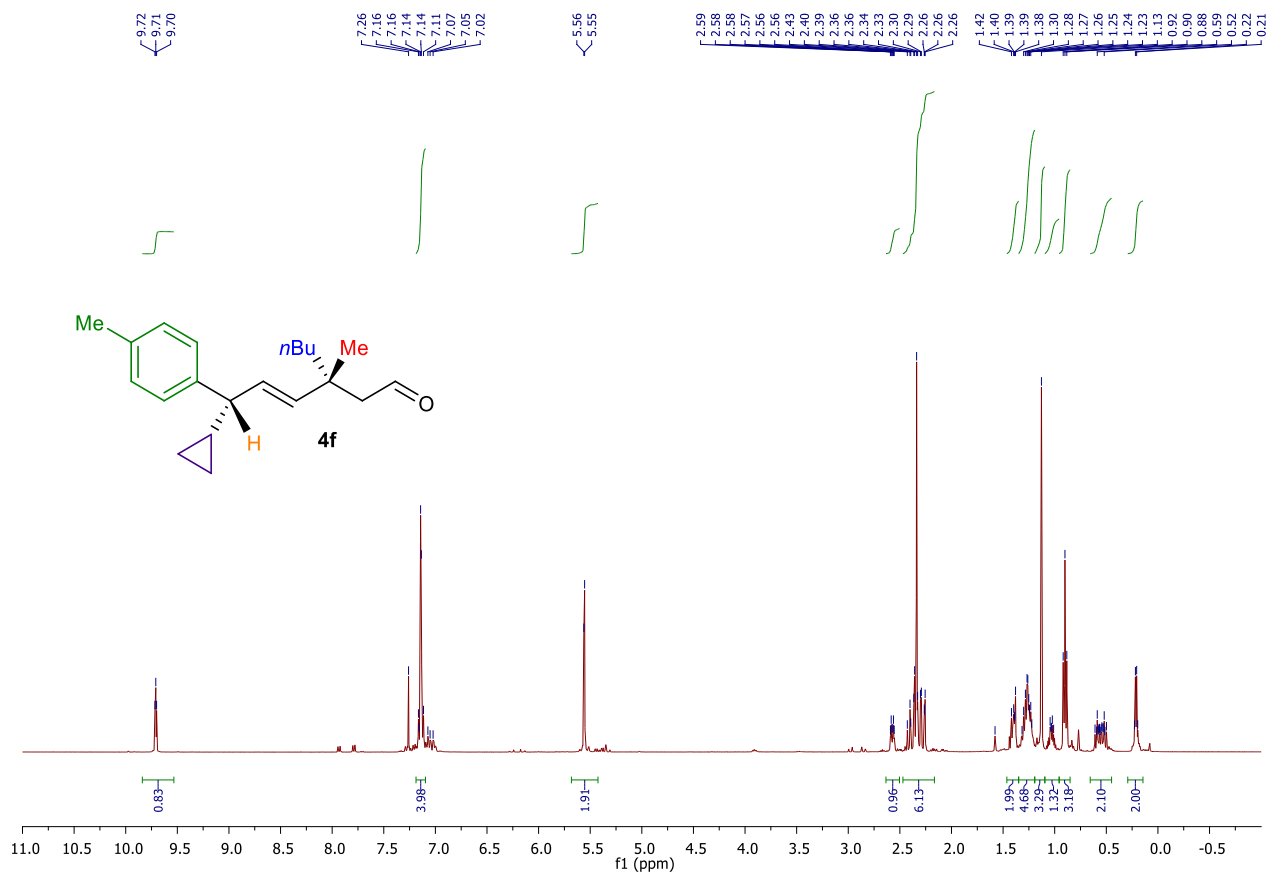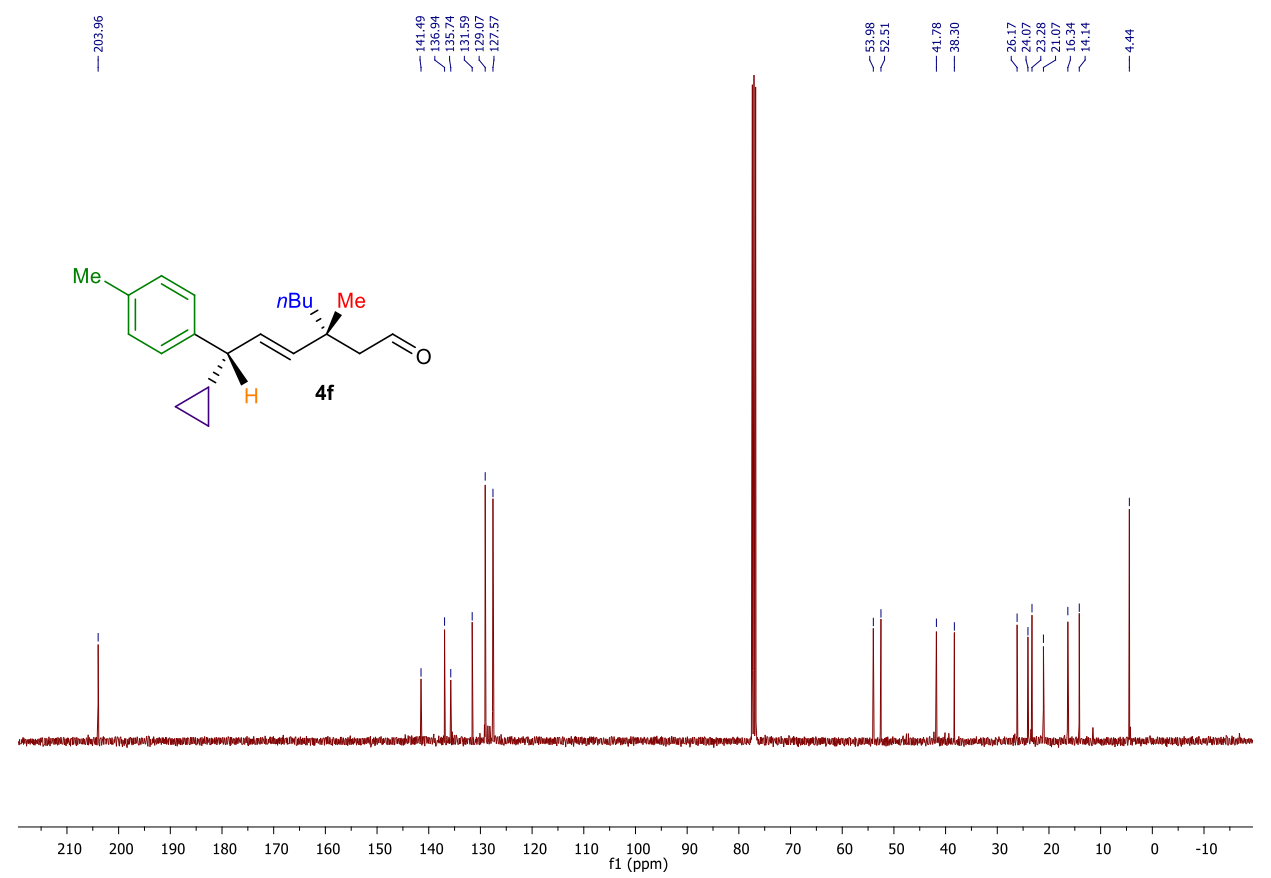

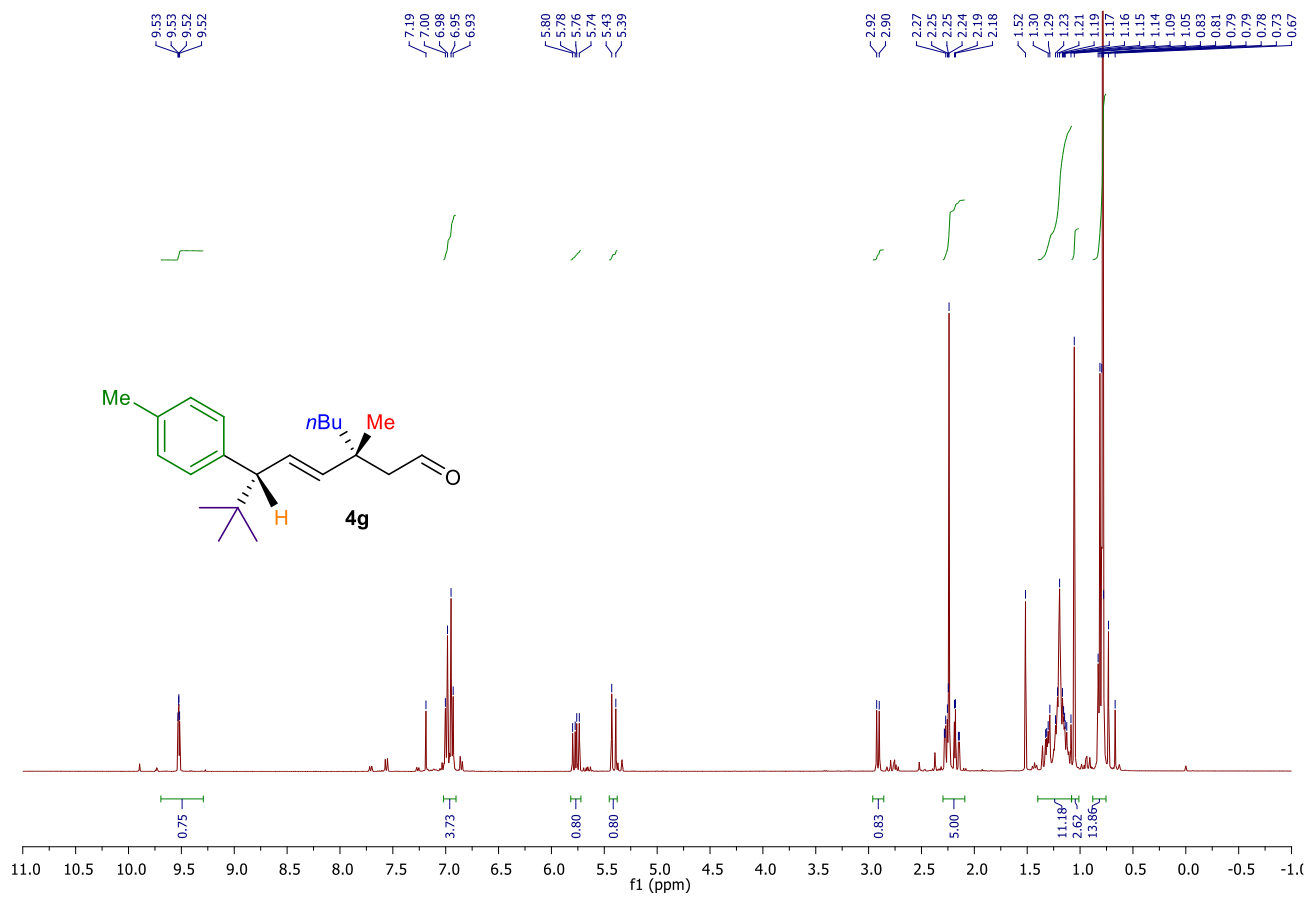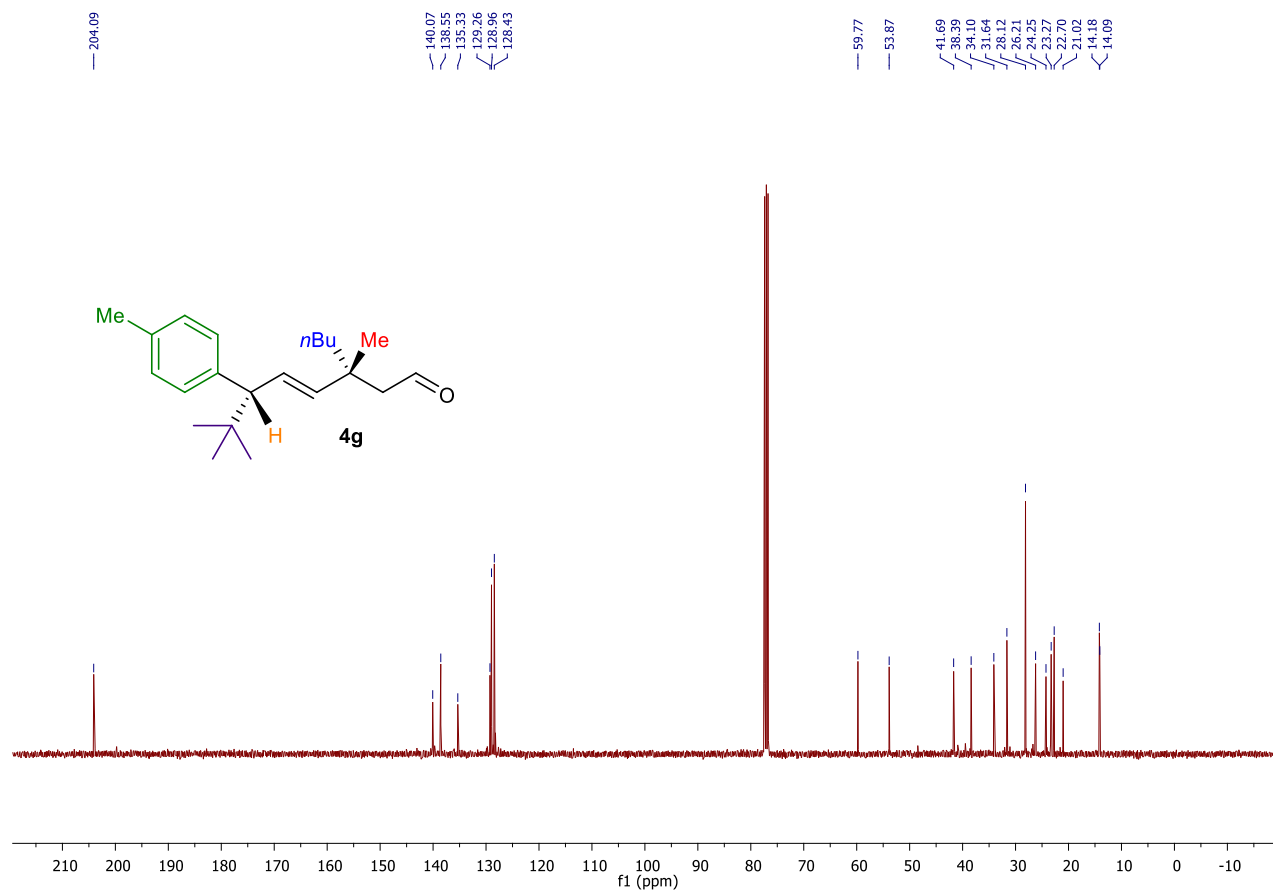

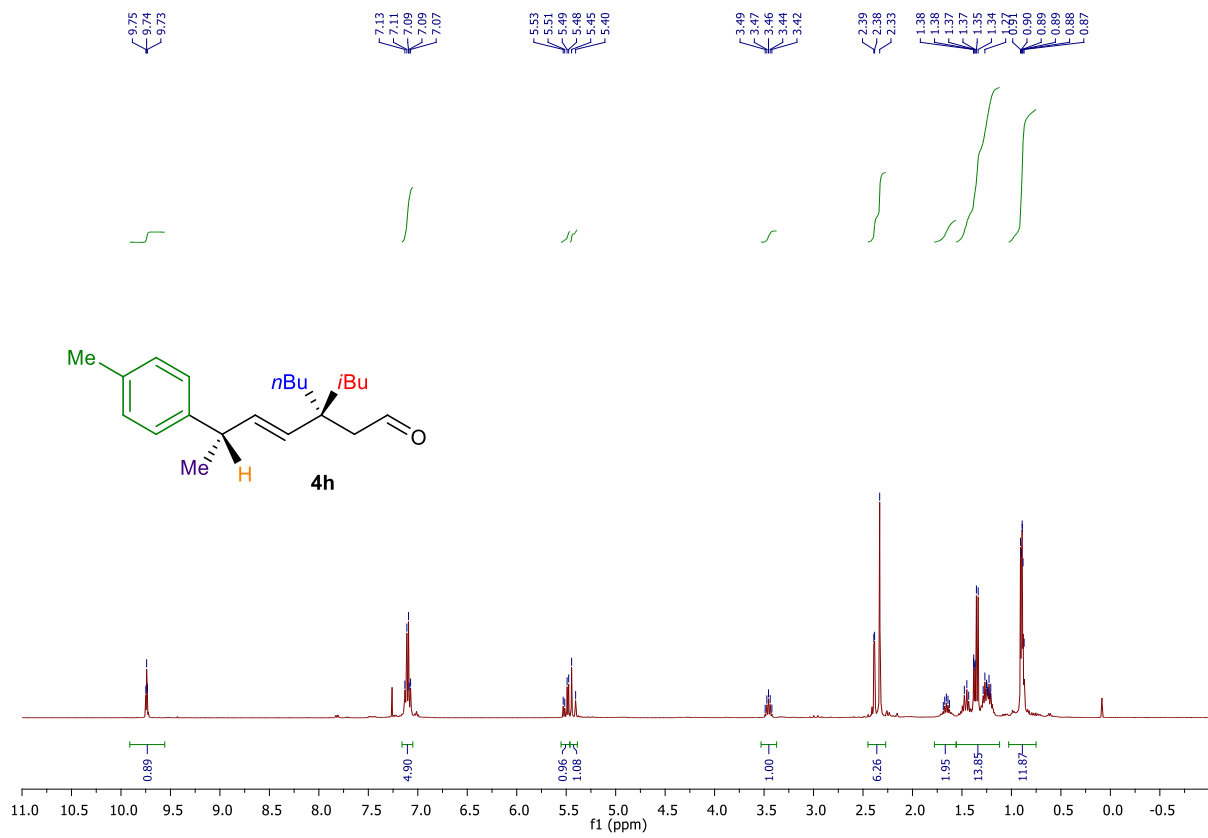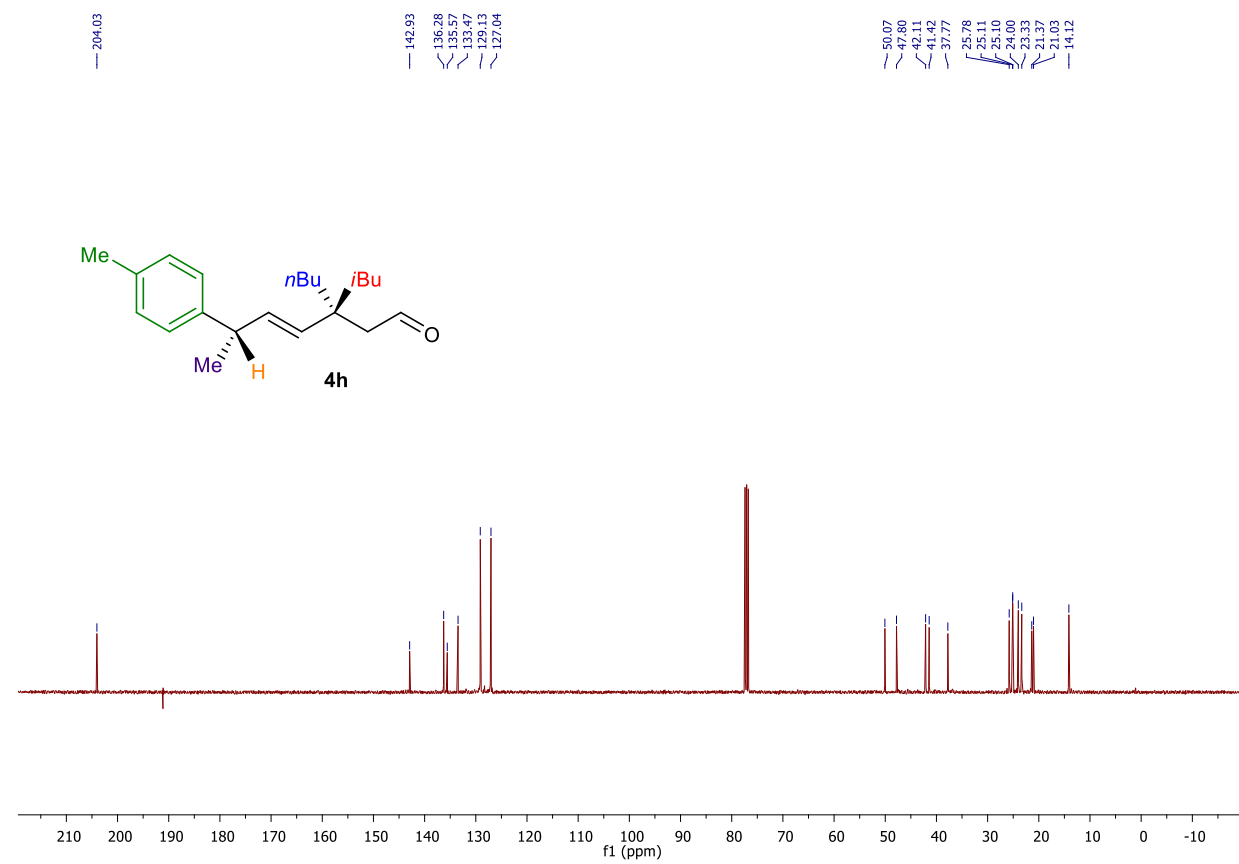

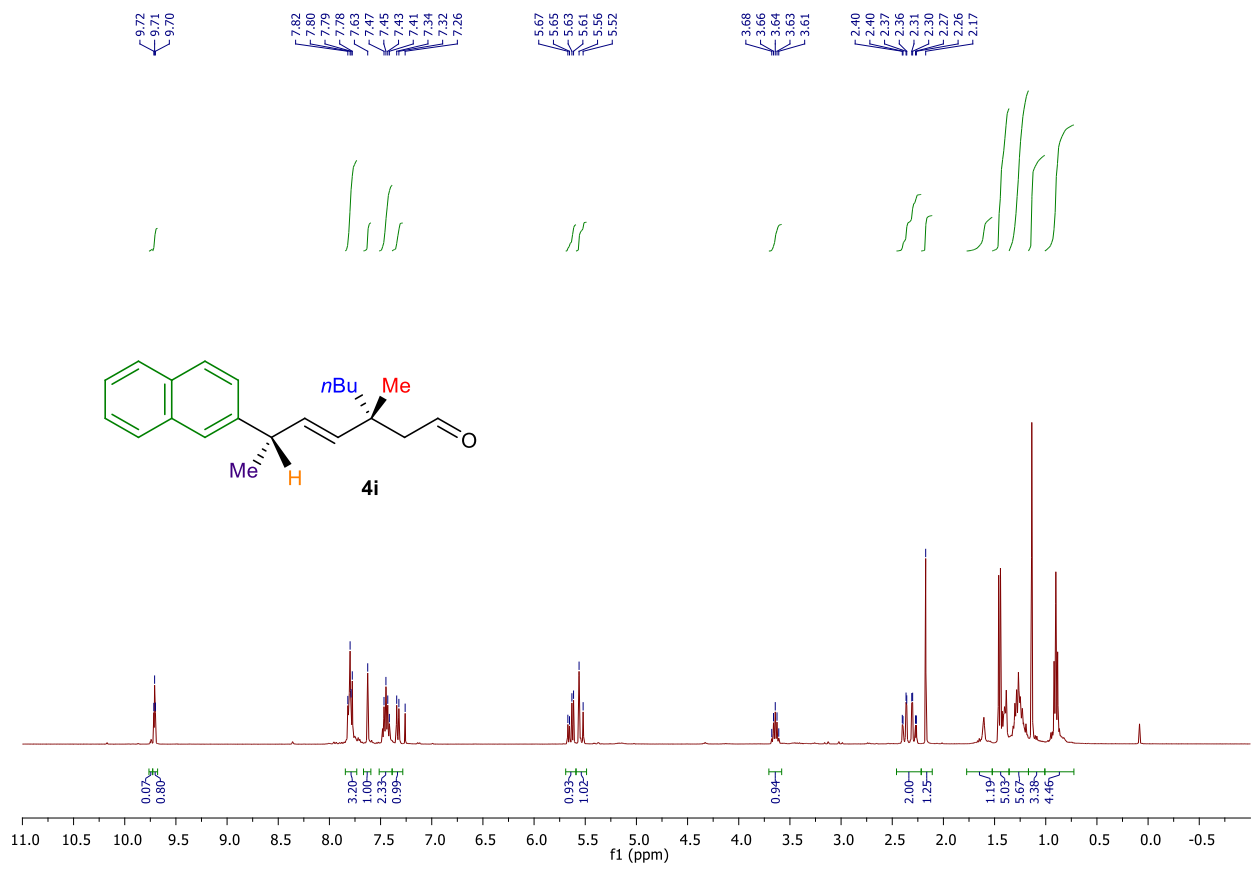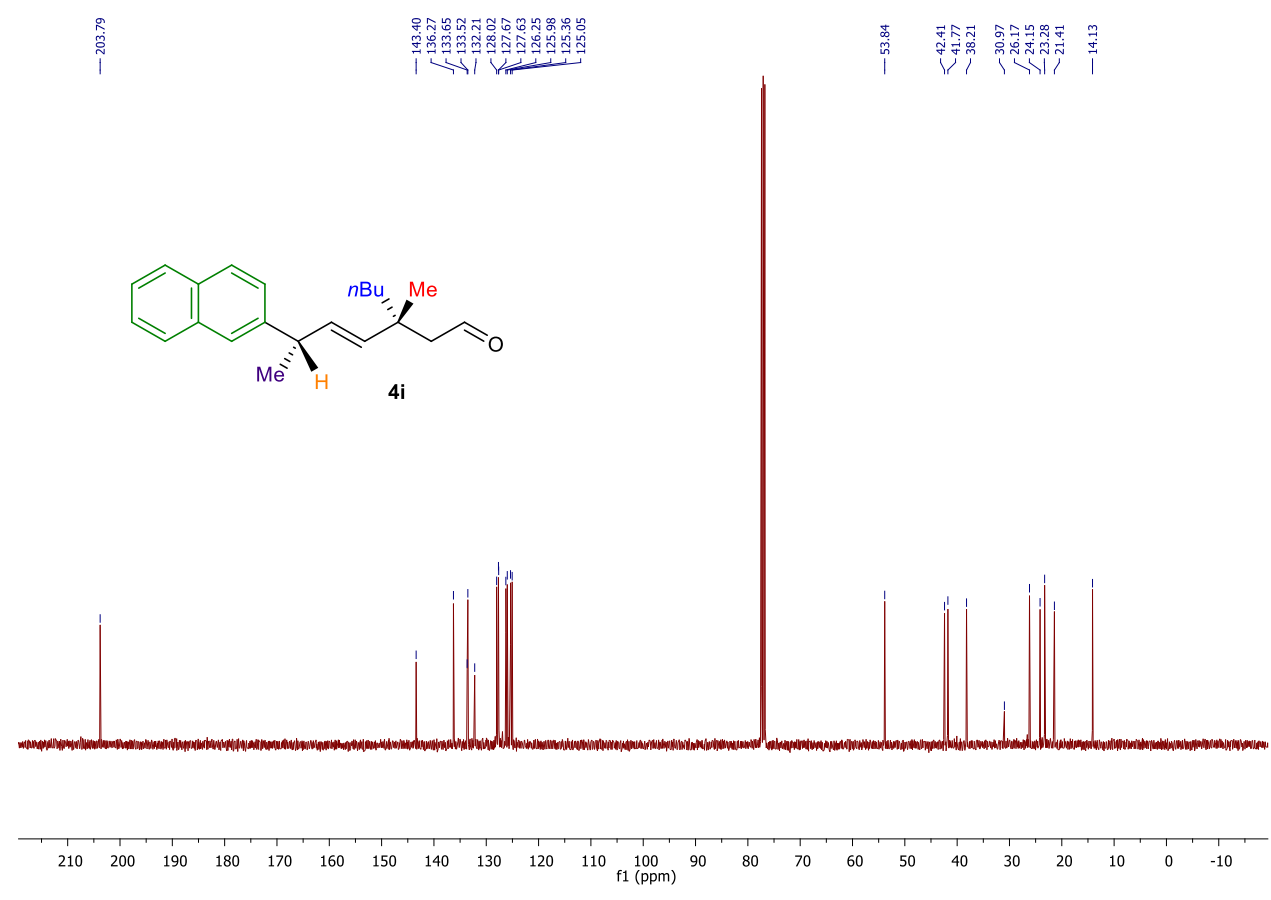



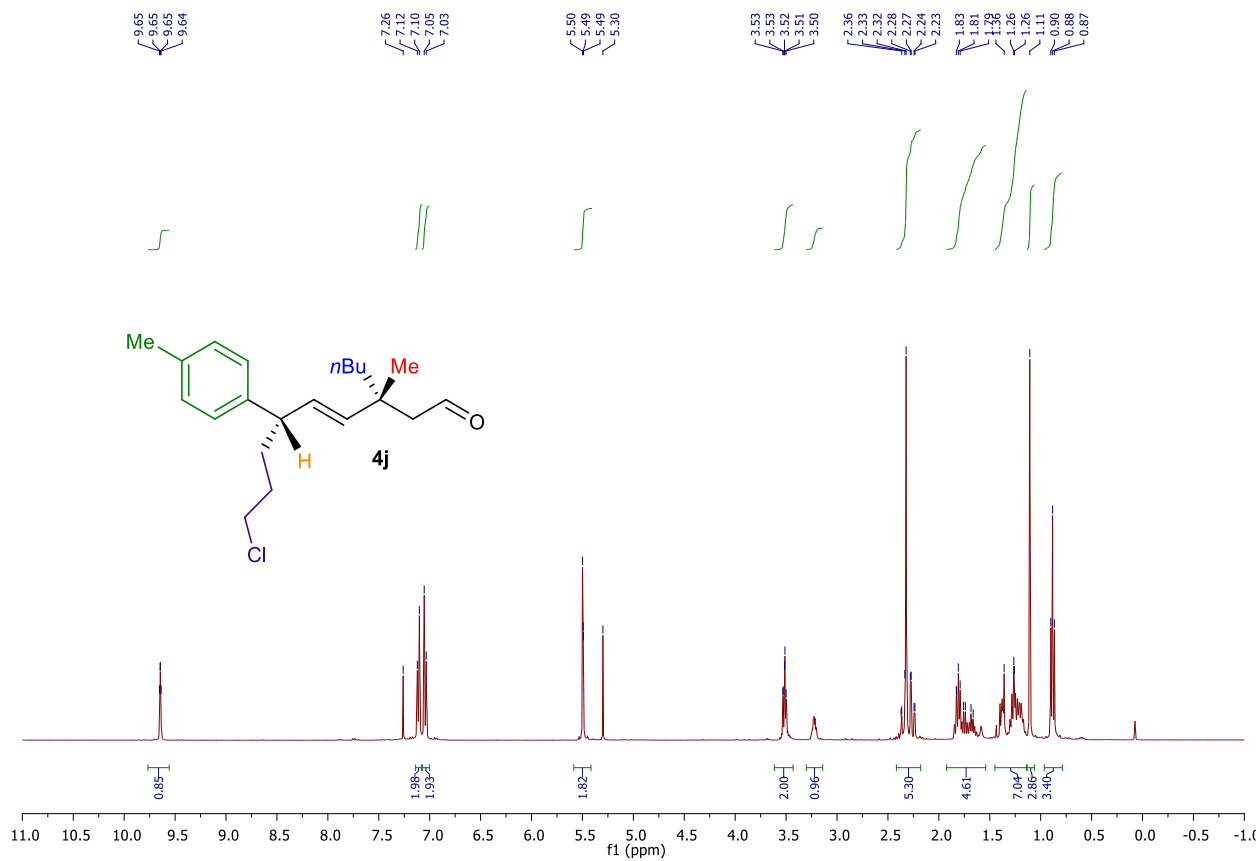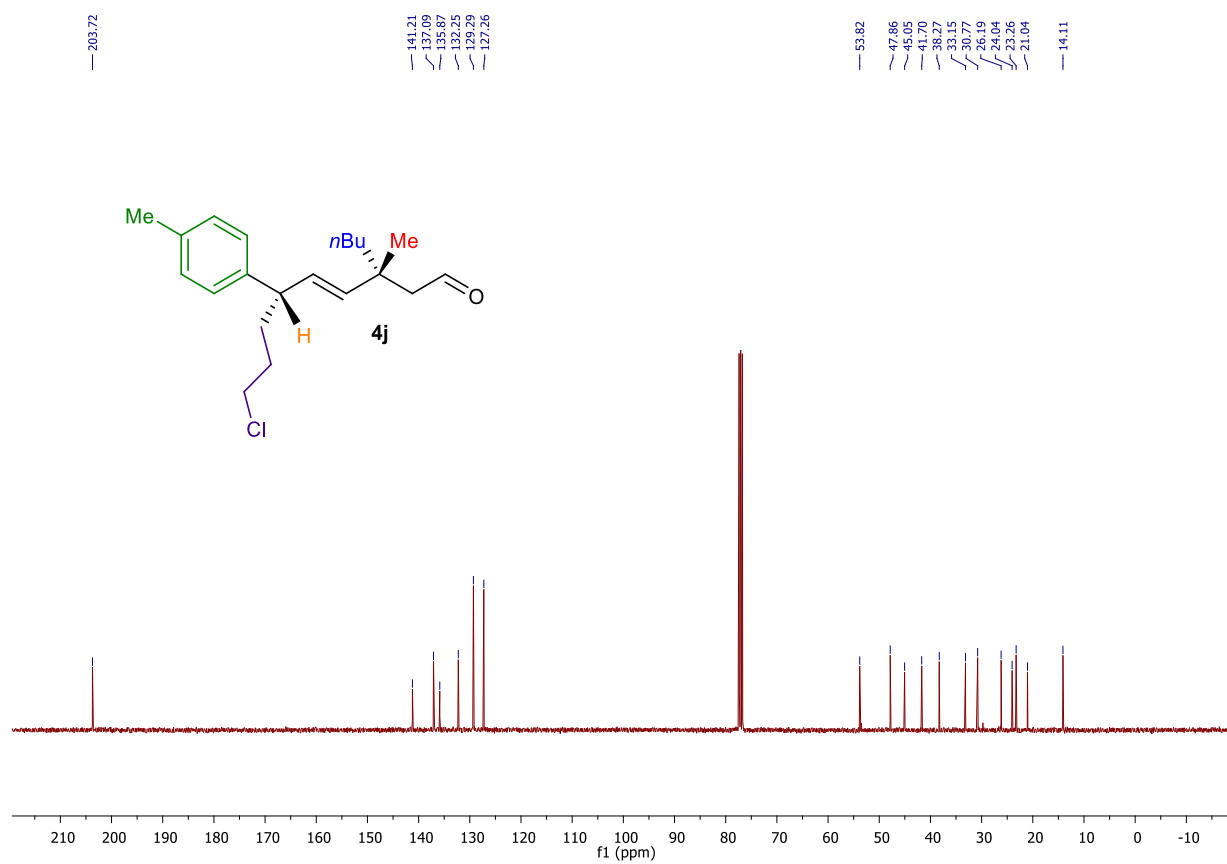

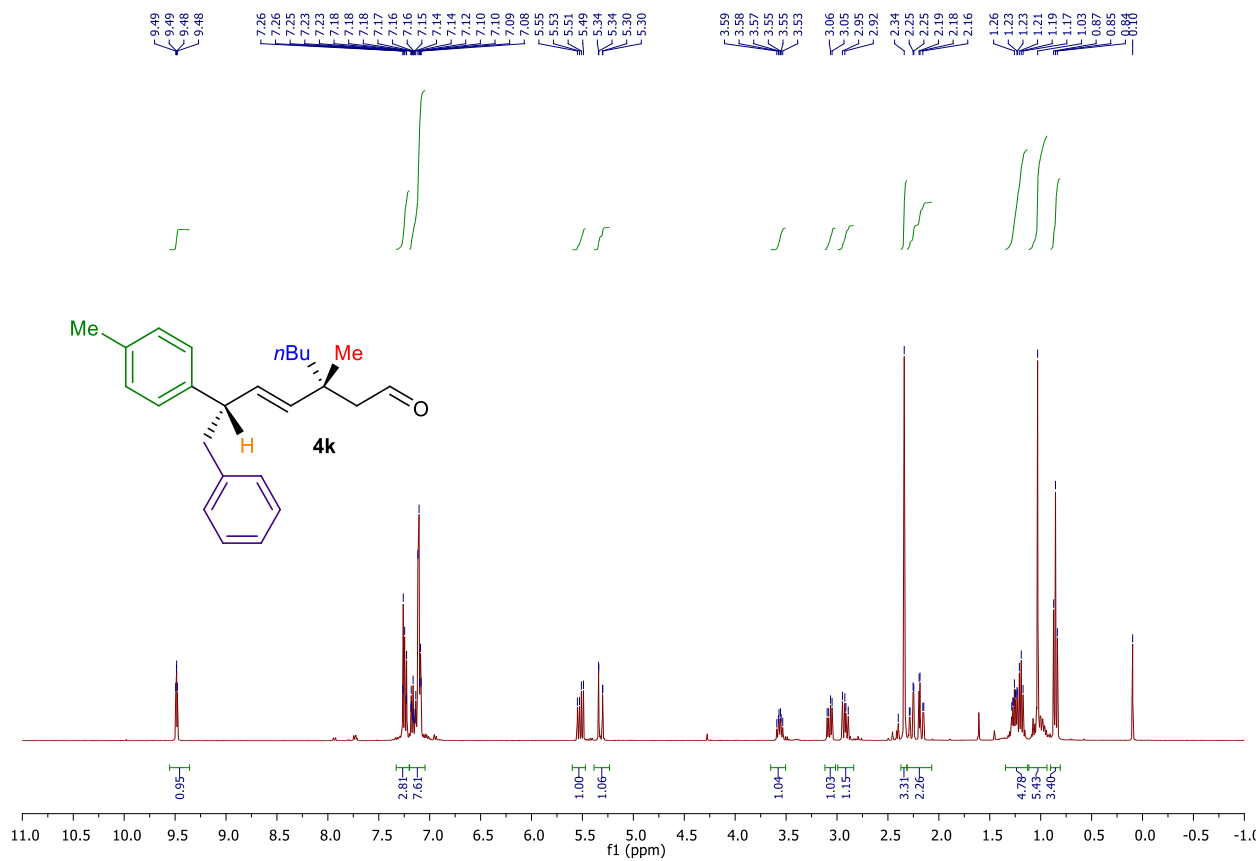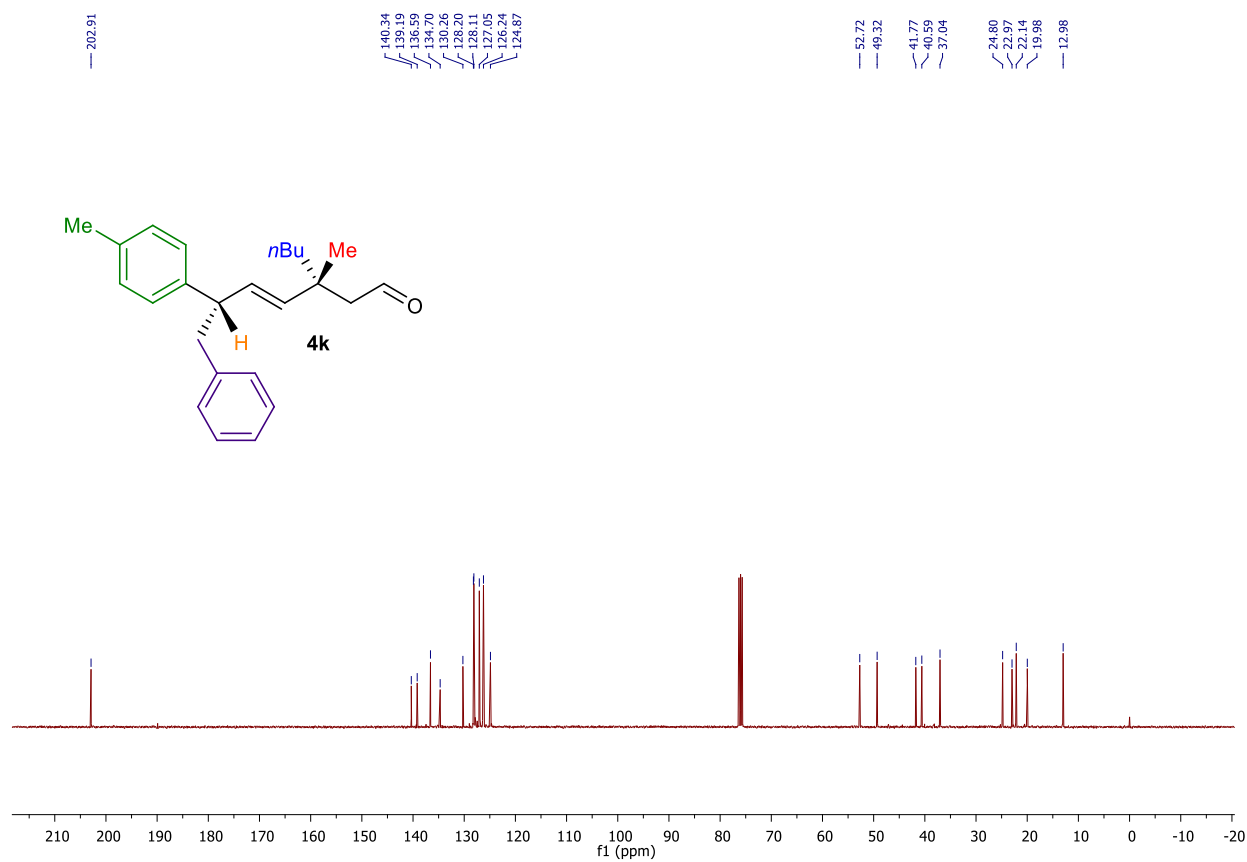

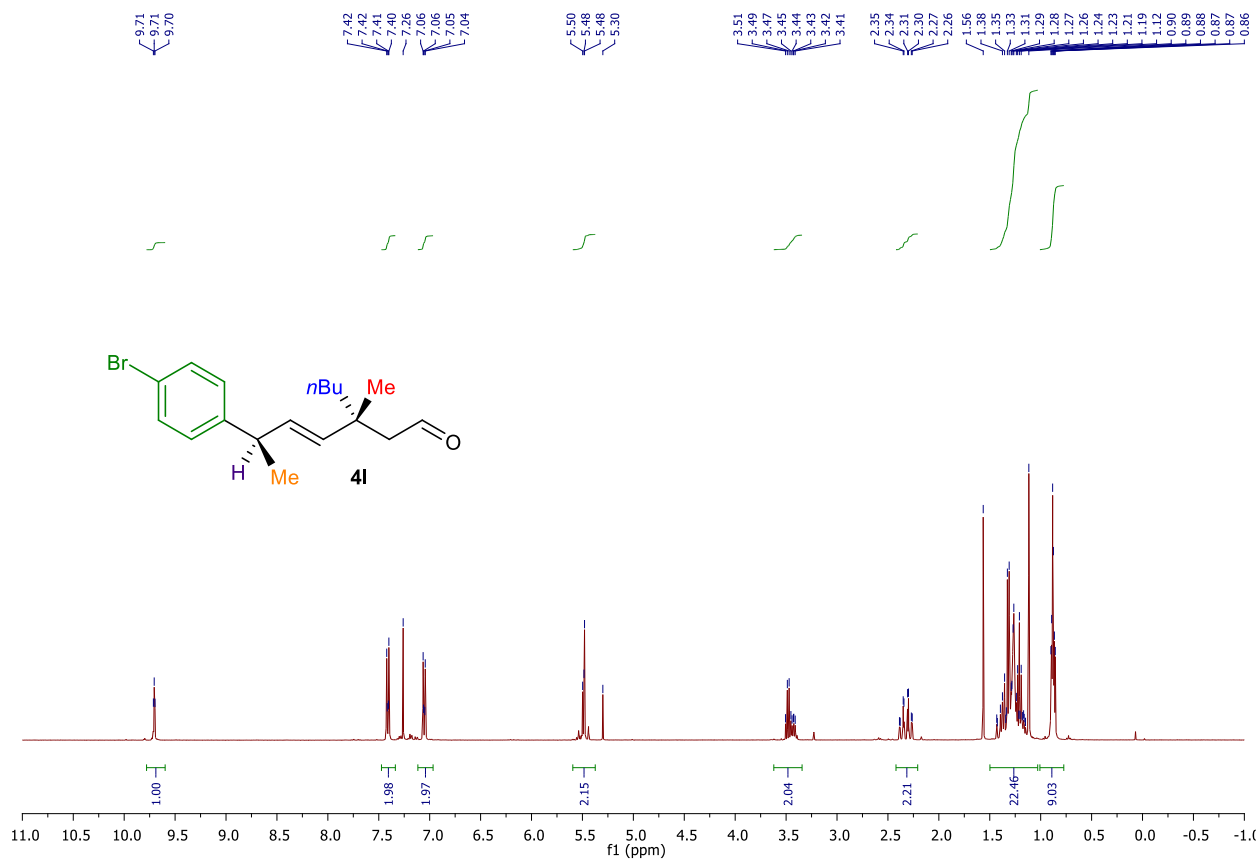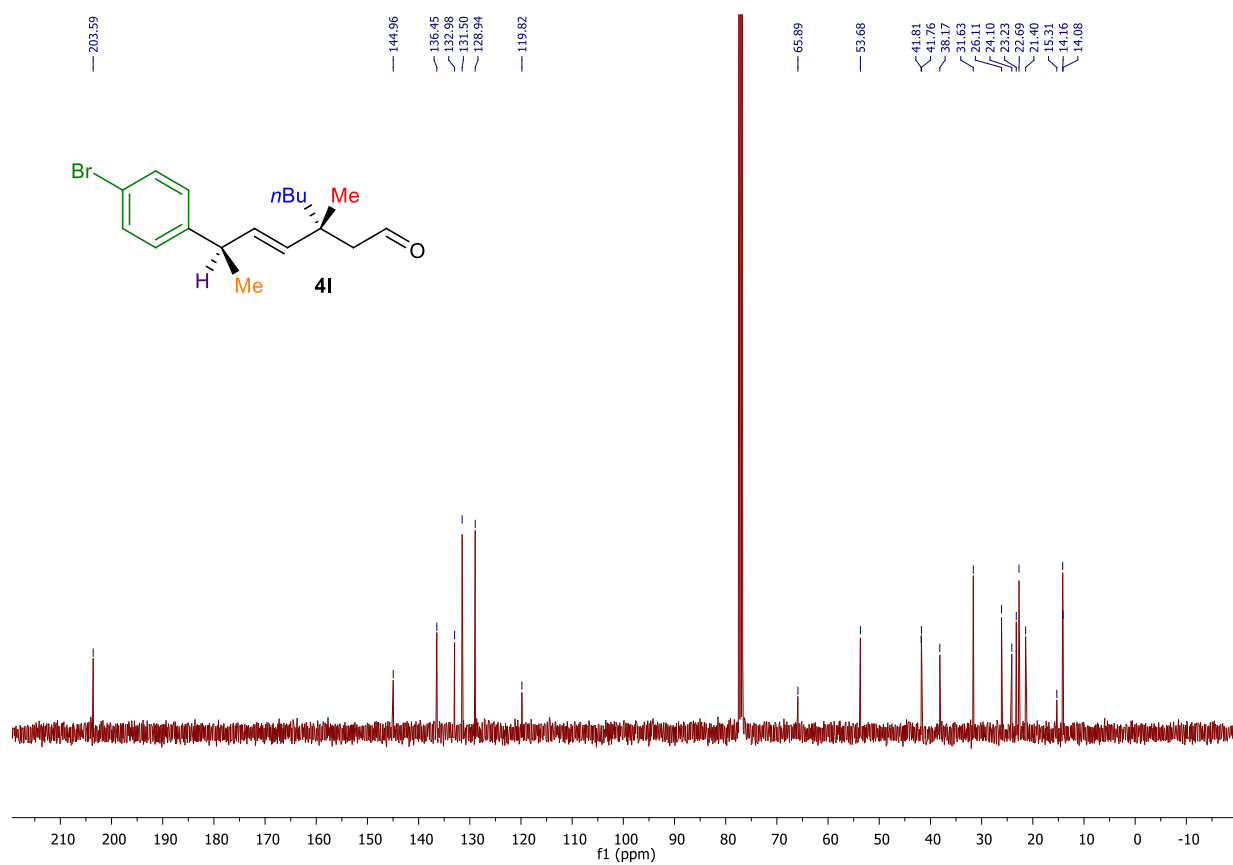

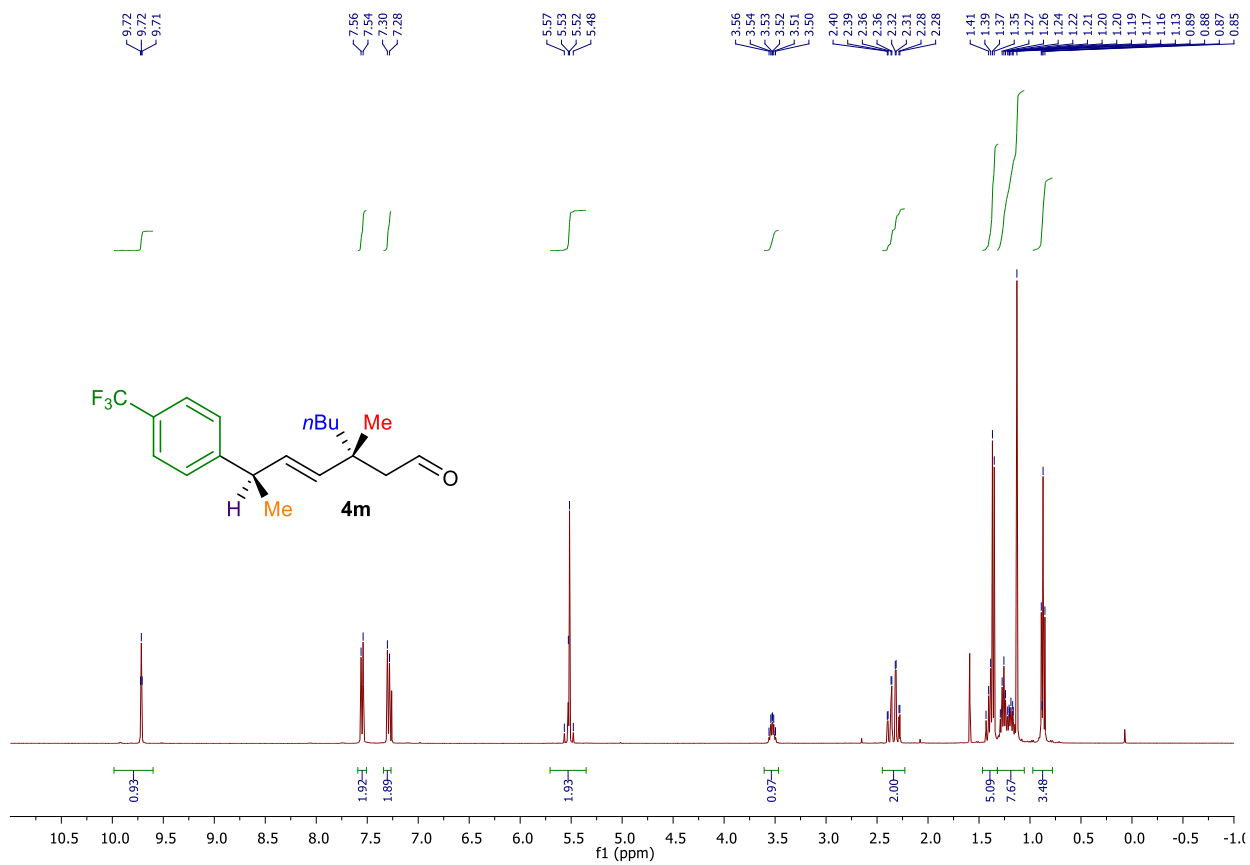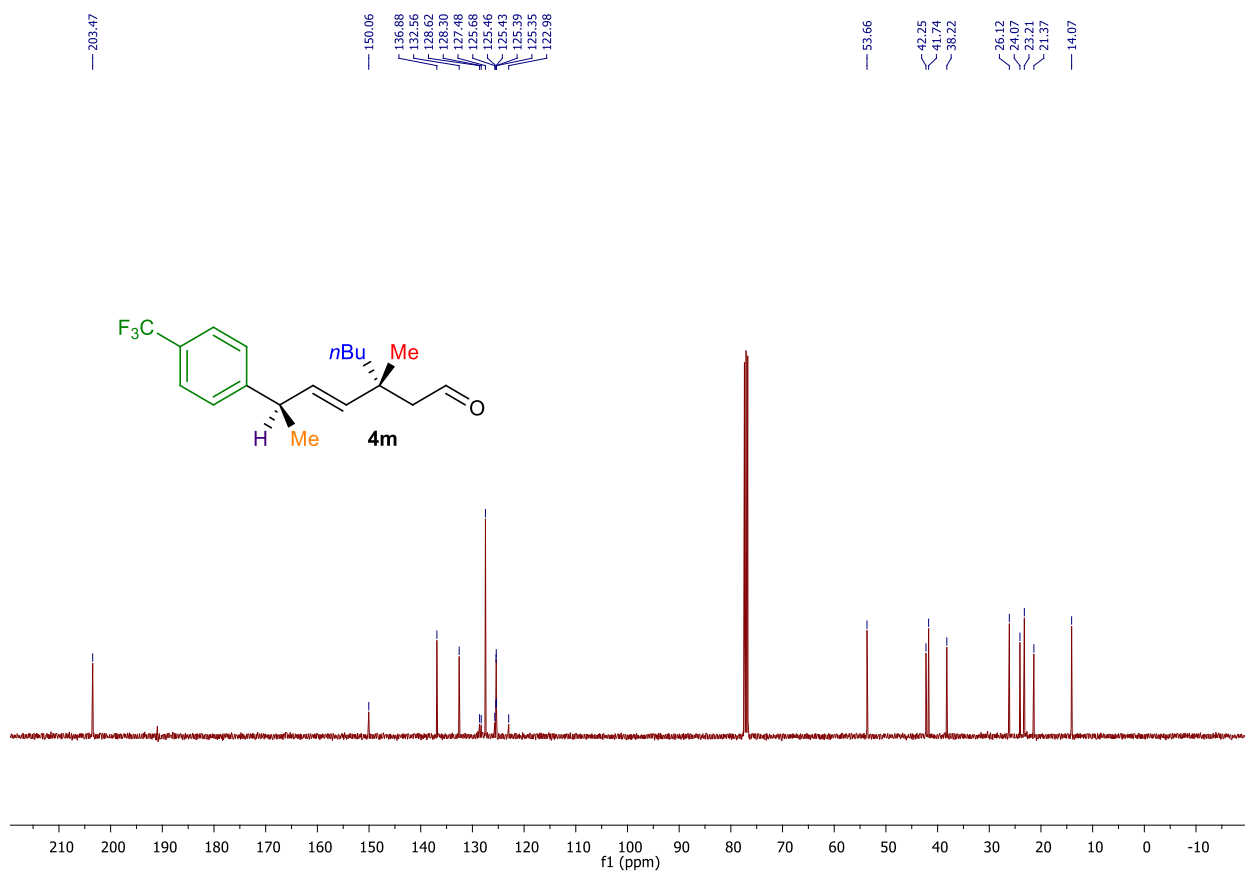

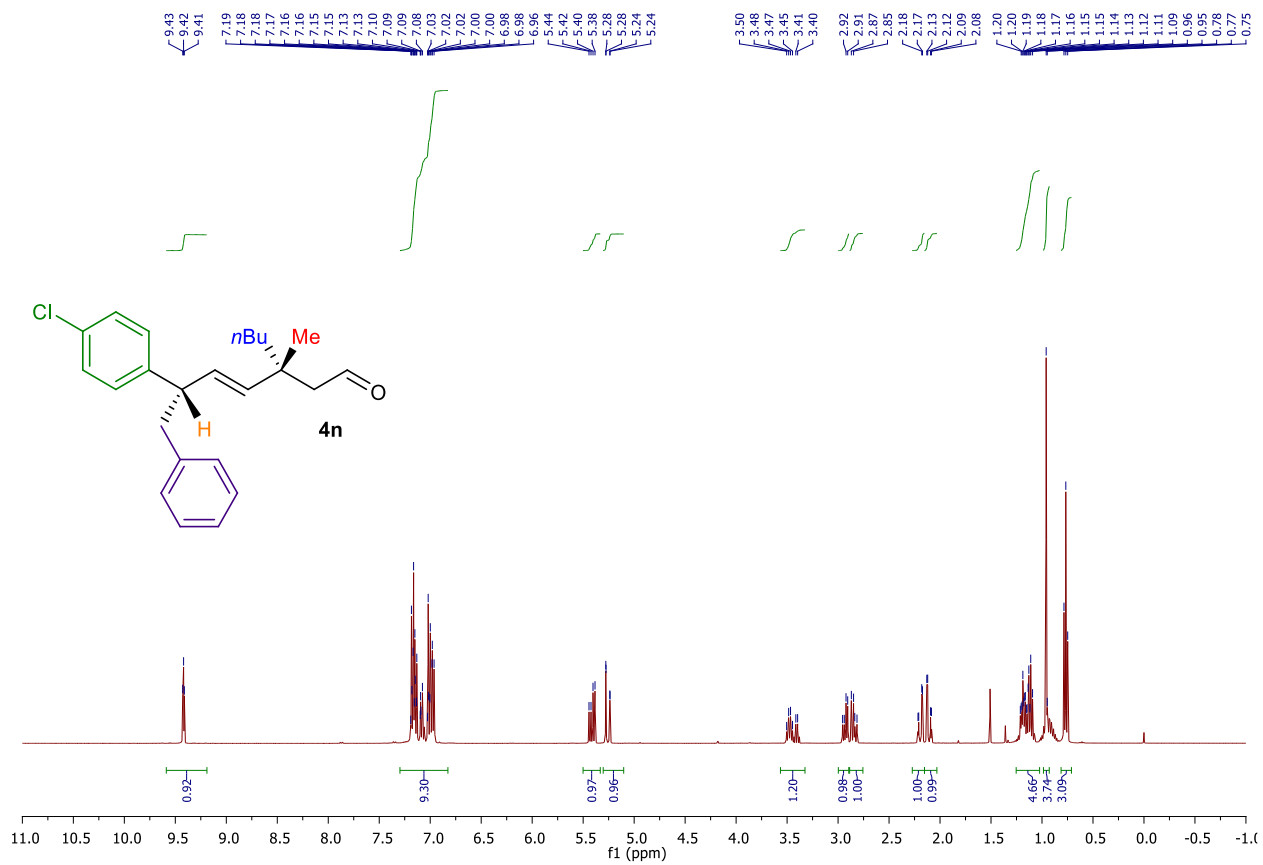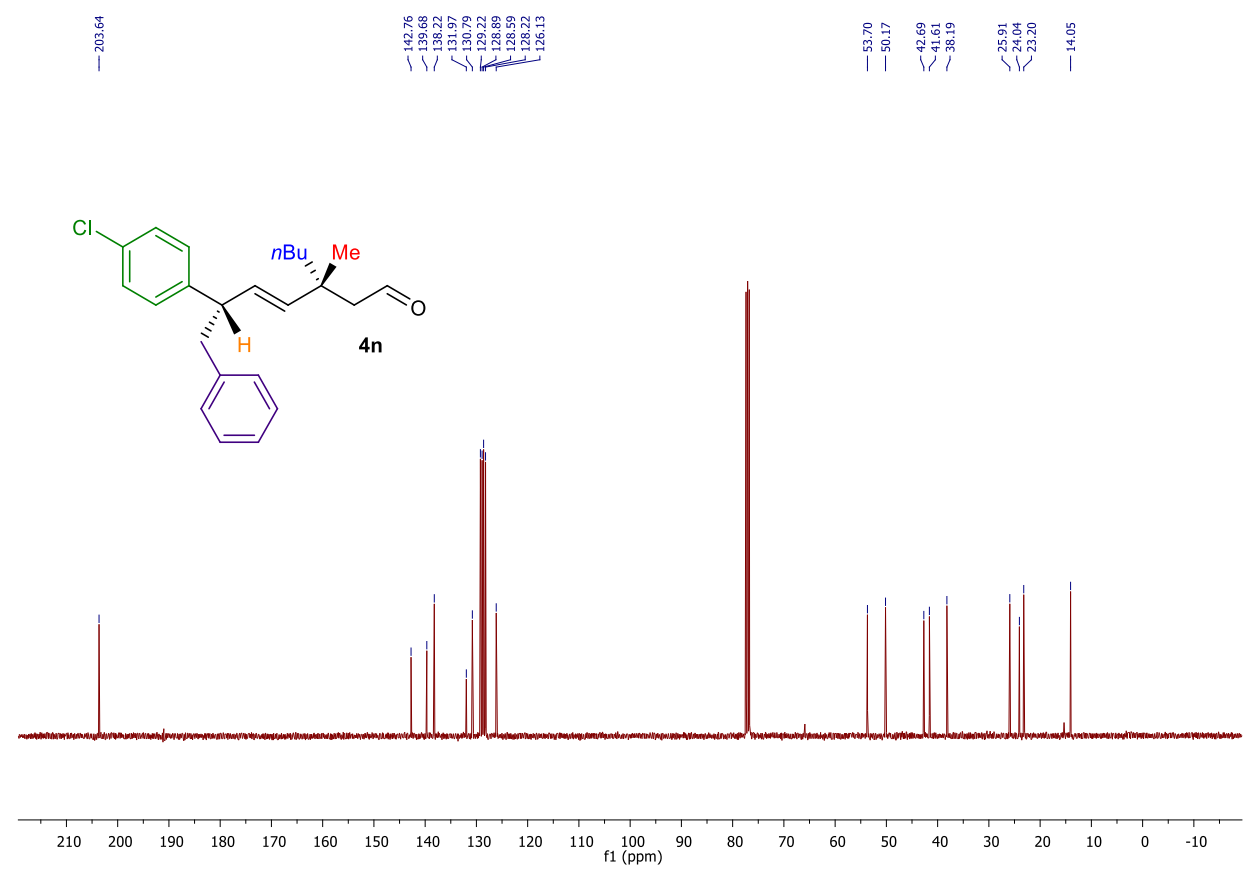

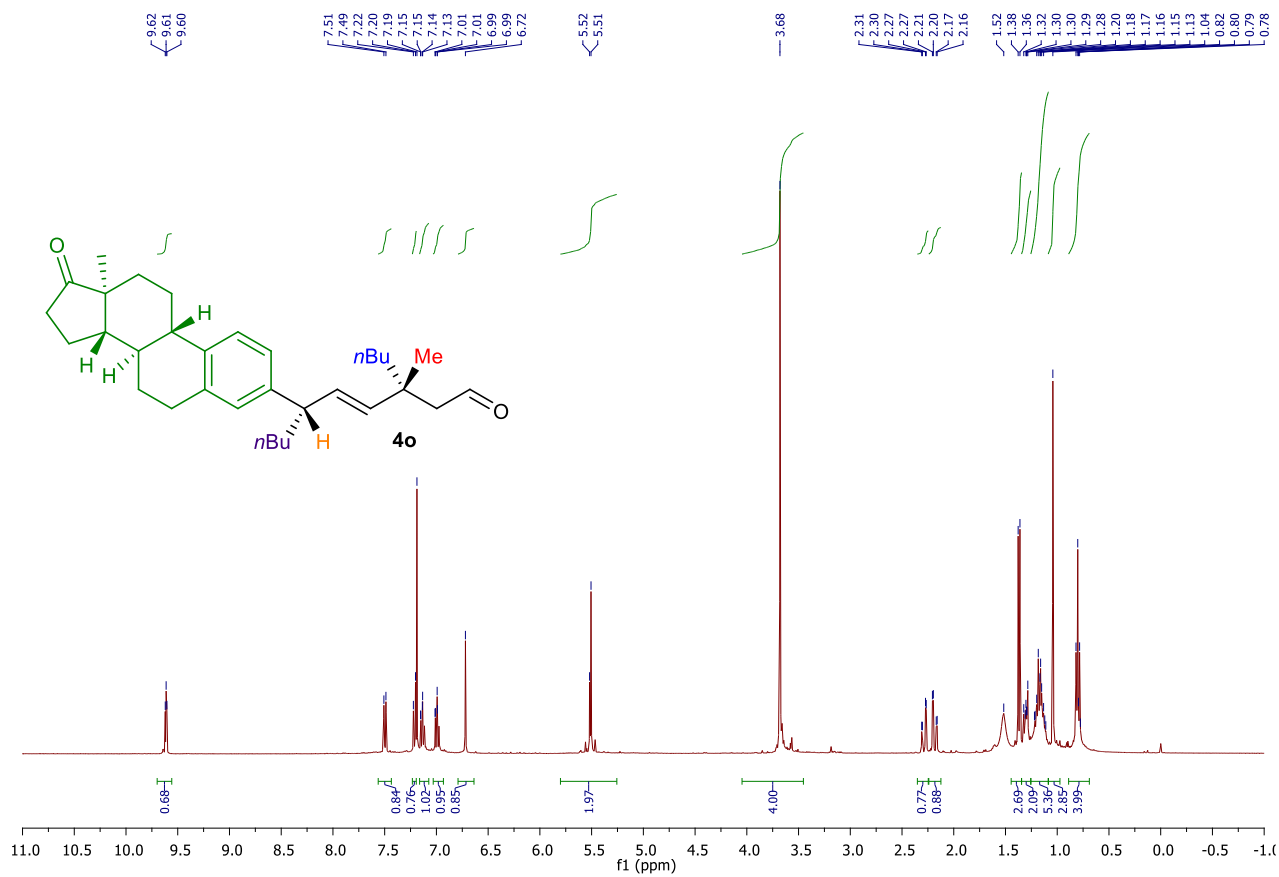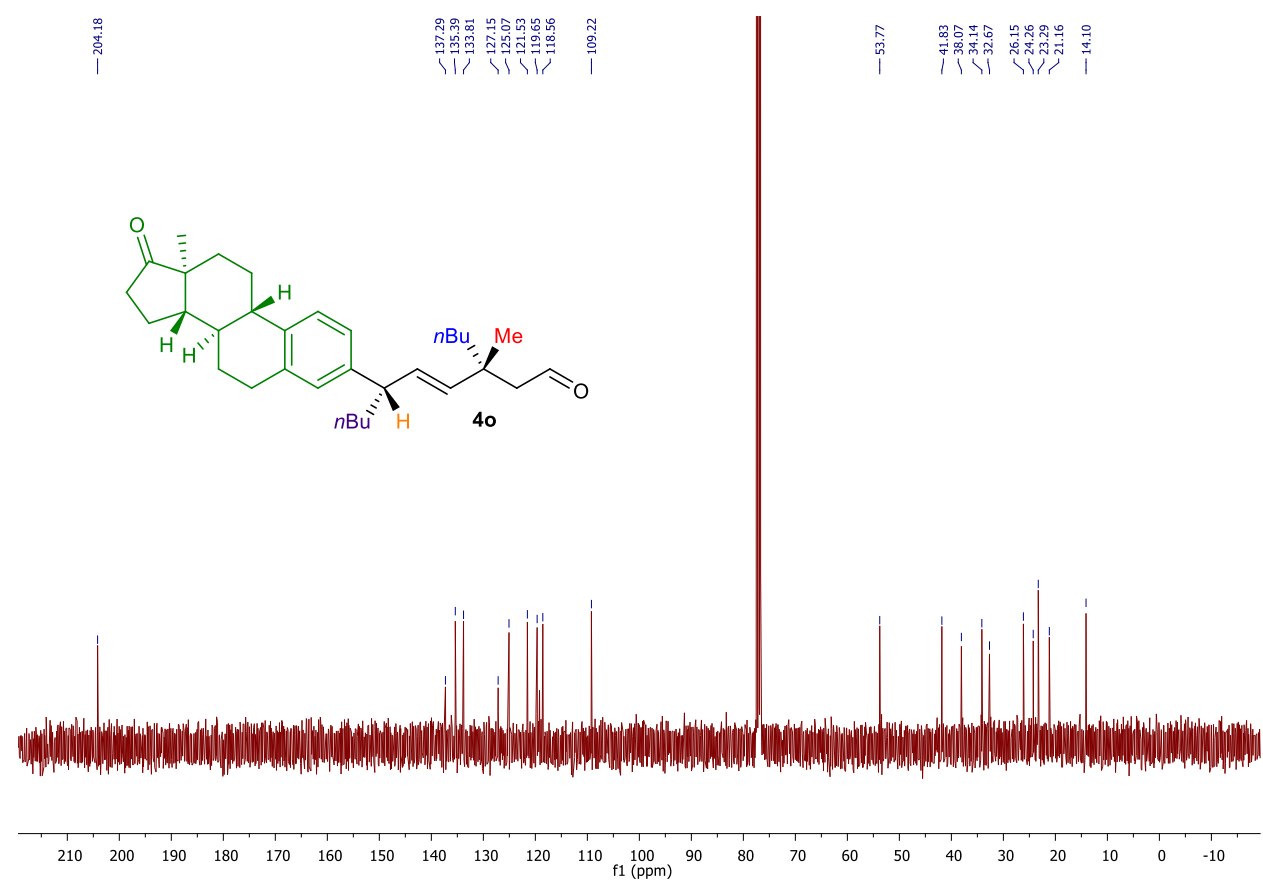

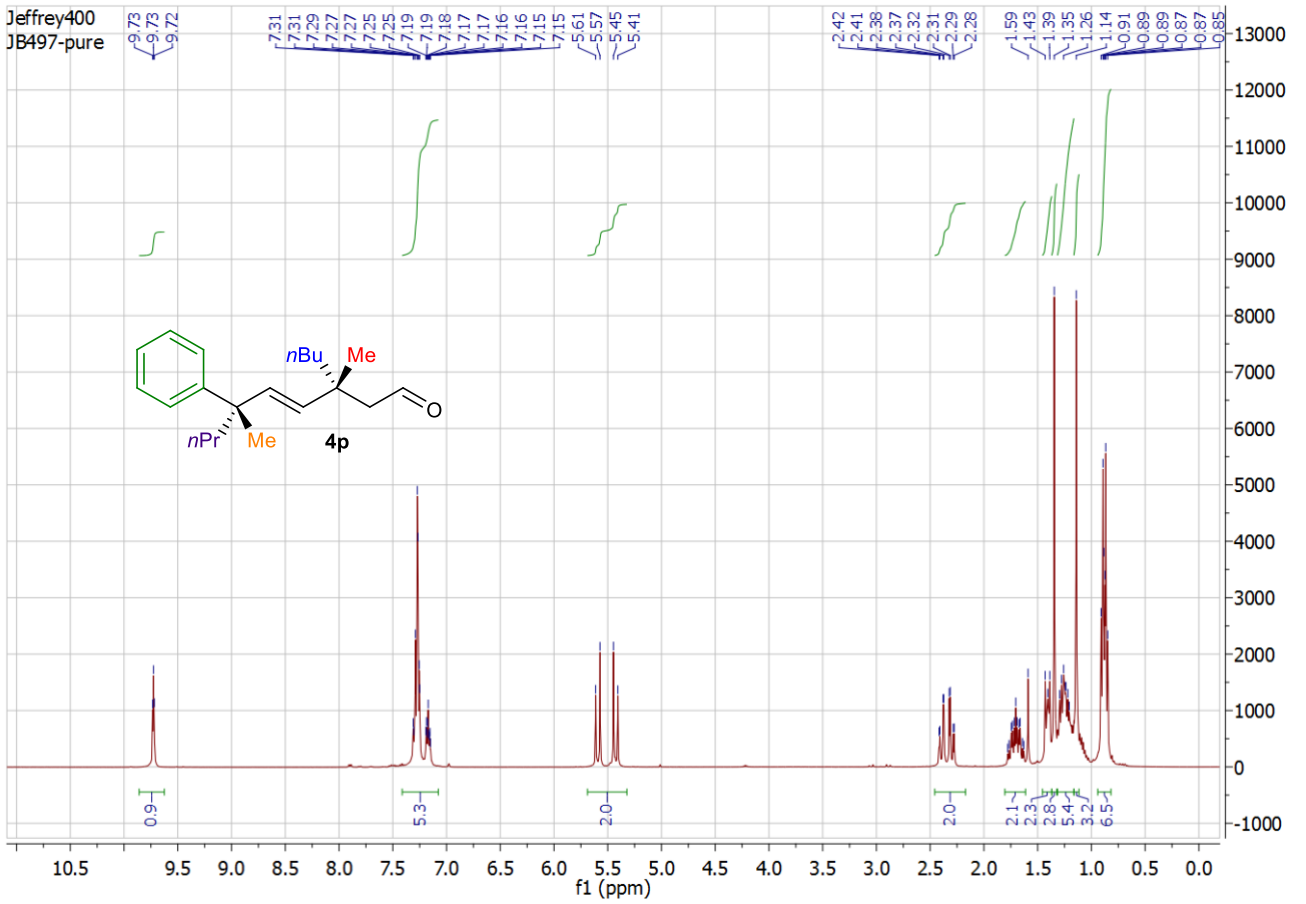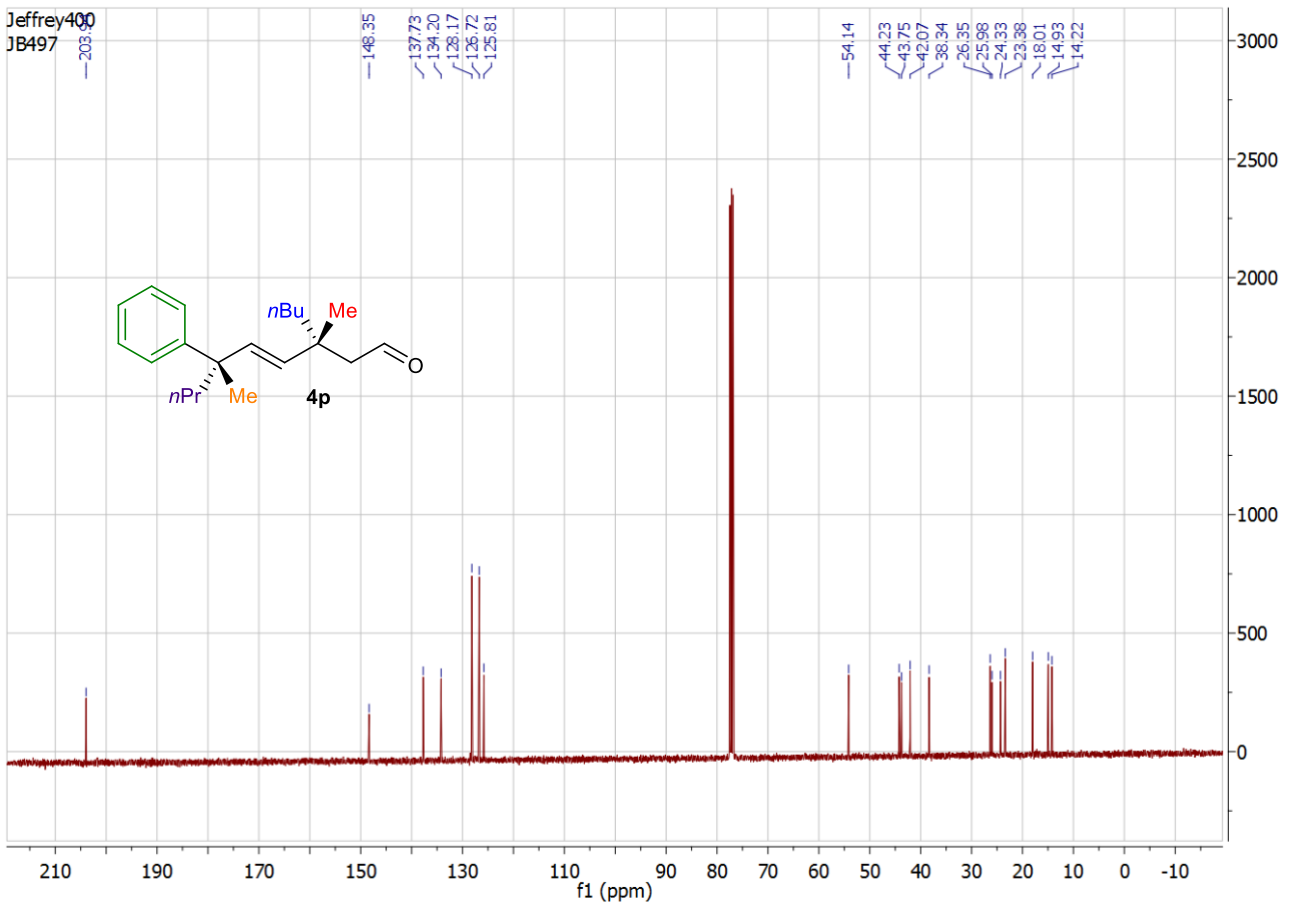

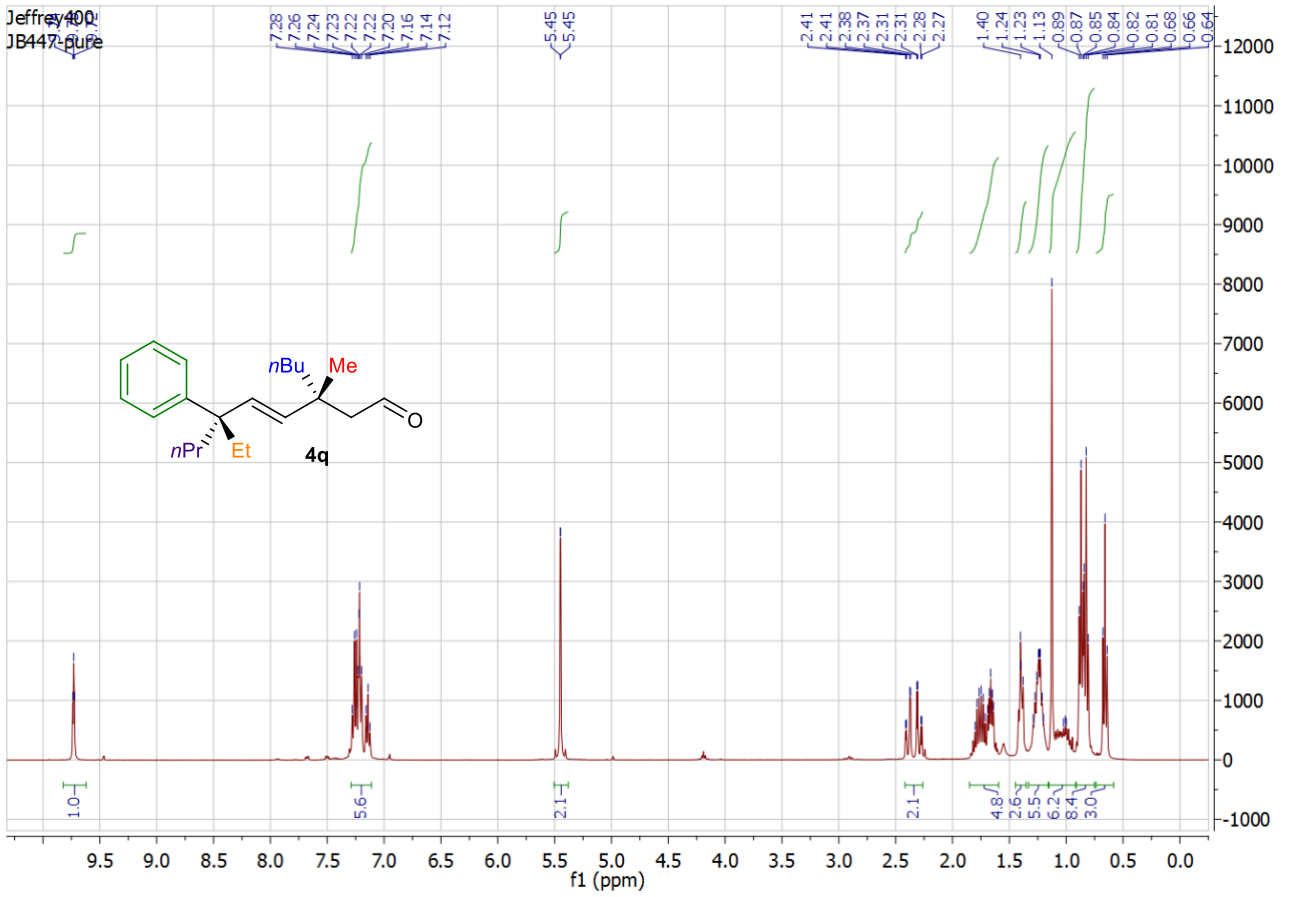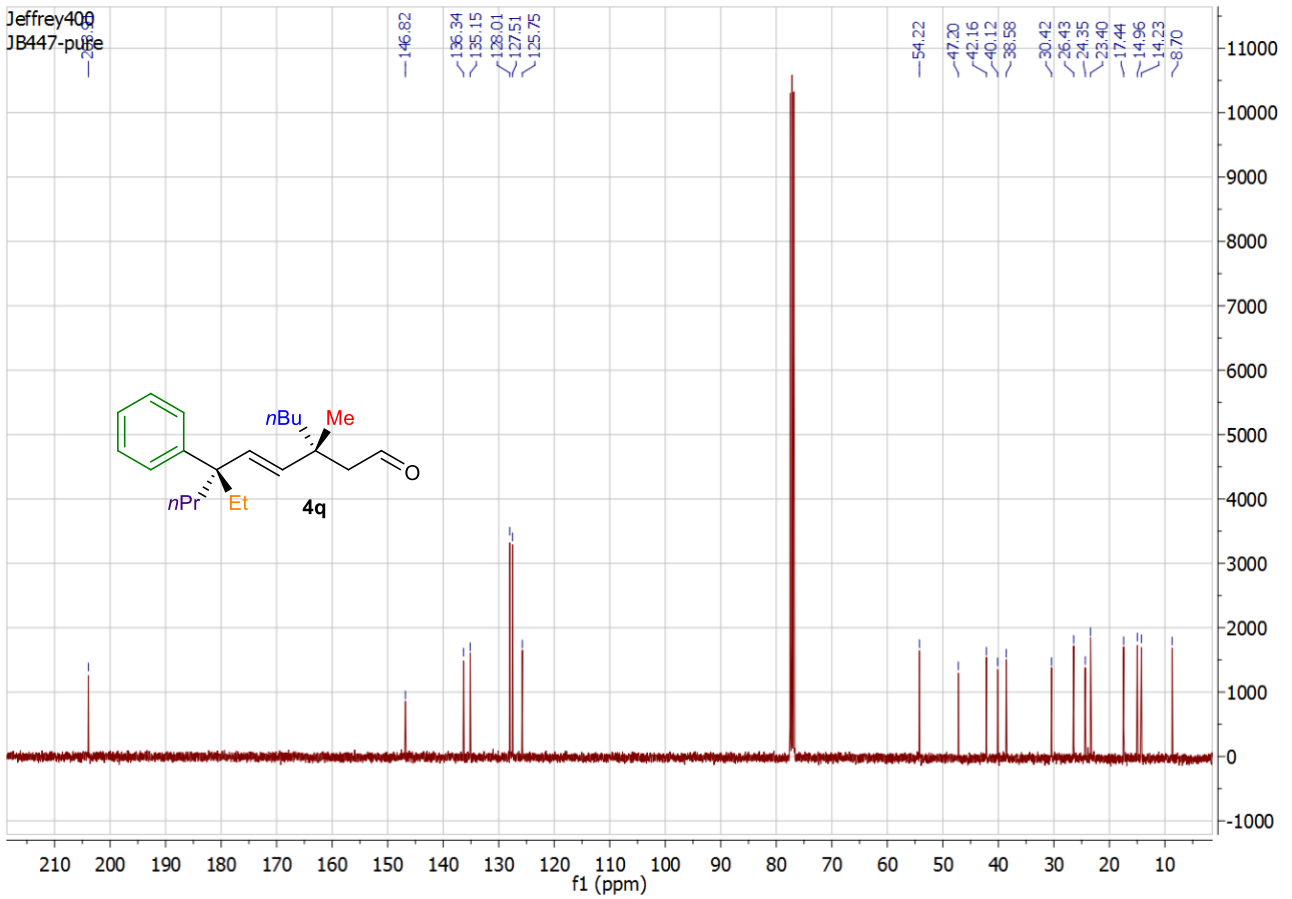



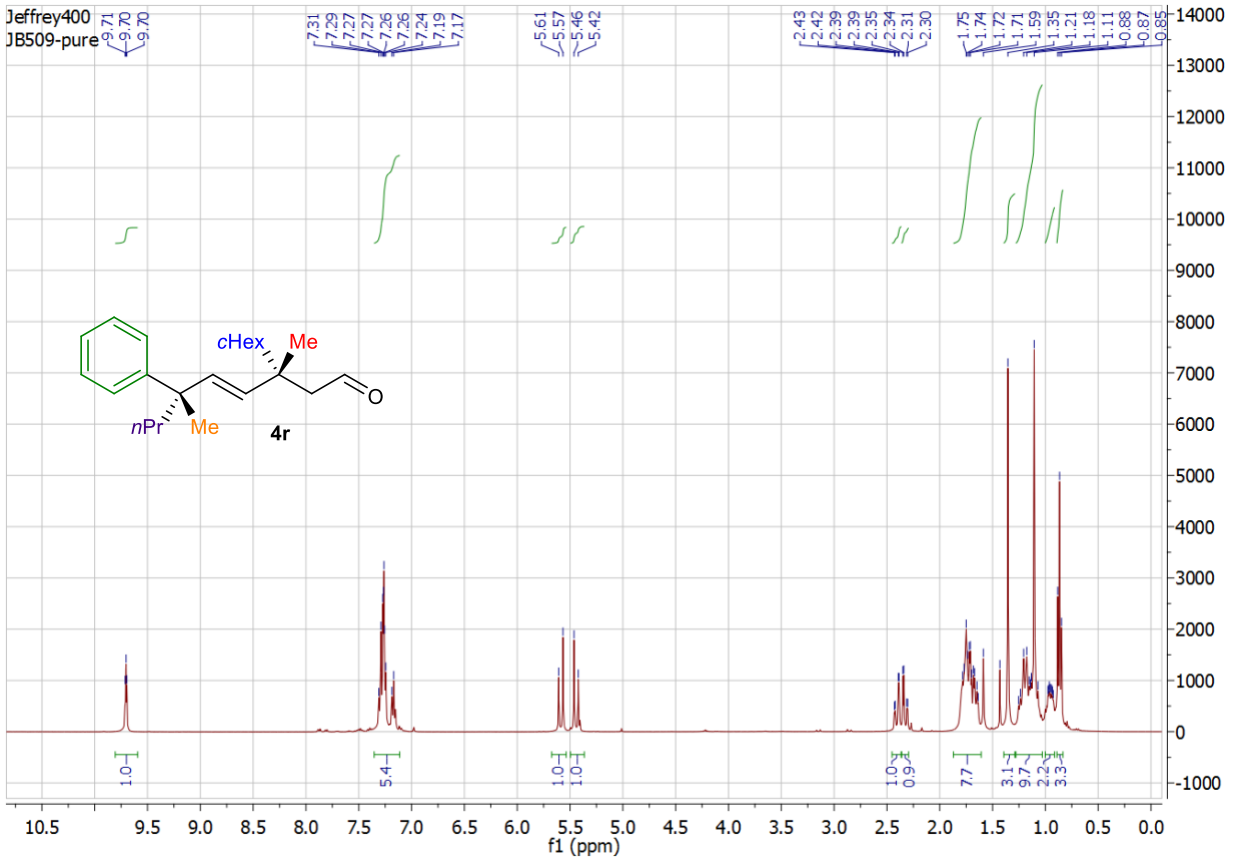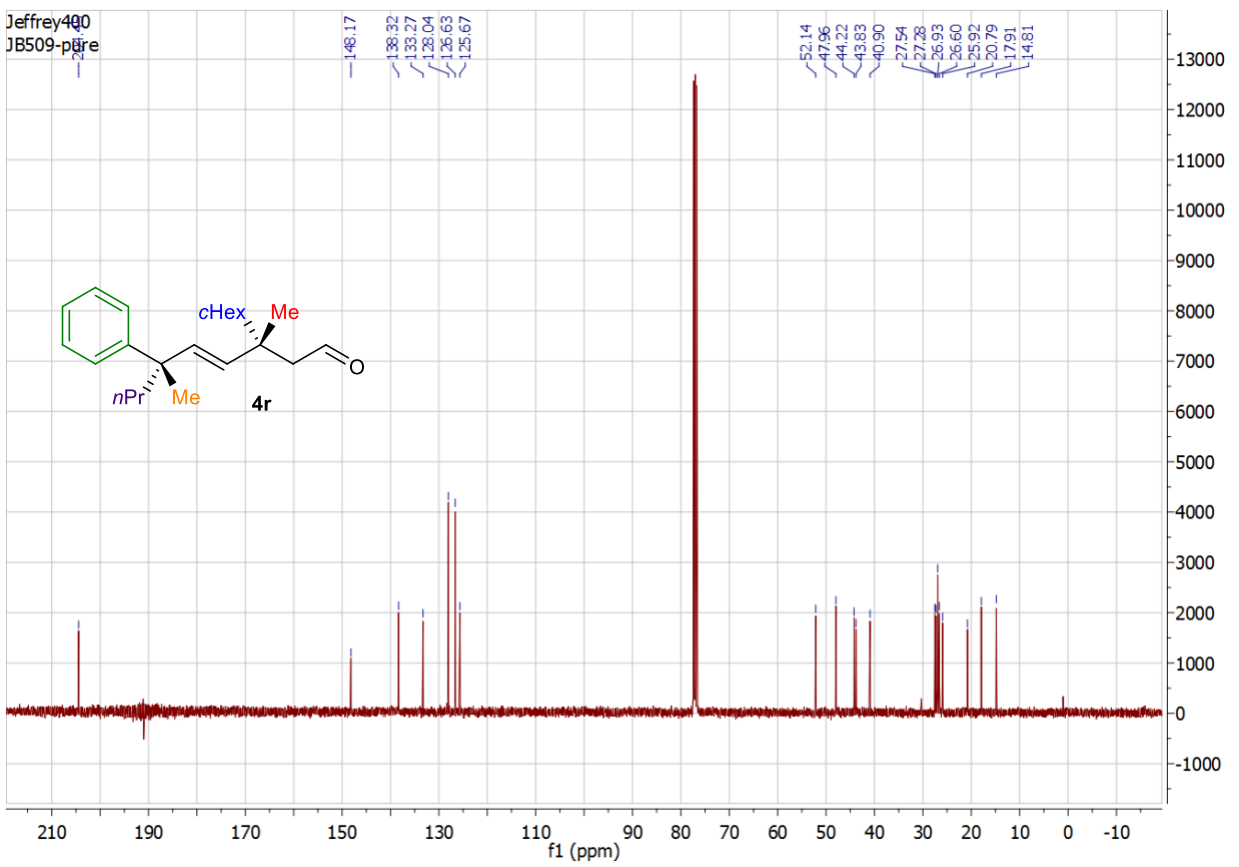

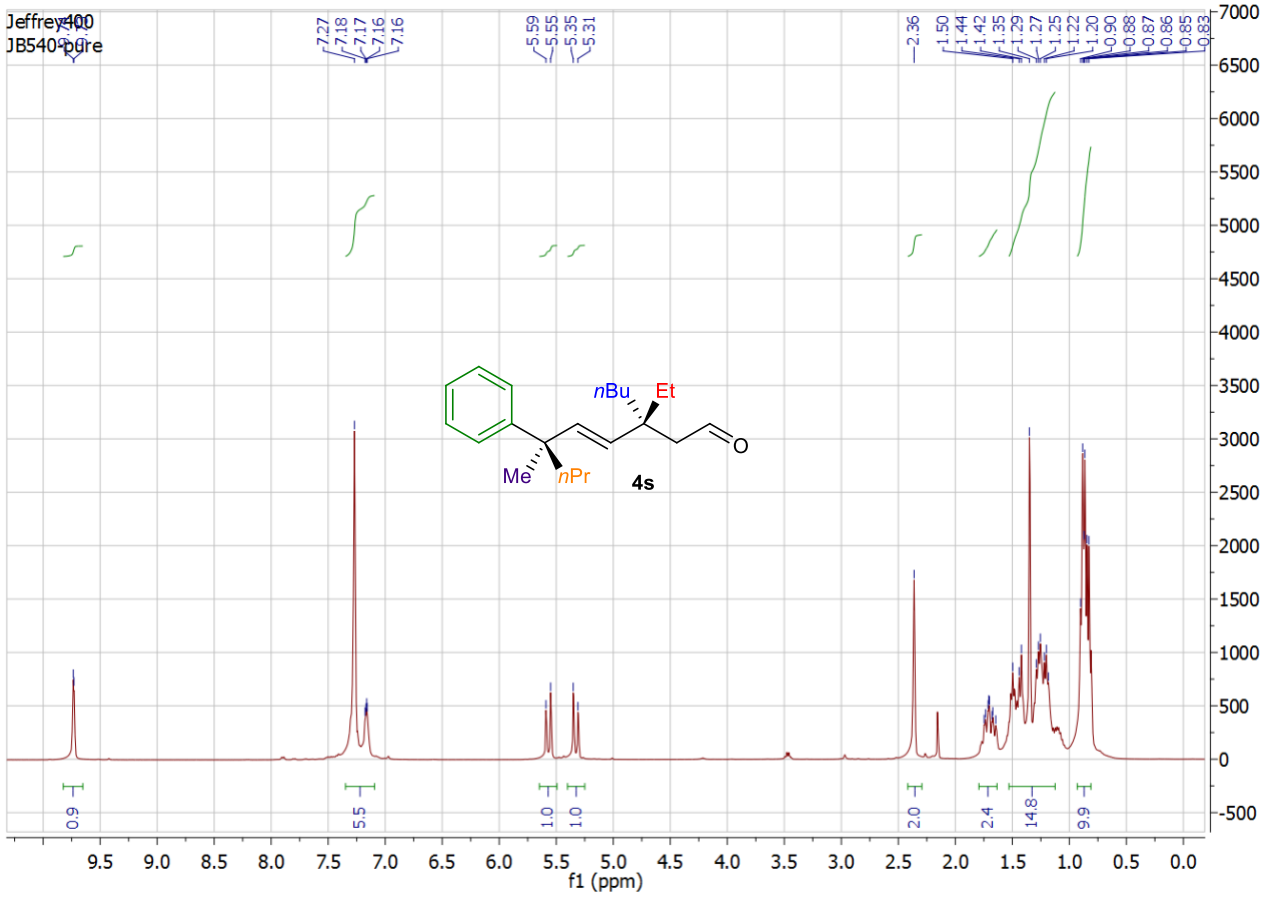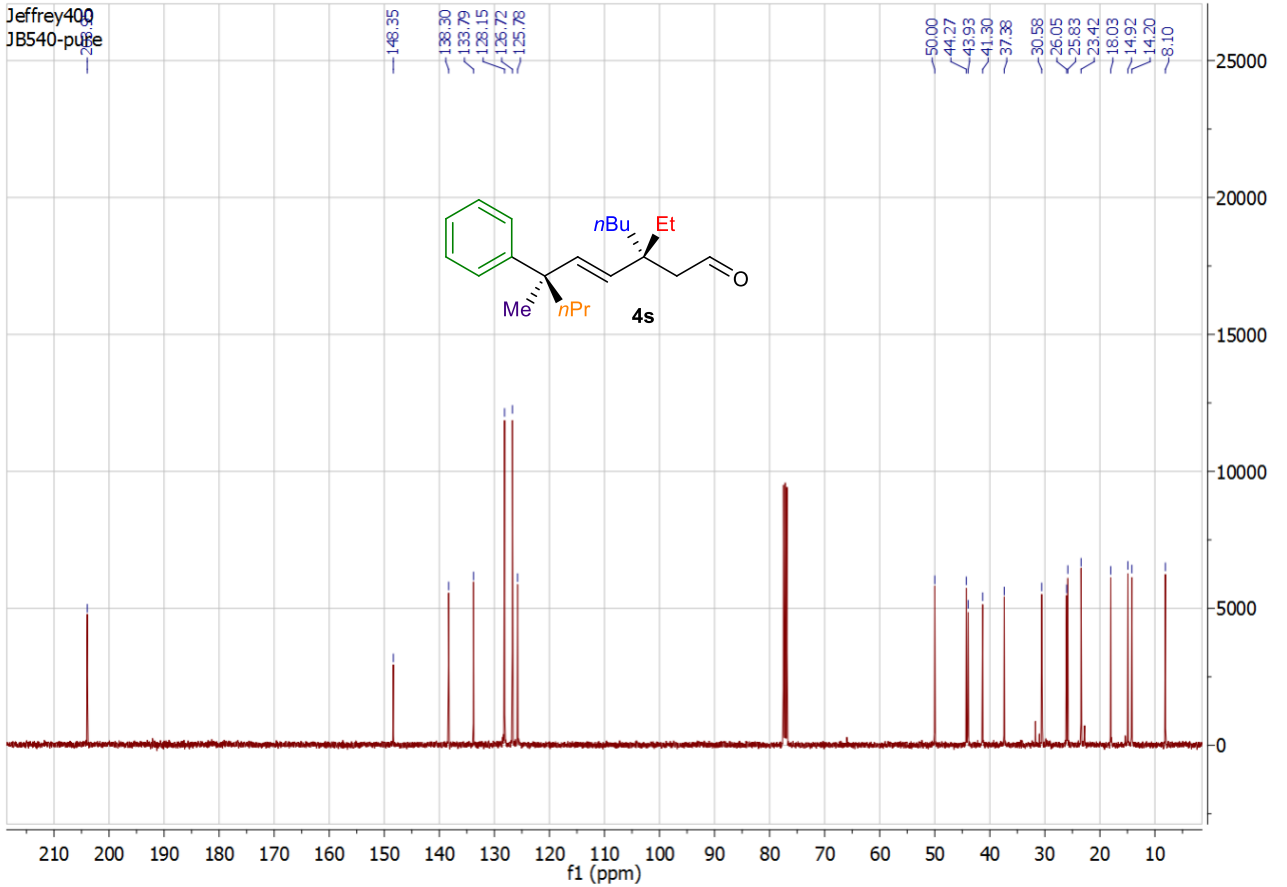

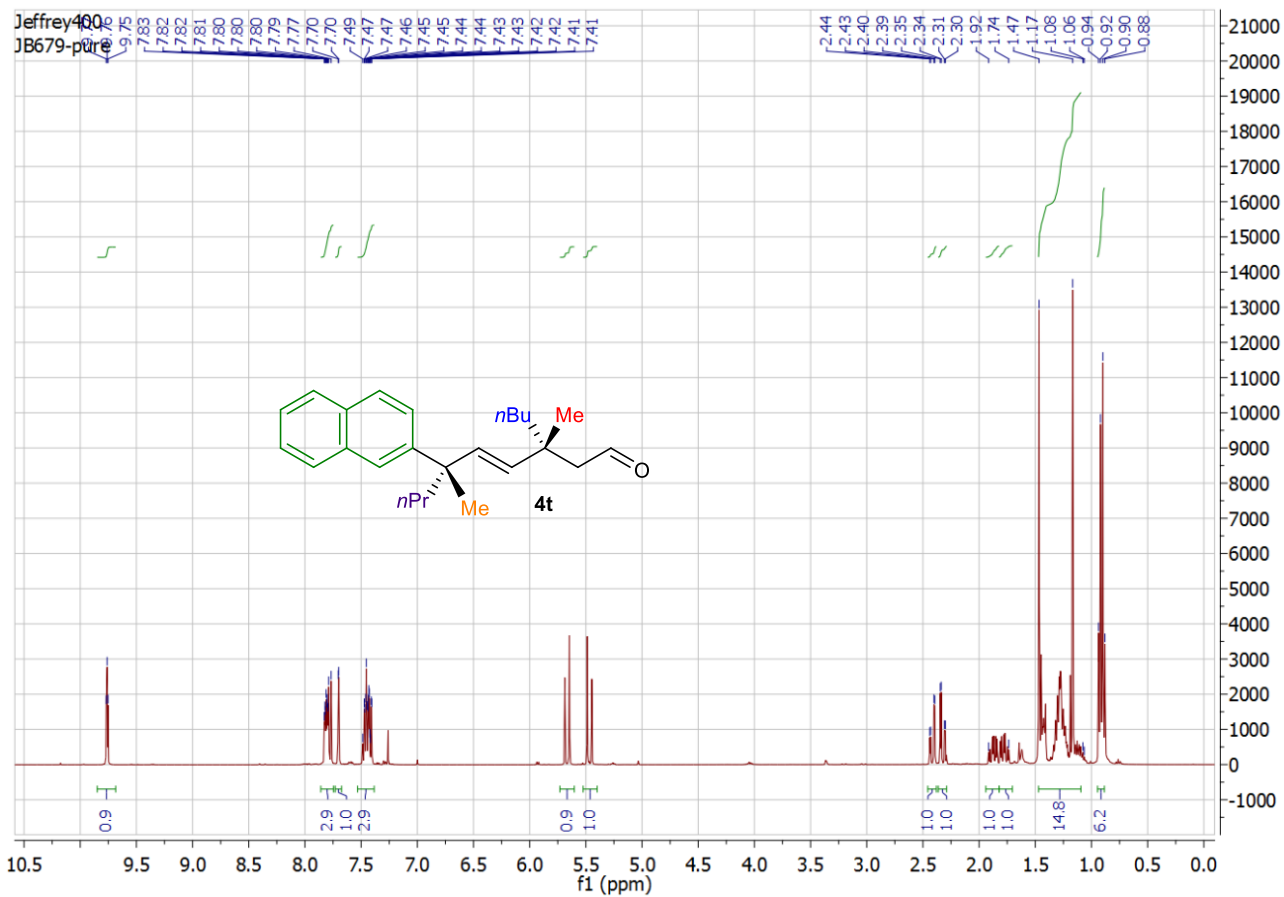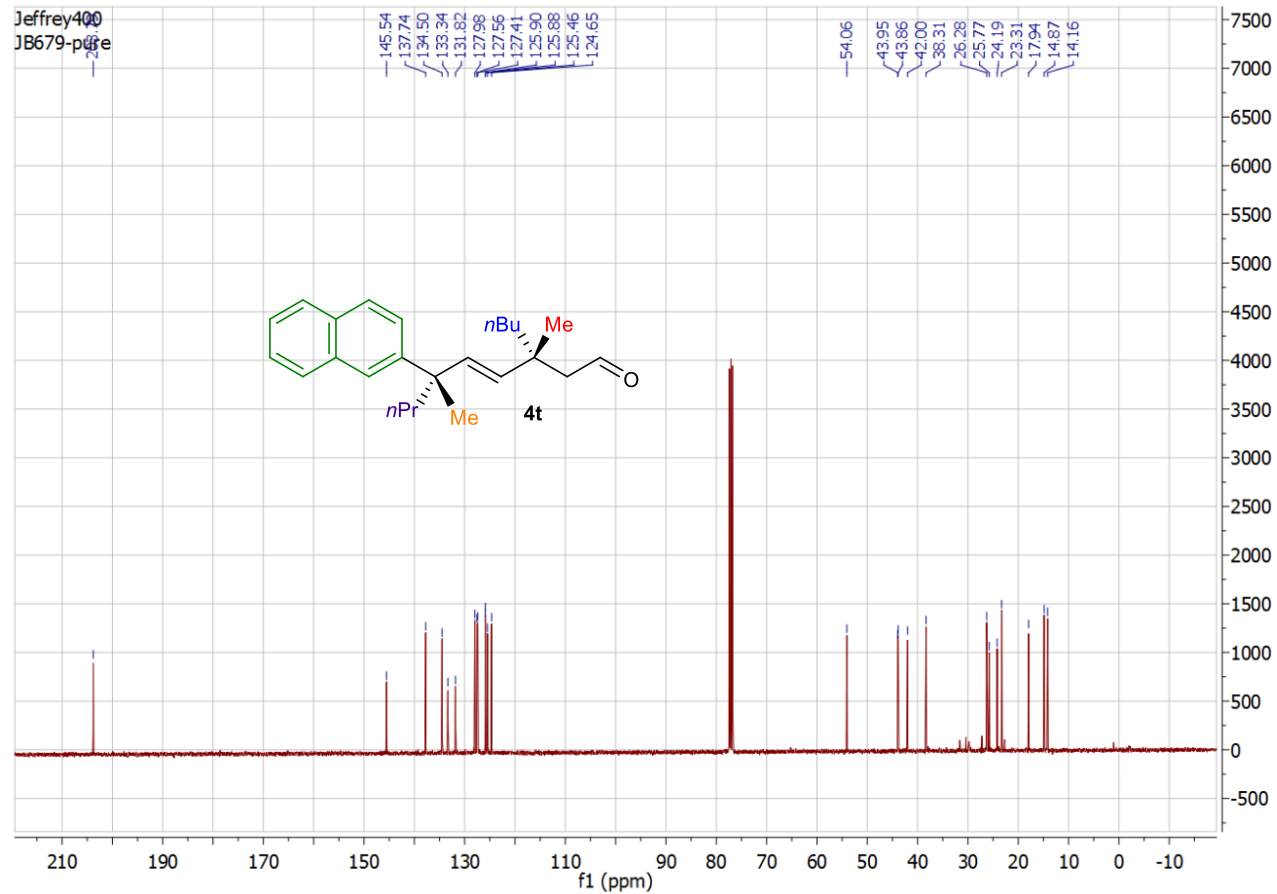

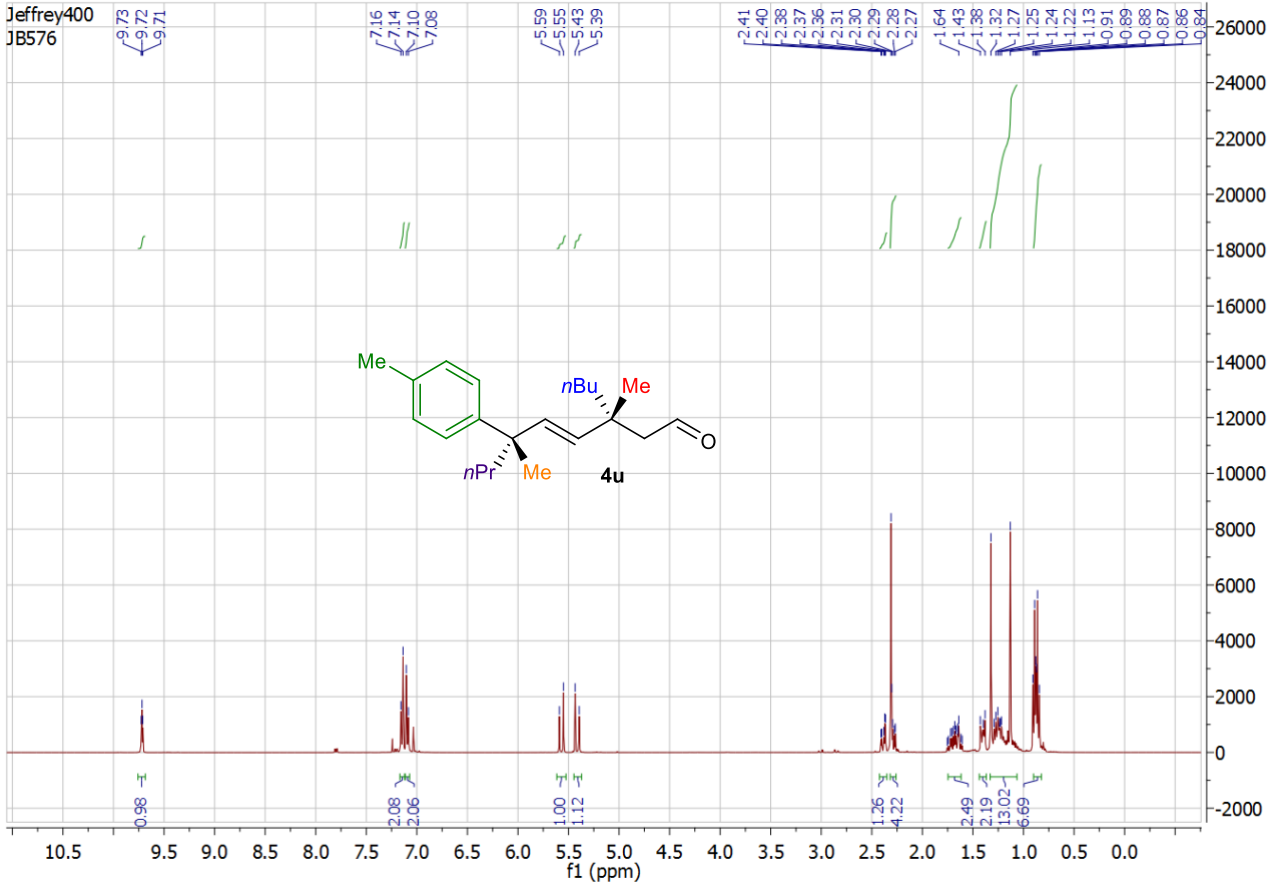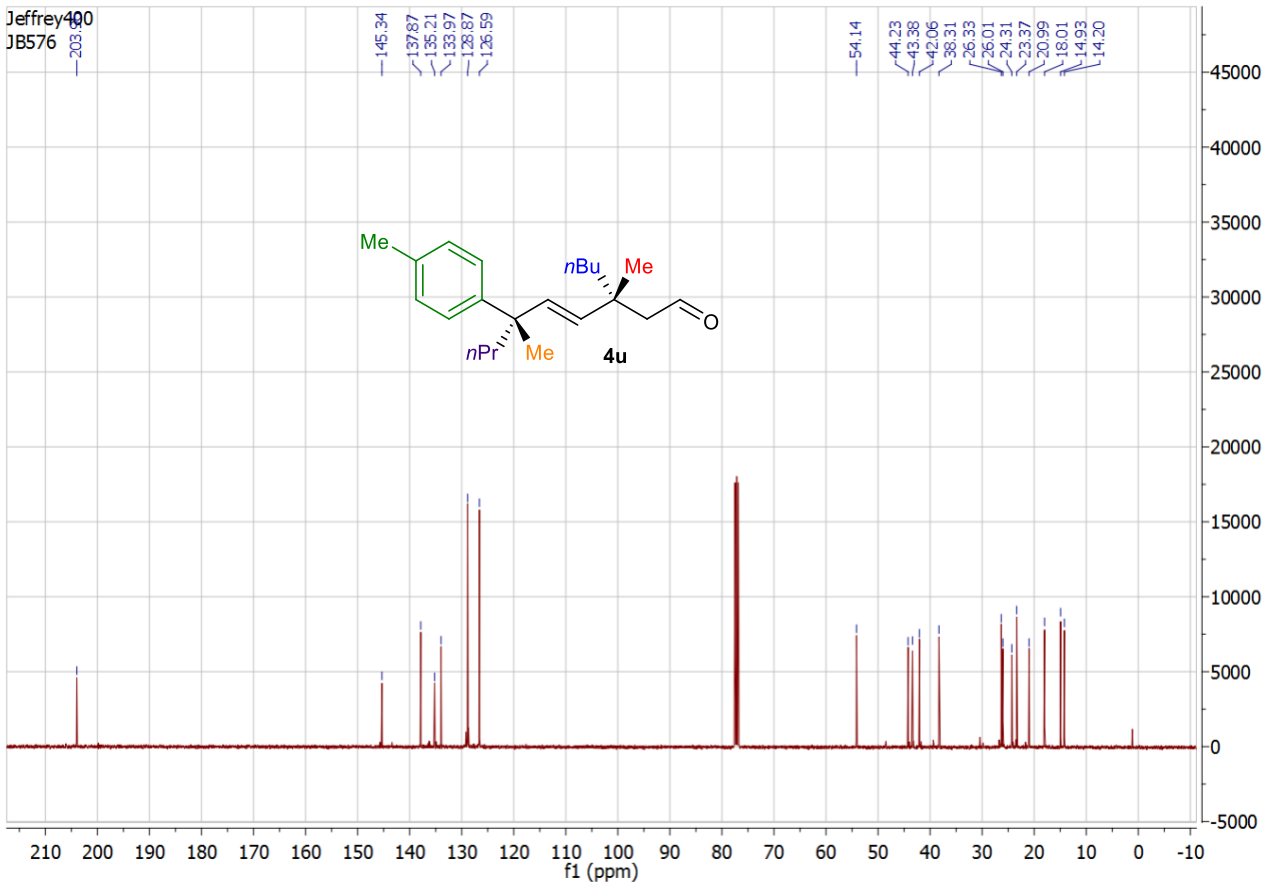

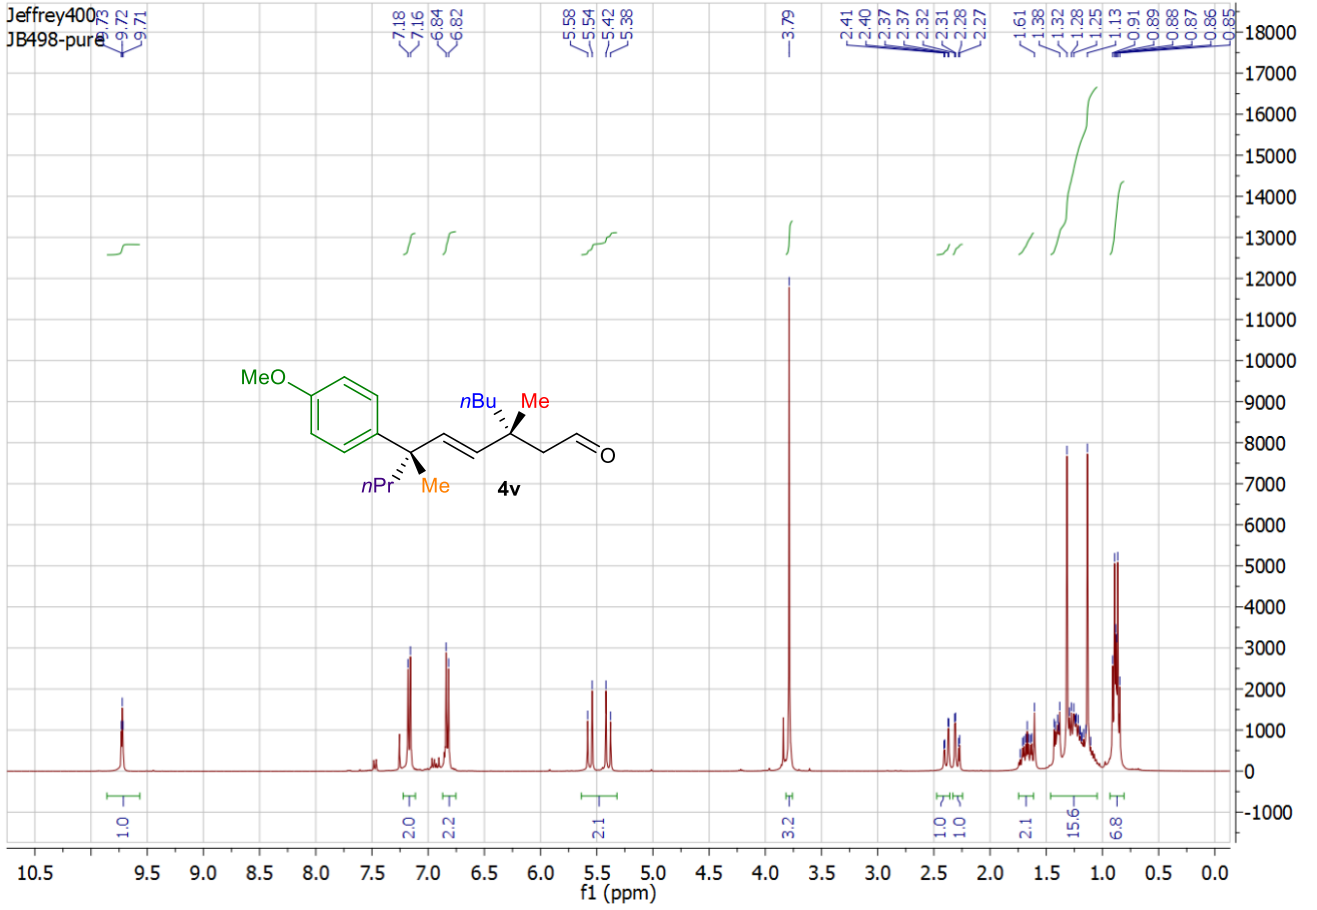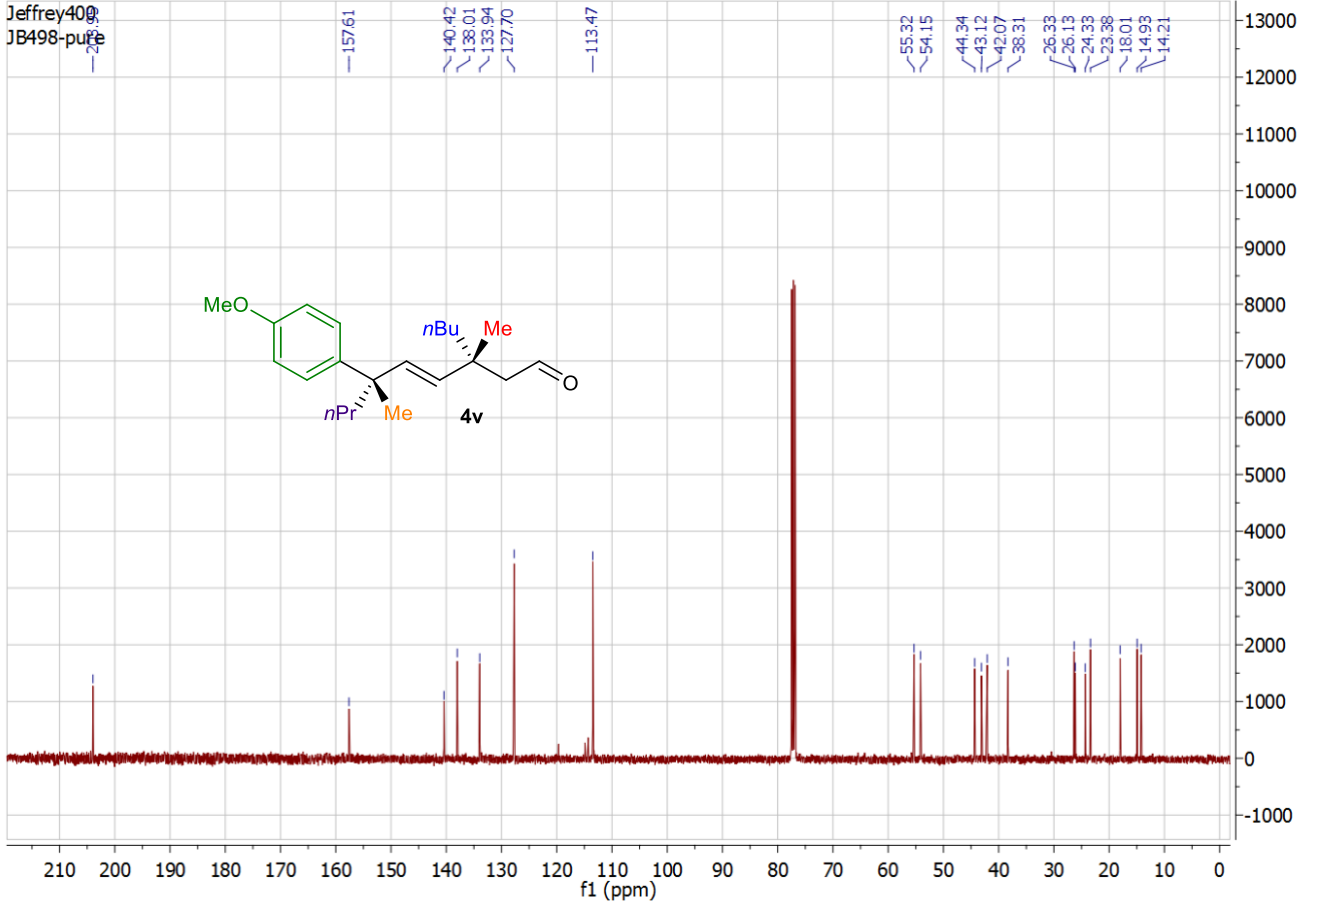

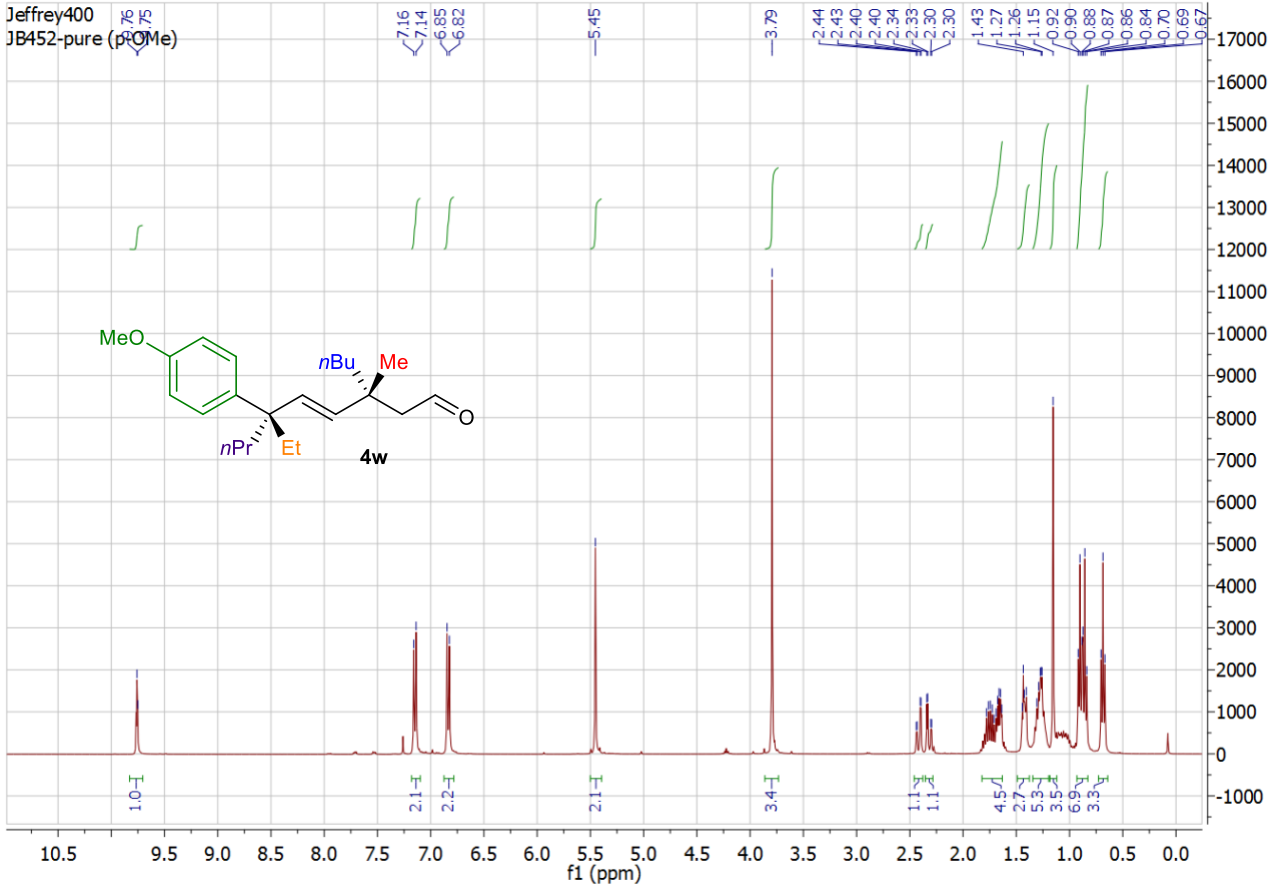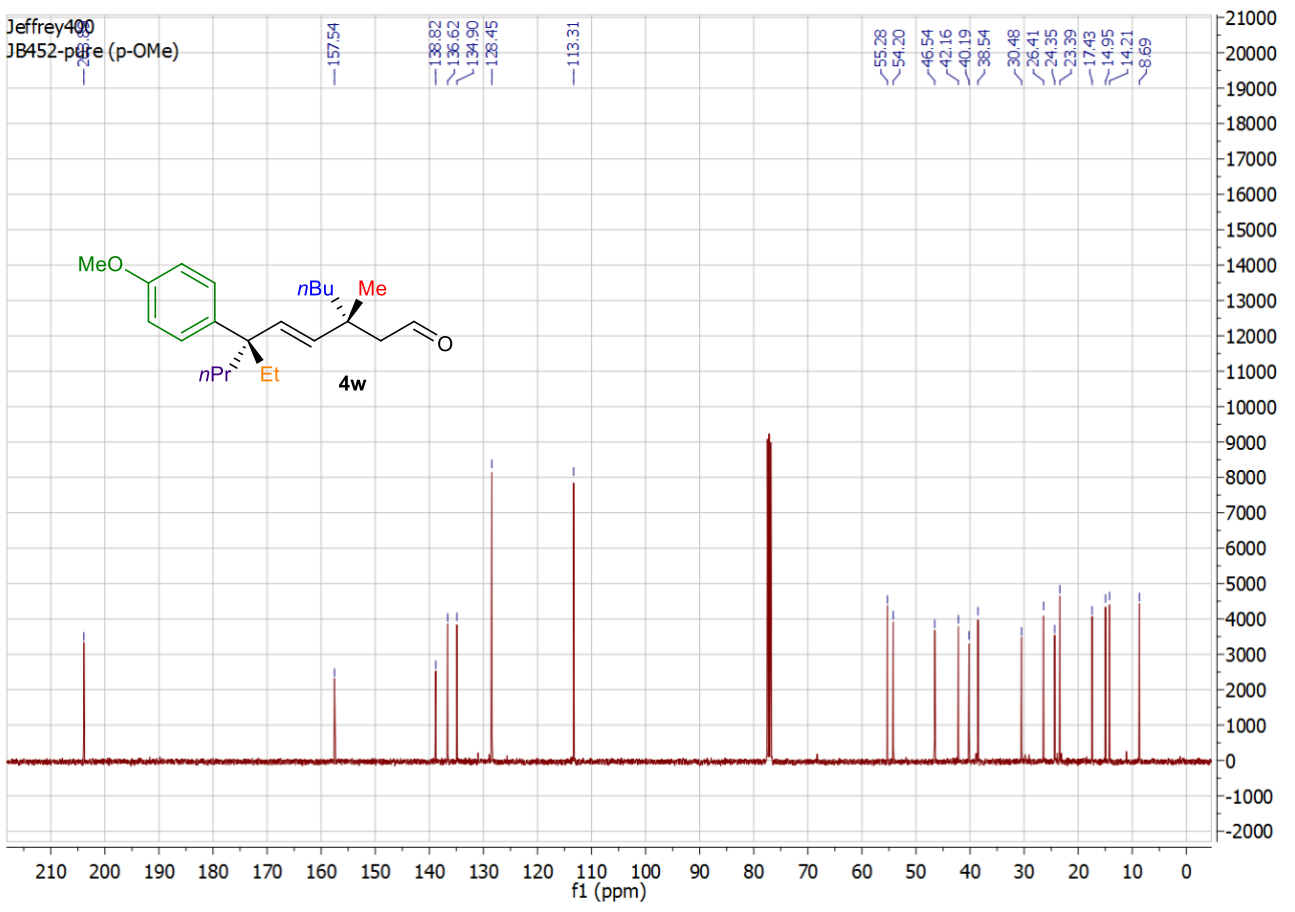

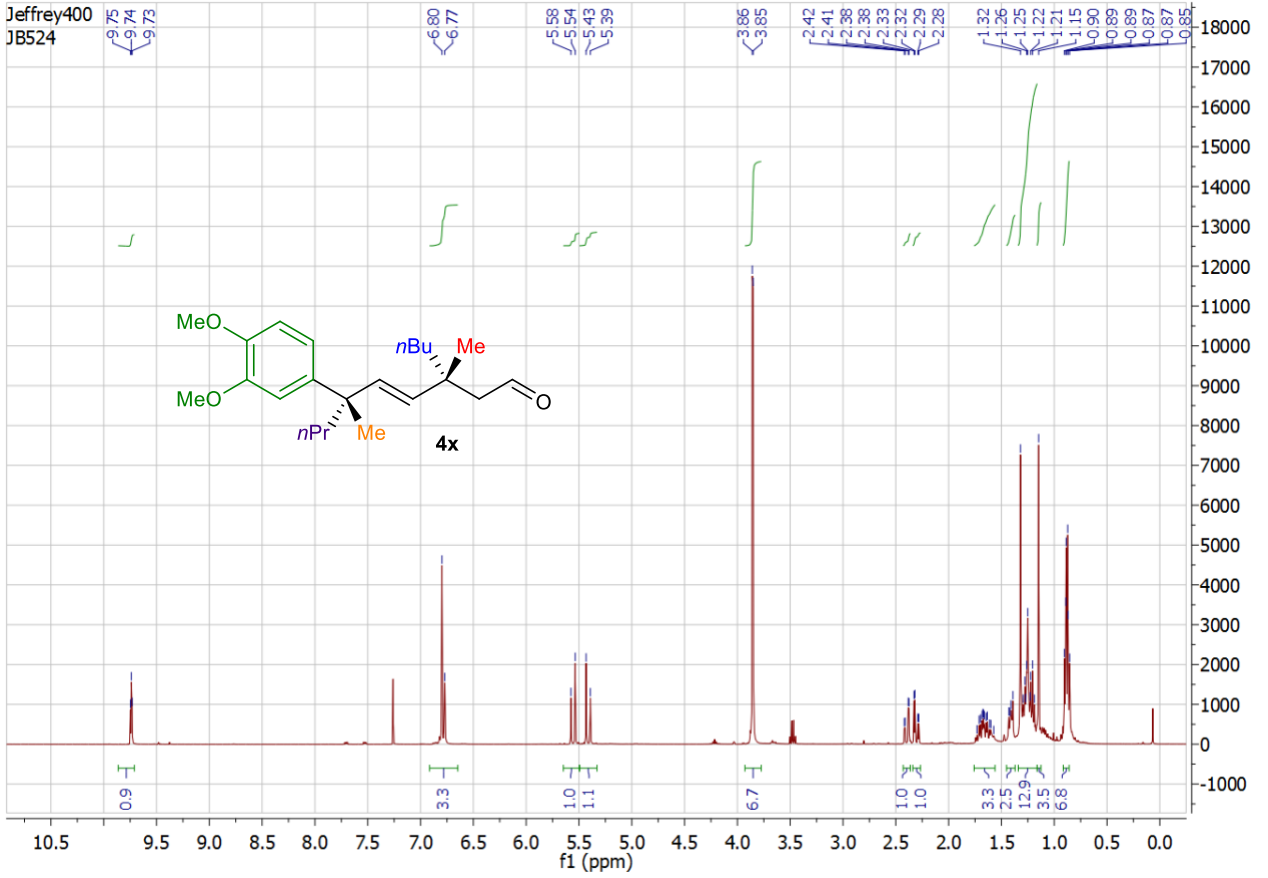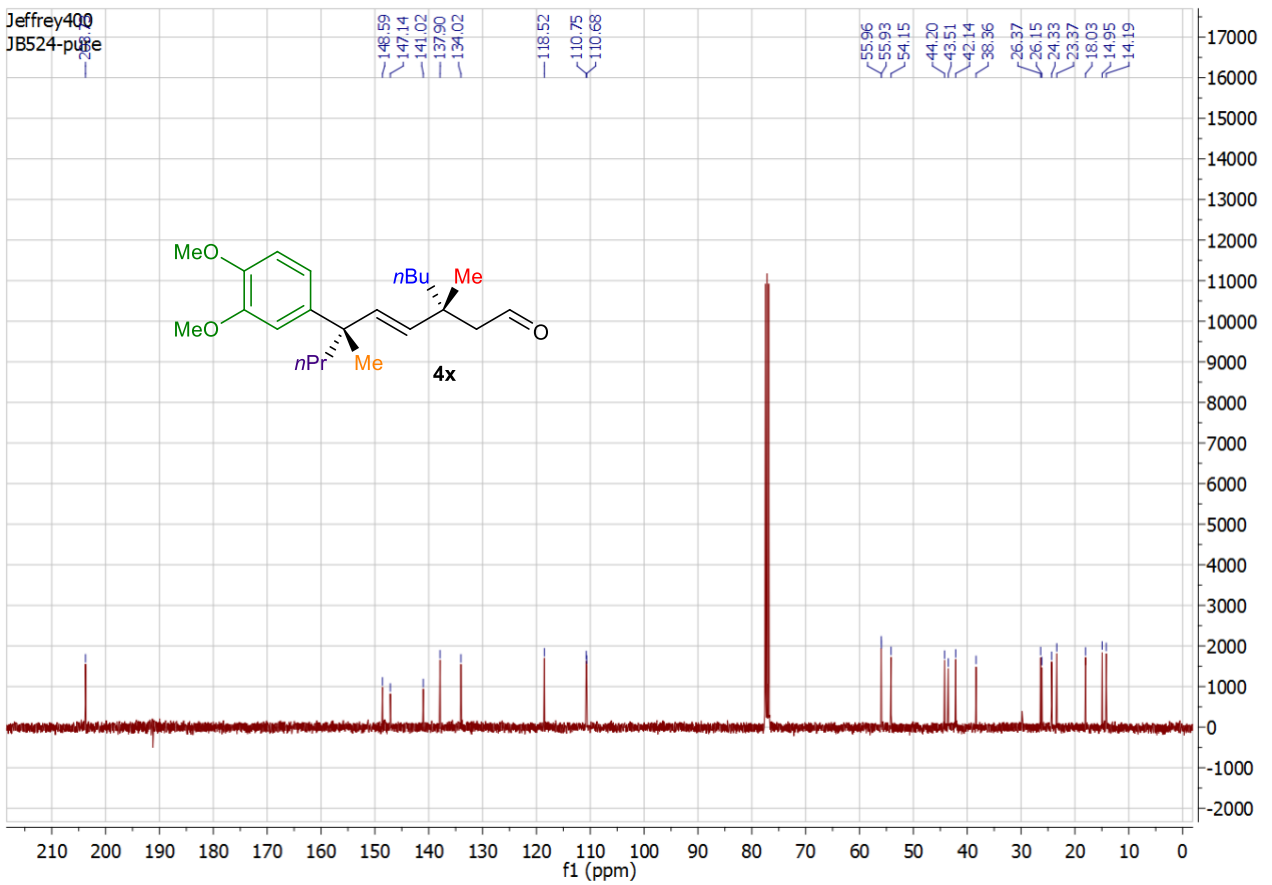

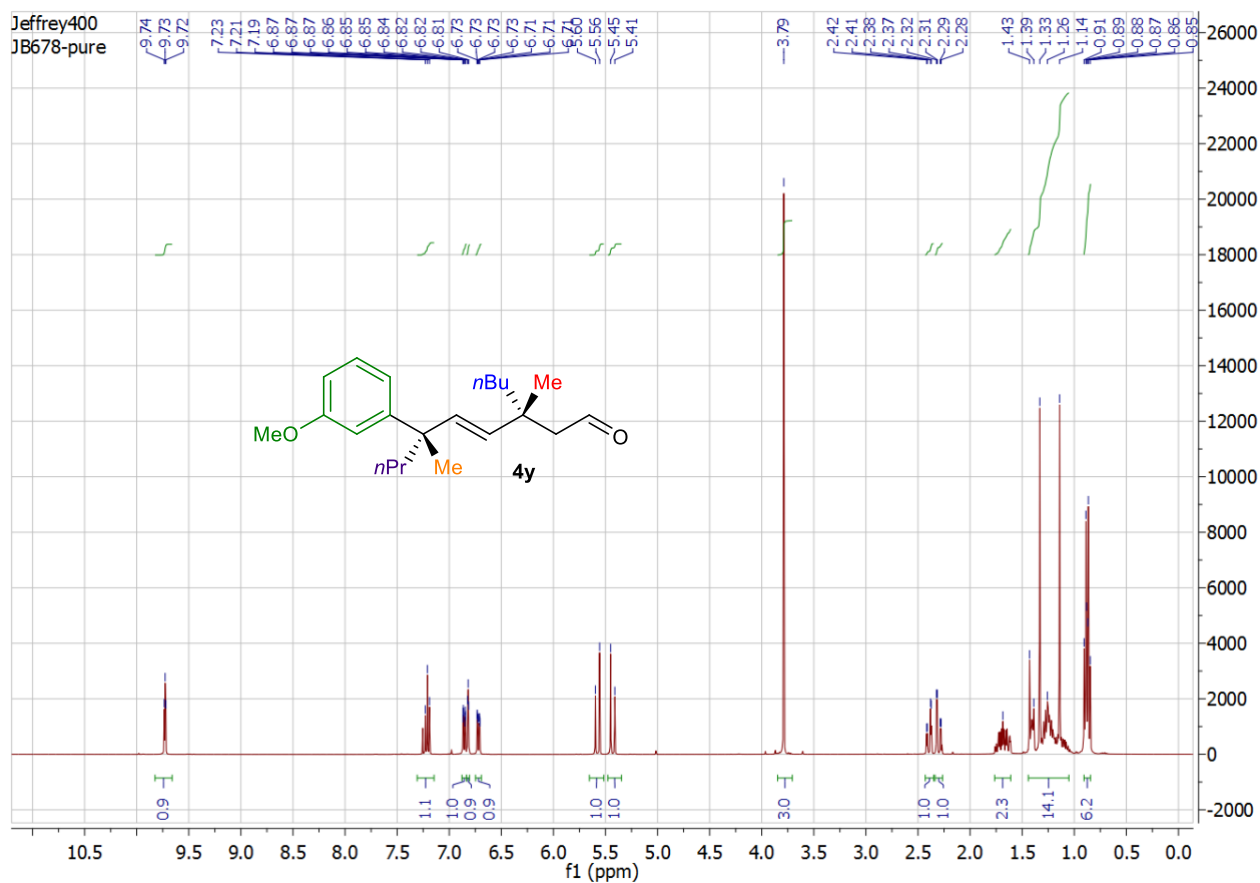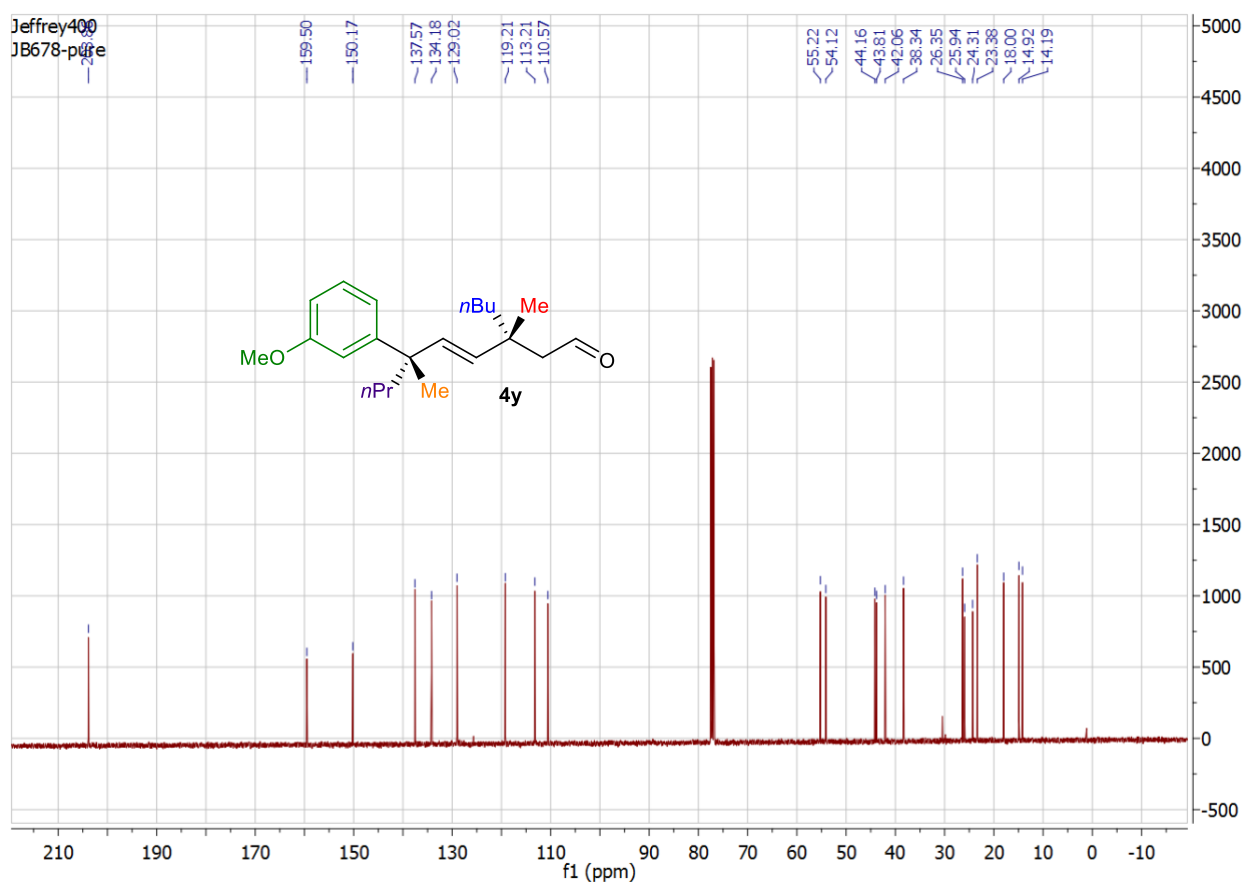



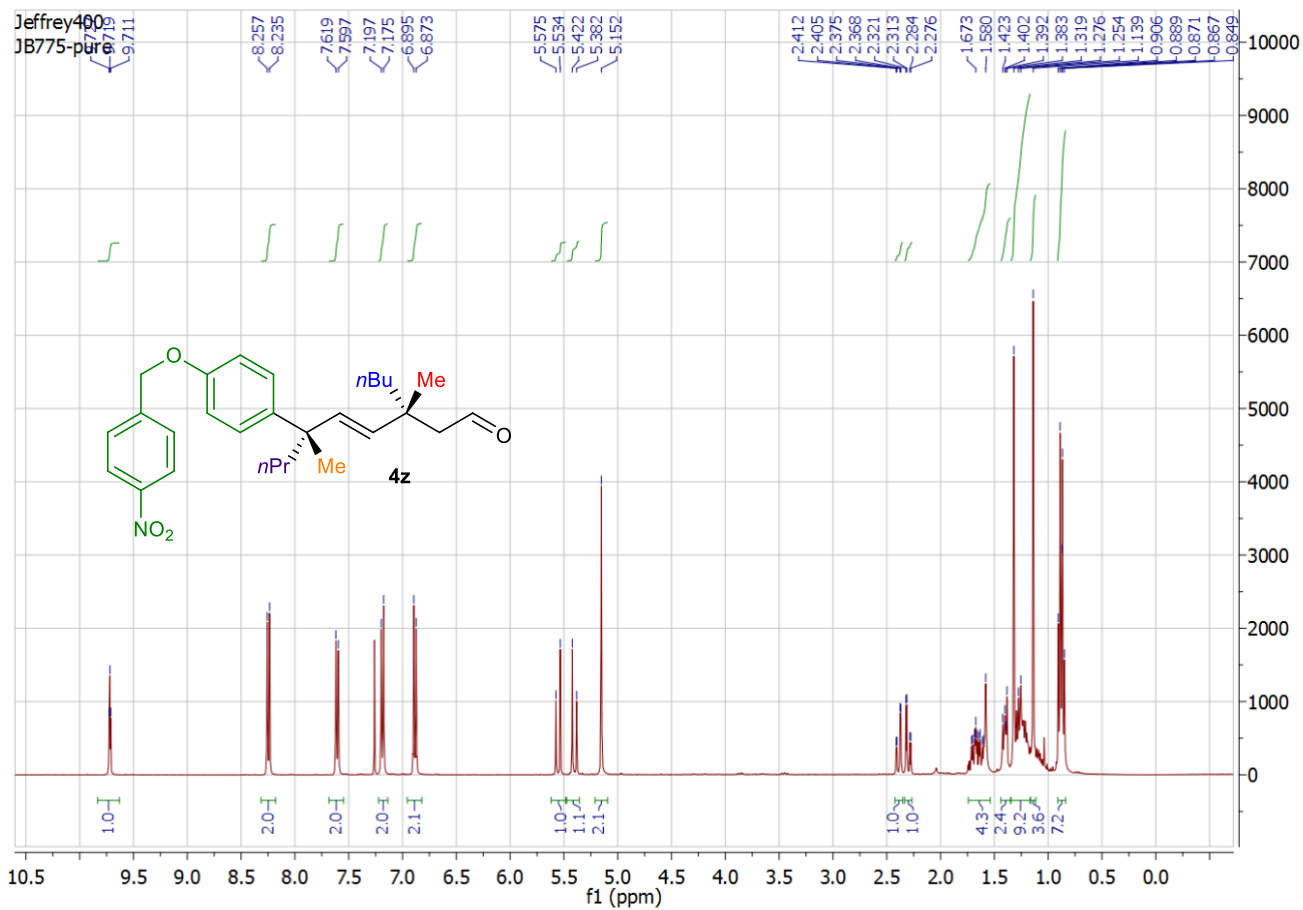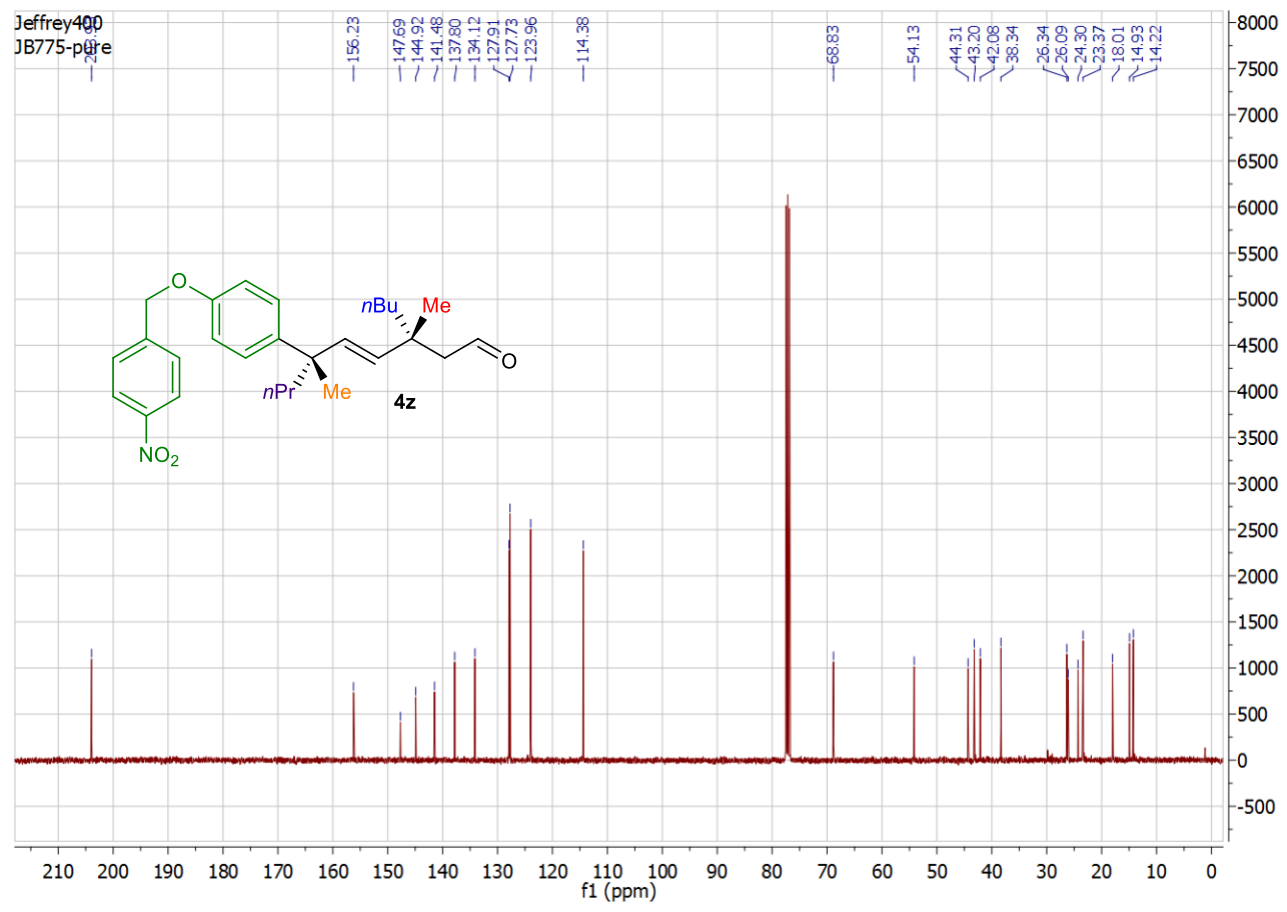

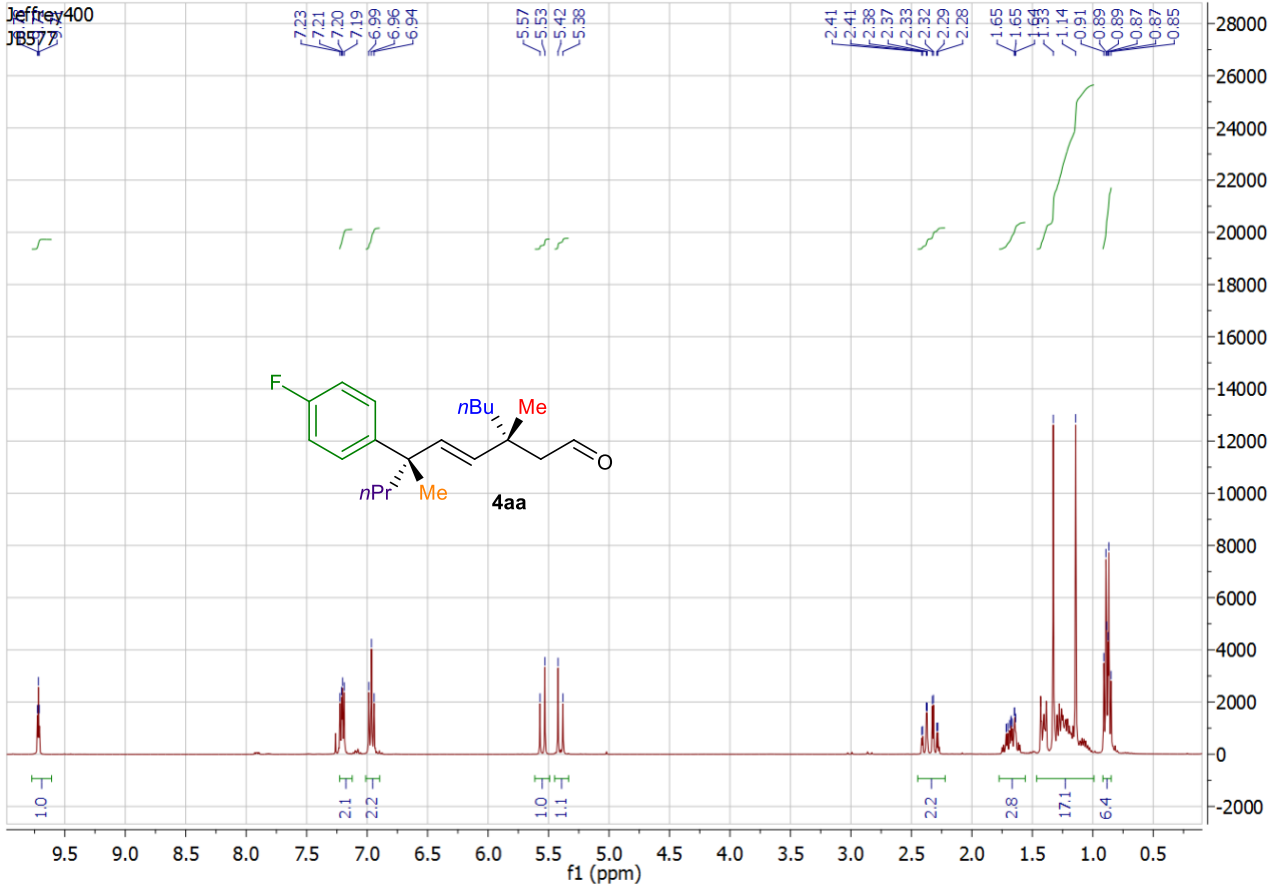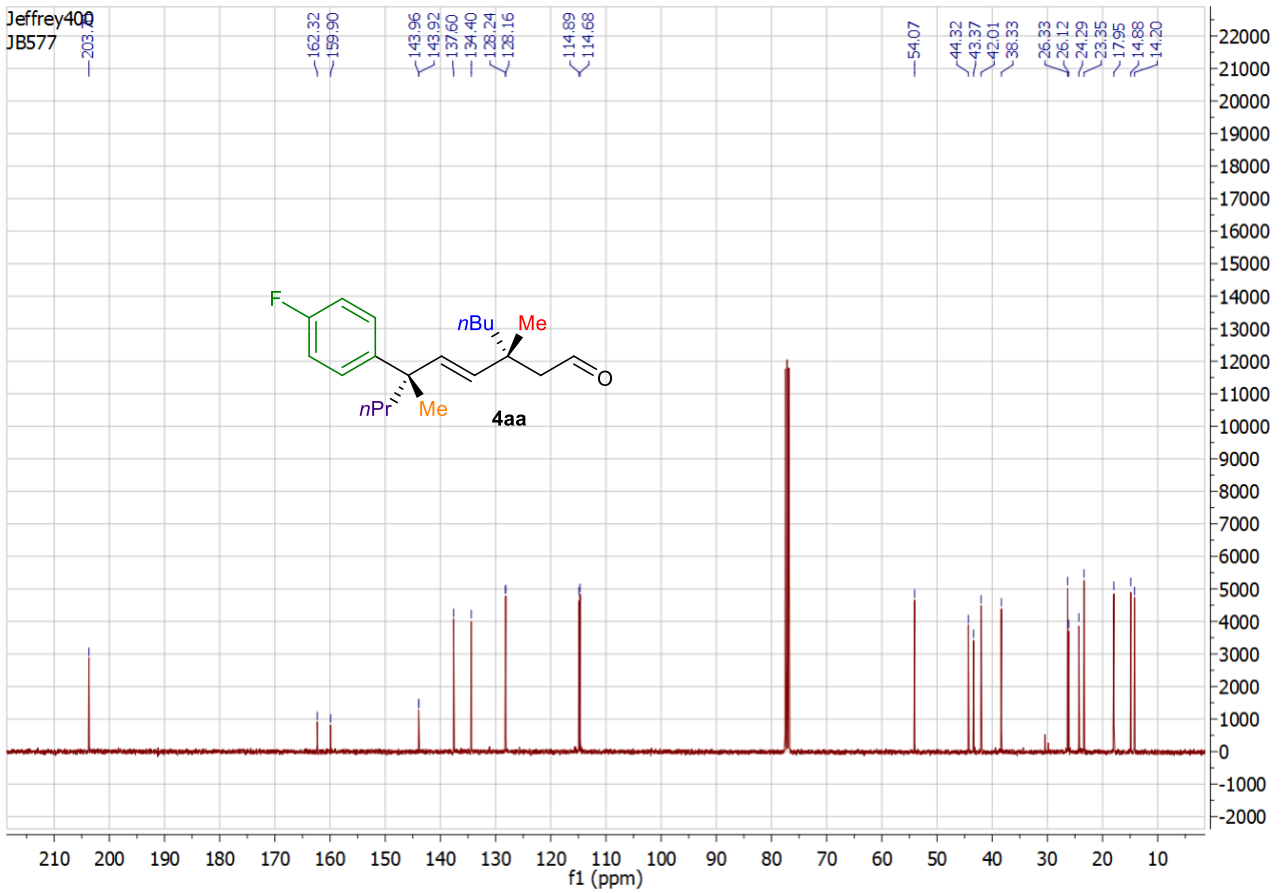

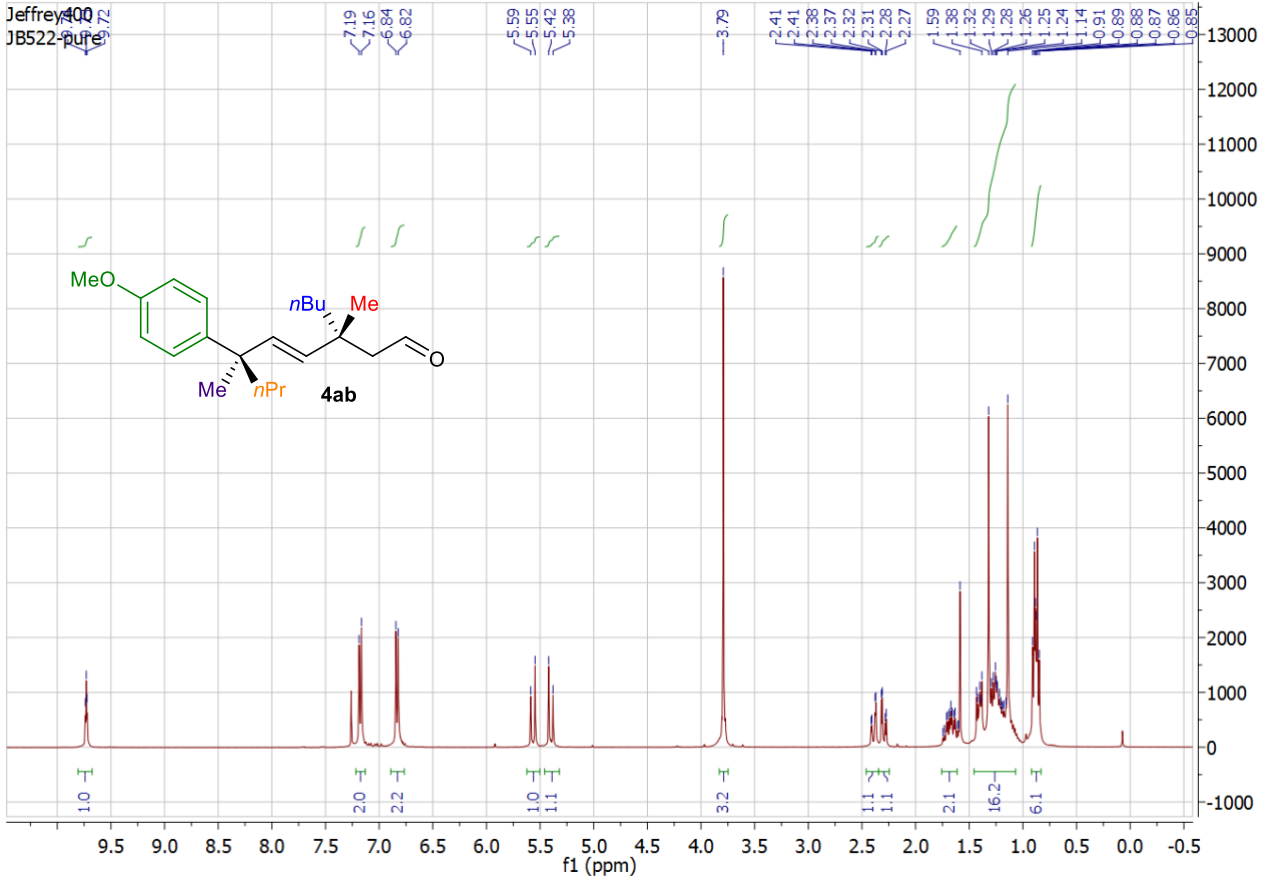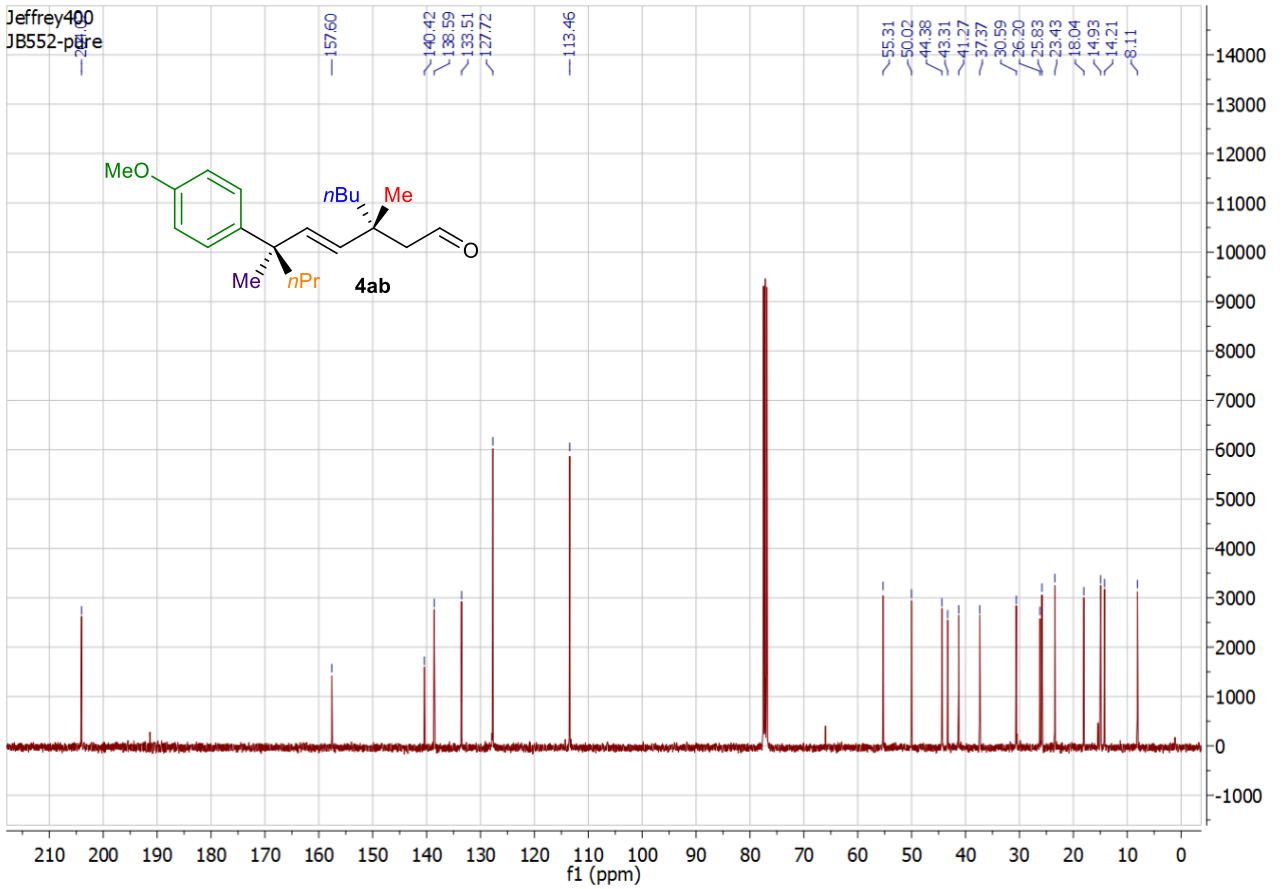

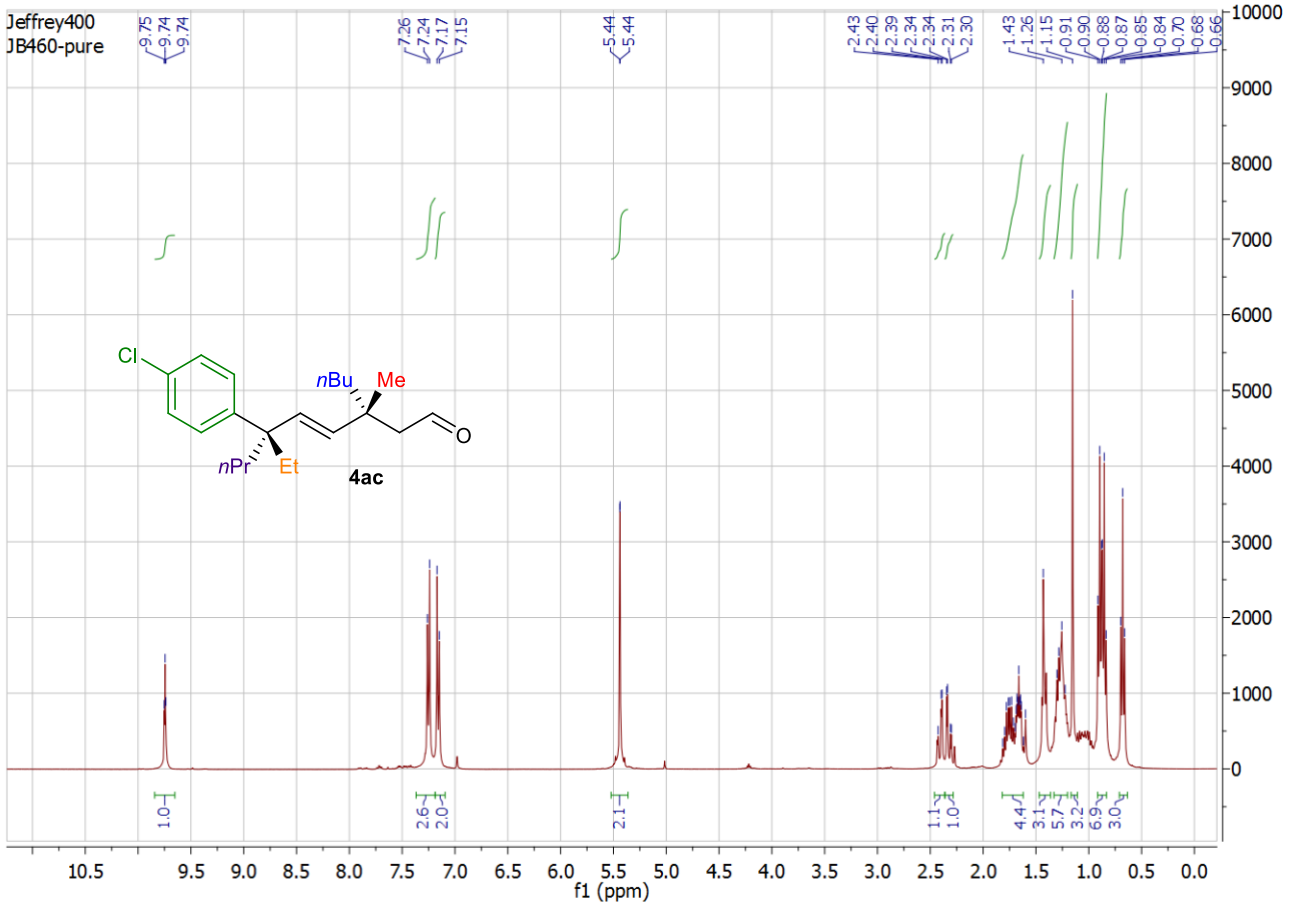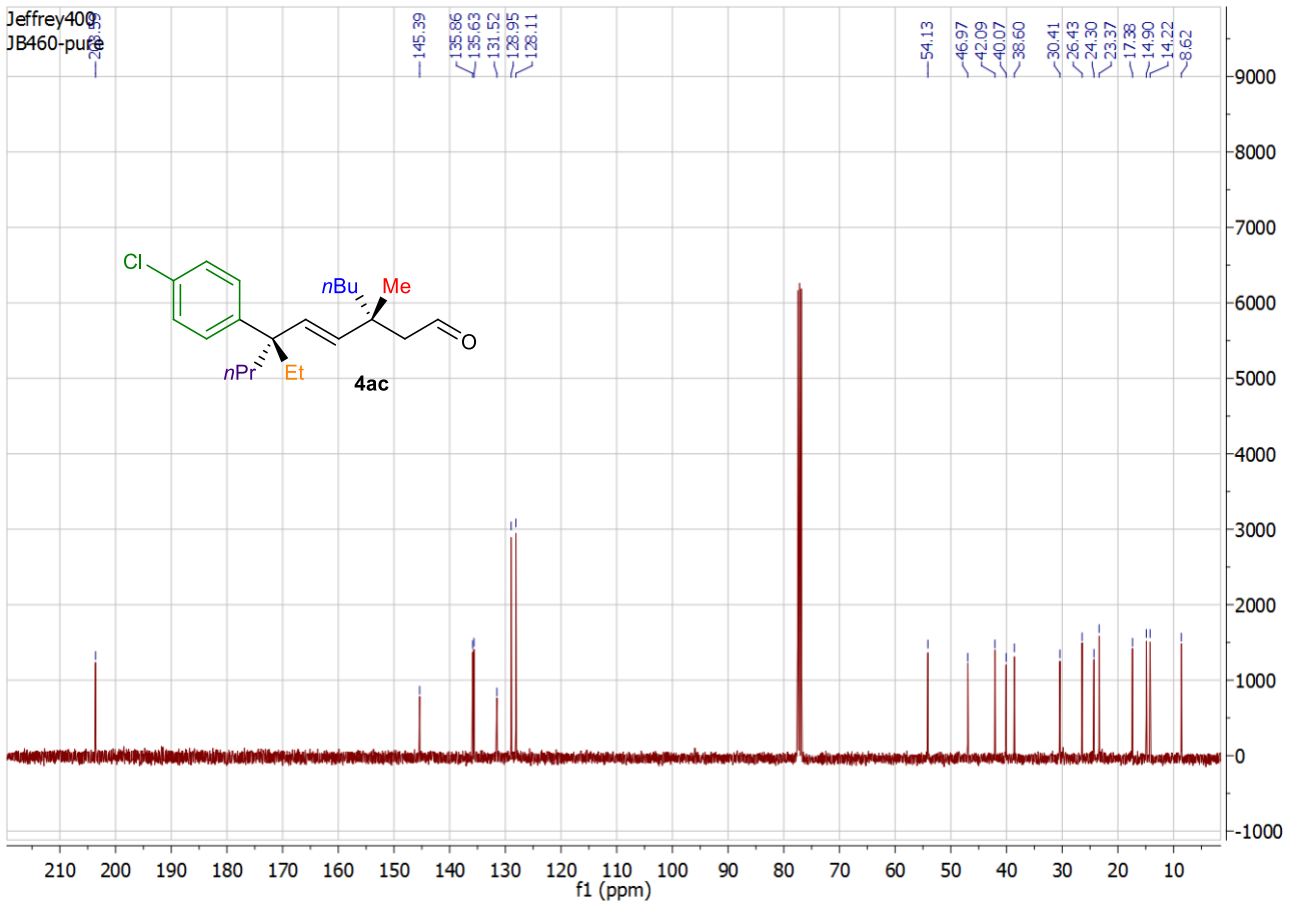

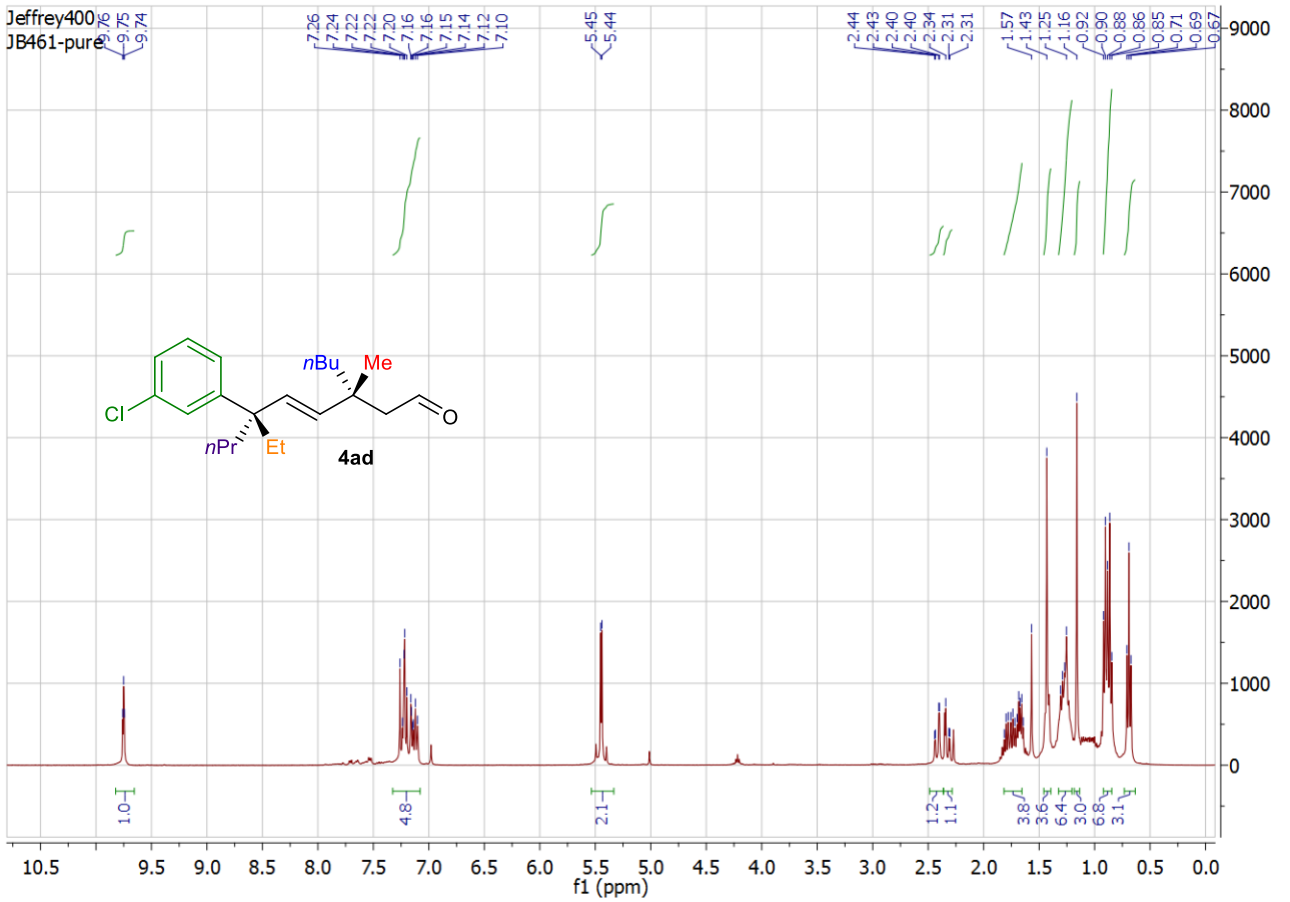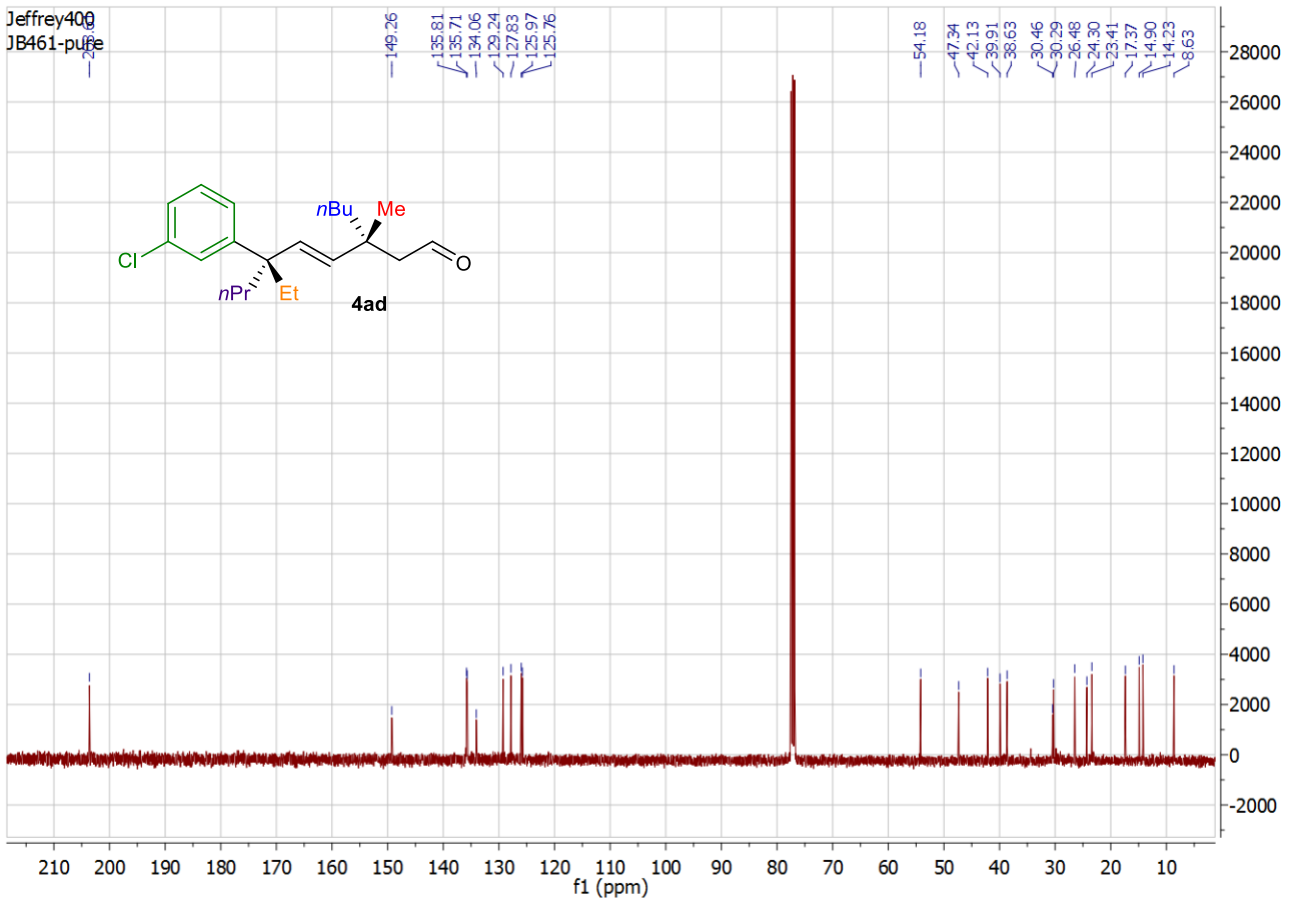

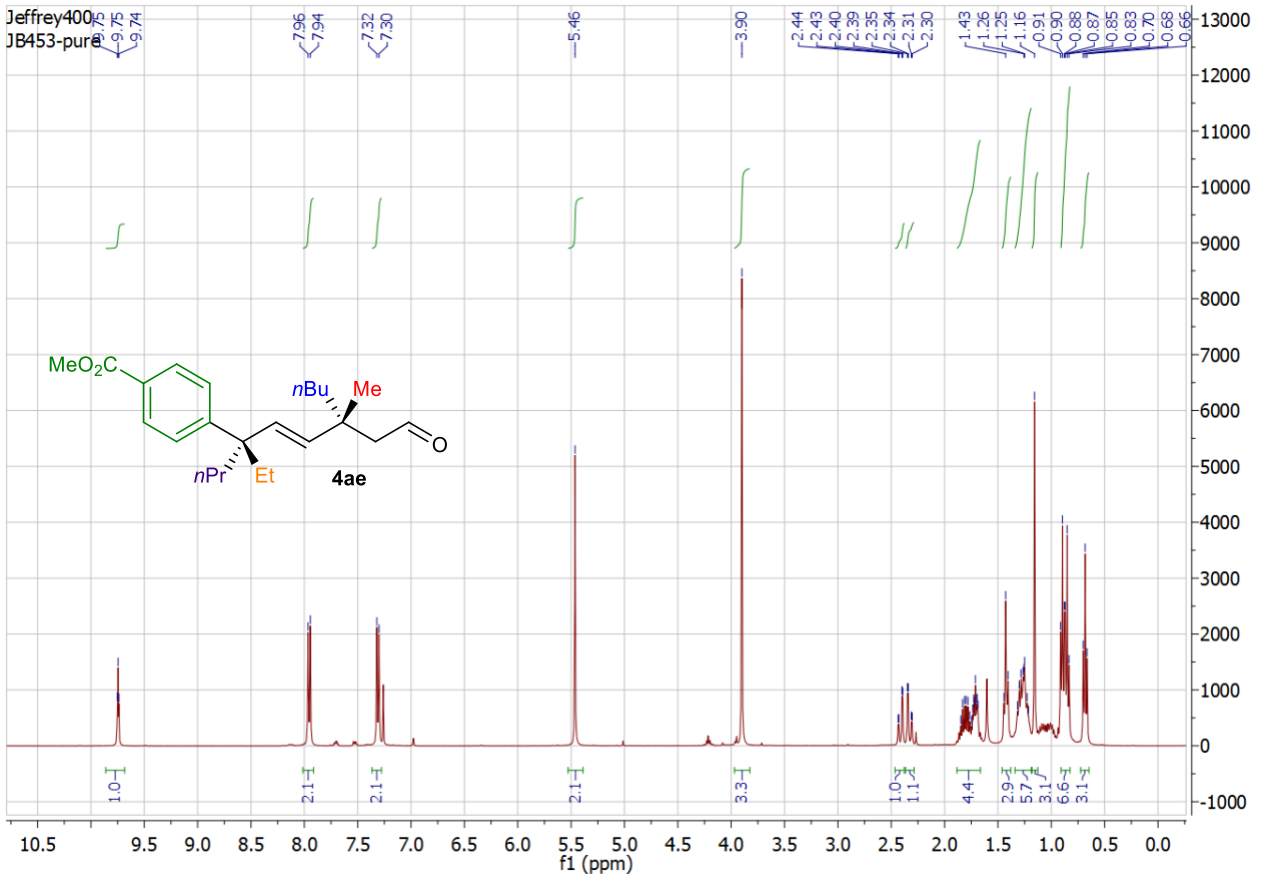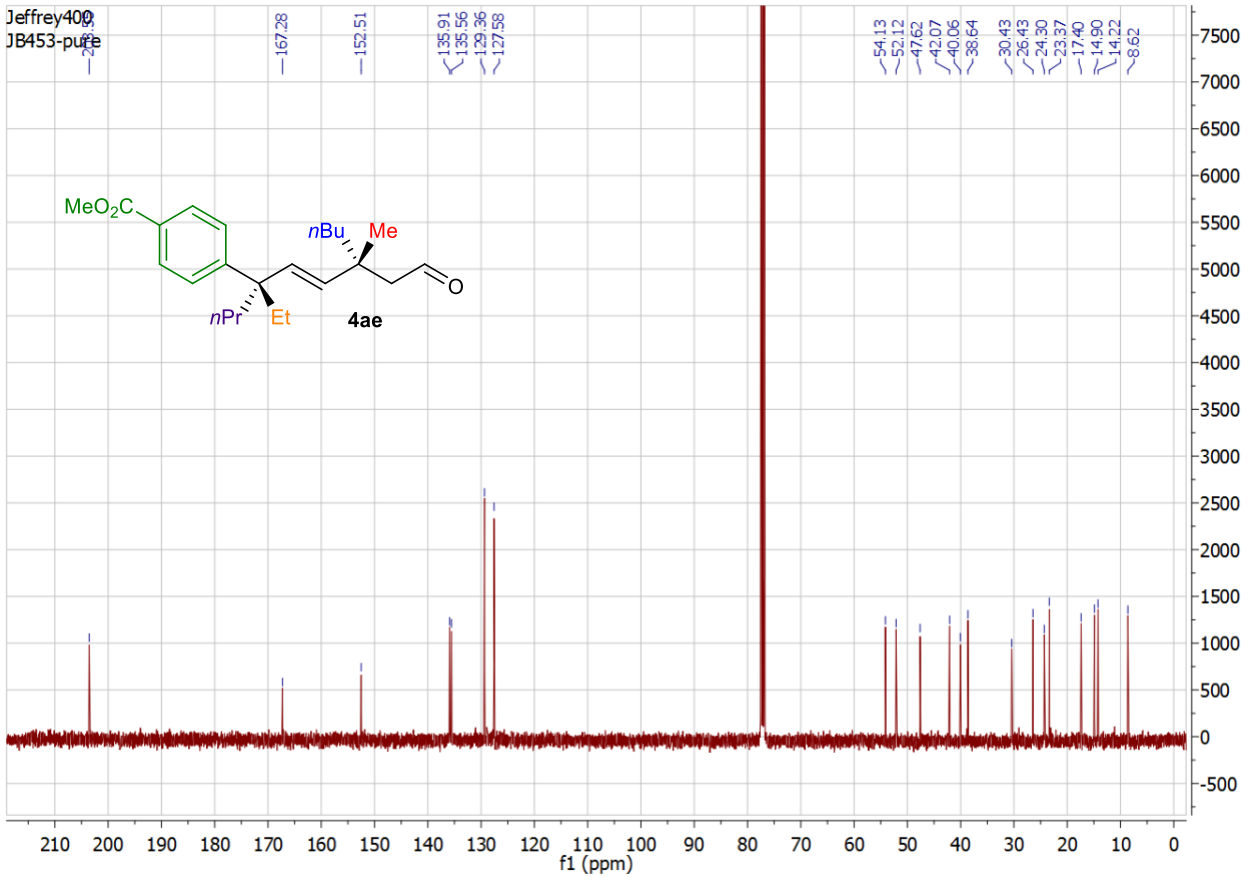

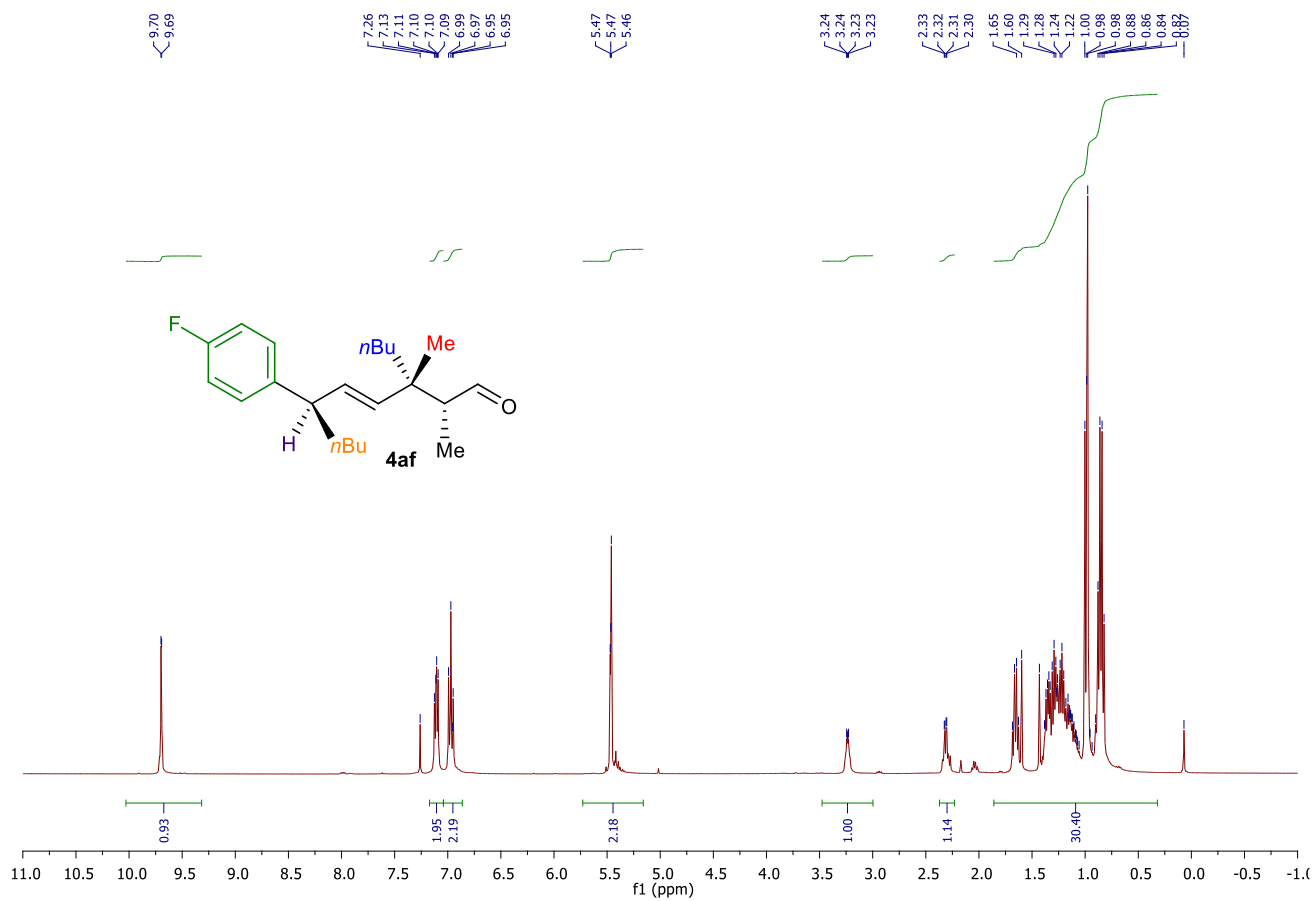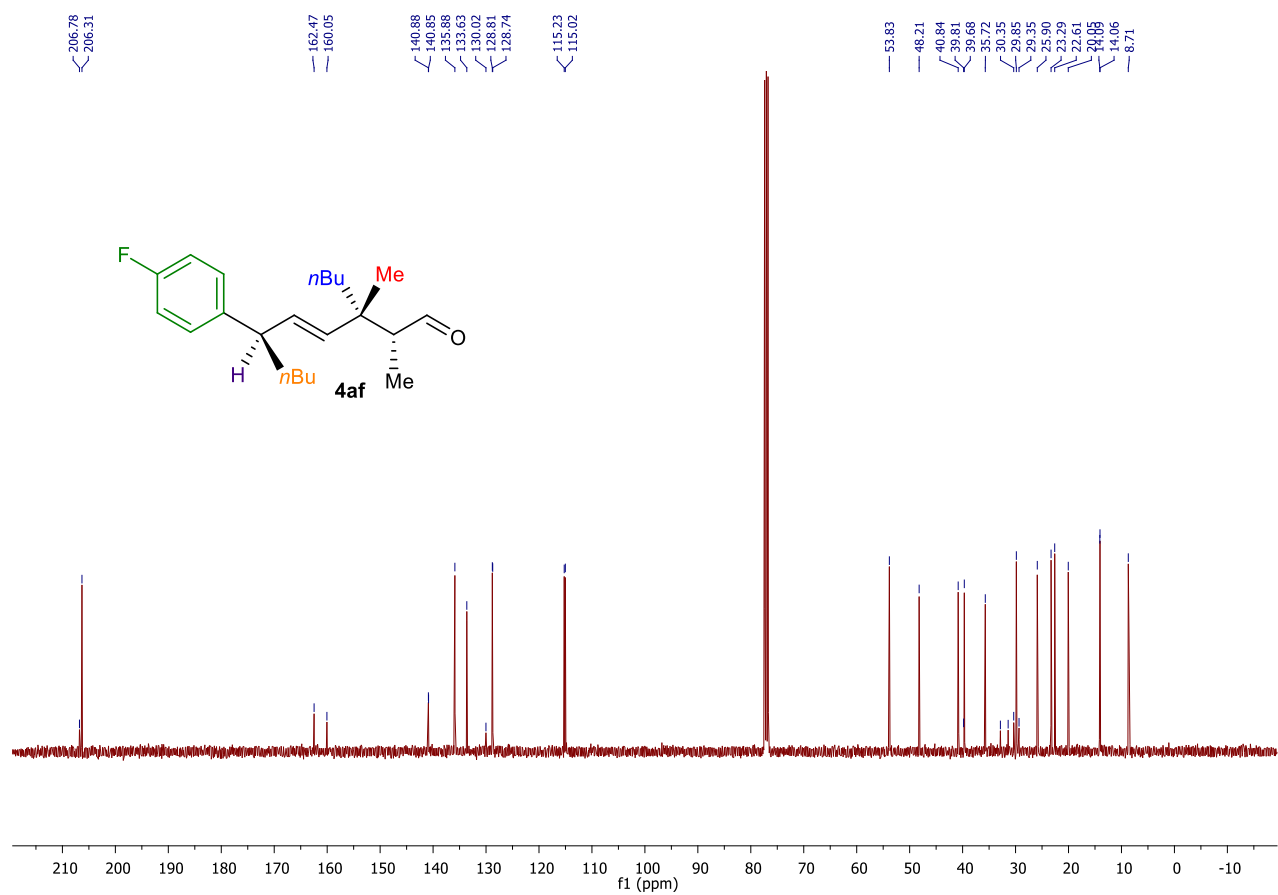

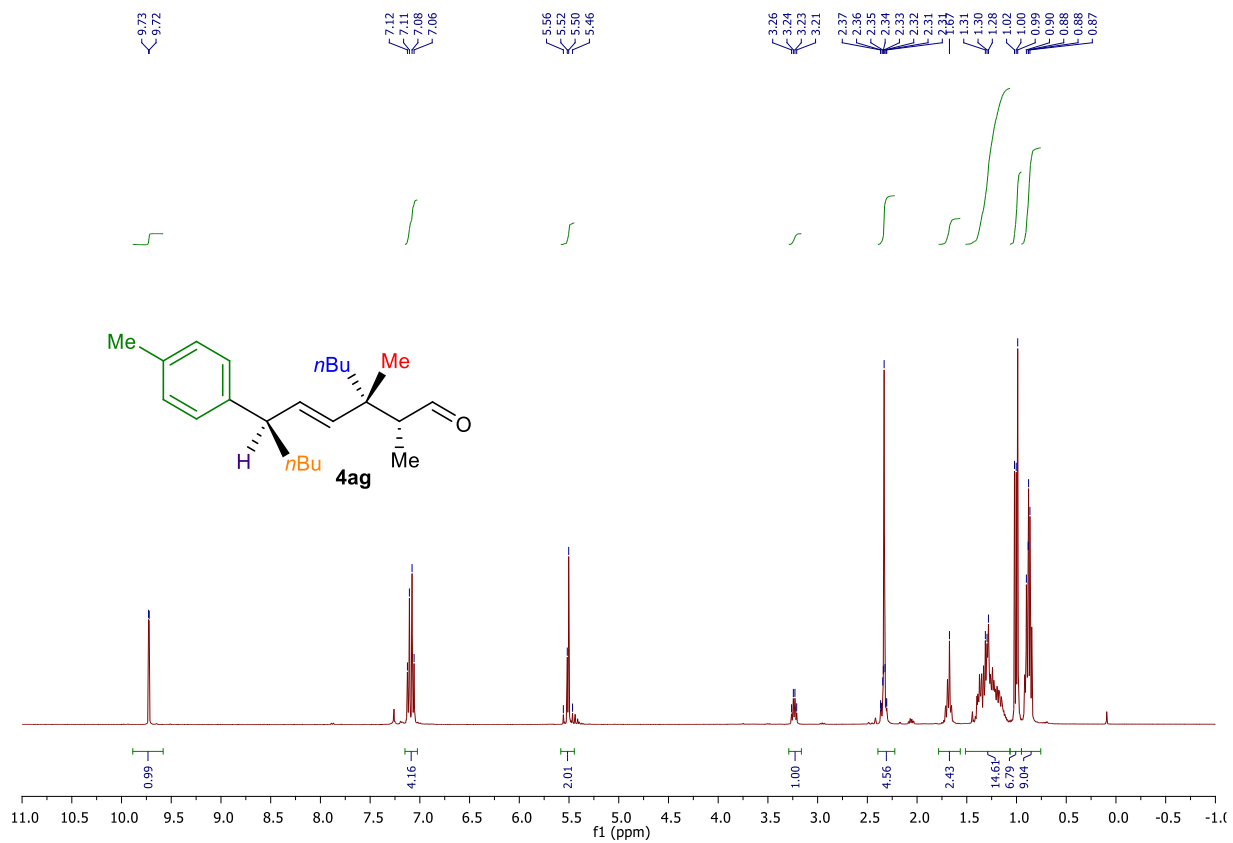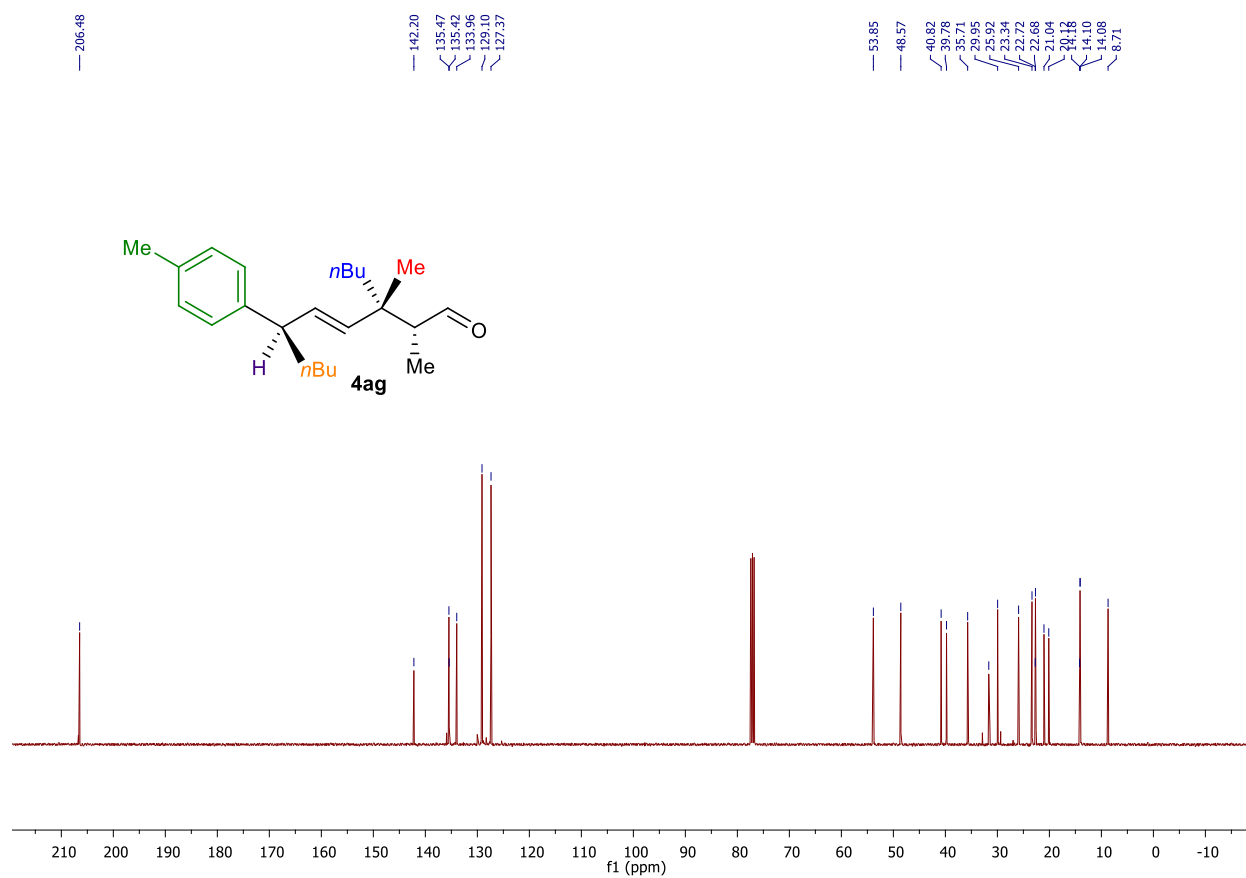



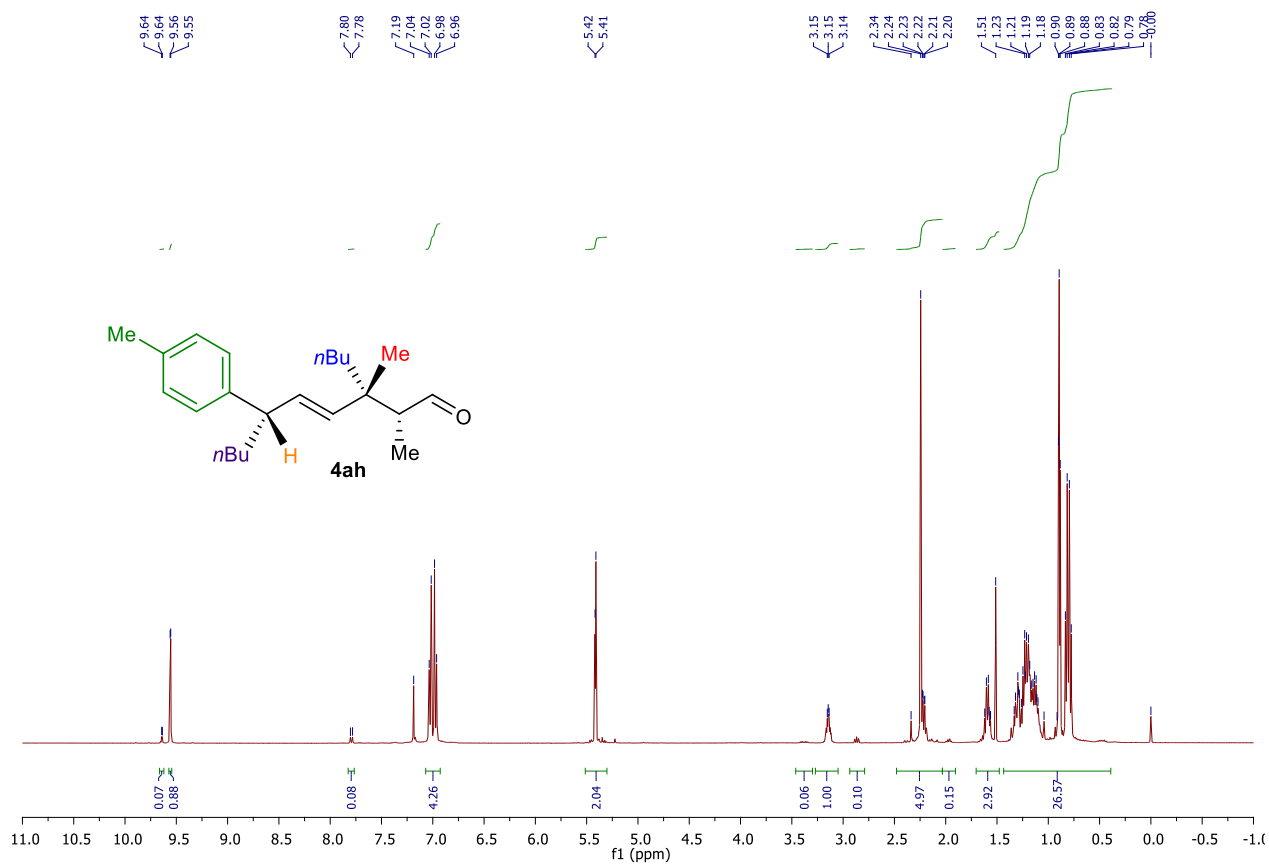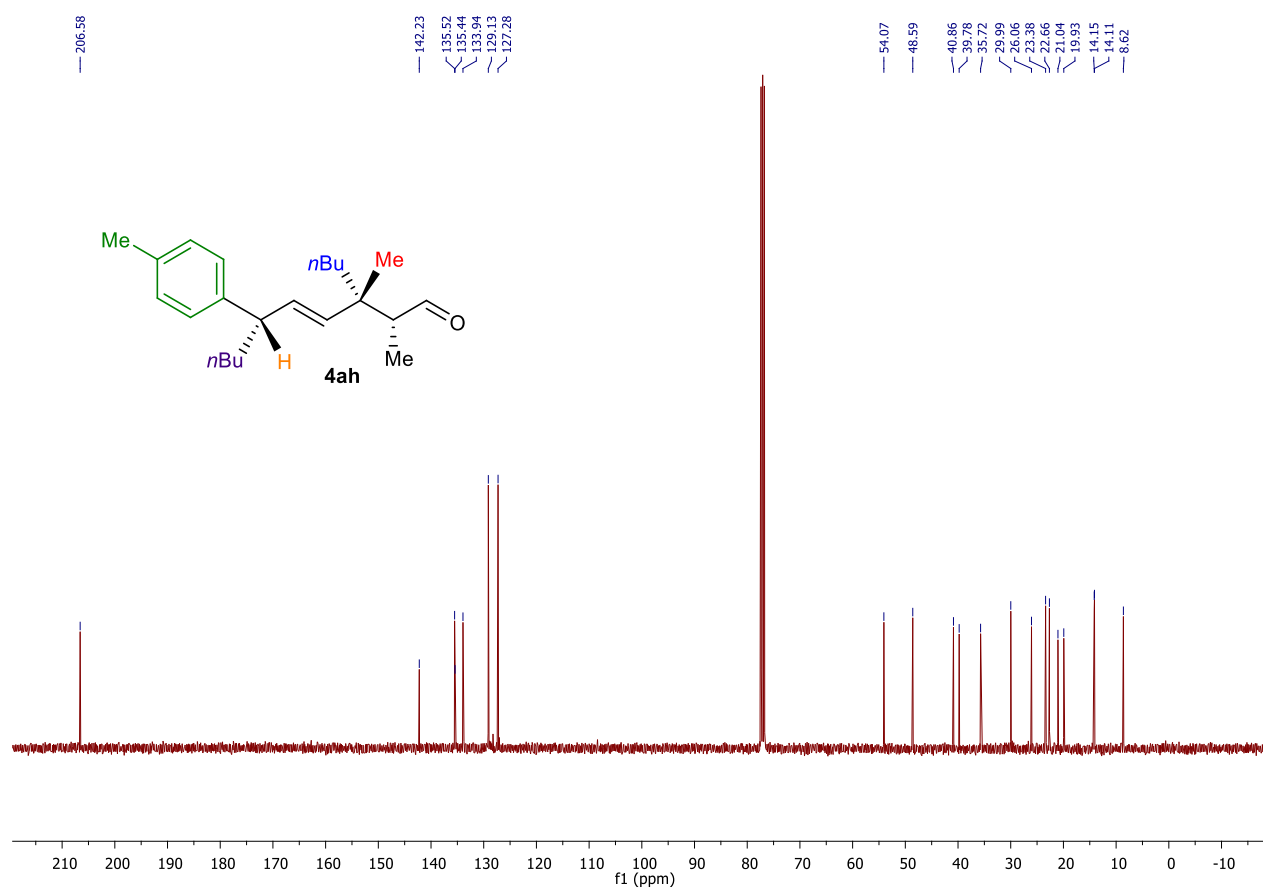

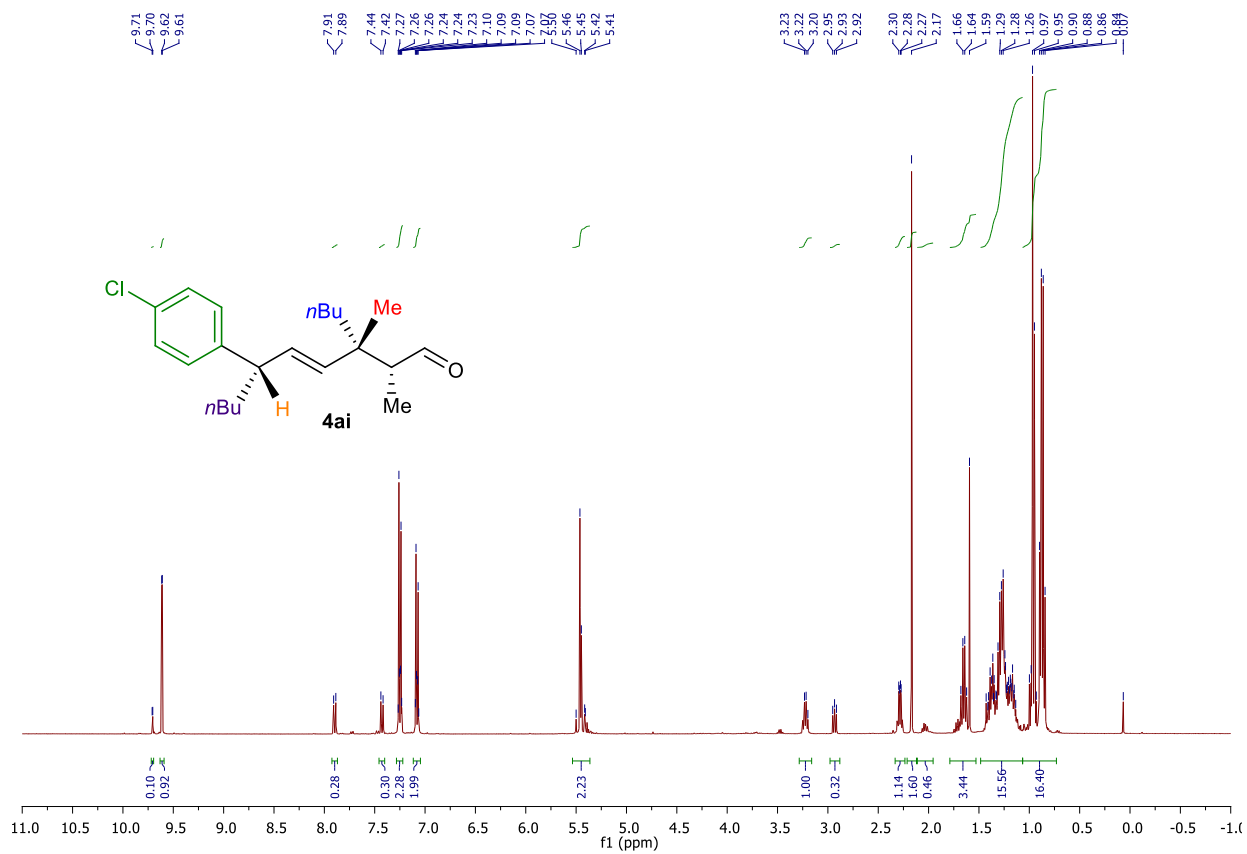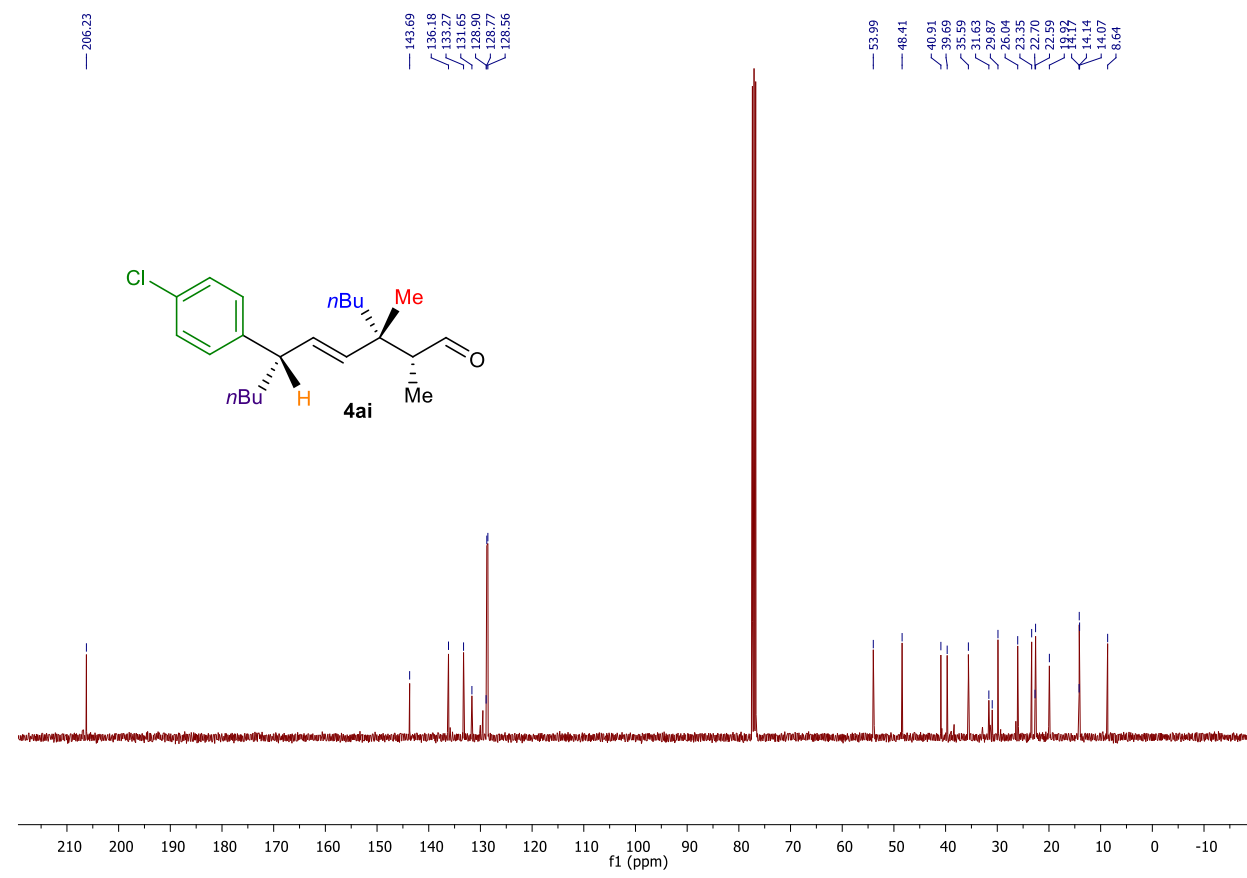

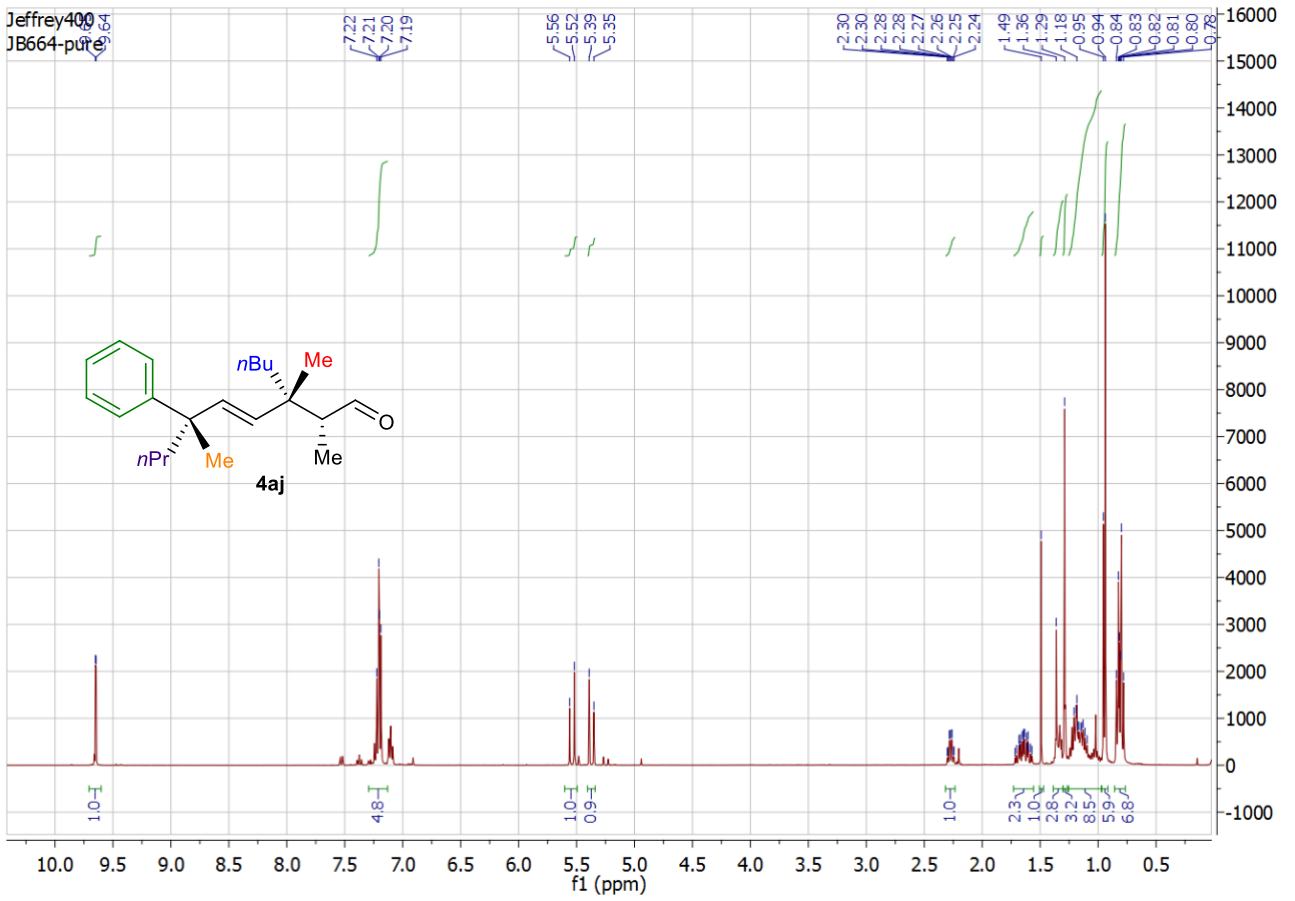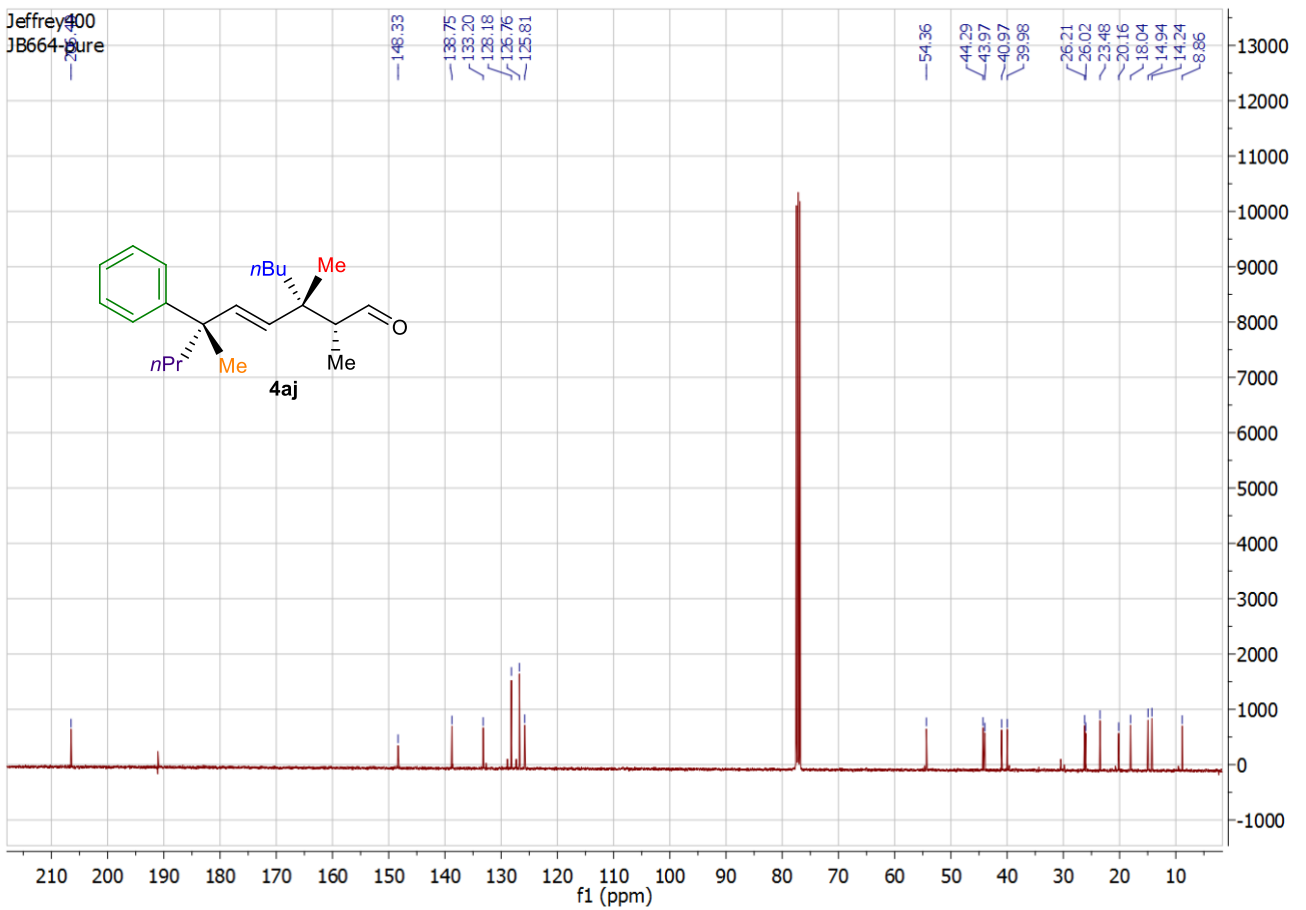

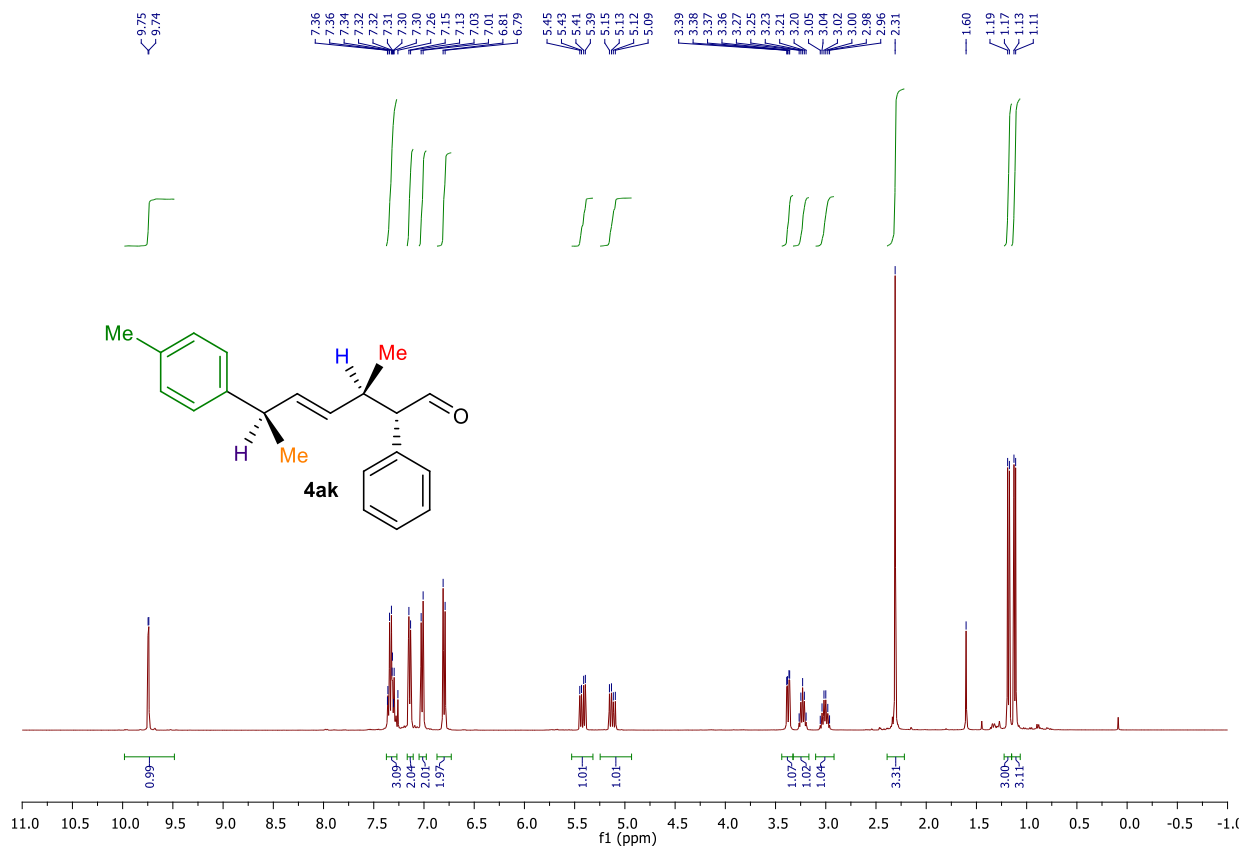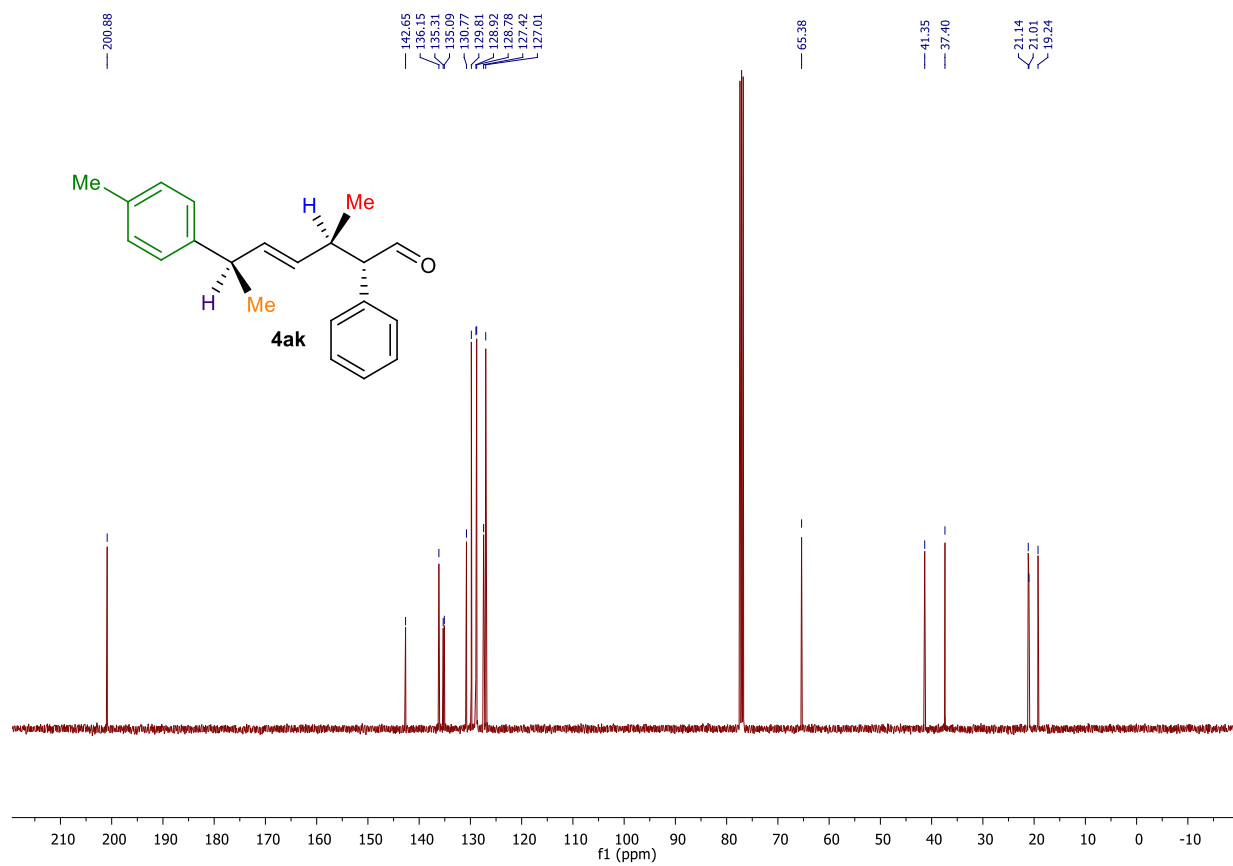

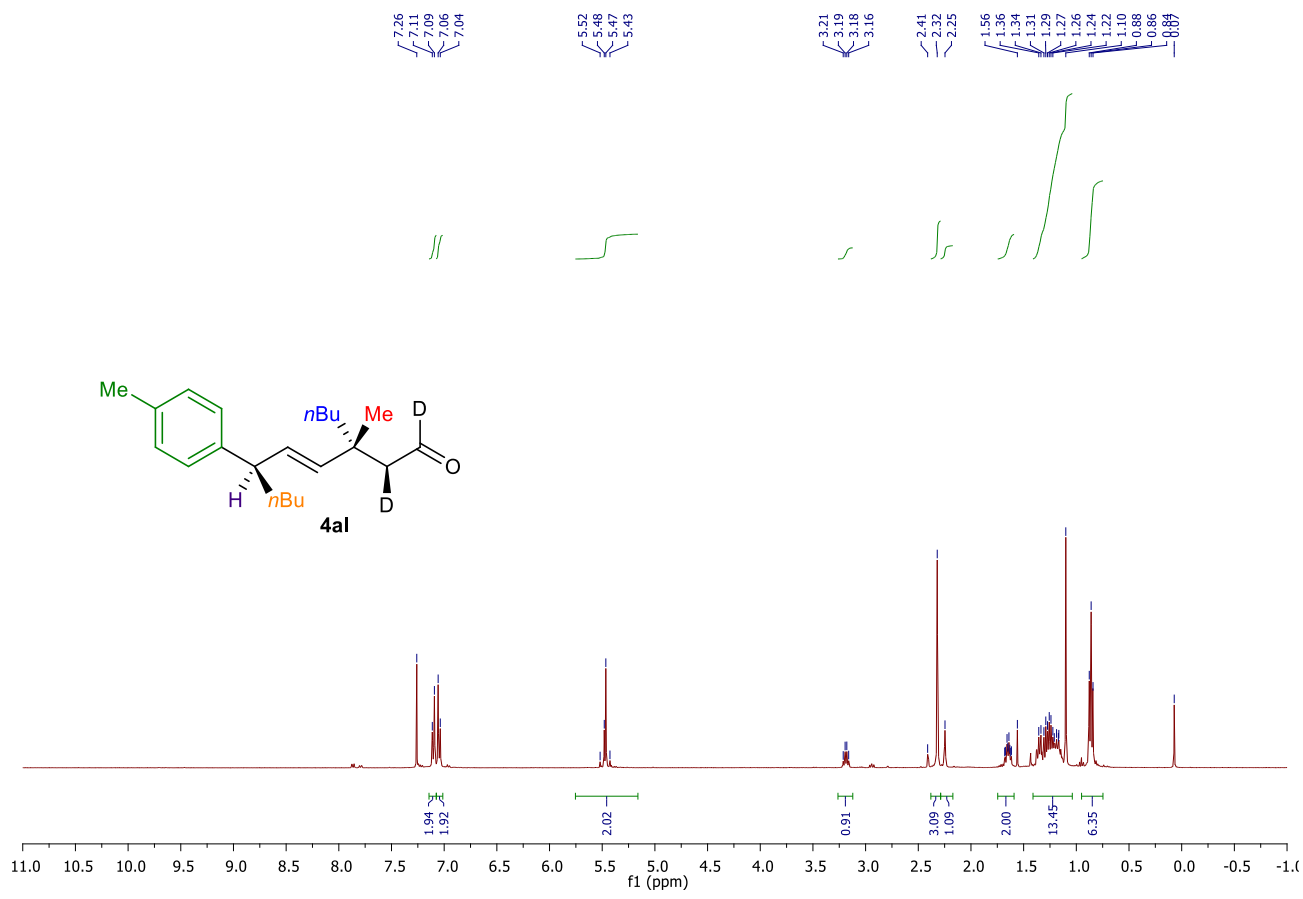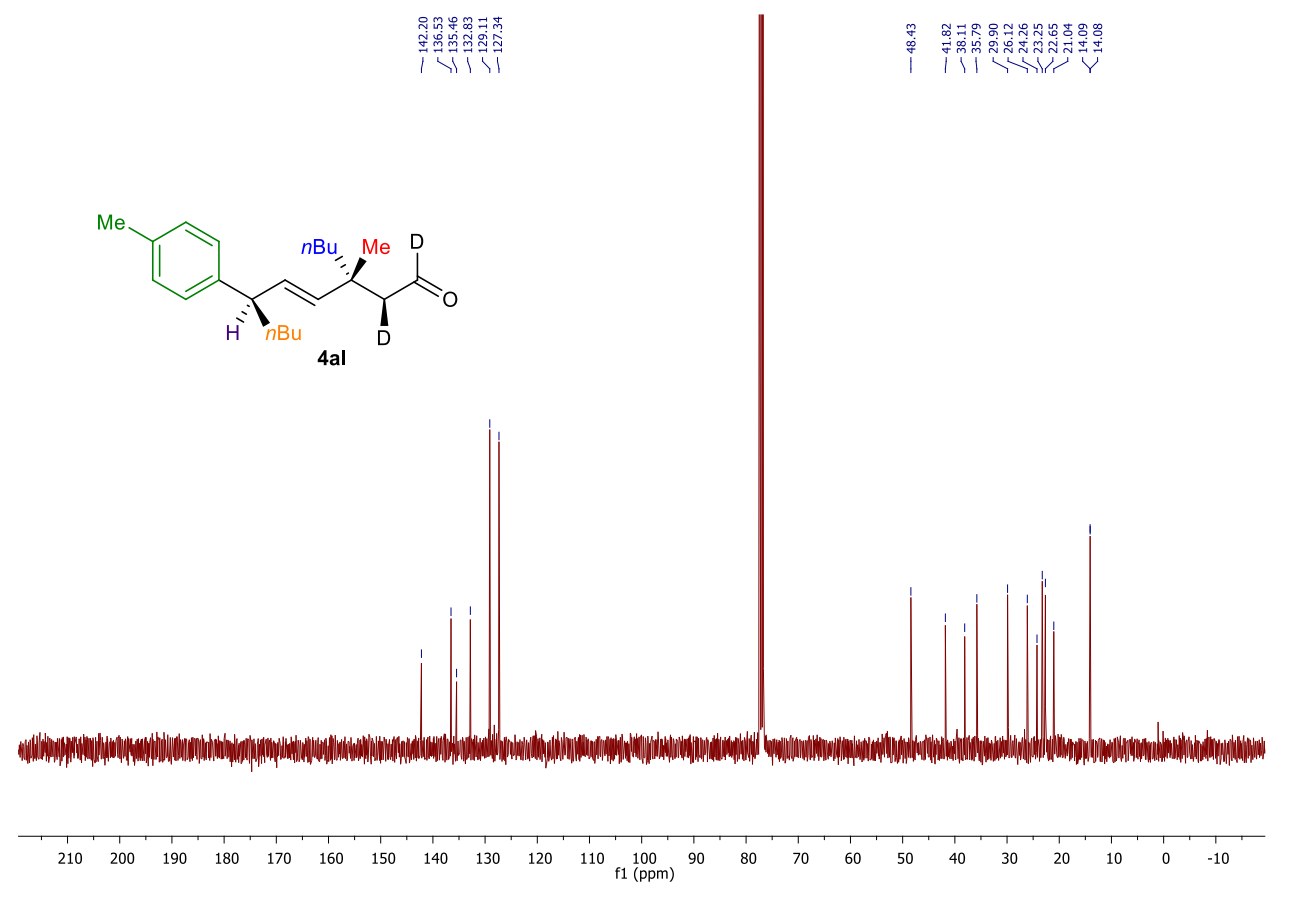

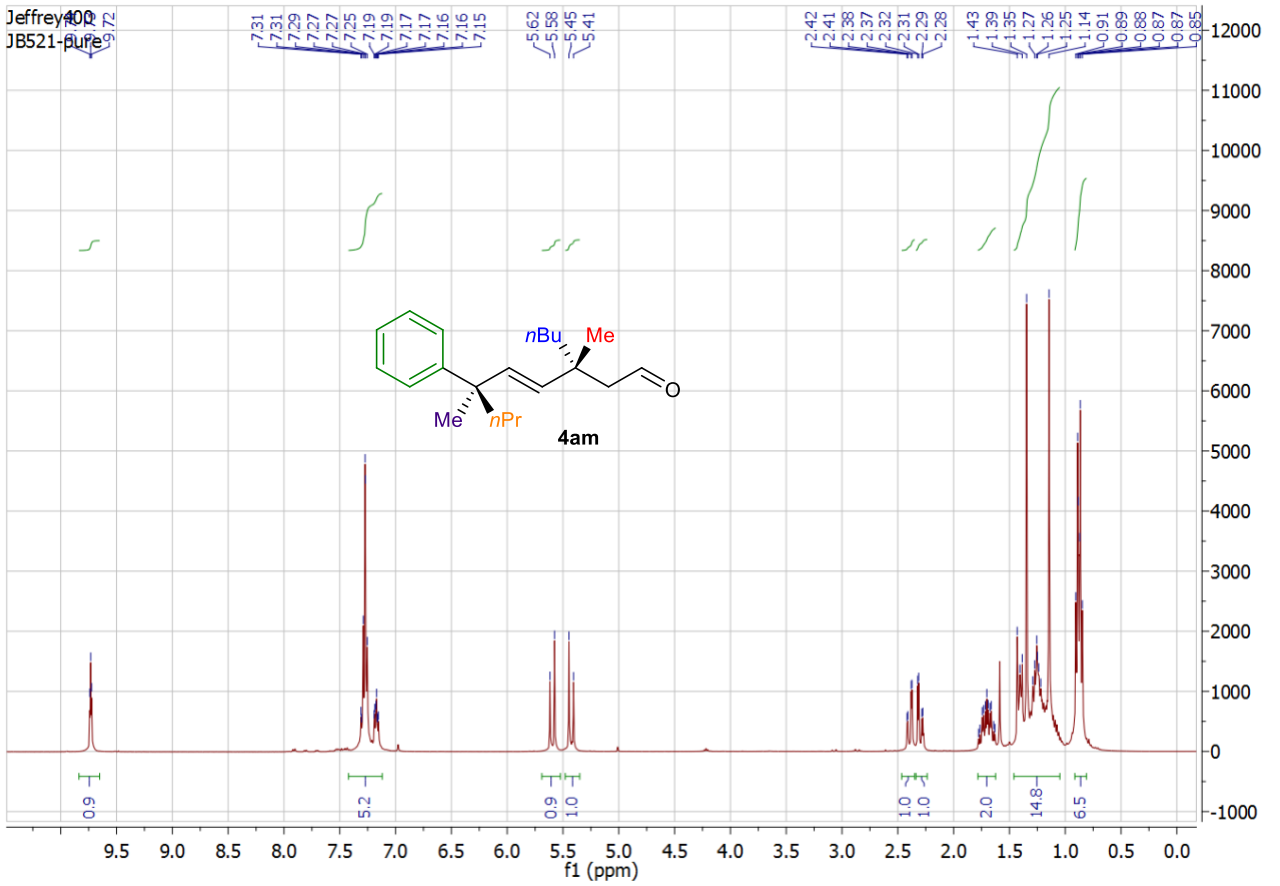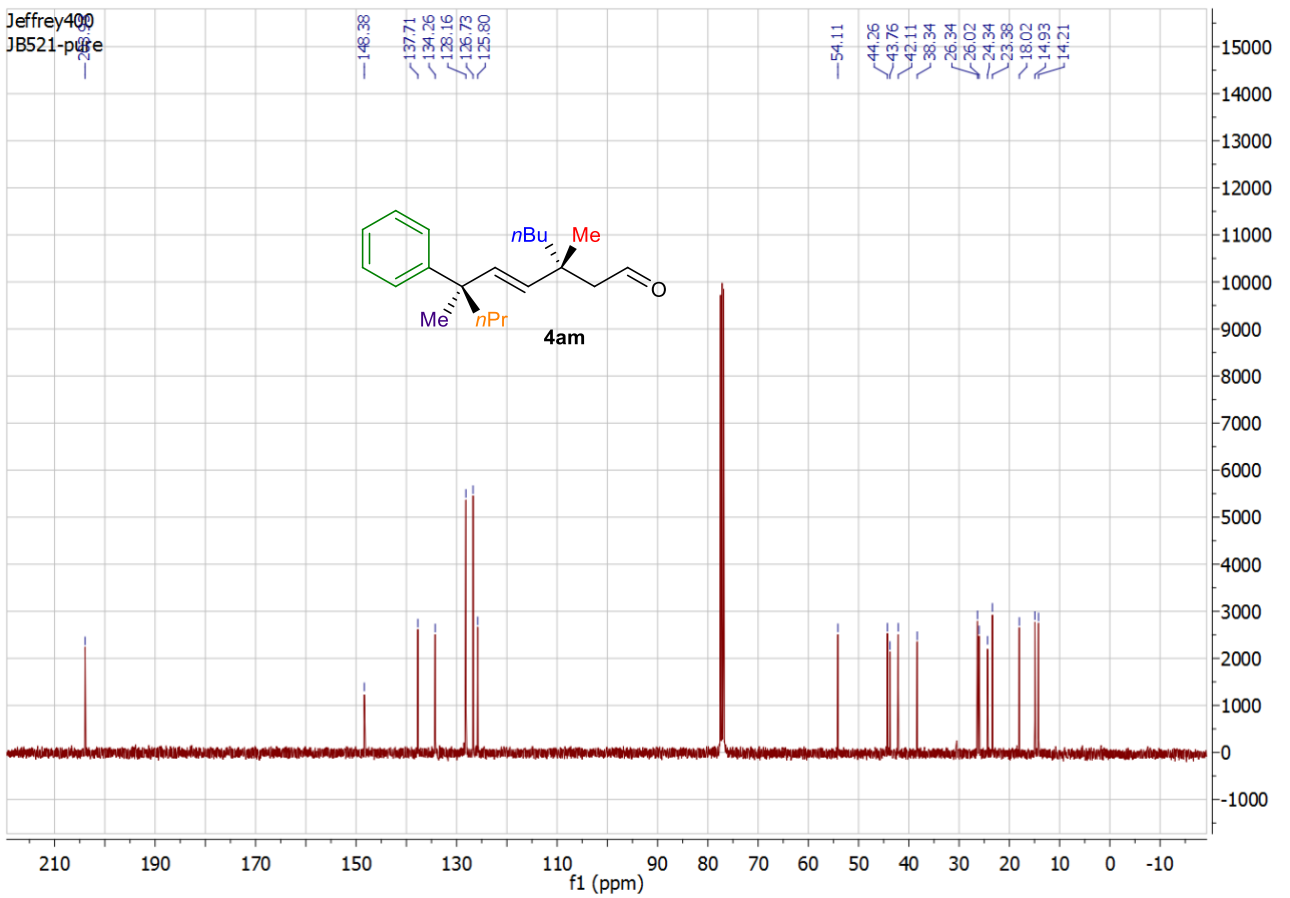

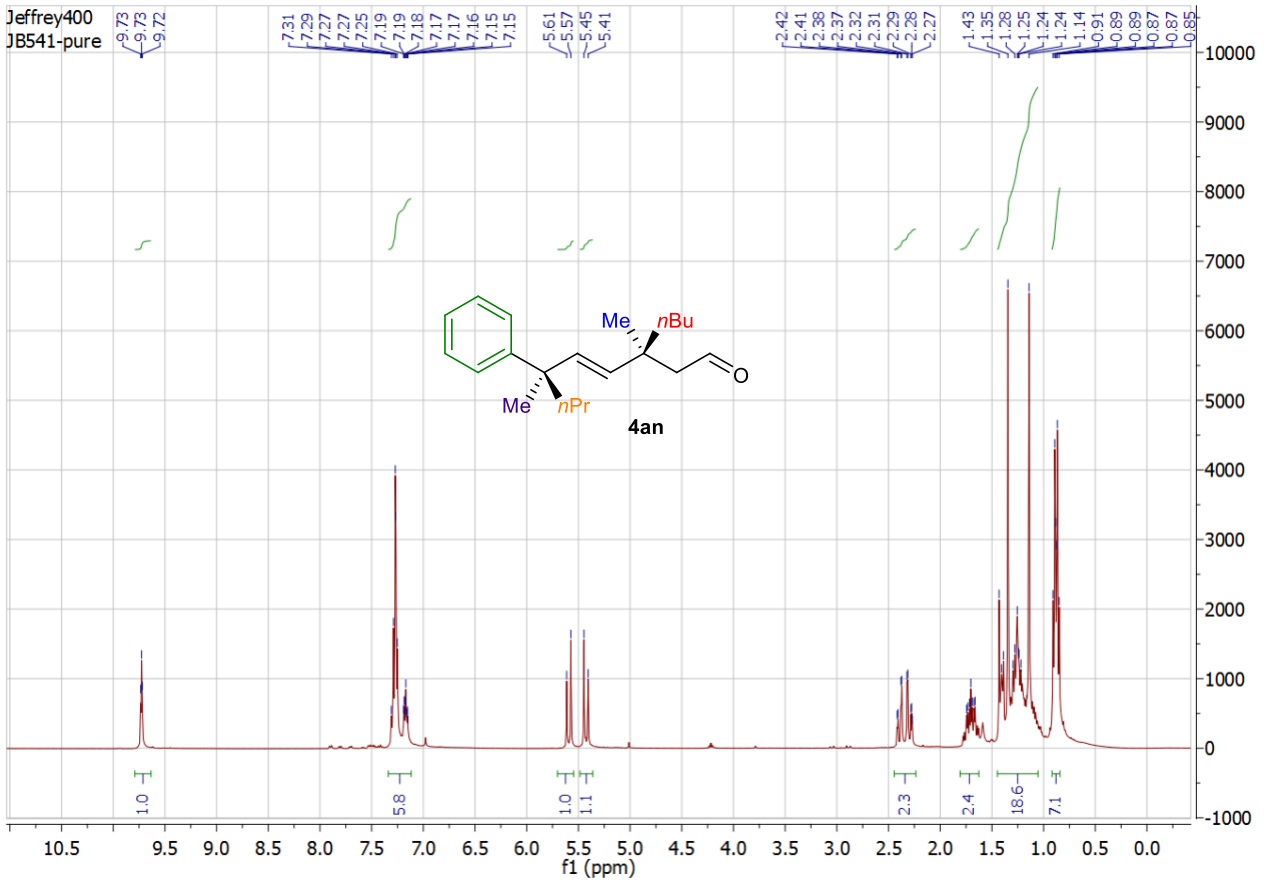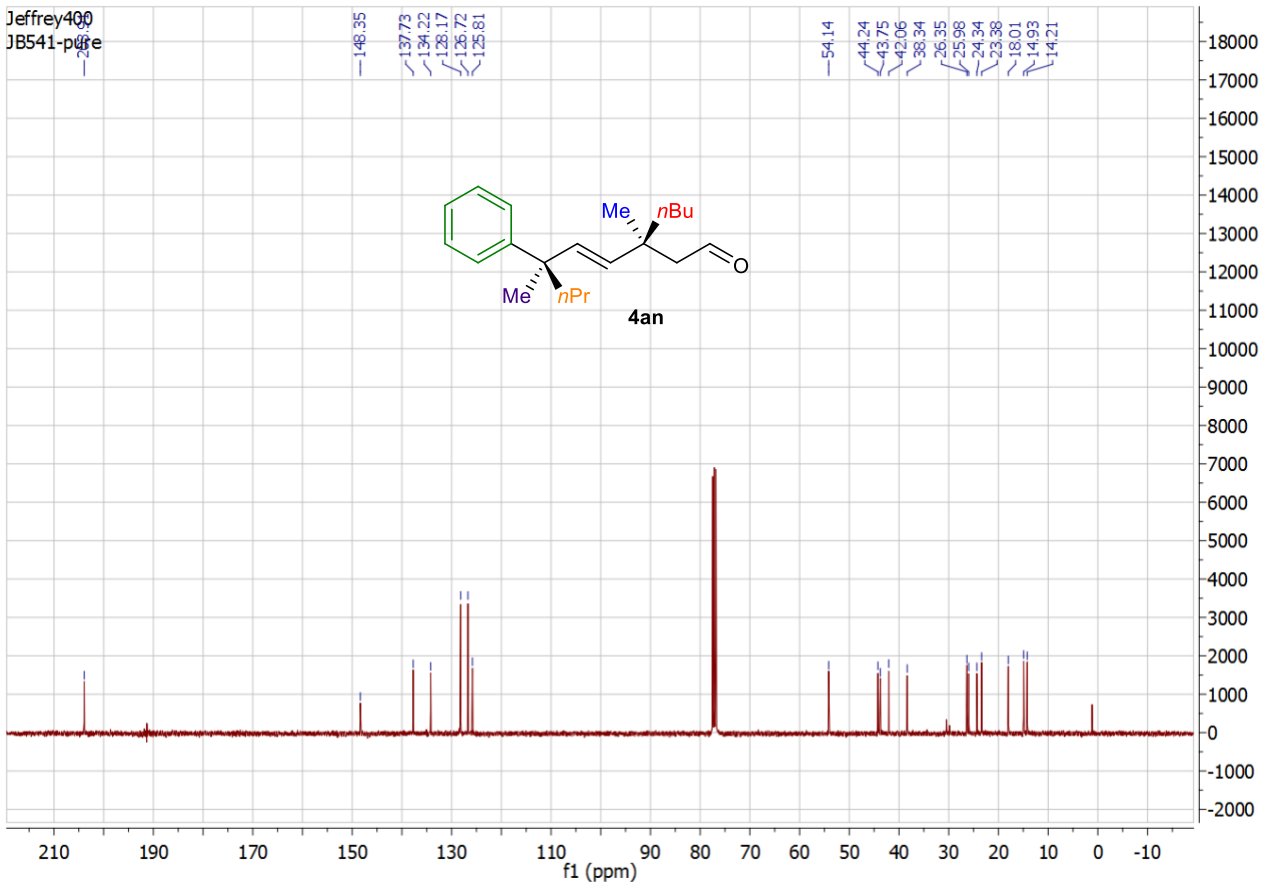

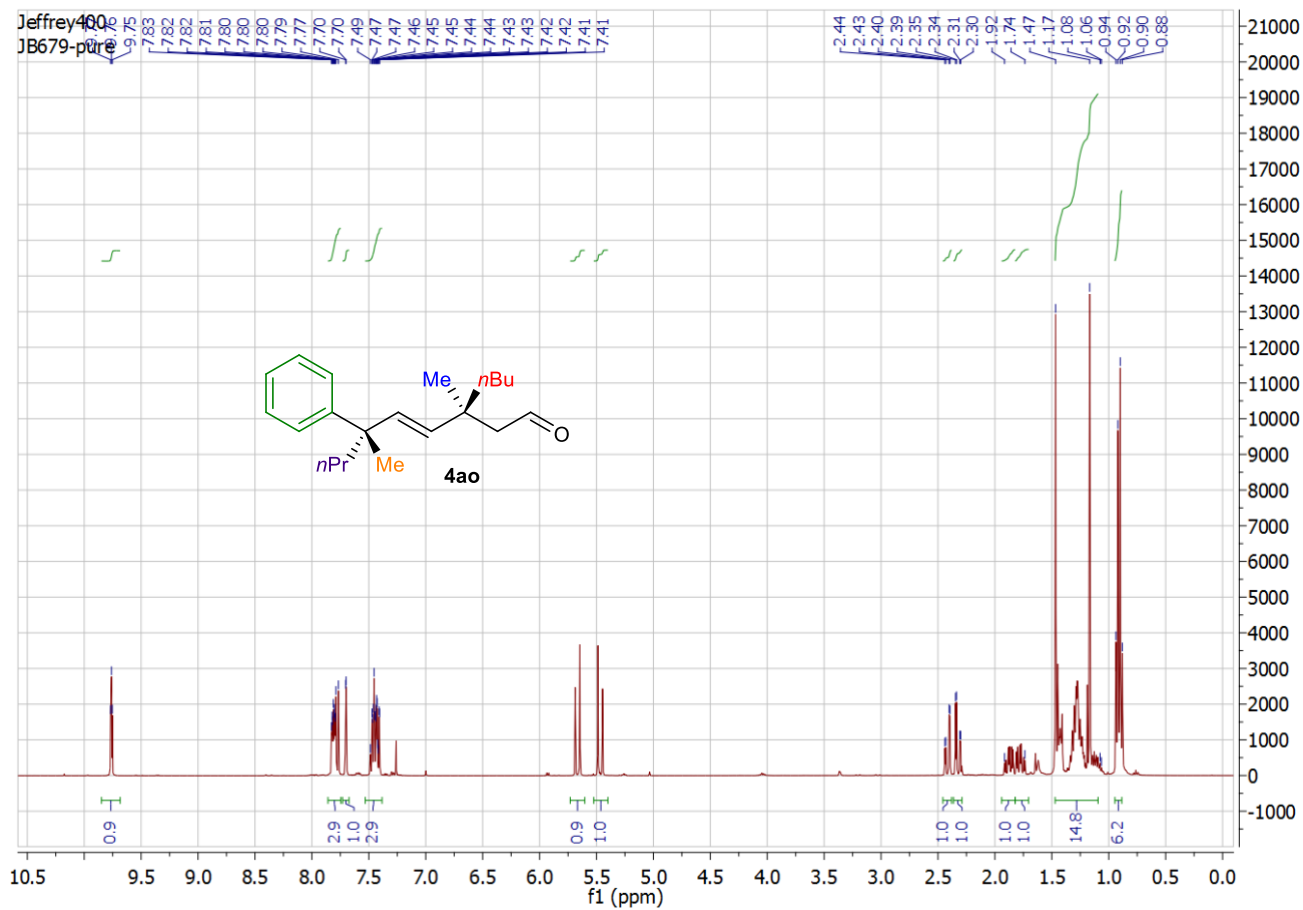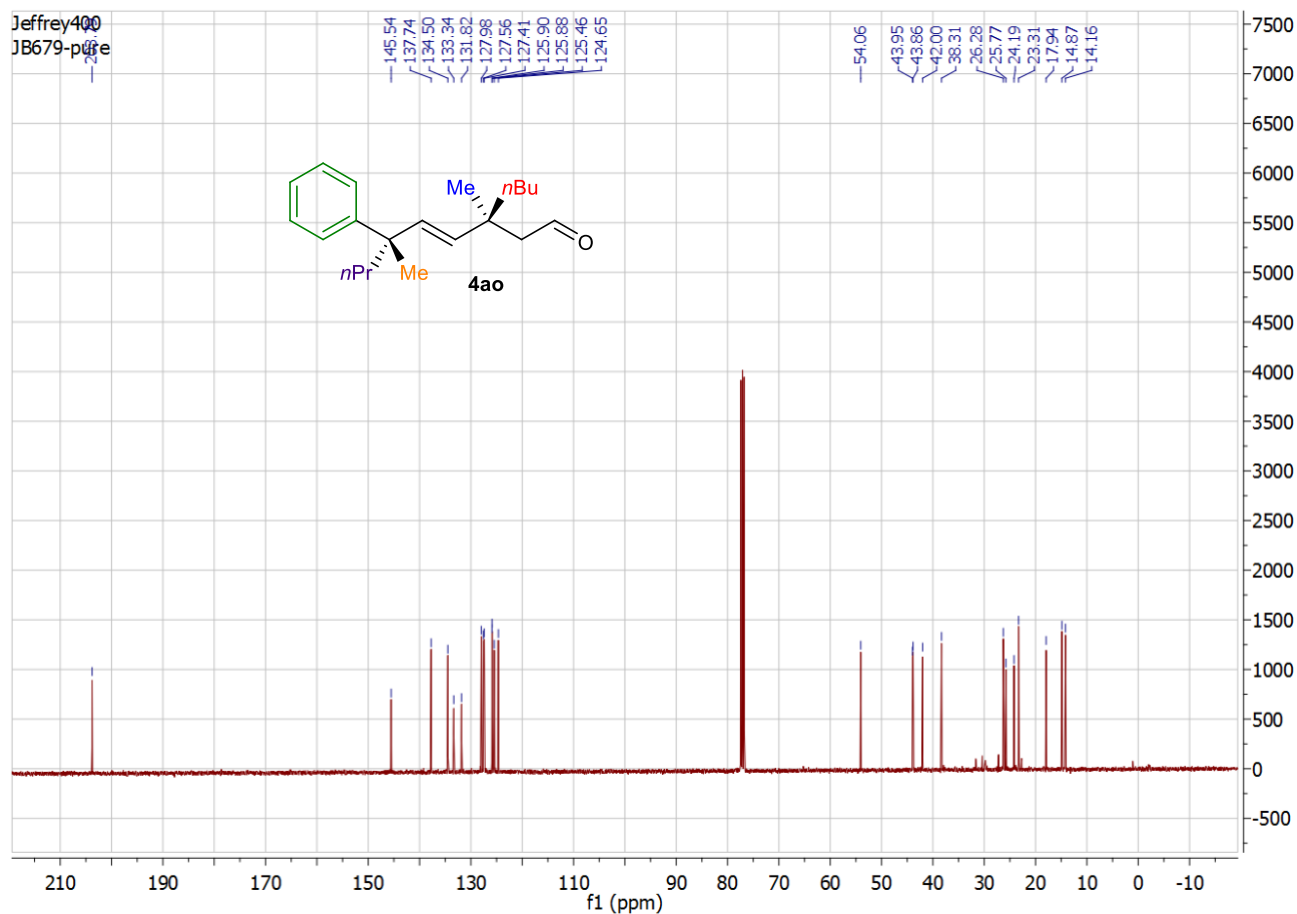



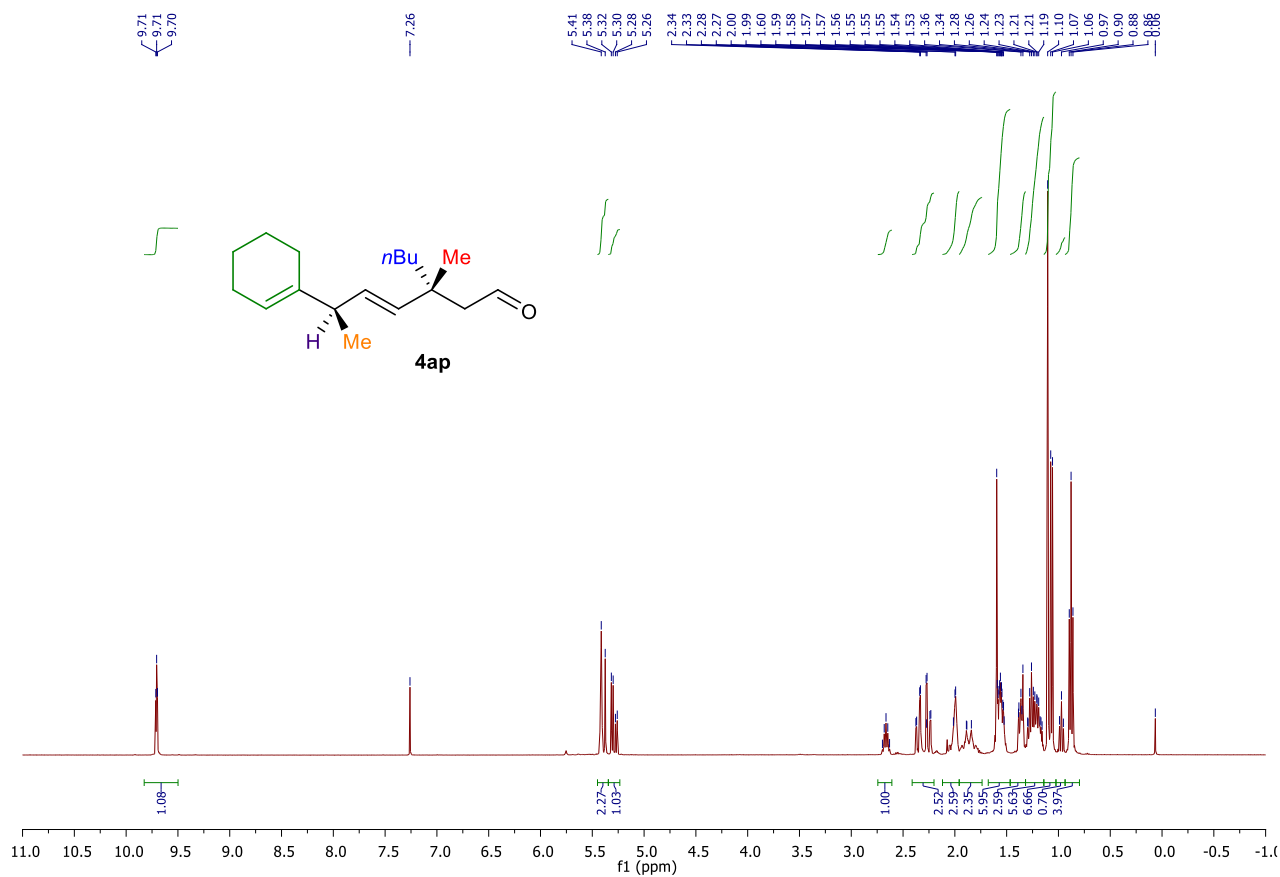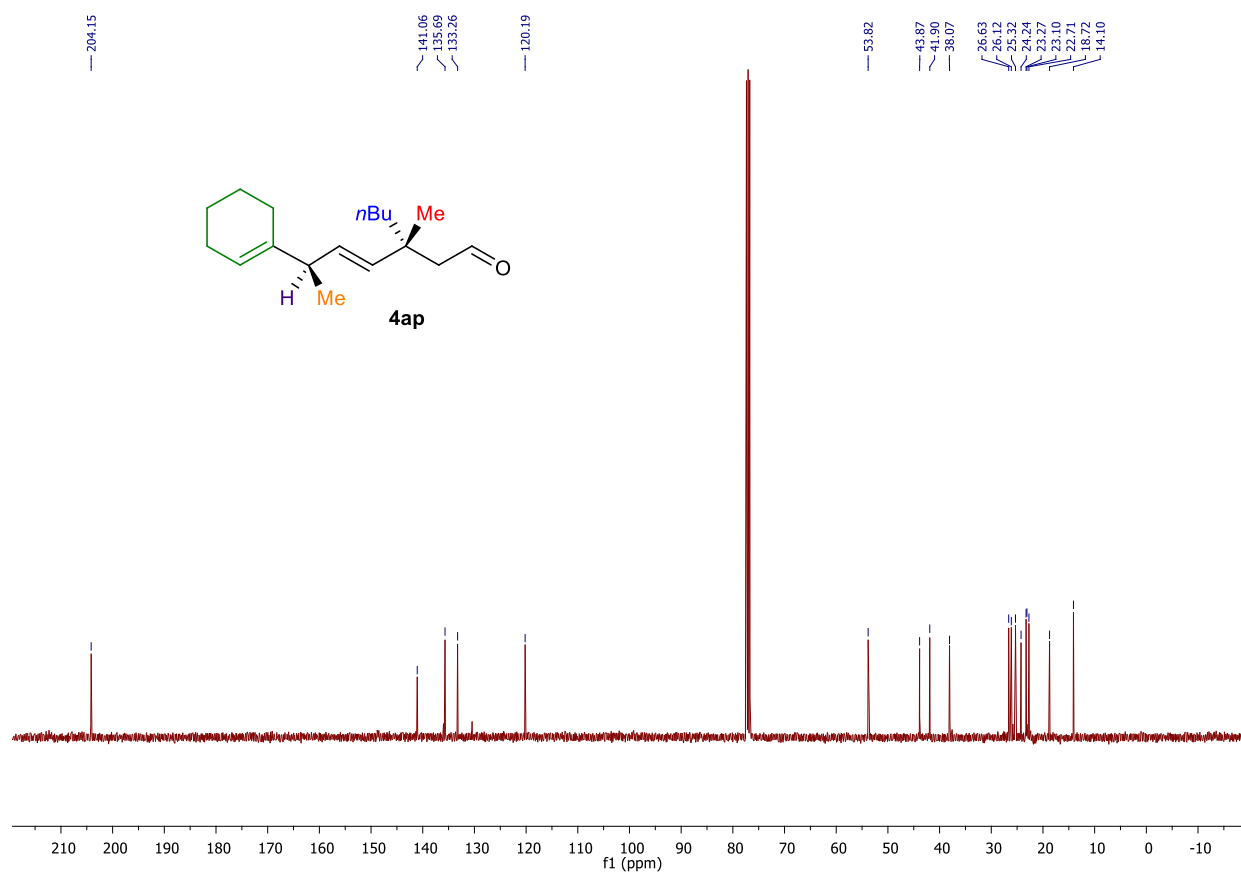

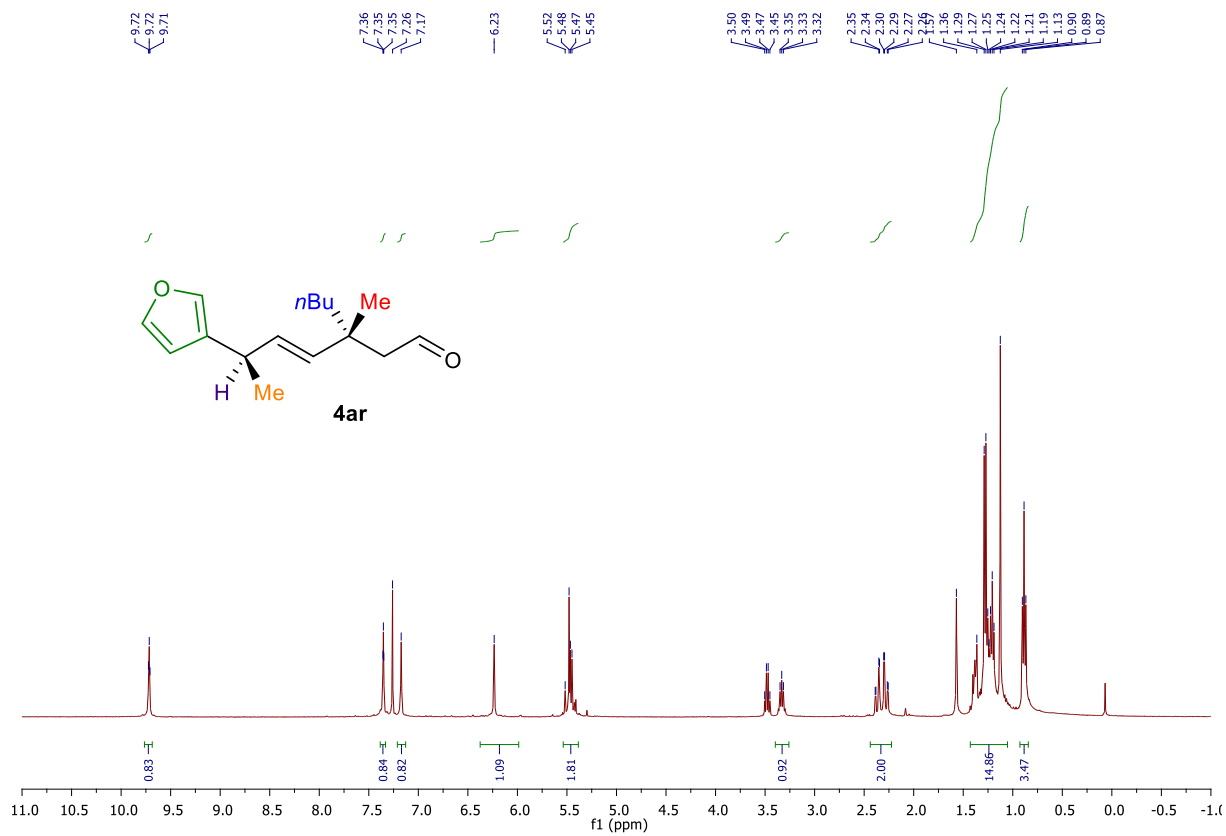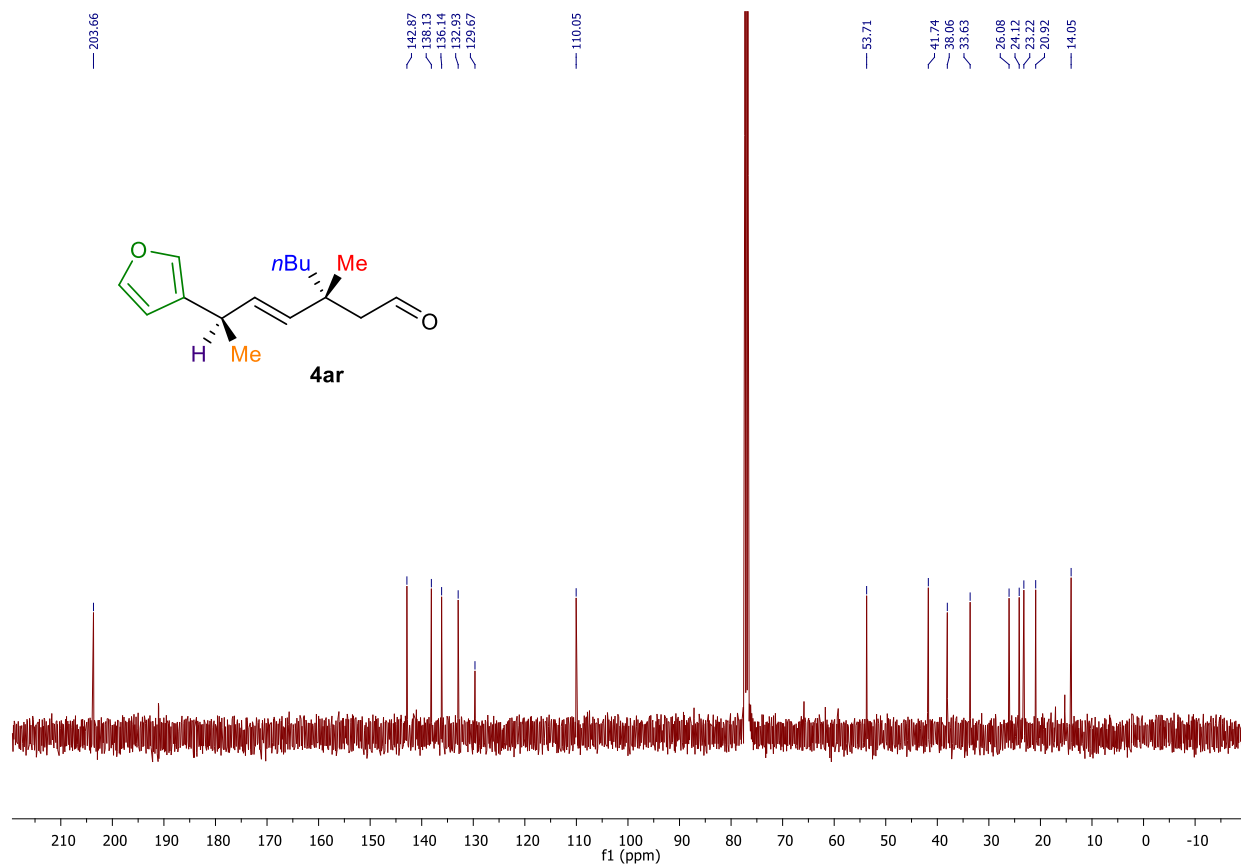

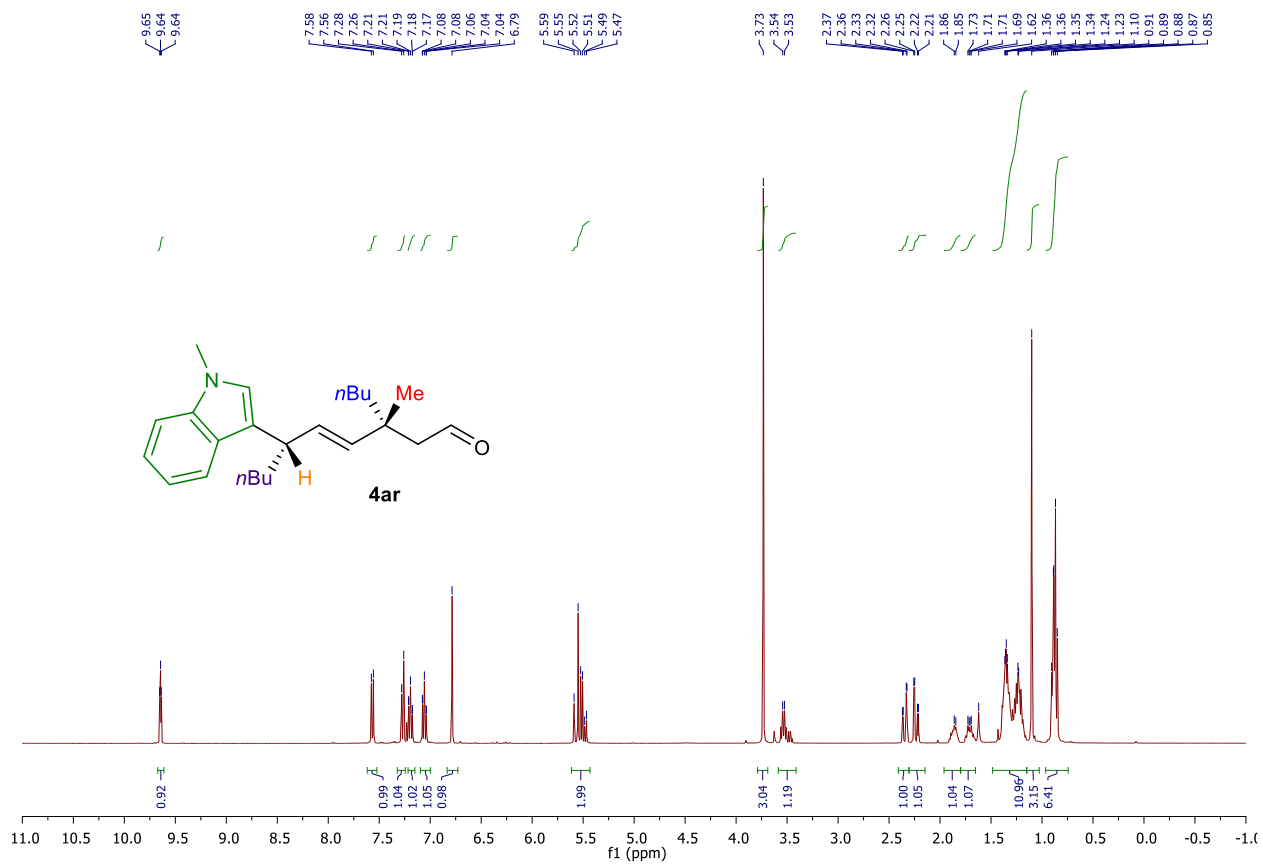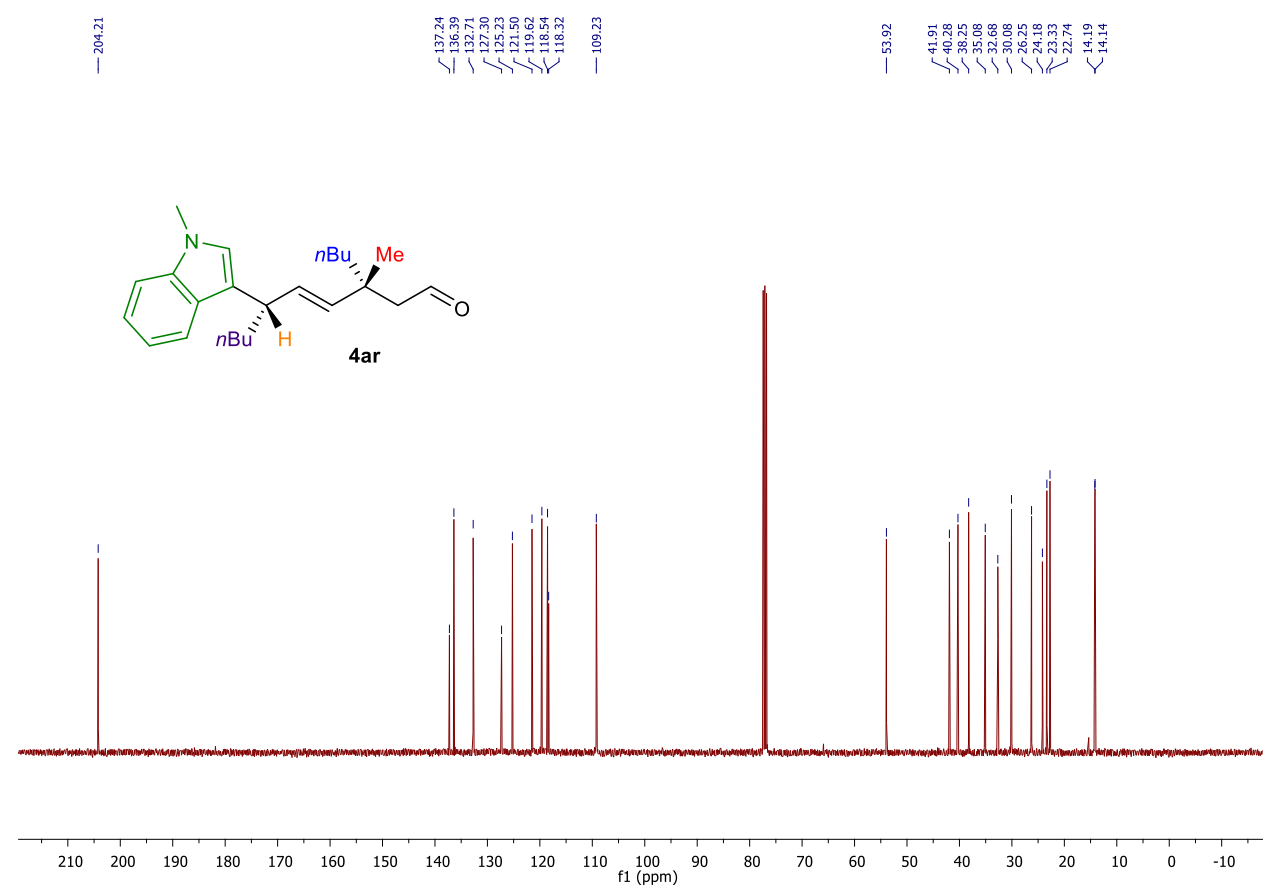

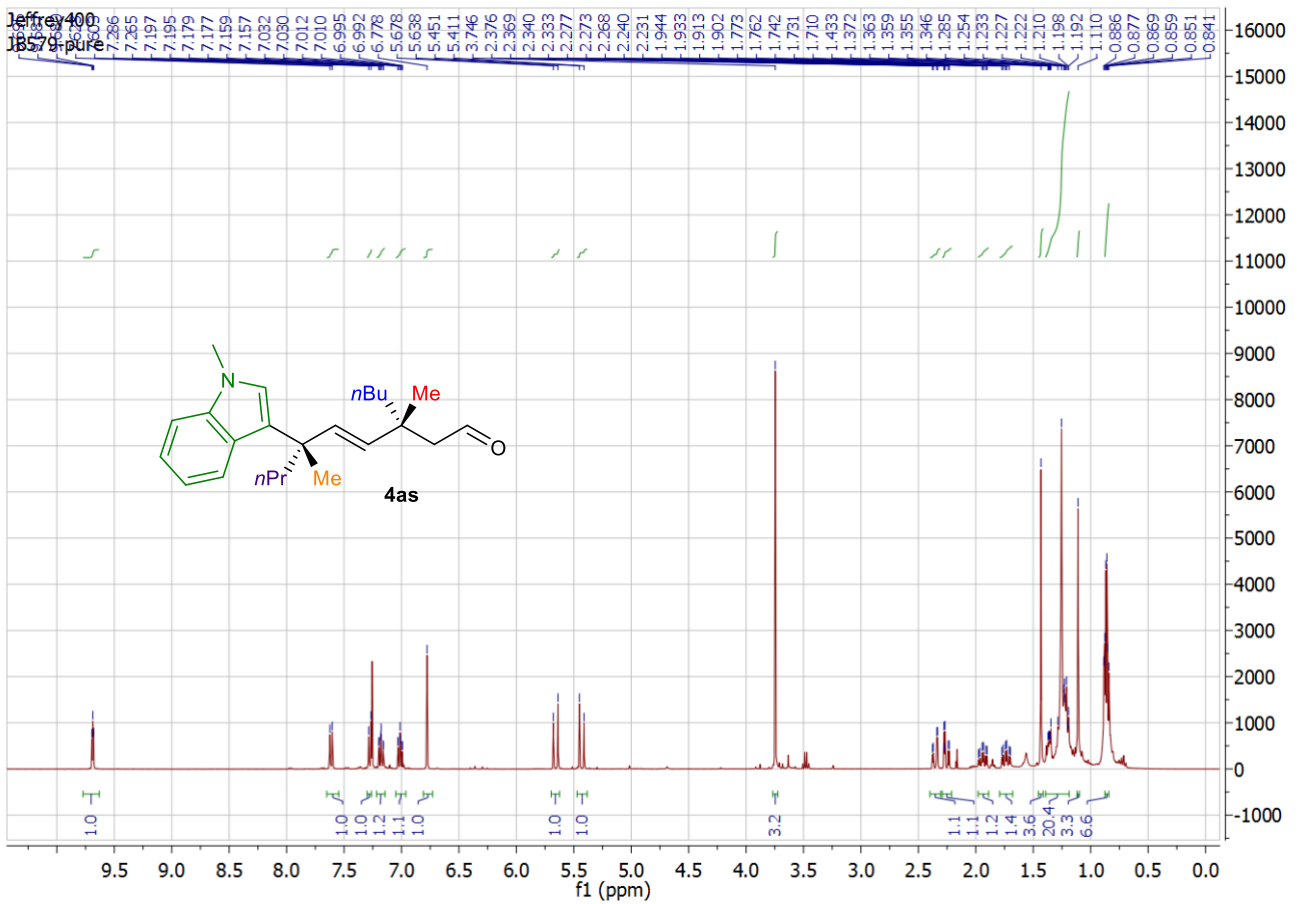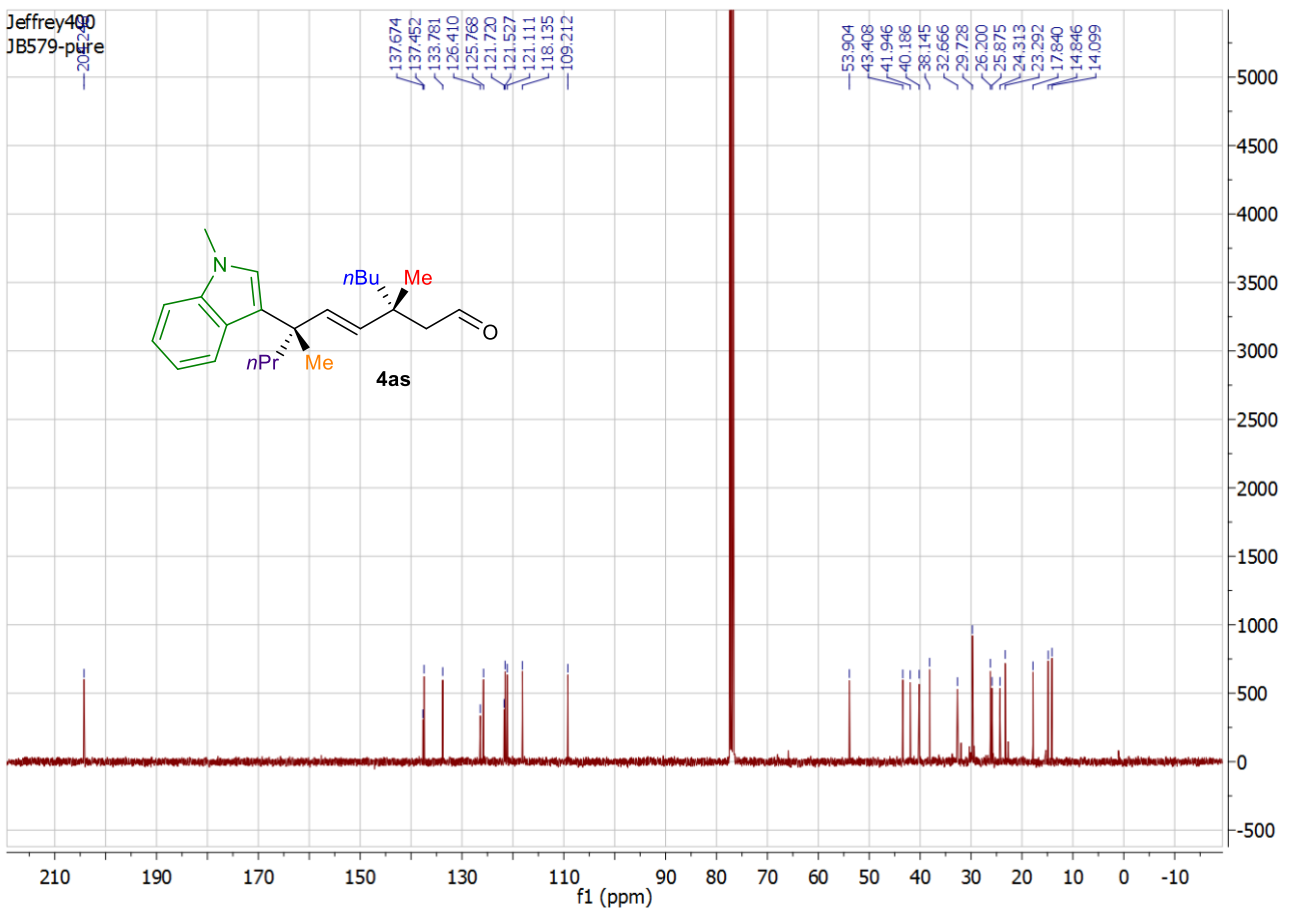

# NMR spectras of derivatives 5, 6a and 6b

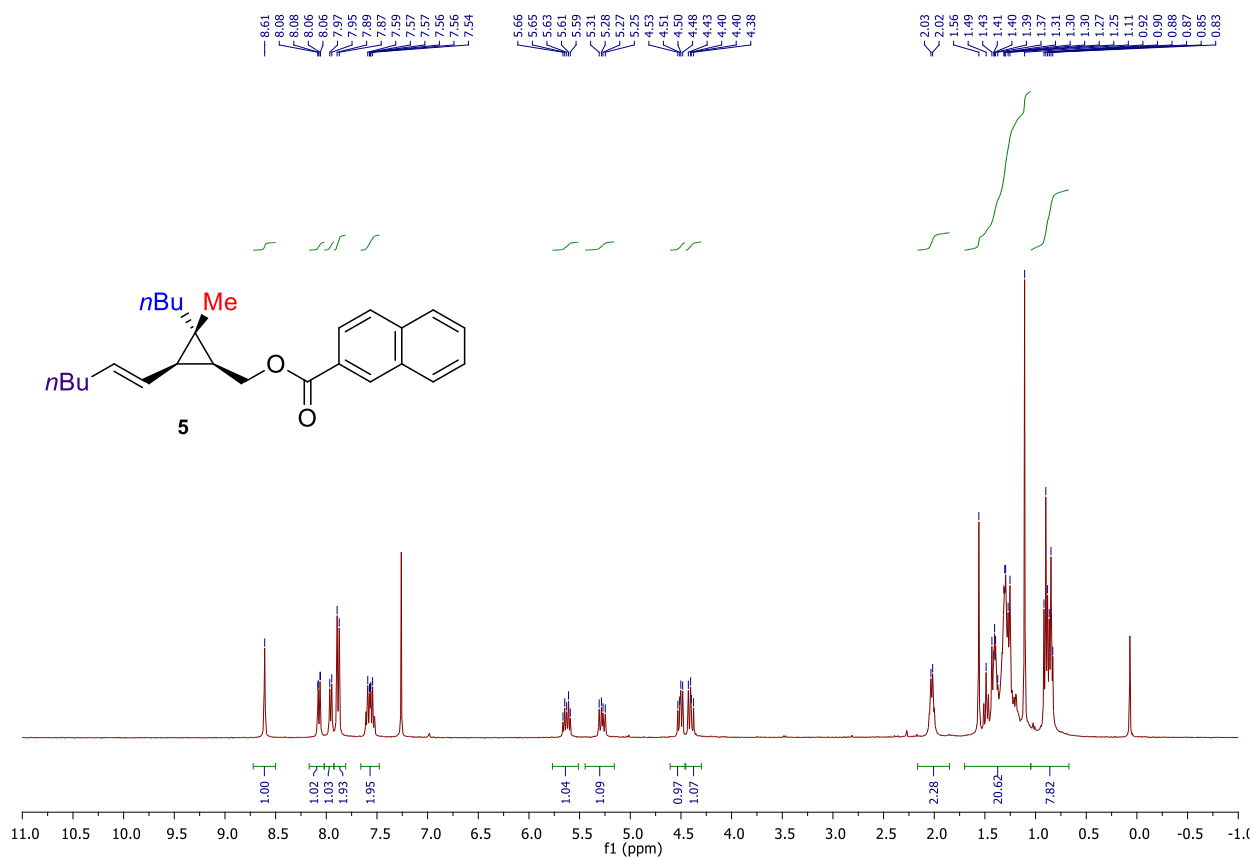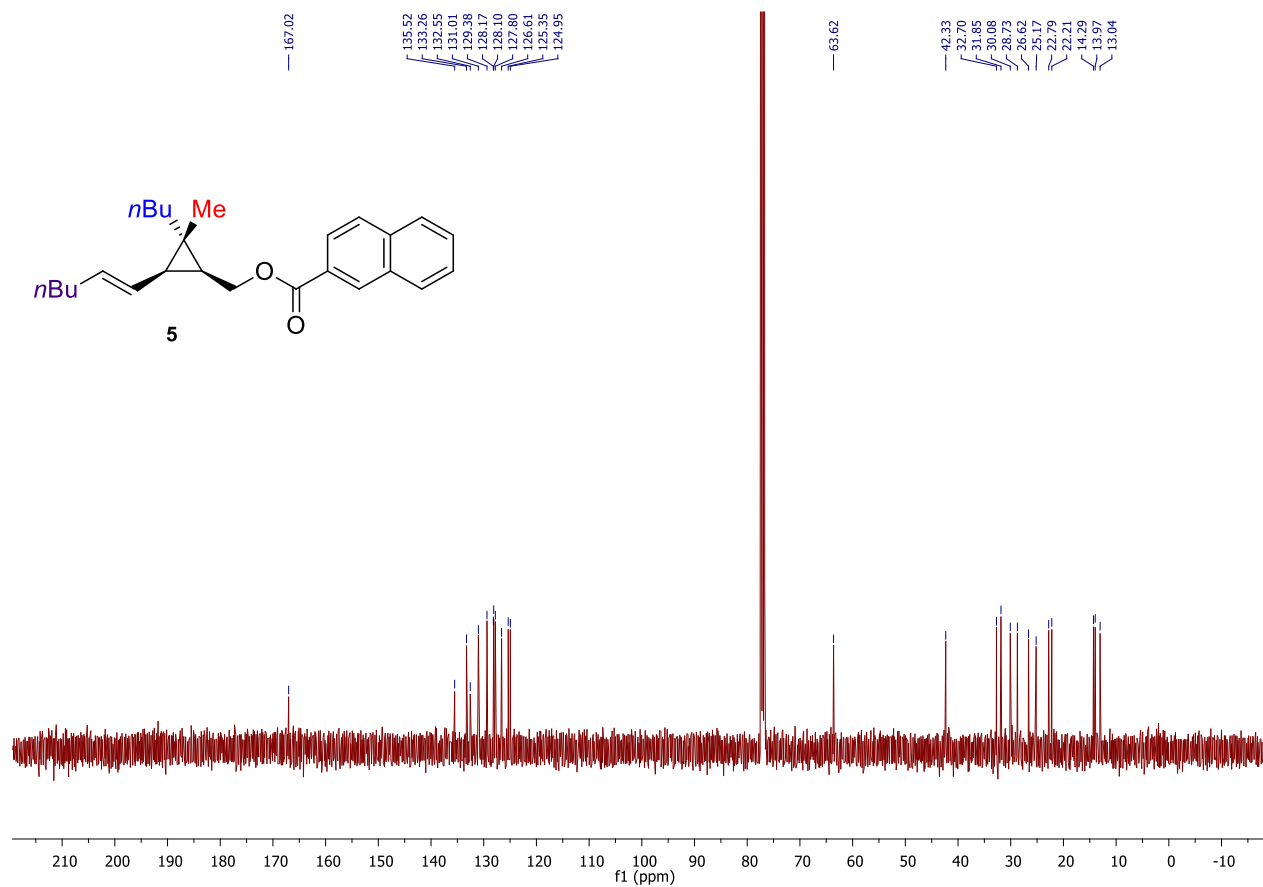

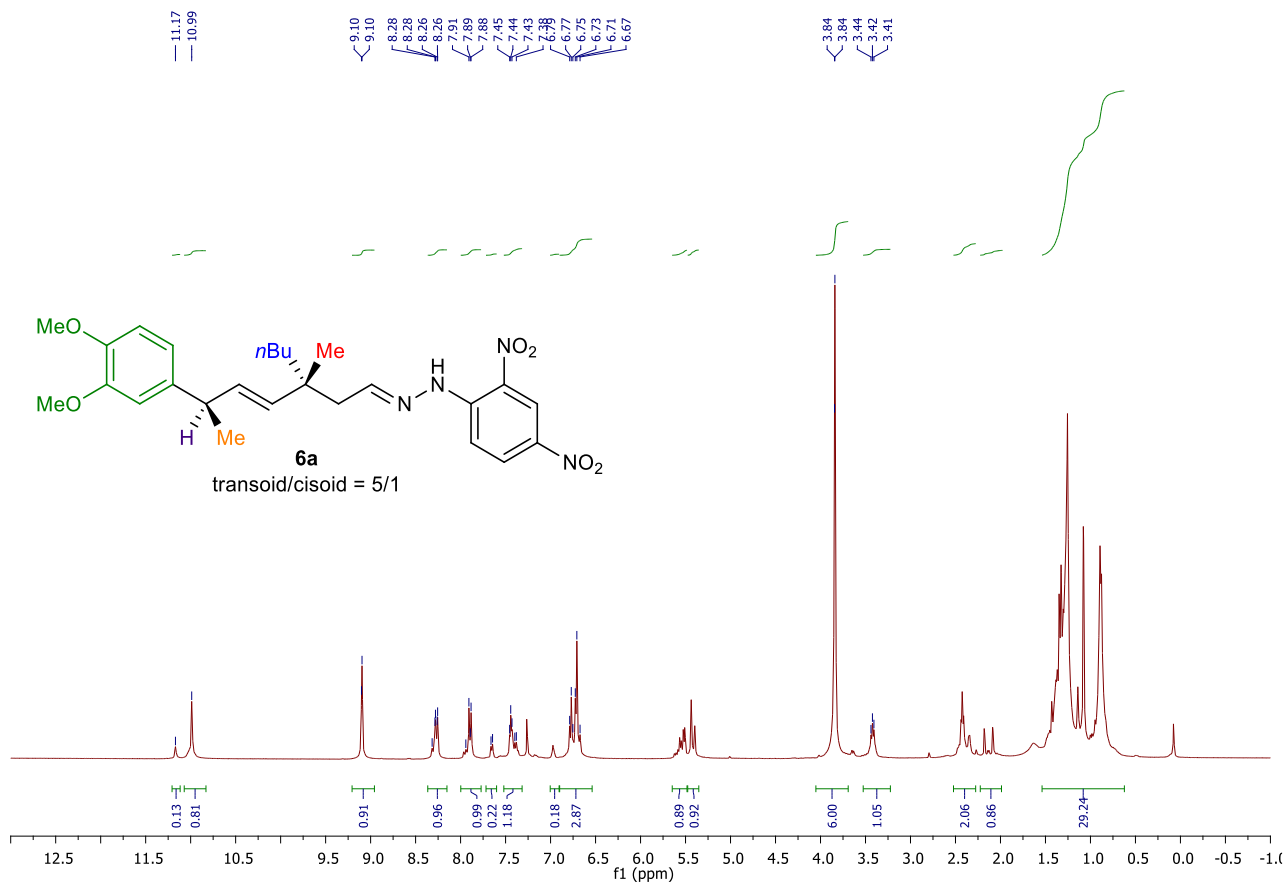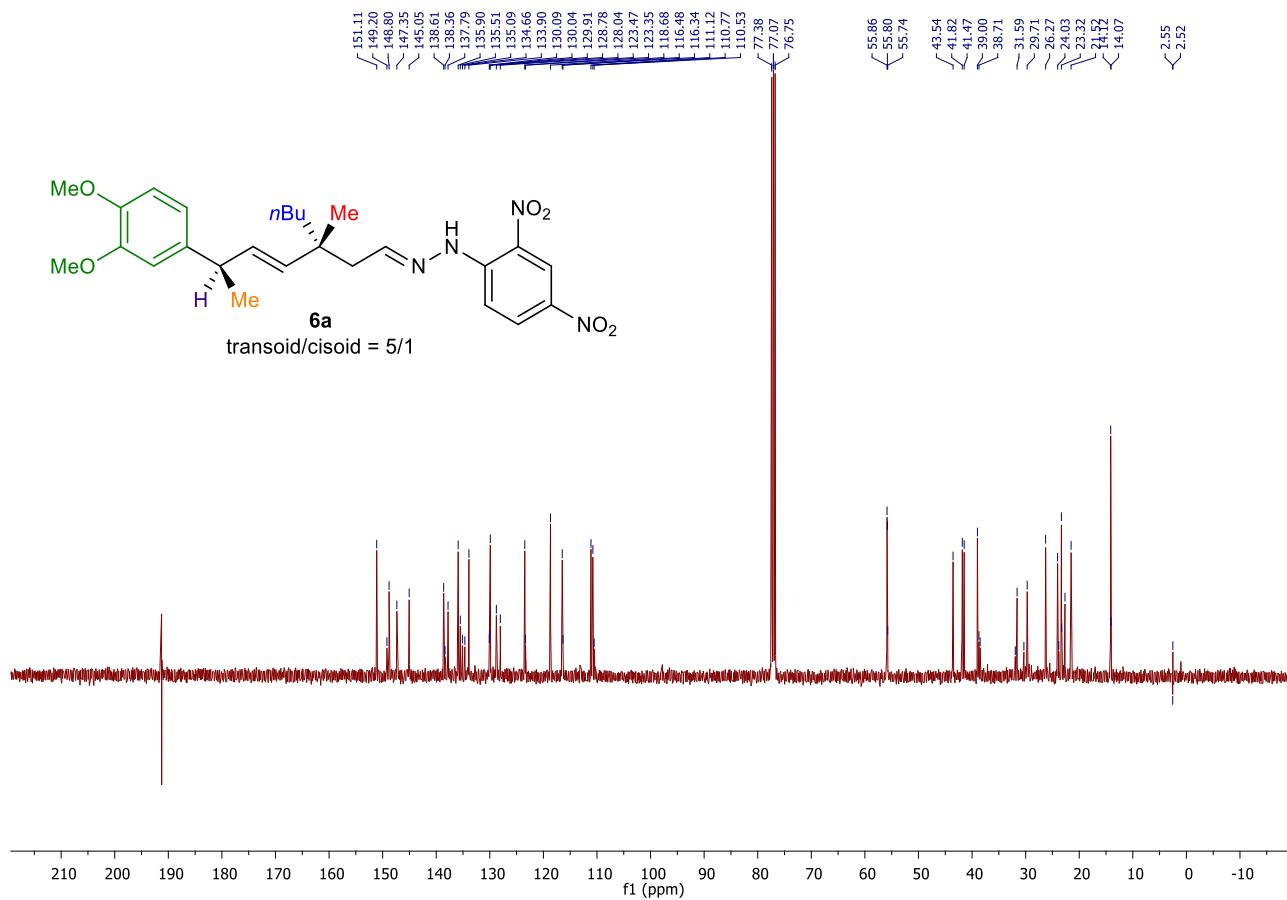

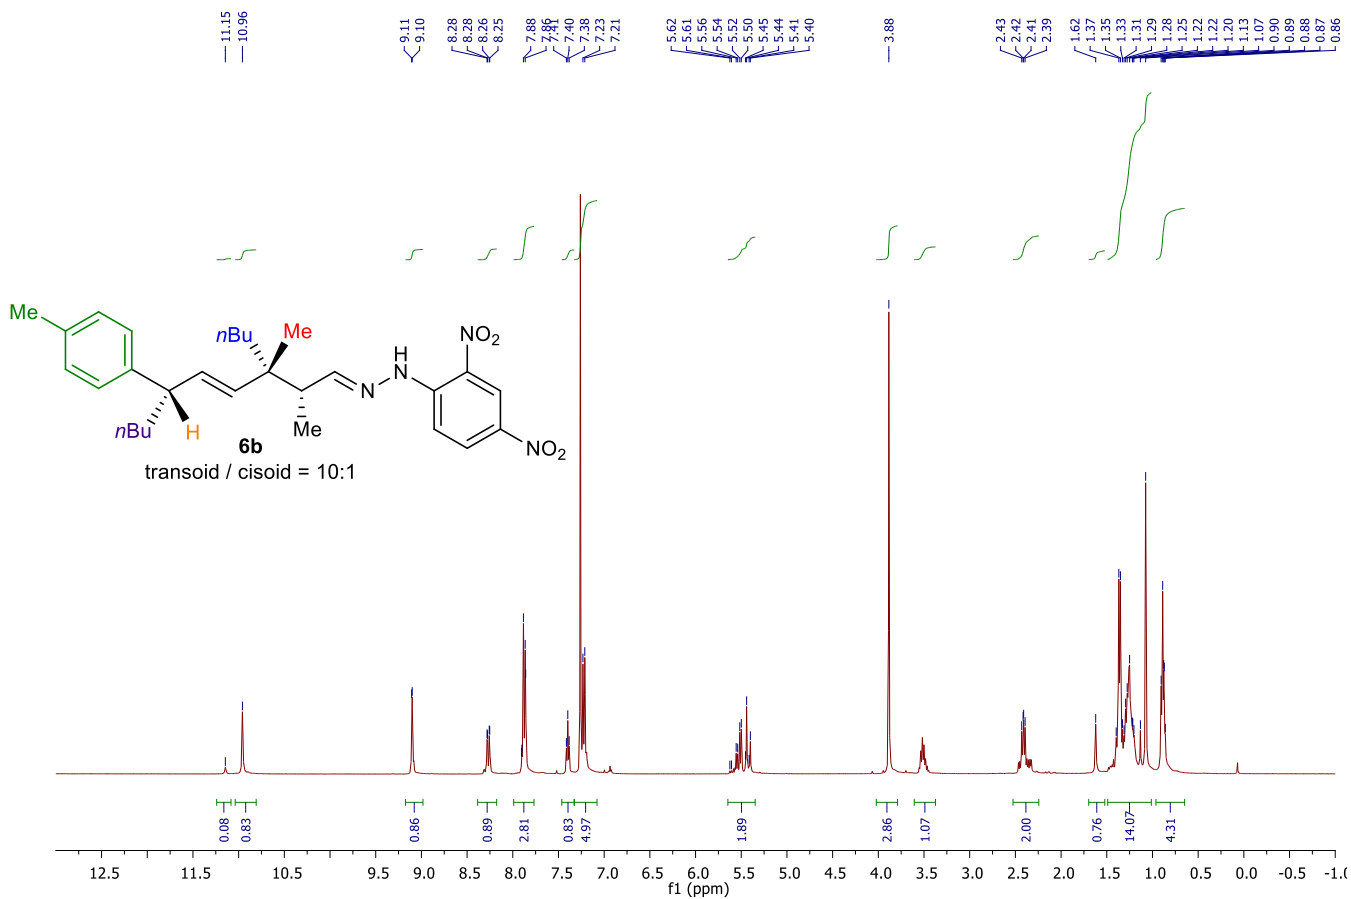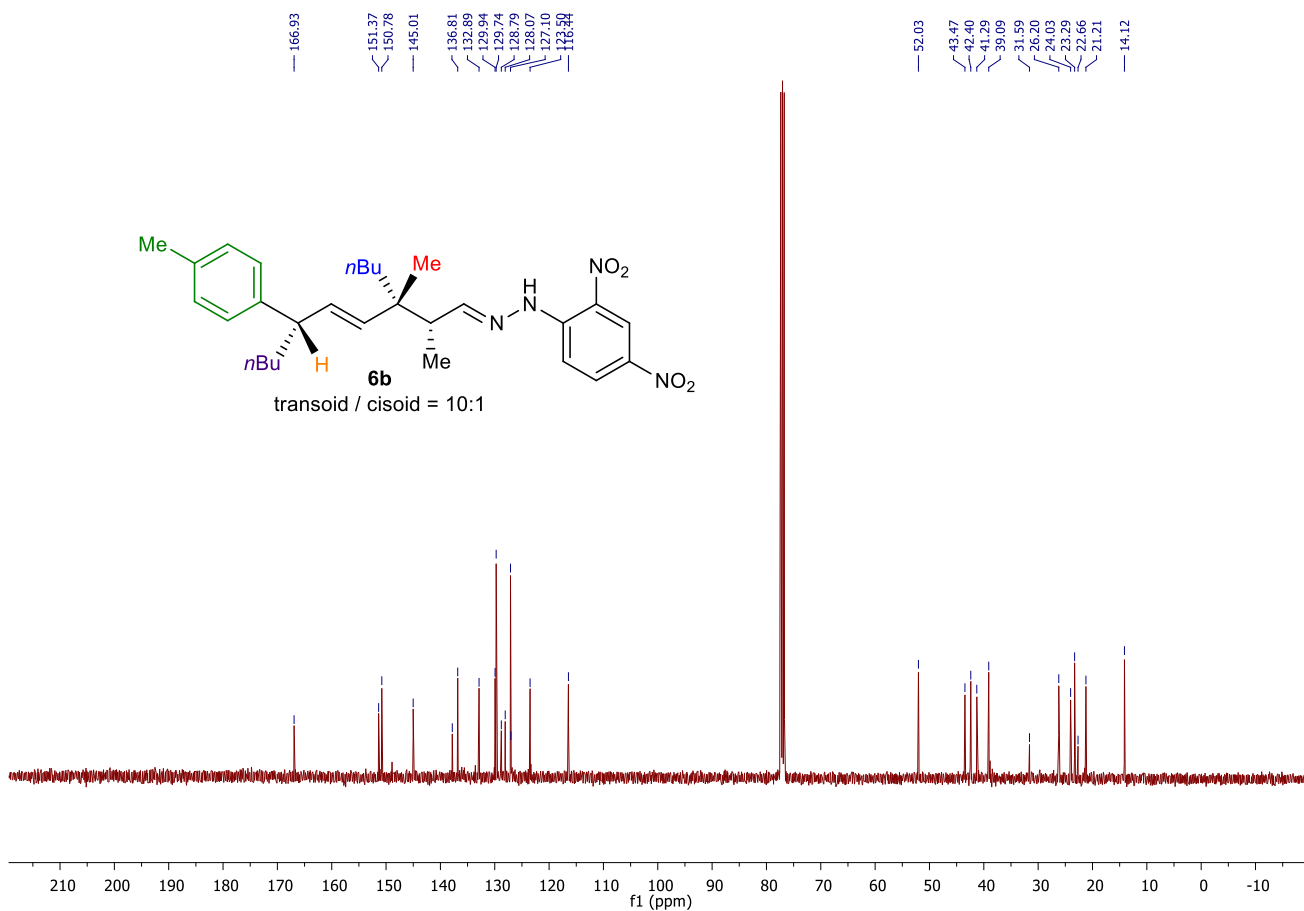

Supplement: NIHMS78592-supplement-Supplementary_information.pdf [file NIHMS78592-supplement-Supplementary_information.pdf]
